# Supplementary material for: Accelerating the discovery of energetic melt-castable materials by a high-throughput virtual screening and experimental approach
Source: Royal Society of Chemistry journal article supplement (doi:10.1039/d1ta04441a), 2021-01-01
Supplement: d1ta04441a1.zip [file d1ta04441a1.zip]

## Sheet: all
SMILES	Density	Dv	P	Tm	Td	Ring SMILES	Ring
O=[N+]([O-])c1noc([N+](=O)[O-])n1	1.88949	8.96089	36.9888	83.6922	174.196	c1ncon1	Oxa-3
O=[N+]([O-])c1nnc([N+](=O)[O-])o1	1.88709	8.96011	36.9239	77.1951	169.934	c1nnco1	Oxa-2
O=[N+]([O-])c1nnoc1[N+](=O)[O-]	1.86621	8.9376	36.6915	56.5996	164.464	c1conn1	Oxa-4
O=[N+]([O-])c1nonc1[N+](=O)[O-]	1.86537	8.93222	36.6598	57.9933	167.852	c1cnon1	Oxa-1
O=[N+]([O-])OCn1nnc([N+](=O)[O-])n1	1.79678	8.90378	33.7048	82.3051	150.476	c1nn[nH]n1	Tet-2
O=[N+]([O-])OCn1nnnc1[N+](=O)[O-]	1.79796	8.89986	34.2695	64.765	146.525	c1nnn[nH]1	Tet-1
O=[N+]([O-])OCn1nnc([N+](=O)[O-])c1[N+](=O)[O-]	1.82873	8.86931	34.742	86.1558	171.79	c1c[nH]nn1	Tra-1
O=[N+]([O-])OCn1nc([N+](=O)[O-])c([N+](=O)[O-])n1	1.8311	8.86792	34.7287	86.207	170.814	c1cn[nH]n1	Tra-2
O=[N+]([O-])OCn1nc([N+](=O)[O-])nc1[N+](=O)[O-]	1.82979	8.8629	34.7937	86.3482	175.732	c1nc[nH]n1	Tra-4
O=[N+]([O-])OCn1c([N+](=O)[O-])nnc1[N+](=O)[O-]	1.82451	8.83888	34.761	87.7943	184.657	c1nnc[nH]1	Tra-3
O=[N+]([O-])OCn1c([N+](=O)[O-])nc([N+](=O)[O-])c1[N+](=O)[O-]	1.86561	8.82996	35.634	104.105	196.881	c1c[nH]cn1	Imi
O=[N+]([O-])OCn1nc([N+](=O)[O-])c([N+](=O)[O-])c1[N+](=O)[O-]	1.85997	8.81051	35.3762	99.7289	197.668	c1cn[nH]c1	Pyr
O=[N+]([O-])OCCN(c1nnoc1[N+](=O)[O-])[N+](=O)[O-]	1.79361	8.6124	32.6422	57.773	152.854	c1conn1	Oxa-4
O=[N+]([O-])OCCN(c1nonc1[N+](=O)[O-])[N+](=O)[O-]	1.79516	8.60922	32.768	65.6104	156.366	c1cnon1	Oxa-1
O=[N+]([O-])OCCN(c1nnn(CO[N+](=O)[O-])c1[N+](=O)[O-])[N+](=O)[O-]	1.78223	8.6086	32.2855	81.1266	157.698	c1c[nH]nn1	Tra-1
O=[N+]([O-])OCCN(c1noc([N+](=O)[O-])n1)[N+](=O)[O-]	1.79105	8.60317	32.4773	59.5922	154.723	c1ncon1	Oxa-3
O=[N+]([O-])OCCN(c1onnc1[N+](=O)[O-])[N+](=O)[O-]	1.78851	8.60307	32.6256	67.7841	161.106	c1conn1	Oxa-4
O=[N+]([O-])OCCN(c1nnc([N+](=O)[O-])o1)[N+](=O)[O-]	1.79571	8.60065	32.6185	57.3226	152.647	c1nnco1	Oxa-2
O=[N+]([O-])OCCN(c1nnnn1CO[N+](=O)[O-])[N+](=O)[O-]	1.74239	8.59945	30.9956	60.9266	139.299	c1nnn[nH]1	Tet-1
O=[N+]([O-])OCCN(c1nc([N+](=O)[O-])n(CO[N+](=O)[O-])n1)[N+](=O)[O-]	1.77813	8.59387	32.112	80.9598	159.403	c1nc[nH]n1	Tra-4
O=[N+]([O-])OCCN(c1nc([N+](=O)[O-])n(CO[N+](=O)[O-])c1[N+](=O)[O-])[N+](=O)[O-]	1.81136	8.58915	33.4487	102.805	178.429	c1c[nH]cn1	Imi
O=[N+]([O-])OCCN(c1nnn(CO[N+](=O)[O-])n1)[N+](=O)[O-]	1.74465	8.58183	31.02	57.3311	138.163	c1nn[nH]n1	Tet-2
O=[N+]([O-])OCCN(c1nnc([N+](=O)[O-])n1CO[N+](=O)[O-])[N+](=O)[O-]	1.77837	8.58134	32.1889	80.4159	160.27	c1nnc[nH]1	Tra-3
O=[N+]([O-])OCCN(c1nc([N+](=O)[O-])no1)[N+](=O)[O-]	1.7948	8.57394	32.6617	61.0014	154.521	c1ncon1	Oxa-3
O=[N+]([O-])OCCN(c1nc([N+](=O)[O-])c([N+](=O)[O-])n1CO[N+](=O)[O-])[N+](=O)[O-]	1.81503	8.56415	33.4336	100.833	174.961	c1c[nH]cn1	Imi
O=[N+]([O-])OCc1nnn(CO[N+](=O)[O-])c1[N+](=O)[O-]	1.76885	8.56291	31.4003	84.88	162.522	c1c[nH]nn1	Tra-1
O=[N+]([O-])OCc1nnoc1[N+](=O)[O-]	1.78648	8.56191	32.0849	52.884	163.057	c1conn1	Oxa-4
O=[N+]([O-])OCCN(c1c([N+](=O)[O-])nn(CO[N+](=O)[O-])c1[N+](=O)[O-])[N+](=O)[O-]	1.80809	8.56085	33.2742	106.699	188.157	c1cn[nH]c1	Pyr
O=[N+]([O-])OCc1nc([N+](=O)[O-])n(CO[N+](=O)[O-])c1[N+](=O)[O-]	1.81138	8.55439	32.8065	97.0973	182.31	c1c[nH]cn1	Imi
O=[N+]([O-])OCc1nonc1[N+](=O)[O-]	1.79114	8.55364	32.3469	60.6144	166.699	c1cnon1	Oxa-1
O=[N+]([O-])OCc1nc([N+](=O)[O-])no1	1.78465	8.55314	31.8515	78.3238	173.86	c1ncon1	Oxa-3
O=[N+]([O-])OCc1noc([N+](=O)[O-])n1	1.79055	8.55251	32.186	59.4338	165.901	c1ncon1	Oxa-3
O=[N+]([O-])OCc1nnc([N+](=O)[O-])o1	1.78427	8.55194	31.7587	72.7675	171.71	c1nnco1	Oxa-2
O=[N+]([O-])OCc1nnn(CO[N+](=O)[O-])n1	1.72163	8.5464	29.7561	70.0251	137.625	c1nn[nH]n1	Tet-2
O=[N+]([O-])OCc1nn(CO[N+](=O)[O-])c([N+](=O)[O-])c1[N+](=O)[O-]	1.80577	8.54079	32.4666	96.3503	187.05	c1cn[nH]c1	Pyr
O=[N+]([O-])OCCN(c1nc([N+](=O)[O-])nn1CO[N+](=O)[O-])[N+](=O)[O-]	1.7756	8.54036	32.0323	83.1268	162.735	c1nc[nH]n1	Tra-4
O=[N+]([O-])OCc1c([N+](=O)[O-])nn(CO[N+](=O)[O-])c1[N+](=O)[O-]	1.81148	8.53982	32.771	95.6556	184.011	c1cn[nH]c1	Pyr
O=[N+]([O-])OCc1onnc1[N+](=O)[O-]	1.80118	8.53889	32.7378	60.7888	165.584	c1conn1	Oxa-4
CN(c1nnn(CO[N+](=O)[O-])n1)[N+](=O)[O-]	1.70663	8.53171	29.8652	70.5179	138.008	c1nn[nH]n1	Tet-2
CN(c1nn(CO[N+](=O)[O-])nc1[N+](=O)[O-])[N+](=O)[O-]	1.74445	8.52578	30.9988	93.1141	161.421	c1cn[nH]n1	Tra-2
O=[N+]([O-])OCCN(c1c([N+](=O)[O-])nc([N+](=O)[O-])n1CO[N+](=O)[O-])[N+](=O)[O-]	1.80814	8.52484	33.3141	109.785	191.747	c1c[nH]cn1	Imi
O=[N+]([O-])OCCN(c1nn(CO[N+](=O)[O-])c([N+](=O)[O-])c1[N+](=O)[O-])[N+](=O)[O-]	1.81206	8.5231	33.297	108.895	187.151	c1cn[nH]c1	Pyr
CN(c1nnn(CO[N+](=O)[O-])c1[N+](=O)[O-])[N+](=O)[O-]	1.74278	8.52165	31.1424	95.6928	164.854	c1c[nH]nn1	Tra-1
O=[N+]([O-])OCc1nc([N+](=O)[O-])n(CO[N+](=O)[O-])n1	1.76471	8.5172	31.4585	78.4198	169.199	c1nc[nH]n1	Tra-4
CN(c1nc([N+](=O)[O-])n(CO[N+](=O)[O-])n1)[N+](=O)[O-]	1.75071	8.51509	31.2675	92.3545	160.95	c1nc[nH]n1	Tra-4
O=[N+]([O-])OCn1cc([N+](=O)[O-])c([N+](=O)[O-])n1	1.78303	8.51477	31.3386	98.7131	199.223	c1cn[nH]c1	Pyr
CN(c1noc([N+](=O)[O-])n1)[N+](=O)[O-]	1.7664	8.51468	31.5451	70.4691	154.573	c1ncon1	Oxa-3
CN(c1nc([N+](=O)[O-])n(CO[N+](=O)[O-])c1[N+](=O)[O-])[N+](=O)[O-]	1.78345	8.51366	32.2702	115.91	182.499	c1c[nH]cn1	Imi
O=[N+]([O-])OCc1nn(CO[N+](=O)[O-])nc1[N+](=O)[O-]	1.76809	8.51365	31.5168	75.0582	165.734	c1cn[nH]n1	Tra-2
CN(c1nn(CO[N+](=O)[O-])c([N+](=O)[O-])c1[N+](=O)[O-])[N+](=O)[O-]	1.78431	8.51341	32.1747	115.493	180.957	c1cn[nH]c1	Pyr
CN(c1nnoc1[N+](=O)[O-])[N+](=O)[O-]	1.75342	8.51231	31.2764	58.7633	148.965	c1conn1	Oxa-4
O=[N+]([O-])OCCN(c1c([N+](=O)[O-])c([N+](=O)[O-])nn1CO[N+](=O)[O-])[N+](=O)[O-]	1.80678	8.51108	33.0946	107.099	188.056	c1cn[nH]c1	Pyr
CN(c1nnc([N+](=O)[O-])o1)[N+](=O)[O-]	1.76997	8.51008	31.6346	67.7206	152.393	c1nnco1	Oxa-2
O=[N+]([O-])OCc1nnnn1CO[N+](=O)[O-]	1.72174	8.51003	30.0449	53.8633	139.629	c1nnn[nH]1	Tet-1
CN(c1c([N+](=O)[O-])nn(CO[N+](=O)[O-])c1[N+](=O)[O-])[N+](=O)[O-]	1.77799	8.50972	31.8297	118.069	185.695	c1cn[nH]c1	Pyr
O=[N+]([O-])OCCN(c1nn(CO[N+](=O)[O-])nc1[N+](=O)[O-])[N+](=O)[O-]	1.77879	8.50962	32.2012	85.8877	162.234	c1cn[nH]n1	Tra-2
O=[N+]([O-])OCc1nc([N+](=O)[O-])nn1CO[N+](=O)[O-]	1.76666	8.50635	31.4426	75.1949	163.629	c1nc[nH]n1	Tra-4
O=[N+]([O-])OCc1nc([N+](=O)[O-])c([N+](=O)[O-])n1CO[N+](=O)[O-]	1.80072	8.50553	32.3331	94.3696	189.425	c1c[nH]cn1	Imi
CN(c1nc([N+](=O)[O-])no1)[N+](=O)[O-]	1.77448	8.50542	31.738	76.9552	159.551	c1ncon1	Oxa-3
O=[N+]([O-])OCCN(c1c([N+](=O)[O-])nnn1CO[N+](=O)[O-])[N+](=O)[O-]	1.77449	8.50368	32.2112	87.0103	173.042	c1c[nH]nn1	Tra-1
O=[N+]([O-])OCc1nnc([N+](=O)[O-])n1CO[N+](=O)[O-]	1.76758	8.50163	31.6803	76.3895	164.999	c1nnc[nH]1	Tra-3
CN(c1onnc1[N+](=O)[O-])[N+](=O)[O-]	1.75709	8.50055	31.3441	66.8806	152.693	c1conn1	Oxa-4
O=[N+]([O-])OCc1c([N+](=O)[O-])nnn1CO[N+](=O)[O-]	1.76307	8.49951	31.271	77.8819	171.356	c1c[nH]nn1	Tra-1
CN(c1nnnn1CO[N+](=O)[O-])[N+](=O)[O-]	1.70044	8.49209	29.9626	61.3834	133.273	c1nnn[nH]1	Tet-1
O=[N+]([O-])OCn1ncc([N+](=O)[O-])c1[N+](=O)[O-]	1.78113	8.48448	31.5945	100.351	202.168	c1cn[nH]c1	Pyr
O=[N+]([O-])OCCn1c([N+](=O)[O-])nc([N+](=O)[O-])c1[N+](=O)[O-]	1.79981	8.48298	32.1226	102.242	203.337	c1c[nH]cn1	Imi
O=[N+]([O-])OCCn1nnc([N+](=O)[O-])c1[N+](=O)[O-]	1.7523	8.48297	30.5069	88.4185	182.404	c1c[nH]nn1	Tra-1
O=[N+]([O-])OCCn1nc([N+](=O)[O-])c([N+](=O)[O-])n1	1.75031	8.48153	30.2928	90.5387	182.002	c1cn[nH]n1	Tra-2
O=[N+]([O-])OCCn1nc([N+](=O)[O-])c([N+](=O)[O-])c1[N+](=O)[O-]	1.79102	8.47847	31.7459	100.81	202.646	c1cn[nH]c1	Pyr
O=[N+]([O-])OCc1c([N+](=O)[O-])nc([N+](=O)[O-])n1CO[N+](=O)[O-]	1.80324	8.47761	32.5699	102.992	195.339	c1c[nH]cn1	Imi
O=[N+]([O-])OCCn1nc([N+](=O)[O-])nc1[N+](=O)[O-]	1.76373	8.47725	30.8401	85.9366	182.786	c1nc[nH]n1	Tra-4
CN(c1c([N+](=O)[O-])c([N+](=O)[O-])nn1CO[N+](=O)[O-])[N+](=O)[O-]	1.78034	8.47658	31.9405	115.161	180.377	c1cn[nH]c1	Pyr
O=[N+]([O-])OCc1c([N+](=O)[O-])c([N+](=O)[O-])nn1CO[N+](=O)[O-]	1.80072	8.47468	32.386	97.0738	190.008	c1cn[nH]c1	Pyr
O=[N+]([O-])OCn1cnc([N+](=O)[O-])c1[N+](=O)[O-]	1.78382	8.47468	31.4974	103.558	198.187	c1c[nH]cn1	Imi
O=[N+]([O-])OCn1nc([N+](=O)[O-])cc1[N+](=O)[O-]	1.77943	8.47249	31.538	98.7887	209.626	c1cn[nH]c1	Pyr
CN(c1nonc1[N+](=O)[O-])[N+](=O)[O-]	1.75044	8.46825	31.373	67.6796	155.79	c1cnon1	Oxa-1
CN(c1c([N+](=O)[O-])nc([N+](=O)[O-])n1CO[N+](=O)[O-])[N+](=O)[O-]	1.78029	8.4669	31.9959	121.789	185.619	c1c[nH]cn1	Imi
O=[N+]([O-])OCCn1nnnc1[N+](=O)[O-]	1.71237	8.46231	29.1471	68.3713	161.326	c1nnn[nH]1	Tet-1
O=[N+]([O-])OCn1ncc([N+](=O)[O-])n1	1.74011	8.46152	30.0799	92.1679	179.691	c1cn[nH]n1	Tra-2
CN(c1nnc([N+](=O)[O-])n1CO[N+](=O)[O-])[N+](=O)[O-]	1.73973	8.46117	31.1748	95.2092	164.608	c1nnc[nH]1	Tra-3
O=[N+]([O-])OCCn1c([N+](=O)[O-])nnc1[N+](=O)[O-]	1.76281	8.45974	31.1338	82.7142	184.854	c1nnc[nH]1	Tra-3
CN(c1nc([N+](=O)[O-])c([N+](=O)[O-])n1CO[N+](=O)[O-])[N+](=O)[O-]	1.7791	8.45903	32.0389	117.414	181.041	c1c[nH]cn1	Imi
O=[N+]([O-])OCn1cc([N+](=O)[O-])nc1[N+](=O)[O-]	1.7784	8.45732	31.4203	101.952	209.308	c1c[nH]cn1	Imi
CN(c1c([N+](=O)[O-])nnn1CO[N+](=O)[O-])[N+](=O)[O-]	1.73646	8.45293	31.0474	93.3024	170.491	c1c[nH]nn1	Tra-1
O=[N+]([O-])OCCN(c1nn(CO[N+](=O)[O-])c(N(CCO[N+](=O)[O-])[N+](=O)[O-])c1[N+](=O)[O-])[N+](=O)[O-]	1.77881	8.45223	32.5237	122.809	191.821	c1cn[nH]c1	Pyr
O=[N+]([O-])OCn1cc([N+](=O)[O-])nn1	1.73842	8.44873	29.8937	94.1373	179.813	c1c[nH]nn1	Tra-1
O=[N+]([O-])OCn1nncc1[N+](=O)[O-]	1.73853	8.44781	30.4916	74.713	180.462	c1c[nH]nn1	Tra-1
O=[N+]([O-])OCn1ncnc1[N+](=O)[O-]	1.73862	8.44438	30.485	74.3773	179.317	c1nc[nH]n1	Tra-4
O=[N+]([O-])OCCn1nnc([N+](=O)[O-])n1	1.71395	8.44302	29.0483	71.5189	162.869	c1nn[nH]n1	Tet-2
CN(c1nc([N+](=O)[O-])nn1CO[N+](=O)[O-])[N+](=O)[O-]	1.73669	8.4419	31.1106	101.028	160.061	c1nc[nH]n1	Tra-4
O=[N+]([O-])OCn1c([N+](=O)[O-])cnc1[N+](=O)[O-]	1.77765	8.44049	31.8918	102.847	213.572	c1c[nH]cn1	Imi
O=[N+]([O-])OCn1cnc([N+](=O)[O-])n1	1.73195	8.43346	29.7016	92.6102	179.625	c1nc[nH]n1	Tra-4
O=[N+]([O-])OCn1cnnc1[N+](=O)[O-]	1.73757	8.42758	30.3575	75.1377	179.521	c1nnc[nH]1	Tra-3
O=[N+]([O-])c1nnco1	1.76509	8.41809	31.165	53.744	184.823	c1nnco1	Oxa-2
O=[N+]([O-])c1cnno1	1.75747	8.41767	31.0606	45.6824	179.231	c1conn1	Oxa-4
O=[N+]([O-])c1ncon1	1.76607	8.41743	31.2062	59.0922	188.524	c1ncon1	Oxa-3
O=[N+]([O-])c1ncno1	1.76347	8.41707	31.1797	52.53	183.412	c1ncon1	Oxa-3
O=[N+]([O-])OCCN(c1nnoc1N(CCO[N+](=O)[O-])[N+](=O)[O-])[N+](=O)[O-]	1.7582	8.4165	31.2936	67.4427	164.928	c1conn1	Oxa-4
O=[N+]([O-])c1conn1	1.76342	8.41588	31.1506	57.4626	188.544	c1conn1	Oxa-4
O=[N+]([O-])c1cnon1	1.76288	8.41529	31.1852	57.8775	188.148	c1cnon1	Oxa-1
O=[N+]([O-])OCCN(c1noc(N(CCO[N+](=O)[O-])[N+](=O)[O-])n1)[N+](=O)[O-]	1.7561	8.4079	31.075	67.2717	165.584	c1ncon1	Oxa-3
O=[N+]([O-])OCCN(c1nnc(N(CCO[N+](=O)[O-])[N+](=O)[O-])o1)[N+](=O)[O-]	1.74983	8.3678	31.2673	67.9178	170.128	c1nnco1	Oxa-2
O=[N+]([O-])OCCN(c1nnn(CO[N+](=O)[O-])c1N(CCO[N+](=O)[O-])[N+](=O)[O-])[N+](=O)[O-]	1.7619	8.36624	31.1757	88.1279	170.731	c1c[nH]nn1	Tra-1
O=[N+]([O-])OCCN(c1nc([N+](=O)[O-])c(N(CCO[N+](=O)[O-])[N+](=O)[O-])n1CO[N+](=O)[O-])[N+](=O)[O-]	1.78505	8.36331	32.2882	106.914	177.68	c1c[nH]cn1	Imi
O=[N+]([O-])OCCN(c1nnc(N(CCO[N+](=O)[O-])[N+](=O)[O-])n1CO[N+](=O)[O-])[N+](=O)[O-]	1.76304	8.34857	31.075	89.6226	169.625	c1nnc[nH]1	Tra-3
Cn1c([N+](=O)[O-])nc([N+](=O)[O-])c1[N+](=O)[O-]	1.76561	8.34762	30.6713	116.184	215.532	c1c[nH]cn1	Imi
Cn1c([N+](=O)[O-])nnc1[N+](=O)[O-]	1.72677	8.34571	29.3774	104.266	198.593	c1nnc[nH]1	Tra-3
CN(c1c([N+](=O)[O-])c(N(CCO[N+](=O)[O-])[N+](=O)[O-])nn1CO[N+](=O)[O-])[N+](=O)[O-]	1.74823	8.34358	30.6621	124.01	187.348	c1cn[nH]c1	Pyr
O=[N+]([O-])OCCN(c1nc(N(CCO[N+](=O)[O-])[N+](=O)[O-])n(CO[N+](=O)[O-])c1[N+](=O)[O-])[N+](=O)[O-]	1.78529	8.34212	32.3338	116.322	188.69	c1c[nH]cn1	Imi
O=[N+]([O-])OCCN(c1c([N+](=O)[O-])nn(CCO[N+](=O)[O-])c1[N+](=O)[O-])[N+](=O)[O-]	1.75686	8.34004	30.7295	103.077	183.086	c1cn[nH]c1	Pyr
O=[N+]([O-])OCCN(c1nc([N+](=O)[O-])n(CO[N+](=O)[O-])c1N(CCO[N+](=O)[O-])[N+](=O)[O-])[N+](=O)[O-]	1.77949	8.33996	32.1523	112.695	184.211	c1c[nH]cn1	Imi
O=[N+]([O-])OCCN(c1nc(CO[N+](=O)[O-])no1)[N+](=O)[O-]	1.74198	8.33989	29.691	56.432	151.626	c1ncon1	Oxa-3
O=[N+]([O-])OCCN(c1nonc1N(CCO[N+](=O)[O-])[N+](=O)[O-])[N+](=O)[O-]	1.76459	8.33767	31.376	71.0084	168.788	c1cnon1	Oxa-1
O=[N+]([O-])OCCN(c1nn(CO[N+](=O)[O-])c([N+](=O)[O-])c1N(CCO[N+](=O)[O-])[N+](=O)[O-])[N+](=O)[O-]	1.79022	8.33616	32.3157	110.501	178.401	c1cn[nH]c1	Pyr
O=[N+]([O-])OCCN(c1nonc1CO[N+](=O)[O-])[N+](=O)[O-]	1.73803	8.3359	29.8797	67.3904	157.189	c1cnon1	Oxa-1
CN(c1nnc(N(CCO[N+](=O)[O-])[N+](=O)[O-])n1CO[N+](=O)[O-])[N+](=O)[O-]	1.7123	8.33448	29.8121	96.5569	172.278	c1nnc[nH]1	Tra-3
CN(c1c(N(CCO[N+](=O)[O-])[N+](=O)[O-])nnn1CO[N+](=O)[O-])[N+](=O)[O-]	1.71113	8.33298	29.6124	100.635	175.277	c1c[nH]nn1	Tra-1
Cn1nc([N+](=O)[O-])c([N+](=O)[O-])c1[N+](=O)[O-]	1.75989	8.32971	30.5969	109.334	212.287	c1cn[nH]c1	Pyr
Cn1nc([N+](=O)[O-])nc1[N+](=O)[O-]	1.73051	8.32946	29.6665	100.758	195.78	c1nc[nH]n1	Tra-4
CN(c1nonc1N(CCO[N+](=O)[O-])[N+](=O)[O-])[N+](=O)[O-]	1.71854	8.32623	29.958	72.7334	159.887	c1cnon1	Oxa-1
O=[N+]([O-])OCCN(c1c([N+](=O)[O-])c(CO[N+](=O)[O-])nn1CO[N+](=O)[O-])[N+](=O)[O-]	1.765	8.32497	31.3285	106.616	185.74	c1cn[nH]c1	Pyr
O=[N+]([O-])OCCN(c1nnoc1CO[N+](=O)[O-])[N+](=O)[O-]	1.74486	8.32259	29.8822	57.0673	152.428	c1conn1	Oxa-4
O=[N+]([O-])OCCN(c1nn(CO[N+](=O)[O-])nc1N(CCO[N+](=O)[O-])[N+](=O)[O-])[N+](=O)[O-]	1.75765	8.31786	31.1015	112.962	197.106	c1cn[nH]n1	Tra-2
O=[N+]([O-])OCCN(c1c([N+](=O)[O-])nc(CO[N+](=O)[O-])n1CO[N+](=O)[O-])[N+](=O)[O-]	1.76653	8.31648	30.8465	92.3369	172.308	c1c[nH]cn1	Imi
CN(c1nn(CO[N+](=O)[O-])c(N(CCO[N+](=O)[O-])[N+](=O)[O-])c1[N+](=O)[O-])[N+](=O)[O-]	1.75029	8.30987	31.0782	119.651	186.986	c1cn[nH]c1	Pyr
CN(c1nc(N(CCO[N+](=O)[O-])[N+](=O)[O-])c([N+](=O)[O-])n1CO[N+](=O)[O-])[N+](=O)[O-]	1.74538	8.30645	30.9425	120.863	188.383	c1c[nH]cn1	Imi
O=[N+]([O-])OCCN(c1onnc1CO[N+](=O)[O-])[N+](=O)[O-]	1.73932	8.30524	29.9196	65.8575	163.283	c1conn1	Oxa-4
CN(c1nc([N+](=O)[O-])n(CO[N+](=O)[O-])c1N(CCO[N+](=O)[O-])[N+](=O)[O-])[N+](=O)[O-]	1.7452	8.3052	30.857	117.32	181.835	c1c[nH]cn1	Imi
O=[N+]([O-])OCCN(c1nnc(CO[N+](=O)[O-])o1)[N+](=O)[O-]	1.73876	8.30443	29.59	55.1679	155.402	c1nnco1	Oxa-2
CN(c1nn(CO[N+](=O)[O-])c([N+](=O)[O-])c1N(CCO[N+](=O)[O-])[N+](=O)[O-])[N+](=O)[O-]	1.74138	8.30316	31.2971	122.944	195.132	c1cn[nH]c1	Pyr
O=[N+]([O-])OCCN(c1c([N+](=O)[O-])nn(CO[N+](=O)[O-])c1N(CCO[N+](=O)[O-])[N+](=O)[O-])[N+](=O)[O-]	1.7799	8.30136	32.2595	121.289	195.367	c1cn[nH]c1	Pyr
O=[N+]([O-])OCCN(c1nc([N+](=O)[O-])n(CO[N+](=O)[O-])c1CO[N+](=O)[O-])[N+](=O)[O-]	1.76975	8.30114	30.9255	91.1862	168.463	c1c[nH]cn1	Imi
O=[N+]([O-])OCCN(c1nc([N+](=O)[O-])n(CCO[N+](=O)[O-])c1[N+](=O)[O-])[N+](=O)[O-]	1.76453	8.29982	30.8918	98.1231	181.493	c1c[nH]cn1	Imi
Cn1nnc([N+](=O)[O-])c1[N+](=O)[O-]	1.70773	8.29944	29.374	88.6739	190.227	c1c[nH]nn1	Tra-1
O=[N+]([O-])OCCN(c1c([N+](=O)[O-])nn(CO[N+](=O)[O-])c1CO[N+](=O)[O-])[N+](=O)[O-]	1.75632	8.29939	30.9831	102.621	185.928	c1cn[nH]c1	Pyr
O=[N+]([O-])OCCN(c1nn(CO[N+](=O)[O-])c(CO[N+](=O)[O-])c1[N+](=O)[O-])[N+](=O)[O-]	1.77605	8.29764	31.0261	95.5802	174.567	c1cn[nH]c1	Pyr
CN(c1nnc(N(CCO[N+](=O)[O-])[N+](=O)[O-])o1)[N+](=O)[O-]	1.71382	8.29652	29.5559	67.7485	158.098	c1nnco1	Oxa-2
O=[N+]([O-])OCCN(c1nc(CO[N+](=O)[O-])n(CO[N+](=O)[O-])n1)[N+](=O)[O-]	1.74073	8.29443	29.5382	69.804	152.098	c1nc[nH]n1	Tra-4
CN(c1nc([N+](=O)[O-])c(N(CCO[N+](=O)[O-])[N+](=O)[O-])n1CO[N+](=O)[O-])[N+](=O)[O-]	1.74793	8.2929	30.953	115.416	181.171	c1c[nH]cn1	Imi
O=[N+]([O-])OCCN(c1ncc([N+](=O)[O-])n1CO[N+](=O)[O-])[N+](=O)[O-]	1.75001	8.29177	30.1164	93.7997	178.628	c1c[nH]cn1	Imi
O=[N+]([O-])OCCN(c1c(CO[N+](=O)[O-])nn(CO[N+](=O)[O-])c1[N+](=O)[O-])[N+](=O)[O-]	1.76713	8.28864	31.1323	101.23	187.273	c1cn[nH]c1	Pyr
O=[N+]([O-])OCCN(c1ncn(CO[N+](=O)[O-])c1[N+](=O)[O-])[N+](=O)[O-]	1.74802	8.28606	29.9248	92.0377	175.529	c1c[nH]cn1	Imi
O=[N+]([O-])OCCN(c1cnn(CO[N+](=O)[O-])c1[N+](=O)[O-])[N+](=O)[O-]	1.74363	8.28583	29.9301	94.8517	181.066	c1cn[nH]c1	Pyr
CN(c1c(N(CCO[N+](=O)[O-])[N+](=O)[O-])nc([N+](=O)[O-])n1CO[N+](=O)[O-])[N+](=O)[O-]	1.74471	8.28489	30.6878	120.567	182.373	c1c[nH]cn1	Imi
O=[N+]([O-])OCCN(c1nc(CO[N+](=O)[O-])c([N+](=O)[O-])n1CO[N+](=O)[O-])[N+](=O)[O-]	1.7717	8.28446	30.8869	104.039	184.165	c1c[nH]cn1	Imi
O=[N+]([O-])OCCN(c1cn(CO[N+](=O)[O-])c([N+](=O)[O-])n1)[N+](=O)[O-]	1.74173	8.28338	29.6349	94.6953	177.362	c1c[nH]cn1	Imi
O=[N+]([O-])OCCN(c1nc([N+](=O)[O-])n(CCO[N+](=O)[O-])n1)[N+](=O)[O-]	1.72626	8.28329	29.1294	77.6667	165.715	c1nc[nH]n1	Tra-4
O=[N+]([O-])OCCN(c1nnn(CCO[N+](=O)[O-])n1)[N+](=O)[O-]	1.68144	8.28126	27.4159	65.5847	147.967	c1nn[nH]n1	Tet-2
CN(c1noc(N(CCO[N+](=O)[O-])[N+](=O)[O-])n1)[N+](=O)[O-]	1.72025	8.27757	29.7667	63.4112	150.204	c1ncon1	Oxa-3
Cn1nc([N+](=O)[O-])c([N+](=O)[O-])n1	1.69857	8.27732	29.2971	90.5952	189.353	c1cn[nH]n1	Tra-2
O=[N+]([O-])OCCN(c1nnn(CO[N+](=O)[O-])c1CO[N+](=O)[O-])[N+](=O)[O-]	1.73315	8.27689	29.775	85.4907	170.177	c1c[nH]nn1	Tra-1
O=[N+]([O-])OCCN(c1cc([N+](=O)[O-])n(CO[N+](=O)[O-])n1)[N+](=O)[O-]	1.74762	8.27462	29.9061	97.93	183.901	c1cn[nH]c1	Pyr
O=[N+]([O-])OCCN(c1nn(CO[N+](=O)[O-])nc1CO[N+](=O)[O-])[N+](=O)[O-]	1.7443	8.2728	29.8668	70.8162	152.211	c1cn[nH]n1	Tra-2
O=[N+]([O-])OCCN(c1nnn(CCO[N+](=O)[O-])c1[N+](=O)[O-])[N+](=O)[O-]	1.72932	8.27221	29.3315	78.0685	167.258	c1c[nH]nn1	Tra-1
O=[N+]([O-])OCCN(c1cn(CO[N+](=O)[O-])nc1[N+](=O)[O-])[N+](=O)[O-]	1.73434	8.27168	29.6061	98.2296	179.942	c1cn[nH]c1	Pyr
O=[N+]([O-])OCCN(c1nc(CO[N+](=O)[O-])n(CO[N+](=O)[O-])c1[N+](=O)[O-])[N+](=O)[O-]	1.774	8.27099	31.0273	96.9764	172.257	c1c[nH]cn1	Imi
O=[N+]([O-])OCCN(c1noc(CO[N+](=O)[O-])n1)[N+](=O)[O-]	1.74435	8.27077	29.7821	59.5814	160.414	c1ncon1	Oxa-3
CN(c1nn(CO[N+](=O)[O-])nc1N(CCO[N+](=O)[O-])[N+](=O)[O-])[N+](=O)[O-]	1.71451	8.27067	29.622	103.796	175.367	c1cn[nH]n1	Tra-2
O=[N+]([O-])OCCN(c1cnc([N+](=O)[O-])n1CO[N+](=O)[O-])[N+](=O)[O-]	1.74569	8.26976	29.9871	91.6908	178.958	c1c[nH]cn1	Imi
O=[N+]([O-])OCCN(c1nc(N(CCO[N+](=O)[O-])[N+](=O)[O-])n(CO[N+](=O)[O-])n1)[N+](=O)[O-]	1.76079	8.26858	30.9147	103.407	179.144	c1nc[nH]n1	Tra-4
O=[N+]([O-])OCc1nn(CO[N+](=O)[O-])c([N+](=O)[O-])c1CO[N+](=O)[O-]	1.76492	8.26545	30.1229	88.5802	171.618	c1cn[nH]c1	Pyr
O=[N+]([O-])OCCN(c1ncnn1CO[N+](=O)[O-])[N+](=O)[O-]	1.70488	8.26526	28.4784	69.9459	155.506	c1nc[nH]n1	Tra-4
O=[N+]([O-])OCCN(c1c(CO[N+](=O)[O-])c([N+](=O)[O-])nn1CO[N+](=O)[O-])[N+](=O)[O-]	1.76402	8.2643	31.1803	102.946	191.052	c1cn[nH]c1	Pyr
O=[N+]([O-])OCCN(c1nnnn1CCO[N+](=O)[O-])[N+](=O)[O-]	1.69422	8.26375	27.7527	55.529	143.733	c1nnn[nH]1	Tet-1
CN(c1nnn(CO[N+](=O)[O-])c1N(CCO[N+](=O)[O-])[N+](=O)[O-])[N+](=O)[O-]	1.71659	8.26257	29.9548	98.157	173.835	c1c[nH]nn1	Tra-1
CN(c1nc(N(CCO[N+](=O)[O-])[N+](=O)[O-])nn1CO[N+](=O)[O-])[N+](=O)[O-]	1.71935	8.26256	29.729	92.5171	163.168	c1nc[nH]n1	Tra-4
O=[N+]([O-])OCCN(c1nc([N+](=O)[O-])c([N+](=O)[O-])n1CCO[N+](=O)[O-])[N+](=O)[O-]	1.74846	8.26158	30.6966	108.966	198.659	c1c[nH]cn1	Imi
CN(c1c([N+](=O)[O-])nc(N(CCO[N+](=O)[O-])[N+](=O)[O-])n1CO[N+](=O)[O-])[N+](=O)[O-]	1.74557	8.25967	30.6903	123.368	185.358	c1c[nH]cn1	Imi
O=[N+]([O-])OCCN(c1c(CO[N+](=O)[O-])nnn1CO[N+](=O)[O-])[N+](=O)[O-]	1.74122	8.25939	29.8053	79.4459	162.675	c1c[nH]nn1	Tra-1
CN(c1onnc1N(CCO[N+](=O)[O-])[N+](=O)[O-])[N+](=O)[O-]	1.71415	8.25756	29.7638	78.2596	170.004	c1conn1	Oxa-4
O=[N+]([O-])OCCN(c1c([N+](=O)[O-])ncn1CO[N+](=O)[O-])[N+](=O)[O-]	1.73672	8.25701	29.7385	94.7655	182.002	c1c[nH]cn1	Imi
O=[N+]([O-])OCCc1nc([N+](=O)[O-])n(CO[N+](=O)[O-])c1[N+](=O)[O-]	1.75441	8.25697	29.7368	94.5969	189.191	c1c[nH]cn1	Imi
O=[N+]([O-])OCCN(c1nc([N+](=O)[O-])c(CO[N+](=O)[O-])n1CO[N+](=O)[O-])[N+](=O)[O-]	1.77107	8.25639	30.9061	101.89	176.458	c1c[nH]cn1	Imi
O=[N+]([O-])OCCN(c1nn(CO[N+](=O)[O-])c([N+](=O)[O-])c1CO[N+](=O)[O-])[N+](=O)[O-]	1.77488	8.25625	31.0001	104.805	178.852	c1cn[nH]c1	Pyr
O=[N+]([O-])OCCc1c([N+](=O)[O-])nn(CO[N+](=O)[O-])c1[N+](=O)[O-]	1.75675	8.25599	29.7772	94.6588	189.35	c1cn[nH]c1	Pyr
CN(c1c(N(CCO[N+](=O)[O-])[N+](=O)[O-])c([N+](=O)[O-])nn1CO[N+](=O)[O-])[N+](=O)[O-]	1.73316	8.25467	31.1315	130.042	205.08	c1cn[nH]c1	Pyr
O=[N+]([O-])OCc1nc(CO[N+](=O)[O-])n(CO[N+](=O)[O-])c1[N+](=O)[O-]	1.76206	8.25365	29.9467	89.1002	172.983	c1c[nH]cn1	Imi
CN(c1c(N(CCO[N+](=O)[O-])[N+](=O)[O-])nn(CO[N+](=O)[O-])c1[N+](=O)[O-])[N+](=O)[O-]	1.74744	8.252	30.6789	128.273	188.349	c1cn[nH]c1	Pyr
O=[N+]([O-])OCCN(c1nn(CO[N+](=O)[O-])c(N(CCO[N+](=O)[O-])[N+](=O)[O-])c1N(CCO[N+](=O)[O-])[N+](=O)[O-])[N+](=O)[O-]	1.77728	8.25129	32.4099	132.468	204.586	c1cn[nH]c1	Pyr
O=[N+]([O-])OCc1nn(CO[N+](=O)[O-])c(CO[N+](=O)[O-])c1[N+](=O)[O-]	1.76444	8.25068	29.913	89.0683	172.843	c1cn[nH]c1	Pyr
CN(c1c([N+](=O)[O-])nn(CO[N+](=O)[O-])c1N(CCO[N+](=O)[O-])[N+](=O)[O-])[N+](=O)[O-]	1.73828	8.25003	30.8143	130.178	202.174	c1cn[nH]c1	Pyr
O=[N+]([O-])OCCN(c1ncn(CO[N+](=O)[O-])n1)[N+](=O)[O-]	1.71021	8.24974	28.3161	68.748	152.871	c1nc[nH]n1	Tra-4
CN(c1nc(N(CCO[N+](=O)[O-])[N+](=O)[O-])no1)[N+](=O)[O-]	1.71645	8.24889	29.6628	68.3913	150.542	c1ncon1	Oxa-3
O=[N+]([O-])OCCN(c1cnnn1CO[N+](=O)[O-])[N+](=O)[O-]	1.70228	8.24844	28.4993	73.8705	160.965	c1c[nH]nn1	Tra-1
O=[N+]([O-])OCc1nn(CO[N+](=O)[O-])nc1CO[N+](=O)[O-]	1.72123	8.24749	28.526	65.6079	149.067	c1cn[nH]n1	Tra-2
O=[N+]([O-])OCCN(c1nn(CCO[N+](=O)[O-])c([N+](=O)[O-])c1[N+](=O)[O-])[N+](=O)[O-]	1.76204	8.24655	30.5722	105.14	191.014	c1cn[nH]c1	Pyr
O=[N+]([O-])OCCN(c1nn(CCO[N+](=O)[O-])nc1[N+](=O)[O-])[N+](=O)[O-]	1.72485	8.2461	29.1877	79.759	170.194	c1cn[nH]n1	Tra-2
CN(c1c(CO[N+](=O)[O-])nnn1CO[N+](=O)[O-])[N+](=O)[O-]	1.69474	8.24592	28.3763	76.105	154.298	c1c[nH]nn1	Tra-1
CN(c1c([N+](=O)[O-])c(CO[N+](=O)[O-])nn1CO[N+](=O)[O-])[N+](=O)[O-]	1.73472	8.24511	29.547	103.152	176.106	c1cn[nH]c1	Pyr
O=[N+]([O-])OCCN(c1c(CO[N+](=O)[O-])nc([N+](=O)[O-])n1CO[N+](=O)[O-])[N+](=O)[O-]	1.76422	8.24467	30.8108	106.009	186.593	c1c[nH]cn1	Imi
O=[N+]([O-])OCc1nc([N+](=O)[O-])n(CO[N+](=O)[O-])c1CO[N+](=O)[O-]	1.75241	8.24439	29.824	86.414	175.738	c1c[nH]cn1	Imi
O=[N+]([O-])OCCN(c1nncn1CO[N+](=O)[O-])[N+](=O)[O-]	1.69955	8.24438	28.344	75.5561	157.03	c1nnc[nH]1	Tra-3
CN(c1nc(N(CCO[N+](=O)[O-])[N+](=O)[O-])n(CO[N+](=O)[O-])c1[N+](=O)[O-])[N+](=O)[O-]	1.74357	8.24423	30.775	129.568	196.986	c1c[nH]cn1	Imi
CN(c1c(CO[N+](=O)[O-])c([N+](=O)[O-])nn1CO[N+](=O)[O-])[N+](=O)[O-]	1.7336	8.24339	29.6686	101.452	175.164	c1cn[nH]c1	Pyr
O=[N+]([O-])OCc1noc(CO[N+](=O)[O-])n1	1.72308	8.24107	28.4545	66.8056	158.612	c1ncon1	Oxa-3
Cn1nnc([N+](=O)[O-])n1	1.66689	8.23995	27.4473	79.4084	177.249	c1nn[nH]n1	Tet-2
O=[N+]([O-])OCCN(c1cn(CO[N+](=O)[O-])nn1)[N+](=O)[O-]	1.70723	8.23987	28.3299	69.4035	155.364	c1c[nH]nn1	Tra-1
O=[N+]([O-])OCCc1nn(CO[N+](=O)[O-])c([N+](=O)[O-])c1[N+](=O)[O-]	1.75137	8.23969	29.5572	92.3837	191.807	c1cn[nH]c1	Pyr
O=[N+]([O-])OCc1nnn(CO[N+](=O)[O-])c1CO[N+](=O)[O-]	1.72033	8.23784	28.4626	66.5571	150.541	c1c[nH]nn1	Tra-1
CN(c1nnoc1N(CCO[N+](=O)[O-])[N+](=O)[O-])[N+](=O)[O-]	1.71332	8.23728	29.7149	81.1819	172.381	c1conn1	Oxa-4
O=[N+]([O-])OCCN(c1c([N+](=O)[O-])nc([N+](=O)[O-])n1CCO[N+](=O)[O-])[N+](=O)[O-]	1.76088	8.23663	30.7513	106.585	193.239	c1c[nH]cn1	Imi
O=[N+]([O-])OCCN(c1nn(CO[N+](=O)[O-])cc1[N+](=O)[O-])[N+](=O)[O-]	1.74798	8.23658	29.7683	97.7157	183.337	c1cn[nH]c1	Pyr
O=[N+]([O-])OCCN(c1cnn(CO[N+](=O)[O-])n1)[N+](=O)[O-]	1.70573	8.23648	28.4305	71.067	159.268	c1cn[nH]n1	Tra-2
O=[N+]([O-])OCCN(c1nc([N+](=O)[O-])nn1CCO[N+](=O)[O-])[N+](=O)[O-]	1.72561	8.23631	29.1357	76.1854	166.27	c1nc[nH]n1	Tra-4
O=[N+]([O-])OCc1nonc1CO[N+](=O)[O-]	1.7281	8.23416	28.7368	56.7399	156.047	c1cnon1	Oxa-1
O=[N+]([O-])OCc1nnc(CO[N+](=O)[O-])n1CO[N+](=O)[O-]	1.71895	8.23213	28.3096	66.7031	149.692	c1nnc[nH]1	Tra-3
CN(c1nn(CO[N+](=O)[O-])nc1N(C)[N+](=O)[O-])[N+](=O)[O-]	1.67632	8.23191	28.2081	100.615	163.511	c1cn[nH]n1	Tra-2
CN(c1c(CO[N+](=O)[O-])nc([N+](=O)[O-])n1CO[N+](=O)[O-])[N+](=O)[O-]	1.72943	8.23121	29.5882	103.615	176.922	c1c[nH]cn1	Imi
O=[N+]([O-])OCCn1nc([N+](=O)[O-])c(CO[N+](=O)[O-])c1[N+](=O)[O-]	1.75606	8.22984	29.6863	94.6784	188.075	c1cn[nH]c1	Pyr
Cn1nnnc1[N+](=O)[O-]	1.65074	8.22916	27.6975	73.398	166.795	c1nnn[nH]1	Tet-1
O=[N+]([O-])OCCN(c1c([N+](=O)[O-])nnn1CCO[N+](=O)[O-])[N+](=O)[O-]	1.72281	8.22865	29.2688	82.0264	175.661	c1c[nH]nn1	Tra-1
O=[N+]([O-])OCc1nc(CO[N+](=O)[O-])n(CO[N+](=O)[O-])n1	1.72012	8.22712	28.3739	66.409	149.84	c1nc[nH]n1	Tra-4
O=[N+]([O-])OCCN(c1nnc([N+](=O)[O-])n1CCO[N+](=O)[O-])[N+](=O)[O-]	1.7203	8.22707	29.204	83.4308	177.369	c1nnc[nH]1	Tra-3
CN(c1nnn(CO[N+](=O)[O-])c1CO[N+](=O)[O-])[N+](=O)[O-]	1.68848	8.22549	28.1669	82.4755	160.554	c1c[nH]nn1	Tra-1
CN(c1nn(CO[N+](=O)[O-])c(N(C)[N+](=O)[O-])c1[N+](=O)[O-])[N+](=O)[O-]	1.71779	8.22541	29.4658	126.885	183.053	c1cn[nH]c1	Pyr
O=[N+]([O-])OCCc1nnn(CO[N+](=O)[O-])c1[N+](=O)[O-]	1.71263	8.22538	28.0836	82.5612	172.07	c1c[nH]nn1	Tra-1
CN(c1nc(CO[N+](=O)[O-])c([N+](=O)[O-])n1CO[N+](=O)[O-])[N+](=O)[O-]	1.735	8.22471	29.8076	103.114	176.083	c1c[nH]cn1	Imi
O=[N+]([O-])OCc1c([N+](=O)[O-])nn(CO[N+](=O)[O-])c1CO[N+](=O)[O-]	1.75677	8.22351	29.8625	91.1996	179.388	c1cn[nH]c1	Pyr
O=[N+]([O-])OCCc1nc([N+](=O)[O-])n(CO[N+](=O)[O-])n1	1.70367	8.22347	27.748	76.3589	172.526	c1nc[nH]n1	Tra-4
O=[N+]([O-])OCCN(c1nnc(CO[N+](=O)[O-])n1CO[N+](=O)[O-])[N+](=O)[O-]	1.73876	8.22337	29.5847	87.3427	167.853	c1nnc[nH]1	Tra-3
CN(c1nn(CO[N+](=O)[O-])c([N+](=O)[O-])c1CO[N+](=O)[O-])[N+](=O)[O-]	1.73121	8.22053	29.6574	108.458	182.461	c1cn[nH]c1	Pyr
O=[N+]([O-])OCCn1c([N+](=O)[O-])nc(CO[N+](=O)[O-])c1[N+](=O)[O-]	1.74532	8.21993	29.4649	92.916	194.196	c1c[nH]cn1	Imi
CN(c1nc(N(CCO[N+](=O)[O-])[N+](=O)[O-])n(CO[N+](=O)[O-])n1)[N+](=O)[O-]	1.71705	8.21943	29.7582	98.5153	163.94	c1nc[nH]n1	Tra-4
O=[N+]([O-])OCCn1nnc(CO[N+](=O)[O-])c1[N+](=O)[O-]	1.7062	8.21705	27.7736	79.5036	171.407	c1c[nH]nn1	Tra-1
O=[N+]([O-])OCCN(c1nc(CO[N+](=O)[O-])nn1CO[N+](=O)[O-])[N+](=O)[O-]	1.73904	8.21583	29.5459	85.555	162.455	c1nc[nH]n1	Tra-4
O=[N+]([O-])OCc1nnc(CO[N+](=O)[O-])o1	1.72089	8.21581	28.4313	73.7633	164.607	c1nnco1	Oxa-2
CN(c1nn(CO[N+](=O)[O-])c([N+](=O)[O-])c1N(C)[N+](=O)[O-])[N+](=O)[O-]	1.71506	8.21518	29.4131	129.342	184.048	c1cn[nH]c1	Pyr
CN(c1c([N+](=O)[O-])nn(CO[N+](=O)[O-])c1CO[N+](=O)[O-])[N+](=O)[O-]	1.72813	8.21377	29.4445	105.241	178.51	c1cn[nH]c1	Pyr
O=[N+]([O-])OCc1nc([N+](=O)[O-])c(CO[N+](=O)[O-])n1CO[N+](=O)[O-]	1.7573	8.21367	29.8182	92.1453	176.596	c1c[nH]cn1	Imi
CN(c1nnc(CO[N+](=O)[O-])n1CO[N+](=O)[O-])[N+](=O)[O-]	1.68722	8.21331	28.2645	82.1717	162.27	c1nnc[nH]1	Tra-3
O=[N+]([O-])OCCN(c1c([N+](=O)[O-])cnn1CO[N+](=O)[O-])[N+](=O)[O-]	1.74432	8.21128	30.0001	99.6393	193.533	c1cn[nH]c1	Pyr
Cn1nc([N+](=O)[O-])c(N(CCO[N+](=O)[O-])[N+](=O)[O-])c1[N+](=O)[O-]	1.71466	8.21069	29.2334	105.555	197.348	c1cn[nH]c1	Pyr
O=[N+]([O-])OCCN(c1c(CO[N+](=O)[O-])nn(CO[N+](=O)[O-])c1N(CCO[N+](=O)[O-])[N+](=O)[O-])[N+](=O)[O-]	1.75595	8.20973	30.2738	117.521	191.794	c1cn[nH]c1	Pyr
O=[N+]([O-])OCc1cnn(CO[N+](=O)[O-])c1[N+](=O)[O-]	1.72453	8.20924	28.6315	91.6122	185.024	c1cn[nH]c1	Pyr
O=[N+]([O-])OCCN(c1nc(N(CCO[N+](=O)[O-])[N+](=O)[O-])n(CO[N+](=O)[O-])c1N(CCO[N+](=O)[O-])[N+](=O)[O-])[N+](=O)[O-]	1.77928	8.20808	31.8794	144.526	213.153	c1c[nH]cn1	Imi
CN(c1noc(CO[N+](=O)[O-])n1)[N+](=O)[O-]	1.69571	8.20743	28.1982	66.8973	158.949	c1ncon1	Oxa-3
Cn1nc(N(CCO[N+](=O)[O-])[N+](=O)[O-])c([N+](=O)[O-])c1[N+](=O)[O-]	1.71628	8.2056	29.0874	117.275	193.202	c1cn[nH]c1	Pyr
CN(c1c([N+](=O)[O-])nn(CCO[N+](=O)[O-])c1[N+](=O)[O-])[N+](=O)[O-]	1.72608	8.20462	29.0643	112.742	188.396	c1cn[nH]c1	Pyr
CN(c1onnc1CO[N+](=O)[O-])[N+](=O)[O-]	1.69552	8.20452	28.2824	56.8053	152.758	c1conn1	Oxa-4
O=[N+]([O-])OCc1cc([N+](=O)[O-])n(CO[N+](=O)[O-])n1	1.73054	8.20382	28.6933	92.884	185.985	c1cn[nH]c1	Pyr
CN(c1nc(CO[N+](=O)[O-])n(CO[N+](=O)[O-])n1)[N+](=O)[O-]	1.69128	8.20341	28.3462	77.6183	156.066	c1nc[nH]n1	Tra-4
O=[N+]([O-])OCCN(c1cnno1)[N+](=O)[O-]	1.70558	8.20295	28.3088	52.9766	158.163	c1conn1	Oxa-4
O=[N+]([O-])OCCc1nn(CO[N+](=O)[O-])nc1[N+](=O)[O-]	1.70653	8.20226	27.8925	75.1629	174.887	c1cn[nH]n1	Tra-2
O=[N+]([O-])OCc1nnoc1CO[N+](=O)[O-]	1.72788	8.19918	28.7885	54.5223	161.058	c1conn1	Oxa-4
CN(c1nnn(CO[N+](=O)[O-])c1N(C)[N+](=O)[O-])[N+](=O)[O-]	1.67115	8.1988	28.2429	106.504	171.979	c1c[nH]nn1	Tra-1
O=[N+]([O-])OCCN(c1cnon1)[N+](=O)[O-]	1.70734	8.19765	28.3852	51.6534	156.894	c1cnon1	Oxa-1
O=[N+]([O-])OCCn1nc(CO[N+](=O)[O-])c([N+](=O)[O-])n1	1.70473	8.19683	27.6057	77.2747	171.048	c1cn[nH]n1	Tra-2
CN(c1nc(CO[N+](=O)[O-])no1)[N+](=O)[O-]	1.69997	8.19666	28.4343	53.4308	151.782	c1ncon1	Oxa-3
O=[N+]([O-])OCCN(c1ncno1)[N+](=O)[O-]	1.7079	8.19545	28.3855	43.3646	154.125	c1ncon1	Oxa-3
CN(c1nn(CO[N+](=O)[O-])c(CO[N+](=O)[O-])c1[N+](=O)[O-])[N+](=O)[O-]	1.73011	8.19485	29.4061	108.822	182.824	c1cn[nH]c1	Pyr
Cn1c(N(CCO[N+](=O)[O-])[N+](=O)[O-])nc([N+](=O)[O-])c1[N+](=O)[O-]	1.7185	8.19346	28.859	115.786	191.562	c1c[nH]cn1	Imi
O=[N+]([O-])OCCN(c1conn1)[N+](=O)[O-]	1.70733	8.19321	28.3585	52.4282	158.551	c1conn1	Oxa-4
O=[N+]([O-])OCc1ncn(CO[N+](=O)[O-])c1[N+](=O)[O-]	1.72763	8.19201	28.5715	93.9527	184.012	c1c[nH]cn1	Imi
CN(c1nc(N(C)[N+](=O)[O-])n(CO[N+](=O)[O-])n1)[N+](=O)[O-]	1.6793	8.1893	28.3805	97.3145	157.631	c1nc[nH]n1	Tra-4
CN(c1nc(CO[N+](=O)[O-])n(CO[N+](=O)[O-])c1[N+](=O)[O-])[N+](=O)[O-]	1.72677	8.18924	29.4218	110.816	185.166	c1c[nH]cn1	Imi
CN(c1nn(CCO[N+](=O)[O-])c([N+](=O)[O-])c1[N+](=O)[O-])[N+](=O)[O-]	1.72952	8.18904	29.104	111.559	186.13	c1cn[nH]c1	Pyr
O=[N+]([O-])OCCN(c1ncon1)[N+](=O)[O-]	1.70888	8.18885	28.4575	48.6718	157.21	c1ncon1	Oxa-3
CN(c1nc(CO[N+](=O)[O-])nn1CO[N+](=O)[O-])[N+](=O)[O-]	1.69126	8.18859	28.3771	78.8367	156.592	c1nc[nH]n1	Tra-4
O=[N+]([O-])OCCc1nc([N+](=O)[O-])c([N+](=O)[O-])n1CO[N+](=O)[O-]	1.7486	8.18835	29.4666	91.362	191.684	c1c[nH]cn1	Imi
CN(c1nnc(CO[N+](=O)[O-])o1)[N+](=O)[O-]	1.69468	8.1879	28.1927	59.4673	157.815	c1nnco1	Oxa-2
O=[N+]([O-])OCCN(c1cc([N+](=O)[O-])nn1CO[N+](=O)[O-])[N+](=O)[O-]	1.73595	8.18621	29.7792	108.655	203.215	c1cn[nH]c1	Pyr
CN(c1nc([N+](=O)[O-])n(CO[N+](=O)[O-])c1N(C)[N+](=O)[O-])[N+](=O)[O-]	1.71166	8.18481	29.2813	132.513	181.857	c1c[nH]cn1	Imi
CN(c1nc([N+](=O)[O-])n(CCO[N+](=O)[O-])c1[N+](=O)[O-])[N+](=O)[O-]	1.71924	8.18414	29.0948	114.443	195.101	c1c[nH]cn1	Imi
O=[N+]([O-])OCCn1nc(CO[N+](=O)[O-])c([N+](=O)[O-])c1[N+](=O)[O-]	1.75232	8.18353	29.5966	91.5767	191.37	c1cn[nH]c1	Pyr
CN(c1nnoc1CO[N+](=O)[O-])[N+](=O)[O-]	1.69545	8.18251	28.3717	55.3716	151.112	c1conn1	Oxa-4
CN(c1nnn(CCO[N+](=O)[O-])c1[N+](=O)[O-])[N+](=O)[O-]	1.67669	8.18185	27.5061	96.9779	176.022	c1c[nH]nn1	Tra-1
CN(c1noc(N(C)[N+](=O)[O-])n1)[N+](=O)[O-]	1.68383	8.18123	28.0034	71.9181	154.048	c1ncon1	Oxa-3
CN(c1nc([N+](=O)[O-])n(CO[N+](=O)[O-])c1CO[N+](=O)[O-])[N+](=O)[O-]	1.72802	8.1812	29.6967	108.527	177.215	c1c[nH]cn1	Imi
O=[N+]([O-])OCc1cn(CO[N+](=O)[O-])c([N+](=O)[O-])n1	1.72282	8.18115	28.4119	89.2799	185.661	c1c[nH]cn1	Imi
CN(c1c(CO[N+](=O)[O-])nn(CO[N+](=O)[O-])c1[N+](=O)[O-])[N+](=O)[O-]	1.72907	8.18019	29.6614	110.18	182.72	c1cn[nH]c1	Pyr
CN(c1nn(CCO[N+](=O)[O-])nc1[N+](=O)[O-])[N+](=O)[O-]	1.68643	8.17925	27.4746	90.6489	169.904	c1cn[nH]n1	Tra-2
O=[N+]([O-])OCCN(c1nc([N+](=O)[O-])cn1CO[N+](=O)[O-])[N+](=O)[O-]	1.74303	8.17837	29.8654	101.514	187.517	c1c[nH]cn1	Imi
O=[N+]([O-])OCCn1c(CO[N+](=O)[O-])nc([N+](=O)[O-])c1[N+](=O)[O-]	1.74403	8.1772	29.1757	93.5766	195.804	c1c[nH]cn1	Imi
O=[N+]([O-])OCCc1nnc([N+](=O)[O-])n1CO[N+](=O)[O-]	1.70841	8.17693	28.0158	72.0014	171.994	c1nnc[nH]1	Tra-3
CN(c1nn(CO[N+](=O)[O-])nc1CO[N+](=O)[O-])[N+](=O)[O-]	1.68905	8.17668	28.3989	84.5646	158.114	c1cn[nH]n1	Tra-2
CN(c1nc(N(CCO[N+](=O)[O-])[N+](=O)[O-])n(CO[N+](=O)[O-])c1N(CCO[N+](=O)[O-])[N+](=O)[O-])[N+](=O)[O-]	1.73252	8.1763	30.6991	133.294	207.997	c1c[nH]cn1	Imi
O=[N+]([O-])OCCn1nc(CO[N+](=O)[O-])nc1[N+](=O)[O-]	1.70398	8.17567	27.8345	76.282	175.037	c1nc[nH]n1	Tra-4
O=[N+]([O-])OCCn1nc([N+](=O)[O-])c([N+](=O)[O-])c1CO[N+](=O)[O-]	1.74651	8.1753	29.3269	90.6953	190.909	c1cn[nH]c1	Pyr
O=[N+]([O-])OCCN(c1nn(CO[N+](=O)[O-])c(N(CCO[N+](=O)[O-])[N+](=O)[O-])c1CO[N+](=O)[O-])[N+](=O)[O-]	1.76121	8.17404	30.2789	102.706	176.505	c1cn[nH]c1	Pyr
O=[N+]([O-])OCCN(c1c([N+](=O)[O-])c([N+](=O)[O-])nn1CCO[N+](=O)[O-])[N+](=O)[O-]	1.75382	8.17369	30.2768	111.293	200.658	c1cn[nH]c1	Pyr
CN(c1nonc1CO[N+](=O)[O-])[N+](=O)[O-]	1.69269	8.17319	28.3546	55.4332	150.825	c1cnon1	Oxa-1
O=[N+]([O-])OCCc1c([N+](=O)[O-])nc([N+](=O)[O-])n1CO[N+](=O)[O-]	1.74831	8.17318	29.5391	100.161	199.591	c1c[nH]cn1	Imi
CN(c1cnn(CO[N+](=O)[O-])c1[N+](=O)[O-])[N+](=O)[O-]	1.70432	8.17309	28.3284	106.034	186.372	c1cn[nH]c1	Pyr
Cn1nc(N(CCO[N+](=O)[O-])[N+](=O)[O-])nc1[N+](=O)[O-]	1.68041	8.17292	27.71	91.0487	173.425	c1nc[nH]n1	Tra-4
Cn1nnc(N(CCO[N+](=O)[O-])[N+](=O)[O-])c1[N+](=O)[O-]	1.68718	8.17	28.0537	85.5548	168.016	c1c[nH]nn1	Tra-1
Cn1c(N(CCO[N+](=O)[O-])[N+](=O)[O-])nnc1[N+](=O)[O-]	1.68618	8.16732	27.7656	89.8286	170.225	c1nnc[nH]1	Tra-3
O=[N+]([O-])OCCN(c1nnco1)[N+](=O)[O-]	1.70237	8.1662	28.3047	53.2751	161.819	c1nnco1	Oxa-2
O=[N+]([O-])OCCc1c([N+](=O)[O-])c([N+](=O)[O-])nn1CO[N+](=O)[O-]	1.74197	8.165	29.1148	97.6831	201.388	c1cn[nH]c1	Pyr
Cn1nc([N+](=O)[O-])c([N+](=O)[O-])c1N(CCO[N+](=O)[O-])[N+](=O)[O-]	1.71065	8.165	29.0743	115.793	196.604	c1cn[nH]c1	Pyr
Cn1c([N+](=O)[O-])nc(N(CCO[N+](=O)[O-])[N+](=O)[O-])c1[N+](=O)[O-]	1.72662	8.16323	29.3173	112.28	188.312	c1c[nH]cn1	Imi
CN(c1c([N+](=O)[O-])nc(CO[N+](=O)[O-])n1CO[N+](=O)[O-])[N+](=O)[O-]	1.72474	8.16285	29.376	111.57	181.751	c1c[nH]cn1	Imi
O=[N+]([O-])OCCc1nnoc1[N+](=O)[O-]	1.71107	8.16121	27.5968	63.8395	181.693	c1conn1	Oxa-4
O=[N+]([O-])OCCN(c1nc([N+](=O)[O-])c(N(CCO[N+](=O)[O-])[N+](=O)[O-])n1CCO[N+](=O)[O-])[N+](=O)[O-]	1.7412	8.16114	29.9951	107.738	185.506	c1c[nH]cn1	Imi
CN(c1nn(CO[N+](=O)[O-])cc1[N+](=O)[O-])[N+](=O)[O-]	1.70389	8.15828	28.1436	104.452	184.307	c1cn[nH]c1	Pyr
O=[N+]([O-])OCCn1c([N+](=O)[O-])nc([N+](=O)[O-])c1CO[N+](=O)[O-]	1.74522	8.15774	29.4295	98.6313	197.038	c1c[nH]cn1	Imi
CN(c1nc(N(C)[N+](=O)[O-])n(CO[N+](=O)[O-])c1[N+](=O)[O-])[N+](=O)[O-]	1.7054	8.15726	29.4082	137.103	198.807	c1c[nH]cn1	Imi
O=[N+]([O-])OCCc1nnn(CO[N+](=O)[O-])n1	1.66247	8.15675	26.3344	52.0762	146.529	c1nn[nH]n1	Tet-2
O=[N+]([O-])OCCN(c1ncn(CO[N+](=O)[O-])c1N(CCO[N+](=O)[O-])[N+](=O)[O-])[N+](=O)[O-]	1.73203	8.15649	29.272	93.1299	174.341	c1c[nH]cn1	Imi
CN(c1nc(N(CCO[N+](=O)[O-])[N+](=O)[O-])c(N(CCO[N+](=O)[O-])[N+](=O)[O-])n1CO[N+](=O)[O-])[N+](=O)[O-]	1.73007	8.15638	30.6657	144.277	218.171	c1c[nH]cn1	Imi
O=[N+]([O-])OCc1ncc([N+](=O)[O-])n1CO[N+](=O)[O-]	1.72225	8.15603	28.6101	89.5678	195.407	c1c[nH]cn1	Imi
CN(c1nc([N+](=O)[O-])c(CO[N+](=O)[O-])n1CO[N+](=O)[O-])[N+](=O)[O-]	1.72763	8.15524	29.5892	111.036	179.342	c1c[nH]cn1	Imi
Cn1nc(N(CCO[N+](=O)[O-])[N+](=O)[O-])c([N+](=O)[O-])n1	1.68237	8.15489	27.9448	84.7138	167.019	c1cn[nH]n1	Tra-2
CN(c1ncn(CO[N+](=O)[O-])c1[N+](=O)[O-])[N+](=O)[O-]	1.69912	8.15392	28.0885	105.434	186.567	c1c[nH]cn1	Imi
CN(c1c([N+](=O)[O-])nn(CO[N+](=O)[O-])c1N(C)[N+](=O)[O-])[N+](=O)[O-]	1.70342	8.1534	29.0743	139.062	195.742	c1cn[nH]c1	Pyr
O=[N+]([O-])OCc1cn(CO[N+](=O)[O-])nc1[N+](=O)[O-]	1.72478	8.15333	28.6127	85.616	187.703	c1cn[nH]c1	Pyr
CN(c1c([N+](=O)[O-])cnn1CO[N+](=O)[O-])[N+](=O)[O-]	1.7041	8.15175	28.2413	100.144	184.58	c1cn[nH]c1	Pyr
CN(c1c([N+](=O)[O-])c([N+](=O)[O-])nn1CCO[N+](=O)[O-])[N+](=O)[O-]	1.72224	8.15149	28.7756	112.634	187.645	c1cn[nH]c1	Pyr
CN(c1nc([N+](=O)[O-])n(CCO[N+](=O)[O-])n1)[N+](=O)[O-]	1.68582	8.14997	27.6632	89.0999	169.664	c1nc[nH]n1	Tra-4
Cc1c([N+](=O)[O-])nn(CO[N+](=O)[O-])c1[N+](=O)[O-]	1.7111	8.14908	28.2847	100.273	204.154	c1cn[nH]c1	Pyr
O=[N+]([O-])OCCn1nnc([N+](=O)[O-])c1CO[N+](=O)[O-]	1.70418	8.14889	27.818	74.411	174.761	c1c[nH]nn1	Tra-1
O=[N+]([O-])OCc1nn(CO[N+](=O)[O-])cc1[N+](=O)[O-]	1.73141	8.14798	28.7615	84.8239	186.928	c1cn[nH]c1	Pyr
CN(c1c([N+](=O)[O-])nnn1CCO[N+](=O)[O-])[N+](=O)[O-]	1.68422	8.14739	27.5465	87.8566	168.52	c1c[nH]nn1	Tra-1
O=[N+]([O-])OCCN(c1nn(CCO[N+](=O)[O-])c([N+](=O)[O-])c1N(CCO[N+](=O)[O-])[N+](=O)[O-])[N+](=O)[O-]	1.73925	8.14733	30.2258	131.142	210.393	c1cn[nH]c1	Pyr
O=[N+]([O-])OCc1ncn(CO[N+](=O)[O-])n1	1.66977	8.14526	26.4071	77.122	157.94	c1nc[nH]n1	Tra-4
O=[N+]([O-])OCCc1nonc1[N+](=O)[O-]	1.71074	8.14393	27.7254	58.8941	183.877	c1cnon1	Oxa-1
O=[N+]([O-])OCCc1nnnn1CO[N+](=O)[O-]	1.65532	8.14259	26.036	56.749	149.75	c1nnn[nH]1	Tet-1
O=[N+]([O-])OCCc1noc([N+](=O)[O-])n1	1.70643	8.14197	27.3651	67.4855	186.098	c1ncon1	Oxa-3
O=[N+]([O-])OCCn1nnc(CO[N+](=O)[O-])n1	1.6599	8.14188	25.8802	67.0261	150.28	c1nn[nH]n1	Tet-2
O=[N+]([O-])OCCc1onnc1[N+](=O)[O-]	1.71867	8.14178	27.9078	61.6113	183.261	c1conn1	Oxa-4
CN(c1nnc(N(C)[N+](=O)[O-])o1)[N+](=O)[O-]	1.67738	8.14159	27.873	69.695	150.238	c1nnco1	Oxa-2
Cn1nc([N+](=O)[O-])nc1N(CCO[N+](=O)[O-])[N+](=O)[O-]	1.67526	8.14092	27.4937	92.8655	171.934	c1nc[nH]n1	Tra-4
O=[N+]([O-])OCCn1nc([N+](=O)[O-])nc1CO[N+](=O)[O-]	1.7044	8.14089	27.8738	73.6601	171.757	c1nc[nH]n1	Tra-4
O=[N+]([O-])OCCc1nnc([N+](=O)[O-])o1	1.71775	8.14018	27.5423	68.3162	187.293	c1nnco1	Oxa-2
CN(c1nnc(N(C)[N+](=O)[O-])n1CO[N+](=O)[O-])[N+](=O)[O-]	1.67002	8.13947	28.1884	107.236	161.847	c1nnc[nH]1	Tra-3
O=[N+]([O-])OCc1nc([N+](=O)[O-])cn1CO[N+](=O)[O-]	1.72404	8.13822	28.5447	87.4973	190.22	c1c[nH]cn1	Imi
CN(c1nnn(CCO[N+](=O)[O-])n1)[N+](=O)[O-]	1.64041	8.13819	25.7884	70.2723	151.59	c1nn[nH]n1	Tet-2
O=[N+]([O-])OCc1cnn(CO[N+](=O)[O-])n1	1.67571	8.13814	26.9149	64.9235	159.281	c1cn[nH]n1	Tra-2
O=[N+]([O-])OCc1c([N+](=O)[O-])ncn1CO[N+](=O)[O-]	1.71597	8.13782	28.2668	89.4972	194.505	c1c[nH]cn1	Imi
O=[N+]([O-])OCc1cnc([N+](=O)[O-])n1CO[N+](=O)[O-]	1.71787	8.13748	28.7204	91.2831	195.671	c1c[nH]cn1	Imi
CN(c1cn(CO[N+](=O)[O-])nc1[N+](=O)[O-])[N+](=O)[O-]	1.70018	8.13545	27.9961	103.459	185.458	c1cn[nH]c1	Pyr
O=[N+]([O-])OCCc1nc([N+](=O)[O-])nn1CO[N+](=O)[O-]	1.69845	8.13533	27.7692	83.8699	180.404	c1nc[nH]n1	Tra-4
CN(c1c([N+](=O)[O-])nc([N+](=O)[O-])n1CCO[N+](=O)[O-])[N+](=O)[O-]	1.71678	8.13346	28.622	124.543	199.561	c1c[nH]cn1	Imi
O=[N+]([O-])OCCc1c([N+](=O)[O-])nnn1CO[N+](=O)[O-]	1.70366	8.13233	28.0296	78.681	177.843	c1c[nH]nn1	Tra-1
O=[N+]([O-])OCCN(c1cnn(CO[N+](=O)[O-])c1N(CCO[N+](=O)[O-])[N+](=O)[O-])[N+](=O)[O-]	1.73052	8.13149	29.3917	103.744	186.31	c1cn[nH]c1	Pyr
Cn1nnc([N+](=O)[O-])c1N(CCO[N+](=O)[O-])[N+](=O)[O-]	1.67318	8.12945	27.795	90.7725	178.467	c1c[nH]nn1	Tra-1
CN(c1nnoc1N(C)[N+](=O)[O-])[N+](=O)[O-]	1.66512	8.12795	27.6558	74.2041	150.906	c1conn1	Oxa-4
CN(c1nc([N+](=O)[O-])c(N(C)[N+](=O)[O-])n1CO[N+](=O)[O-])[N+](=O)[O-]	1.70465	8.12762	28.9849	141.27	186.18	c1c[nH]cn1	Imi
O=[N+]([O-])OCc1c([N+](=O)[O-])cnn1CO[N+](=O)[O-]	1.71974	8.12449	28.5143	91.19	199.945	c1cn[nH]c1	Pyr
CN(c1c(N(CCO[N+](=O)[O-])[N+](=O)[O-])nc(N(CCO[N+](=O)[O-])[N+](=O)[O-])n1CO[N+](=O)[O-])[N+](=O)[O-]	1.72995	8.12357	30.708	146.646	221.23	c1c[nH]cn1	Imi
O=[N+]([O-])OCCn1ncc([N+](=O)[O-])c1[N+](=O)[O-]	1.71456	8.12282	27.692	104.783	208.299	c1cn[nH]c1	Pyr
O=[N+]([O-])OCCc1nc([N+](=O)[O-])no1	1.72622	8.12223	28.0177	67.1636	187.613	c1ncon1	Oxa-3
O=[N+]([O-])OCc1cc([N+](=O)[O-])nn1CO[N+](=O)[O-]	1.72112	8.12181	28.7629	91.0608	194.796	c1cn[nH]c1	Pyr
Cn1nnnc1N(CCO[N+](=O)[O-])[N+](=O)[O-]	1.62738	8.12138	26.0008	66.2575	149.978	c1nnn[nH]1	Tet-1
CN(c1cnn(CO[N+](=O)[O-])n1)[N+](=O)[O-]	1.65493	8.12122	26.621	81.4169	163.006	c1cn[nH]n1	Tra-2
CN(c1nc([N+](=O)[O-])c([N+](=O)[O-])n1CCO[N+](=O)[O-])[N+](=O)[O-]	1.72007	8.11904	28.9227	116.469	188.848	c1c[nH]cn1	Imi
CN(c1cn(CO[N+](=O)[O-])c([N+](=O)[O-])n1)[N+](=O)[O-]	1.69678	8.11899	28.0911	105.487	188.704	c1c[nH]cn1	Imi
Cc1nn(CO[N+](=O)[O-])c([N+](=O)[O-])c1[N+](=O)[O-]	1.70969	8.1178	28.2537	104.451	203.091	c1cn[nH]c1	Pyr
O=[N+]([O-])OCCN(c1cnc(N(CCO[N+](=O)[O-])[N+](=O)[O-])n1CO[N+](=O)[O-])[N+](=O)[O-]	1.73251	8.11761	29.2541	102.21	183.615	c1c[nH]cn1	Imi
CN(c1nn(CO[N+](=O)[O-])c(N(CCO[N+](=O)[O-])[N+](=O)[O-])c1N(CCO[N+](=O)[O-])[N+](=O)[O-])[N+](=O)[O-]	1.73267	8.1149	30.3744	151.024	221.298	c1cn[nH]c1	Pyr
CN(c1nc([N+](=O)[O-])nn1CCO[N+](=O)[O-])[N+](=O)[O-]	1.6831	8.11478	27.6402	90.8956	166.62	c1nc[nH]n1	Tra-4
O=[N+]([O-])OCCN(c1nc(CO[N+](=O)[O-])n(CO[N+](=O)[O-])c1N(CCO[N+](=O)[O-])[N+](=O)[O-])[N+](=O)[O-]	1.76039	8.11454	30.234	110.598	182.885	c1c[nH]cn1	Imi
O=[N+]([O-])OCCn1c(CO[N+](=O)[O-])nnc1[N+](=O)[O-]	1.70147	8.11418	28.1866	81.8748	175.838	c1nnc[nH]1	Tra-3
O=[N+]([O-])OCc1nncn1CO[N+](=O)[O-]	1.67004	8.11405	26.6283	64.9251	160.402	c1nnc[nH]1	Tra-3
O=[N+]([O-])OCCN(c1nc(CO[N+](=O)[O-])c(N(CCO[N+](=O)[O-])[N+](=O)[O-])n1CO[N+](=O)[O-])[N+](=O)[O-]	1.76205	8.11394	30.3561	107.549	178.853	c1c[nH]cn1	Imi
CN(c1cc([N+](=O)[O-])nn1CO[N+](=O)[O-])[N+](=O)[O-]	1.69616	8.11333	28.1085	107.291	191.462	c1cn[nH]c1	Pyr
O=[N+]([O-])OCCn1nnnc1CO[N+](=O)[O-]	1.65863	8.11026	26.1692	49.9964	147.228	c1nnn[nH]1	Tet-1
O=[N+]([O-])OCc1cnnn1CO[N+](=O)[O-]	1.67533	8.10918	27.0765	58.7084	161.438	c1c[nH]nn1	Tra-1
O=[N+]([O-])OCCN(c1c(CO[N+](=O)[O-])c(CO[N+](=O)[O-])nn1CO[N+](=O)[O-])[N+](=O)[O-]	1.74184	8.10907	28.9236	86.9186	163.203	c1cn[nH]c1	Pyr
CN(c1nc([N+](=O)[O-])cn1CO[N+](=O)[O-])[N+](=O)[O-]	1.70225	8.10791	28.1991	102.956	188.077	c1c[nH]cn1	Imi
O=[N+]([O-])OCCn1nc([N+](=O)[O-])cc1[N+](=O)[O-]	1.71823	8.10623	27.8596	96.8152	212.151	c1cn[nH]c1	Pyr
CN(c1ncn(CO[N+](=O)[O-])n1)[N+](=O)[O-]	1.65696	8.10613	26.4498	80.048	162.29	c1nc[nH]n1	Tra-4
CN(c1cc([N+](=O)[O-])n(CO[N+](=O)[O-])n1)[N+](=O)[O-]	1.70134	8.1059	28.4733	106.439	189.854	c1cn[nH]c1	Pyr
O=[N+]([O-])OCCN(c1nc([N+](=O)[O-])n(CCO[N+](=O)[O-])c1N(CCO[N+](=O)[O-])[N+](=O)[O-])[N+](=O)[O-]	1.73705	8.10386	30.2155	109.747	190.991	c1c[nH]cn1	Imi
Cn1nc(N(CCO[N+](=O)[O-])[N+](=O)[O-])c([N+](=O)[O-])c1N(CCO[N+](=O)[O-])[N+](=O)[O-]	1.69722	8.10356	28.5567	122.173	194.924	c1cn[nH]c1	Pyr
O=[N+]([O-])OCCc1c([N+](=O)[O-])nc(N(CCO[N+](=O)[O-])[N+](=O)[O-])n1CO[N+](=O)[O-]	1.717	8.10286	28.6443	95.7413	179.057	c1c[nH]cn1	Imi
CN(c1nnc([N+](=O)[O-])n1CCO[N+](=O)[O-])[N+](=O)[O-]	1.67669	8.1022	27.6427	96.1923	174.062	c1nnc[nH]1	Tra-3
O=[N+]([O-])OCc1cn(CO[N+](=O)[O-])nn1	1.6744	8.10212	26.9989	59.8716	161.512	c1c[nH]nn1	Tra-1
O=[N+]([O-])OCCN(c1nc(N(CCO[N+](=O)[O-])[N+](=O)[O-])n(CO[N+](=O)[O-])c1CO[N+](=O)[O-])[N+](=O)[O-]	1.76137	8.10138	30.2166	108.382	178.526	c1c[nH]cn1	Imi
O=[N+]([O-])OCCn1cnc([N+](=O)[O-])c1[N+](=O)[O-]	1.71123	8.10102	27.4919	103.421	205.91	c1c[nH]cn1	Imi
O=[N+]([O-])OCCc1nc([N+](=O)[O-])c(N(CCO[N+](=O)[O-])[N+](=O)[O-])n1CO[N+](=O)[O-]	1.72402	8.09884	28.4153	89.0822	173.364	c1c[nH]cn1	Imi
CN(c1cn(CO[N+](=O)[O-])nn1)[N+](=O)[O-]	1.65128	8.09804	26.4796	82.3058	163.764	c1c[nH]nn1	Tra-1
O=[N+]([O-])OCCn1cc([N+](=O)[O-])c([N+](=O)[O-])n1	1.71577	8.09773	27.5159	95.1592	206.668	c1cn[nH]c1	Pyr
CN(c1cnc([N+](=O)[O-])n1CO[N+](=O)[O-])[N+](=O)[O-]	1.69377	8.09702	28.2123	110.219	190.183	c1c[nH]cn1	Imi
Cn1nnc(N(CCO[N+](=O)[O-])[N+](=O)[O-])n1	1.63113	8.09489	26.3511	58.4896	143.996	c1nn[nH]n1	Tet-2
CN(c1ncc([N+](=O)[O-])n1CO[N+](=O)[O-])[N+](=O)[O-]	1.69632	8.09389	28.3007	105.981	193.957	c1c[nH]cn1	Imi
O=[N+]([O-])OCCN(c1c([N+](=O)[O-])c(CO[N+](=O)[O-])nn1CCO[N+](=O)[O-])[N+](=O)[O-]	1.73388	8.09294	28.7024	90.4303	172.432	c1cn[nH]c1	Pyr
O=[N+]([O-])OCCN(c1c(CO[N+](=O)[O-])nc(CO[N+](=O)[O-])n1CO[N+](=O)[O-])[N+](=O)[O-]	1.73841	8.09277	28.6514	97.5582	174.191	c1c[nH]cn1	Imi
O=[N+]([O-])OCCN(c1c([N+](=O)[O-])nn(CCO[N+](=O)[O-])c1N(CCO[N+](=O)[O-])[N+](=O)[O-])[N+](=O)[O-]	1.74193	8.09209	30.0292	114.085	191.4	c1cn[nH]c1	Pyr
O=[N+]([O-])OCCN(c1nn(CCO[N+](=O)[O-])c(N(CCO[N+](=O)[O-])[N+](=O)[O-])c1[N+](=O)[O-])[N+](=O)[O-]	1.75452	8.09055	30.0607	109.762	180.913	c1cn[nH]c1	Pyr
CN(c1nnnn1CCO[N+](=O)[O-])[N+](=O)[O-]	1.62474	8.09014	25.6793	73.8076	155.791	c1nnn[nH]1	Tet-1
O=[N+]([O-])OCCN(c1nn(CCO[N+](=O)[O-])nc1N(CCO[N+](=O)[O-])[N+](=O)[O-])[N+](=O)[O-]	1.71746	8.08971	28.8137	99.8373	188.653	c1cn[nH]n1	Tra-2
CN(c1c(N(CCO[N+](=O)[O-])[N+](=O)[O-])nn(CO[N+](=O)[O-])c1CO[N+](=O)[O-])[N+](=O)[O-]	1.71123	8.08845	28.9545	109.281	186.667	c1cn[nH]c1	Pyr
Cn1c(N(CCO[N+](=O)[O-])[N+](=O)[O-])nc(N(CCO[N+](=O)[O-])[N+](=O)[O-])c1[N+](=O)[O-]	1.70018	8.08812	28.6017	115.671	190.117	c1c[nH]cn1	Imi
CN(c1ncnn1CO[N+](=O)[O-])[N+](=O)[O-]	1.65179	8.08675	26.6632	71.4396	161.086	c1nc[nH]n1	Tra-4
O=[N+]([O-])OCCN(c1nn(CO[N+](=O)[O-])c(CO[N+](=O)[O-])c1N(CCO[N+](=O)[O-])[N+](=O)[O-])[N+](=O)[O-]	1.75975	8.0859	30.1403	118.865	191.996	c1cn[nH]c1	Pyr
O=[N+]([O-])OCCn1c([N+](=O)[O-])cnc1[N+](=O)[O-]	1.71432	8.08548	28.01	95.3622	216.219	c1c[nH]cn1	Imi
Cc1nc([N+](=O)[O-])c([N+](=O)[O-])n1CO[N+](=O)[O-]	1.70017	8.08436	27.929	101.687	203.571	c1c[nH]cn1	Imi
Cc1c([N+](=O)[O-])nc([N+](=O)[O-])n1CO[N+](=O)[O-]	1.70996	8.08431	28.1843	106.861	205.651	c1c[nH]cn1	Imi
CN(c1c([N+](=O)[O-])ncn1CO[N+](=O)[O-])[N+](=O)[O-]	1.68816	8.08326	27.8417	106.777	194.765	c1c[nH]cn1	Imi
O=[N+]([O-])OCCN(c1nc(N(CCO[N+](=O)[O-])[N+](=O)[O-])n(CCO[N+](=O)[O-])c1[N+](=O)[O-])[N+](=O)[O-]	1.74646	8.08306	29.925	118.381	193.41	c1c[nH]cn1	Imi
CN(c1c(N(CCO[N+](=O)[O-])[N+](=O)[O-])c(N(CCO[N+](=O)[O-])[N+](=O)[O-])nn1CO[N+](=O)[O-])[N+](=O)[O-]	1.73817	8.0791	30.2751	136.204	197.622	c1cn[nH]c1	Pyr
CN(c1cnnn1CO[N+](=O)[O-])[N+](=O)[O-]	1.64822	8.07853	26.6153	72.7893	161.916	c1c[nH]nn1	Tra-1
O=[N+]([O-])OCCn1cc([N+](=O)[O-])nc1[N+](=O)[O-]	1.70833	8.07722	27.5018	99.1544	215.93	c1c[nH]cn1	Imi
Cn1c([N+](=O)[O-])nc([N+](=O)[O-])c1N(CCO[N+](=O)[O-])[N+](=O)[O-]	1.706	8.07686	29.3367	118.856	212.291	c1c[nH]cn1	Imi
CN(c1nc(CO[N+](=O)[O-])n(CO[N+](=O)[O-])c1N(CCO[N+](=O)[O-])[N+](=O)[O-])[N+](=O)[O-]	1.71416	8.07589	28.8946	105.216	180.291	c1c[nH]cn1	Imi
CN(c1c(N(CCO[N+](=O)[O-])[N+](=O)[O-])nn(CCO[N+](=O)[O-])c1[N+](=O)[O-])[N+](=O)[O-]	1.70841	8.07585	28.6435	110.16	184.748	c1cn[nH]c1	Pyr
Cc1c([N+](=O)[O-])c([N+](=O)[O-])nn1CO[N+](=O)[O-]	1.70005	8.07581	27.8135	102.011	204.387	c1cn[nH]c1	Pyr
Cn1nc(CO[N+](=O)[O-])c([N+](=O)[O-])c1[N+](=O)[O-]	1.70722	8.07419	28.0482	101.412	202.259	c1cn[nH]c1	Pyr
O=[N+]([O-])OCCN(c1nnc(N(CCO[N+](=O)[O-])[N+](=O)[O-])n1CCO[N+](=O)[O-])[N+](=O)[O-]	1.72211	8.07276	28.6428	90.6269	176.222	c1nnc[nH]1	Tra-3
Cn1c(CO[N+](=O)[O-])nc([N+](=O)[O-])c1[N+](=O)[O-]	1.71132	8.07263	27.9808	105.202	200.984	c1c[nH]cn1	Imi
O=[N+]([O-])OCCN(c1nnn(CCO[N+](=O)[O-])c1N(CCO[N+](=O)[O-])[N+](=O)[O-])[N+](=O)[O-]	1.72181	8.07169	28.8243	89.8068	177.501	c1c[nH]nn1	Tra-1
CN(c1nc(N(CCO[N+](=O)[O-])[N+](=O)[O-])c(N(C)[N+](=O)[O-])n1CO[N+](=O)[O-])[N+](=O)[O-]	1.68855	8.07102	29.0199	147.89	217.829	c1c[nH]cn1	Imi
Cn1nc([N+](=O)[O-])c([N+](=O)[O-])c1CO[N+](=O)[O-]	1.70434	8.07093	27.819	103.782	201.281	c1cn[nH]c1	Pyr
CN(c1c(N(CCO[N+](=O)[O-])[N+](=O)[O-])c(CO[N+](=O)[O-])nn1CO[N+](=O)[O-])[N+](=O)[O-]	1.7158	8.07092	28.917	105.694	179.739	c1cn[nH]c1	Pyr
O=[N+]([O-])OCCN(c1nc(CO[N+](=O)[O-])n(CCO[N+](=O)[O-])c1[N+](=O)[O-])[N+](=O)[O-]	1.72055	8.06864	28.69	93.9134	180.755	c1c[nH]cn1	Imi
Cn1nnc(N(CCO[N+](=O)[O-])[N+](=O)[O-])c1N(CCO[N+](=O)[O-])[N+](=O)[O-]	1.66859	8.06787	27.3873	87.6143	173.334	c1c[nH]nn1	Tra-1
CN(c1nc(N(CCO[N+](=O)[O-])[N+](=O)[O-])c([N+](=O)[O-])n1CCO[N+](=O)[O-])[N+](=O)[O-]	1.69369	8.06692	28.4466	124.694	200.407	c1c[nH]cn1	Imi
Cn1c([N+](=O)[O-])nc(CO[N+](=O)[O-])c1[N+](=O)[O-]	1.71019	8.06562	28.2167	104.712	202.848	c1c[nH]cn1	Imi
O=[N+]([O-])OCCc1nnc(N(CCO[N+](=O)[O-])[N+](=O)[O-])n1CO[N+](=O)[O-]	1.69105	8.06528	27.0208	72.5404	160.907	c1nnc[nH]1	Tra-3
O=[N+]([O-])OCCN(c1nc(CO[N+](=O)[O-])c([N+](=O)[O-])n1CCO[N+](=O)[O-])[N+](=O)[O-]	1.72089	8.06437	28.6201	103.476	190.828	c1c[nH]cn1	Imi
Cn1c(N(CCO[N+](=O)[O-])[N+](=O)[O-])nc([N+](=O)[O-])c1N(CCO[N+](=O)[O-])[N+](=O)[O-]	1.68826	8.06432	28.4161	125.101	200.994	c1c[nH]cn1	Imi
O=[N+]([O-])OCCc1c([N+](=O)[O-])c(N(CCO[N+](=O)[O-])[N+](=O)[O-])nn1CO[N+](=O)[O-]	1.73469	8.0634	28.5896	93.1784	176.45	c1cn[nH]c1	Pyr
CN(c1nonc1N(C)[N+](=O)[O-])[N+](=O)[O-]	1.6607	8.06302	27.8599	79.1574	161.586	c1cnon1	Oxa-1
O=[N+]([O-])OCCN(c1c(CO[N+](=O)[O-])nc([N+](=O)[O-])n1CCO[N+](=O)[O-])[N+](=O)[O-]	1.71729	8.06169	28.3803	94.633	184.134	c1c[nH]cn1	Imi
Cn1nc(N(CCO[N+](=O)[O-])[N+](=O)[O-])c(N(CCO[N+](=O)[O-])[N+](=O)[O-])n1	1.66043	8.06063	27.5592	96.4726	182.354	c1cn[nH]n1	Tra-2
Cn1c([N+](=O)[O-])nc([N+](=O)[O-])c1CO[N+](=O)[O-]	1.70659	8.06055	27.9663	105.074	204.169	c1c[nH]cn1	Imi
CN(c1c(N(CCO[N+](=O)[O-])[N+](=O)[O-])nn(CO[N+](=O)[O-])c1N(CCO[N+](=O)[O-])[N+](=O)[O-])[N+](=O)[O-]	1.73462	8.06015	30.2034	148.321	213.031	c1cn[nH]c1	Pyr
Cc1nn(CO[N+](=O)[O-])nc1[N+](=O)[O-]	1.65805	8.05984	26.349	89.3541	188.193	c1cn[nH]n1	Tra-2
O=[N+]([O-])OCCc1nc(N(CCO[N+](=O)[O-])[N+](=O)[O-])n(CO[N+](=O)[O-])c1[N+](=O)[O-]	1.73044	8.05977	28.7132	95.5967	182.573	c1c[nH]cn1	Imi
CN(c1c(CO[N+](=O)[O-])nc(N(CCO[N+](=O)[O-])[N+](=O)[O-])n1CO[N+](=O)[O-])[N+](=O)[O-]	1.70968	8.05829	28.8993	117.913	195.481	c1c[nH]cn1	Imi
O=[N+]([O-])OCCN(c1nc([N+](=O)[O-])n(CCO[N+](=O)[O-])c1CO[N+](=O)[O-])[N+](=O)[O-]	1.7202	8.05646	28.3571	89.2601	176.986	c1c[nH]cn1	Imi
O=[N+]([O-])OCCc1c([N+](=O)[O-])nn(CO[N+](=O)[O-])c1N(CCO[N+](=O)[O-])[N+](=O)[O-]	1.73049	8.05643	28.7885	93.1977	178.61	c1cn[nH]c1	Pyr
O=[N+]([O-])OCCN(c1cn(CO[N+](=O)[O-])nc1N(CCO[N+](=O)[O-])[N+](=O)[O-])[N+](=O)[O-]	1.72886	8.05557	29.0059	112.864	194.049	c1cn[nH]c1	Pyr
CN(c1nncn1CO[N+](=O)[O-])[N+](=O)[O-]	1.64825	8.05428	26.564	70.7753	160.099	c1nnc[nH]1	Tra-3
O=[N+]([O-])OCCc1c(N(CCO[N+](=O)[O-])[N+](=O)[O-])nn(CO[N+](=O)[O-])c1[N+](=O)[O-]	1.73064	8.05018	28.7038	99.2757	187.245	c1cn[nH]c1	Pyr
O=[N+]([O-])OCCN(c1c(CO[N+](=O)[O-])nn(CO[N+](=O)[O-])c1CO[N+](=O)[O-])[N+](=O)[O-]	1.73651	8.04816	28.8944	109.387	187.783	c1cn[nH]c1	Pyr
Cc1nc([N+](=O)[O-])n(CO[N+](=O)[O-])c1[N+](=O)[O-]	1.69385	8.04721	28.124	104.996	215.099	c1c[nH]cn1	Imi
CN(c1c(N(CCO[N+](=O)[O-])[N+](=O)[O-])nc(CO[N+](=O)[O-])n1CO[N+](=O)[O-])[N+](=O)[O-]	1.71306	8.04699	28.7125	110.205	183.731	c1c[nH]cn1	Imi
O=[N+]([O-])OCCN(c1nc([N+](=O)[O-])c(CO[N+](=O)[O-])n1CCO[N+](=O)[O-])[N+](=O)[O-]	1.72638	8.04656	28.411	91.9885	176.601	c1c[nH]cn1	Imi
O=[N+]([O-])OCc1ncnn1CO[N+](=O)[O-]	1.66367	8.04582	27.1752	66.9428	171.286	c1nc[nH]n1	Tra-4
O=[N+]([O-])OCCc1noc(N(CCO[N+](=O)[O-])[N+](=O)[O-])n1	1.68854	8.04497	26.5877	53.589	162.192	c1ncon1	Oxa-3
O=[N+]([O-])OCCN(c1cnn(CO[N+](=O)[O-])c1CO[N+](=O)[O-])[N+](=O)[O-]	1.70141	8.04453	27.5765	87.1661	170.479	c1cn[nH]c1	Pyr
CN(c1nn(CO[N+](=O)[O-])c(N(C)[N+](=O)[O-])c1N(CCO[N+](=O)[O-])[N+](=O)[O-])[N+](=O)[O-]	1.69026	8.04368	29.1295	148.109	218.531	c1cn[nH]c1	Pyr
Cc1c([N+](=O)[O-])nnn1CO[N+](=O)[O-]	1.65705	8.04334	26.1302	92.5178	189.517	c1c[nH]nn1	Tra-1
Cc1nnn(CO[N+](=O)[O-])c1[N+](=O)[O-]	1.64964	8.04305	26.4631	80.9789	186.815	c1c[nH]nn1	Tra-1
O=[N+]([O-])OCCN(c1nn(CCO[N+](=O)[O-])c(CO[N+](=O)[O-])c1[N+](=O)[O-])[N+](=O)[O-]	1.73078	8.04146	28.3244	98.4946	182.375	c1cn[nH]c1	Pyr
CN(c1c(N(CCO[N+](=O)[O-])[N+](=O)[O-])nnn1CCO[N+](=O)[O-])[N+](=O)[O-]	1.67036	8.04062	27.0227	91.3302	174.539	c1c[nH]nn1	Tra-1
CN(c1c(CO[N+](=O)[O-])c(N(CCO[N+](=O)[O-])[N+](=O)[O-])nn1CO[N+](=O)[O-])[N+](=O)[O-]	1.71243	8.03996	28.7377	116.214	189.764	c1cn[nH]c1	Pyr
CN(c1nc(N(CCO[N+](=O)[O-])[N+](=O)[O-])n(CO[N+](=O)[O-])c1CO[N+](=O)[O-])[N+](=O)[O-]	1.71409	8.03989	28.7035	110.253	180.861	c1c[nH]cn1	Imi
O=[N+]([O-])OCCn1nncc1[N+](=O)[O-]	1.65635	8.03875	25.67	77.8954	189.975	c1c[nH]nn1	Tra-1
O=[N+]([O-])OCCc1nn(CO[N+](=O)[O-])c([N+](=O)[O-])c1N(CCO[N+](=O)[O-])[N+](=O)[O-]	1.72885	8.03773	28.6719	99.2332	187.304	c1cn[nH]c1	Pyr
O=[N+]([O-])OCCN(c1nn(CO[N+](=O)[O-])c(CO[N+](=O)[O-])c1CO[N+](=O)[O-])[N+](=O)[O-]	1.74419	8.03672	28.7566	91.3281	161.607	c1cn[nH]c1	Pyr
Cn1nc([N+](=O)[O-])c(CO[N+](=O)[O-])c1[N+](=O)[O-]	1.69961	8.03647	28.0614	102.881	204.506	c1cn[nH]c1	Pyr
O=[N+]([O-])OCCN(c1cn(CO[N+](=O)[O-])c(N(CCO[N+](=O)[O-])[N+](=O)[O-])n1)[N+](=O)[O-]	1.73582	8.03607	29.0283	101.286	178.929	c1c[nH]cn1	Imi
O=[N+]([O-])OCCn1ncc([N+](=O)[O-])n1	1.65977	8.03596	25.4403	90.0303	190.466	c1cn[nH]n1	Tra-2
O=[N+]([O-])OCCN(c1cc(CO[N+](=O)[O-])n(CO[N+](=O)[O-])n1)[N+](=O)[O-]	1.71003	8.03587	27.5363	80.5531	164.51	c1cn[nH]c1	Pyr
CN(c1nn(CO[N+](=O)[O-])c(CO[N+](=O)[O-])c1N(CCO[N+](=O)[O-])[N+](=O)[O-])[N+](=O)[O-]	1.71436	8.03555	28.8265	110.316	182.314	c1cn[nH]c1	Pyr
Cn1nc(N(CCO[N+](=O)[O-])[N+](=O)[O-])nc1N(CCO[N+](=O)[O-])[N+](=O)[O-]	1.66941	8.03532	27.2287	88.5382	172.503	c1nc[nH]n1	Tra-4
CN(c1nc(N(CCO[N+](=O)[O-])[N+](=O)[O-])c(CO[N+](=O)[O-])n1CO[N+](=O)[O-])[N+](=O)[O-]	1.71441	8.03457	28.7412	108.772	179.98	c1c[nH]cn1	Imi
O=[N+]([O-])OCCN(c1nnn(CCO[N+](=O)[O-])c1CO[N+](=O)[O-])[N+](=O)[O-]	1.6971	8.03329	26.9151	65.8073	154.664	c1c[nH]nn1	Tra-1
Cc1nc([N+](=O)[O-])nn1CO[N+](=O)[O-]	1.65747	8.03265	26.1698	89.1172	189.115	c1nc[nH]n1	Tra-4
CN(c1cnc(N(CCO[N+](=O)[O-])[N+](=O)[O-])n1CO[N+](=O)[O-])[N+](=O)[O-]	1.6782	8.03167	27.6074	112.219	190.846	c1c[nH]cn1	Imi
O=[N+]([O-])OCCN(c1c([N+](=O)[O-])nc(CO[N+](=O)[O-])n1CCO[N+](=O)[O-])[N+](=O)[O-]	1.71518	8.03159	28.4305	101.665	191.544	c1c[nH]cn1	Imi
O=[N+]([O-])OCCc1nn(CO[N+](=O)[O-])c(N(CCO[N+](=O)[O-])[N+](=O)[O-])c1[N+](=O)[O-]	1.73502	8.03149	28.6646	97.1909	181.802	c1cn[nH]c1	Pyr
CN(c1c(N(CCO[N+](=O)[O-])[N+](=O)[O-])ncn1CO[N+](=O)[O-])[N+](=O)[O-]	1.68583	8.03128	27.5441	100.914	179.877	c1c[nH]cn1	Imi
Cc1nc([N+](=O)[O-])n(CO[N+](=O)[O-])n1	1.65065	8.03001	26.7272	79.2668	183.608	c1nc[nH]n1	Tra-4
Cn1nc(CO[N+](=O)[O-])nc1[N+](=O)[O-]	1.65794	8.02988	26.0482	91.9161	190.09	c1nc[nH]n1	Tra-4
O=[N+]([O-])OCCN(c1c(CO[N+](=O)[O-])cnn1CO[N+](=O)[O-])[N+](=O)[O-]	1.70594	8.02939	27.8269	83.2255	171.093	c1cn[nH]c1	Pyr
O=[N+]([O-])OCc1cnon1	1.67804	8.02936	26.5662	58.9502	174.951	c1cnon1	Oxa-1
O=[N+]([O-])OCCc1c(N(CCO[N+](=O)[O-])[N+](=O)[O-])c([N+](=O)[O-])nn1CO[N+](=O)[O-]	1.72392	8.02804	28.4665	95.0068	183.608	c1cn[nH]c1	Pyr
CN(c1c(N(CCO[N+](=O)[O-])[N+](=O)[O-])c([N+](=O)[O-])nn1CCO[N+](=O)[O-])[N+](=O)[O-]	1.70197	8.02711	28.3495	114.524	186.875	c1cn[nH]c1	Pyr
CN(c1cnn(CO[N+](=O)[O-])c1N(CCO[N+](=O)[O-])[N+](=O)[O-])[N+](=O)[O-]	1.68518	8.02658	27.6889	104.728	183.424	c1cn[nH]c1	Pyr
CN(c1nn(CCO[N+](=O)[O-])c([N+](=O)[O-])c1N(CCO[N+](=O)[O-])[N+](=O)[O-])[N+](=O)[O-]	1.69368	8.02576	28.3541	133.067	210.367	c1cn[nH]c1	Pyr
O=[N+]([O-])OCCN(c1nn(CO[N+](=O)[O-])cc1CO[N+](=O)[O-])[N+](=O)[O-]	1.69668	8.02575	27.6163	94.5155	175.733	c1cn[nH]c1	Pyr
CN(c1cn(CO[N+](=O)[O-])nc1N(CCO[N+](=O)[O-])[N+](=O)[O-])[N+](=O)[O-]	1.68107	8.02574	27.6417	106.329	185.765	c1cn[nH]c1	Pyr
O=[N+]([O-])OCCn1ncnc1[N+](=O)[O-]	1.6625	8.02571	25.8009	76.154	190.085	c1nc[nH]n1	Tra-4
O=[N+]([O-])OCCN(c1cn(CO[N+](=O)[O-])nc1CO[N+](=O)[O-])[N+](=O)[O-]	1.70435	8.02534	27.4785	85.7907	170.947	c1cn[nH]c1	Pyr
O=[N+]([O-])OCCN(c1nc(CO[N+](=O)[O-])c(CO[N+](=O)[O-])n1CO[N+](=O)[O-])[N+](=O)[O-]	1.74256	8.02516	28.6435	100.226	168.61	c1c[nH]cn1	Imi
O=[N+]([O-])OCCN(c1cnc(CO[N+](=O)[O-])n1CO[N+](=O)[O-])[N+](=O)[O-]	1.70461	8.02432	27.5514	85.3905	171.677	c1c[nH]cn1	Imi
O=[N+]([O-])OCCN(c1c([N+](=O)[O-])nn(CCO[N+](=O)[O-])c1CO[N+](=O)[O-])[N+](=O)[O-]	1.72481	8.02412	28.5381	89.9729	176.582	c1cn[nH]c1	Pyr
O=[N+]([O-])OCc1conn1	1.66765	8.0238	26.2867	61.3601	176.342	c1conn1	Oxa-4
O=[N+]([O-])OCCc1nn(CO[N+](=O)[O-])c(CO[N+](=O)[O-])c1[N+](=O)[O-]	1.71424	8.02299	27.0937	88.5107	176.443	c1cn[nH]c1	Pyr
CN(c1nc([N+](=O)[O-])c([N+](=O)[O-])n1C)[N+](=O)[O-]	1.68574	8.02157	27.0815	125.694	194.501	c1c[nH]cn1	Imi
O=[N+]([O-])OCCN(c1nc(N(CCO[N+](=O)[O-])[N+](=O)[O-])n(CCO[N+](=O)[O-])n1)[N+](=O)[O-]	1.7214	8.02018	28.4736	94.3238	175.572	c1nc[nH]n1	Tra-4
Cn1c([N+](=O)[O-])nc(N(CCO[N+](=O)[O-])[N+](=O)[O-])c1N(CCO[N+](=O)[O-])[N+](=O)[O-]	1.69097	8.01974	28.3934	122.844	199.921	c1c[nH]cn1	Imi
O=[N+]([O-])OCc1cnno1	1.66552	8.01893	26.2224	63.6676	175.831	c1conn1	Oxa-4
O=[N+]([O-])OCCN(c1nc(CO[N+](=O)[O-])n(CO[N+](=O)[O-])c1CO[N+](=O)[O-])[N+](=O)[O-]	1.74119	8.01884	28.4855	98.8753	170.189	c1c[nH]cn1	Imi
O=[N+]([O-])OCCc1nc(N(CCO[N+](=O)[O-])[N+](=O)[O-])n(CO[N+](=O)[O-])n1	1.69572	8.01787	27.0249	74.5897	165.304	c1nc[nH]n1	Tra-4
Cn1nnc(CO[N+](=O)[O-])c1[N+](=O)[O-]	1.65088	8.0173	26.2276	82.1773	186.186	c1c[nH]nn1	Tra-1
Cn1nc([N+](=O)[O-])nc1CO[N+](=O)[O-]	1.65689	8.0172	25.9402	91.3338	189.71	c1nc[nH]n1	Tra-4
O=[N+]([O-])OCCc1nc([N+](=O)[O-])n(CO[N+](=O)[O-])c1N(CCO[N+](=O)[O-])[N+](=O)[O-]	1.71992	8.01692	28.6964	99.772	193.115	c1c[nH]cn1	Imi
Cc1nn(CO[N+](=O)[O-])c([N+](=O)[O-])c1N(CCO[N+](=O)[O-])[N+](=O)[O-]	1.67436	8.01637	27.1183	103.493	188.581	c1cn[nH]c1	Pyr
O=[N+]([O-])OCCN(c1cc(N(CCO[N+](=O)[O-])[N+](=O)[O-])n(CO[N+](=O)[O-])n1)[N+](=O)[O-]	1.73212	8.01575	29.0356	118.703	194.202	c1cn[nH]c1	Pyr
CN(c1c(N(CCO[N+](=O)[O-])[N+](=O)[O-])nc([N+](=O)[O-])n1CCO[N+](=O)[O-])[N+](=O)[O-]	1.68595	8.01513	28.3094	129.782	209.271	c1c[nH]cn1	Imi
O=[N+]([O-])OCCN(c1nnc(CO[N+](=O)[O-])n1CCO[N+](=O)[O-])[N+](=O)[O-]	1.69472	8.0146	26.844	71.4424	160.422	c1nnc[nH]1	Tra-3
O=[N+]([O-])OCCc1nonc1N(CCO[N+](=O)[O-])[N+](=O)[O-]	1.69064	8.0145	26.9179	60.9202	167.694	c1cnon1	Oxa-1
Cc1nnc([N+](=O)[O-])n1CO[N+](=O)[O-]	1.64999	8.01354	26.5948	81.2586	182.56	c1nnc[nH]1	Tra-3
CN(c1nn(C)c([N+](=O)[O-])c1[N+](=O)[O-])[N+](=O)[O-]	1.68464	8.01304	27.1831	122.525	195.778	c1cn[nH]c1	Pyr
O=[N+]([O-])OCCc1nc(N(CCO[N+](=O)[O-])[N+](=O)[O-])no1	1.69024	8.0115	26.779	55.3336	165.153	c1ncon1	Oxa-3
O=[N+]([O-])OCCN(c1c([N+](=O)[O-])cnn1CCO[N+](=O)[O-])[N+](=O)[O-]	1.69745	8.01121	27.1648	92.8769	182.903	c1cn[nH]c1	Pyr
O=[N+]([O-])OCCn1cc([N+](=O)[O-])nn1	1.65818	8.0112	25.4009	88.1912	190.166	c1c[nH]nn1	Tra-1
Cn1c(CO[N+](=O)[O-])nnc1[N+](=O)[O-]	1.67008	8.01089	26.3835	92.3579	191.837	c1nnc[nH]1	Tra-3
CN(c1c(N(CCO[N+](=O)[O-])[N+](=O)[O-])cnn1CO[N+](=O)[O-])[N+](=O)[O-]	1.67778	8.01042	27.6425	114.39	194.705	c1cn[nH]c1	Pyr
O=[N+]([O-])OCCN(c1c(CO[N+](=O)[O-])nn(CCO[N+](=O)[O-])c1[N+](=O)[O-])[N+](=O)[O-]	1.7252	8.00999	28.336	107.042	195.639	c1cn[nH]c1	Pyr
O=[N+]([O-])OCCc1c(N(CCO[N+](=O)[O-])[N+](=O)[O-])nc([N+](=O)[O-])n1CO[N+](=O)[O-]	1.72625	8.00904	28.5223	93.3365	176.328	c1c[nH]cn1	Imi
Cn1c(N(CCO[N+](=O)[O-])[N+](=O)[O-])nnc1N(CCO[N+](=O)[O-])[N+](=O)[O-]	1.67111	8.00873	27.0673	90.9828	171.754	c1nnc[nH]1	Tra-3
O=[N+]([O-])OCCN(c1cc([N+](=O)[O-])n(CCO[N+](=O)[O-])n1)[N+](=O)[O-]	1.69974	8.00735	27.0778	94.0239	183.645	c1cn[nH]c1	Pyr
O=[N+]([O-])OCn1cc([N+](=O)[O-])cn1	1.67827	8.00689	26.4035	88.5747	203.188	c1cn[nH]c1	Pyr
CN(c1c([N+](=O)[O-])nc([N+](=O)[O-])n1C)[N+](=O)[O-]	1.68224	8.00616	26.9884	129.103	199.413	c1c[nH]cn1	Imi
Cn1nc([N+](=O)[O-])c(N(CCO[N+](=O)[O-])[N+](=O)[O-])c1N(CCO[N+](=O)[O-])[N+](=O)[O-]	1.69153	8.00608	28.6387	123.805	203.003	c1cn[nH]c1	Pyr
CN(c1nn(CO[N+](=O)[O-])c(N(CCO[N+](=O)[O-])[N+](=O)[O-])c1CO[N+](=O)[O-])[N+](=O)[O-]	1.71062	8.00525	28.622	129.209	200.608	c1cn[nH]c1	Pyr
O=[N+]([O-])OCCn1cnnc1[N+](=O)[O-]	1.66161	8.00518	25.7052	76.3196	190.189	c1nnc[nH]1	Tra-3
CN(c1c([N+](=O)[O-])c([N+](=O)[O-])nn1C)[N+](=O)[O-]	1.67952	8.00499	26.9689	124.072	196.041	c1cn[nH]c1	Pyr
O=[N+]([O-])OCCn1cnc([N+](=O)[O-])n1	1.66296	8.00392	25.395	84.6447	191.31	c1nc[nH]n1	Tra-4
Cn1nc(CO[N+](=O)[O-])c([N+](=O)[O-])c1N(CCO[N+](=O)[O-])[N+](=O)[O-]	1.68333	8.00333	27.2127	100.487	180.196	c1cn[nH]c1	Pyr
CN(c1c(N(CCO[N+](=O)[O-])[N+](=O)[O-])nn(CO[N+](=O)[O-])c1N(C)[N+](=O)[O-])[N+](=O)[O-]	1.6882	8.00309	28.7914	160.81	226.398	c1cn[nH]c1	Pyr
O=[N+]([O-])OCCc1nn(CO[N+](=O)[O-])nc1N(CCO[N+](=O)[O-])[N+](=O)[O-]	1.69858	8.00305	27.1558	72.21	161.911	c1cn[nH]n1	Tra-2
O=[N+]([O-])OCCc1nc(N(CCO[N+](=O)[O-])[N+](=O)[O-])nn1CO[N+](=O)[O-]	1.6959	8.00243	26.9702	72.0278	161.196	c1nc[nH]n1	Tra-4
CN(c1nn(CO[N+](=O)[O-])c(N(CCO[N+](=O)[O-])[N+](=O)[O-])c1N(C)[N+](=O)[O-])[N+](=O)[O-]	1.68952	8.00223	28.4306	157.741	215.368	c1cn[nH]c1	Pyr
CN(c1nc([N+](=O)[O-])n(C)c1[N+](=O)[O-])[N+](=O)[O-]	1.67963	8.00209	26.9666	129.081	196.327	c1c[nH]cn1	Imi
CN(c1nc(N(CCO[N+](=O)[O-])[N+](=O)[O-])n(CCO[N+](=O)[O-])c1[N+](=O)[O-])[N+](=O)[O-]	1.70217	8.00139	28.3818	121.79	194.973	c1c[nH]cn1	Imi
O=[N+]([O-])OCc1nnco1	1.67265	8.00109	26.3293	70.772	184.808	c1nnco1	Oxa-2
O=[N+]([O-])OCc1ncon1	1.67192	8.00073	26.4983	58.995	177.745	c1ncon1	Oxa-3
CN(c1nc(CO[N+](=O)[O-])c(N(CCO[N+](=O)[O-])[N+](=O)[O-])n1CO[N+](=O)[O-])[N+](=O)[O-]	1.71418	7.9995	28.7711	115.571	180.143	c1c[nH]cn1	Imi
Cn1nc(CO[N+](=O)[O-])c([N+](=O)[O-])n1	1.6589	7.99937	26.7585	77.5864	179.082	c1cn[nH]n1	Tra-2
O=[N+]([O-])OCCN(c1cn(CO[N+](=O)[O-])c(CO[N+](=O)[O-])n1)[N+](=O)[O-]	1.696	7.9987	27.3806	98.2407	180.552	c1c[nH]cn1	Imi
CN(c1ncc(N(CCO[N+](=O)[O-])[N+](=O)[O-])n1CO[N+](=O)[O-])[N+](=O)[O-]	1.68841	7.99847	27.704	102.189	180.549	c1c[nH]cn1	Imi
O=[N+]([O-])OCc1ncno1	1.67179	7.99817	26.4825	58.9361	177.047	c1ncon1	Oxa-3
O=[N+]([O-])OCCc1nc(N(CCO[N+](=O)[O-])[N+](=O)[O-])c([N+](=O)[O-])n1CO[N+](=O)[O-]	1.72878	7.99663	28.4123	100.926	182.16	c1c[nH]cn1	Imi
O=[N+]([O-])OCn1ccc([N+](=O)[O-])n1	1.68257	7.99562	26.4217	89.7141	205.057	c1cn[nH]c1	Pyr
O=[N+]([O-])OCCN(c1c(CO[N+](=O)[O-])ncn1CO[N+](=O)[O-])[N+](=O)[O-]	1.70371	7.99556	27.5868	88.9117	177.187	c1c[nH]cn1	Imi
O=[N+]([O-])OCCN(c1ncn(CO[N+](=O)[O-])c1CO[N+](=O)[O-])[N+](=O)[O-]	1.70598	7.99474	27.4195	84.7503	170.644	c1c[nH]cn1	Imi
O=[N+]([O-])OCCN(c1cnn(CCO[N+](=O)[O-])c1[N+](=O)[O-])[N+](=O)[O-]	1.69061	7.99446	27.0858	93.1977	186.473	c1cn[nH]c1	Pyr
Cn1nnc([N+](=O)[O-])c1CO[N+](=O)[O-]	1.64761	7.99432	26.2834	78.975	181.976	c1c[nH]nn1	Tra-1
O=[N+]([O-])OCc1nn(CO[N+](=O)[O-])c(CO[N+](=O)[O-])c1CO[N+](=O)[O-]	1.72284	7.99379	27.4414	86.0774	164.388	c1cn[nH]c1	Pyr
CN(c1cc(N(CCO[N+](=O)[O-])[N+](=O)[O-])nn1CO[N+](=O)[O-])[N+](=O)[O-]	1.68832	7.99337	27.6384	104.67	180.728	c1cn[nH]c1	Pyr
CN(c1c(CO[N+](=O)[O-])nn(CO[N+](=O)[O-])c1CO[N+](=O)[O-])[N+](=O)[O-]	1.69242	7.99283	27.3171	94.0214	169.886	c1cn[nH]c1	Pyr
Cn1nc(N(CCO[N+](=O)[O-])[N+](=O)[O-])c(N(CCO[N+](=O)[O-])[N+](=O)[O-])c1[N+](=O)[O-]	1.70081	7.99278	28.7063	120.471	193.396	c1cn[nH]c1	Pyr
O=[N+]([O-])OCCN(c1ncn(CCO[N+](=O)[O-])c1[N+](=O)[O-])[N+](=O)[O-]	1.68758	7.9927	26.8828	94.2154	183.826	c1c[nH]cn1	Imi
O=[N+]([O-])OCCN(c1nn(CCO[N+](=O)[O-])c([N+](=O)[O-])c1CO[N+](=O)[O-])[N+](=O)[O-]	1.72818	7.9924	28.3732	106.904	192.465	c1cn[nH]c1	Pyr
O=[N+]([O-])OCCc1nnc(N(CCO[N+](=O)[O-])[N+](=O)[O-])o1	1.6901	7.99136	26.6521	48.8701	162.698	c1nnco1	Oxa-2
O=[N+]([O-])OCCc1nc(CO[N+](=O)[O-])n(CO[N+](=O)[O-])c1[N+](=O)[O-]	1.7141	7.99098	27.2822	85.8915	177.433	c1c[nH]cn1	Imi
O=[N+]([O-])OCn1nccc1[N+](=O)[O-]	1.6791	7.98993	26.9023	79.6112	209.231	c1cn[nH]c1	Pyr
O=[N+]([O-])OCCN(c1ncc(CO[N+](=O)[O-])n1CO[N+](=O)[O-])[N+](=O)[O-]	1.71281	7.98977	27.7145	77.8423	164.284	c1c[nH]cn1	Imi
CN(c1nnn(CCO[N+](=O)[O-])c1N(CCO[N+](=O)[O-])[N+](=O)[O-])[N+](=O)[O-]	1.67231	7.98946	27.21	91.9258	175.419	c1c[nH]nn1	Tra-1
O=[N+]([O-])OCn1cnc([N+](=O)[O-])c1	1.67276	7.98843	26.0342	92.8254	205.005	c1c[nH]cn1	Imi
O=[N+]([O-])OCCn1c(CO[N+](=O)[O-])nc(CO[N+](=O)[O-])c1[N+](=O)[O-]	1.71342	7.98763	27.1645	85.683	174.193	c1c[nH]cn1	Imi
CN(c1nc([N+](=O)[O-])n(CCO[N+](=O)[O-])c1N(CCO[N+](=O)[O-])[N+](=O)[O-])[N+](=O)[O-]	1.69683	7.98618	28.3664	120.677	194.49	c1c[nH]cn1	Imi
CN(c1c(CO[N+](=O)[O-])nc(CO[N+](=O)[O-])n1CO[N+](=O)[O-])[N+](=O)[O-]	1.69063	7.98613	27.2386	95.7727	172.839	c1c[nH]cn1	Imi
CN(c1c(CO[N+](=O)[O-])c(CO[N+](=O)[O-])nn1CO[N+](=O)[O-])[N+](=O)[O-]	1.69093	7.98462	27.1888	101.181	174.766	c1cn[nH]c1	Pyr
O=[N+]([O-])OCCN(c1nc(CO[N+](=O)[O-])n(CCO[N+](=O)[O-])n1)[N+](=O)[O-]	1.69433	7.98399	26.8413	73.7006	162.563	c1nc[nH]n1	Tra-4
CN(c1c([N+](=O)[O-])nn(CCO[N+](=O)[O-])c1N(CCO[N+](=O)[O-])[N+](=O)[O-])[N+](=O)[O-]	1.69756	7.98378	28.2929	123.69	197.771	c1cn[nH]c1	Pyr
O=[N+]([O-])OCCN(c1ncc([N+](=O)[O-])n1CCO[N+](=O)[O-])[N+](=O)[O-]	1.69479	7.98203	27.1588	93.0237	187.36	c1c[nH]cn1	Imi
O=[N+]([O-])OCCn1nc(CO[N+](=O)[O-])c(CO[N+](=O)[O-])c1[N+](=O)[O-]	1.71283	7.98185	27.1652	86.6322	178.125	c1cn[nH]c1	Pyr
CN(c1c([N+](=O)[O-])nc(N(CCO[N+](=O)[O-])[N+](=O)[O-])n1CCO[N+](=O)[O-])[N+](=O)[O-]	1.69975	7.98168	28.1369	123.817	192.015	c1c[nH]cn1	Imi
Cc1c(N(CCO[N+](=O)[O-])[N+](=O)[O-])c([N+](=O)[O-])nn1CO[N+](=O)[O-]	1.67059	7.97978	27.0615	102.116	188.274	c1cn[nH]c1	Pyr
CN(c1c([N+](=O)[O-])c(CCO[N+](=O)[O-])nn1CO[N+](=O)[O-])[N+](=O)[O-]	1.68855	7.97912	27.0068	98.2663	180.325	c1cn[nH]c1	Pyr
Cc1c(N(CCO[N+](=O)[O-])[N+](=O)[O-])nc([N+](=O)[O-])n1CO[N+](=O)[O-]	1.68051	7.97906	27.1009	97.2265	182.109	c1c[nH]cn1	Imi
CN(c1nc([N+](=O)[O-])c(N(CCO[N+](=O)[O-])[N+](=O)[O-])n1CCO[N+](=O)[O-])[N+](=O)[O-]	1.69317	7.97875	28.4477	126.527	205.566	c1c[nH]cn1	Imi
O=[N+]([O-])OCn1cncc1[N+](=O)[O-]	1.67876	7.97831	26.7042	81.298	210.71	c1c[nH]cn1	Imi
Cc1nc(N(CCO[N+](=O)[O-])[N+](=O)[O-])n(CO[N+](=O)[O-])c1[N+](=O)[O-]	1.68095	7.97802	27.3564	99.8419	186.722	c1c[nH]cn1	Imi
O=[N+]([O-])OCCN(c1cn(CCO[N+](=O)[O-])c([N+](=O)[O-])n1)[N+](=O)[O-]	1.68551	7.9775	26.6324	93.3013	184.699	c1c[nH]cn1	Imi
O=[N+]([O-])OCCN(c1cc(CO[N+](=O)[O-])nn1CO[N+](=O)[O-])[N+](=O)[O-]	1.70581	7.97479	27.6563	93.7988	181.681	c1cn[nH]c1	Pyr
Cc1c(N(CCO[N+](=O)[O-])[N+](=O)[O-])nnn1CO[N+](=O)[O-]	1.63449	7.97451	25.3535	79.6017	166.037	c1c[nH]nn1	Tra-1
O=[N+]([O-])OCCn1nc(CO[N+](=O)[O-])c([N+](=O)[O-])c1CO[N+](=O)[O-]	1.71438	7.97448	27.0561	86.6647	176.105	c1cn[nH]c1	Pyr
CN(c1nnc([N+](=O)[O-])n1C)[N+](=O)[O-]	1.63753	7.97415	25.34	105.228	181.668	c1nnc[nH]1	Tra-3
Cc1nc(N(CCO[N+](=O)[O-])[N+](=O)[O-])c([N+](=O)[O-])n1CO[N+](=O)[O-]	1.67299	7.97314	26.9653	104.691	190.42	c1c[nH]cn1	Imi
CN(c1nn(CO[N+](=O)[O-])cc1N(CCO[N+](=O)[O-])[N+](=O)[O-])[N+](=O)[O-]	1.67695	7.97298	27.4686	116.942	196.445	c1cn[nH]c1	Pyr
O=[N+]([O-])OCCc1nc([N+](=O)[O-])n(CO[N+](=O)[O-])c1CO[N+](=O)[O-]	1.70828	7.97286	27.176	87.2457	179.914	c1c[nH]cn1	Imi
Cn1nc(N(CCO[N+](=O)[O-])[N+](=O)[O-])c([N+](=O)[O-])c1CO[N+](=O)[O-]	1.68327	7.97256	27.105	97.6507	179.506	c1cn[nH]c1	Pyr
O=[N+]([O-])OCCN(c1nc(CO[N+](=O)[O-])cn1CO[N+](=O)[O-])[N+](=O)[O-]	1.70553	7.97249	27.445	87.6997	174.225	c1c[nH]cn1	Imi
CN(c1c(CO[N+](=O)[O-])nn(CCO[N+](=O)[O-])c1[N+](=O)[O-])[N+](=O)[O-]	1.6825	7.97246	26.9289	98.3168	182.675	c1cn[nH]c1	Pyr
O=[N+]([O-])OCCc1c(N(CCO[N+](=O)[O-])[N+](=O)[O-])nnn1CO[N+](=O)[O-]	1.69731	7.97203	27.1138	74.2084	163.081	c1c[nH]nn1	Tra-1
O=[N+]([O-])OCCN(c1nc(CO[N+](=O)[O-])nn1CCO[N+](=O)[O-])[N+](=O)[O-]	1.69663	7.97165	27.0115	75.4418	161.475	c1nc[nH]n1	Tra-4
CN(c1nc([N+](=O)[O-])n(C)n1)[N+](=O)[O-]	1.64449	7.9716	25.6289	102.021	178.868	c1nc[nH]n1	Tra-4
O=[N+]([O-])OCCc1c([N+](=O)[O-])c(CO[N+](=O)[O-])nn1CO[N+](=O)[O-]	1.71694	7.97067	27.2545	86.2424	177.049	c1cn[nH]c1	Pyr
O=[N+]([O-])OCn1ccnc1[N+](=O)[O-]	1.67818	7.96974	26.7753	79.8352	208.334	c1c[nH]cn1	Imi
O=[N+]([O-])OCCc1c(N(CCO[N+](=O)[O-])[N+](=O)[O-])c(N(CCO[N+](=O)[O-])[N+](=O)[O-])nn1CO[N+](=O)[O-]	1.72372	7.9694	28.452	109.919	189.13	c1cn[nH]c1	Pyr
O=[N+]([O-])OCCc1onnc1N(CCO[N+](=O)[O-])[N+](=O)[O-]	1.69796	7.96838	26.9644	51.0882	160.199	c1conn1	Oxa-4
O=[N+]([O-])OCCc1nn(CO[N+](=O)[O-])c([N+](=O)[O-])c1CO[N+](=O)[O-]	1.71359	7.96816	27.3103	89.1959	183.225	c1cn[nH]c1	Pyr
CN(c1nn(CO[N+](=O)[O-])c([N+](=O)[O-])c1CCO[N+](=O)[O-])[N+](=O)[O-]	1.68268	7.96806	26.9962	104.024	188.493	c1cn[nH]c1	Pyr
CN(c1nn(CO[N+](=O)[O-])c(CO[N+](=O)[O-])c1N(C)[N+](=O)[O-])[N+](=O)[O-]	1.67139	7.96791	27.2244	113.942	180.279	c1cn[nH]c1	Pyr
CN(c1nc(N(CCO[N+](=O)[O-])[N+](=O)[O-])cn1CO[N+](=O)[O-])[N+](=O)[O-]	1.68835	7.96788	27.4945	102.801	179.332	c1c[nH]cn1	Imi
CN(c1nc([N+](=O)[O-])nn1C)[N+](=O)[O-]	1.63848	7.96696	25.3542	104.46	180.886	c1nc[nH]n1	Tra-4
CN(c1nn(CCO[N+](=O)[O-])nc1N(CCO[N+](=O)[O-])[N+](=O)[O-])[N+](=O)[O-]	1.66825	7.96638	26.8534	104.385	180.083	c1cn[nH]n1	Tra-2
O=[N+]([O-])OCc1nc(CO[N+](=O)[O-])n(CO[N+](=O)[O-])c1CO[N+](=O)[O-]	1.72277	7.9651	27.2933	94.8087	167.88	c1c[nH]cn1	Imi
CN(c1nn(CO[N+](=O)[O-])c(CCO[N+](=O)[O-])c1[N+](=O)[O-])[N+](=O)[O-]	1.68894	7.96483	27.0259	97.9333	179.121	c1cn[nH]c1	Pyr
O=[N+]([O-])OCCc1c([N+](=O)[O-])nn(CO[N+](=O)[O-])c1CO[N+](=O)[O-]	1.70221	7.96454	27.0217	91.0154	188.883	c1cn[nH]c1	Pyr
O=[N+]([O-])OCCc1c(N(CCO[N+](=O)[O-])[N+](=O)[O-])nn(CO[N+](=O)[O-])c1N(CCO[N+](=O)[O-])[N+](=O)[O-]	1.7214	7.96406	28.6799	123.516	203.228	c1cn[nH]c1	Pyr
O=[N+]([O-])OCCc1nc(N(CCO[N+](=O)[O-])[N+](=O)[O-])c(N(CCO[N+](=O)[O-])[N+](=O)[O-])n1CO[N+](=O)[O-]	1.72054	7.96381	28.5478	119.76	198.648	c1c[nH]cn1	Imi
O=[N+]([O-])OCCN(c1nc(N(CCO[N+](=O)[O-])[N+](=O)[O-])n(CCO[N+](=O)[O-])c1N(CCO[N+](=O)[O-])[N+](=O)[O-])[N+](=O)[O-]	1.7494	7.96295	29.8401	142.023	210.337	c1c[nH]cn1	Imi
O=[N+]([O-])OCCN(c1cn(CCO[N+](=O)[O-])nc1[N+](=O)[O-])[N+](=O)[O-]	1.68826	7.96281	26.7208	91.4706	183.843	c1cn[nH]c1	Pyr
O=[N+]([O-])OCCc1c(CO[N+](=O)[O-])nn(CO[N+](=O)[O-])c1[N+](=O)[O-]	1.71283	7.96202	27.2677	94.3828	187.707	c1cn[nH]c1	Pyr
CN(c1c(CO[N+](=O)[O-])nn(CO[N+](=O)[O-])c1N(CCO[N+](=O)[O-])[N+](=O)[O-])[N+](=O)[O-]	1.71085	7.96179	28.4985	128.186	188.009	c1cn[nH]c1	Pyr
CN(c1nc(CCO[N+](=O)[O-])c([N+](=O)[O-])n1CO[N+](=O)[O-])[N+](=O)[O-]	1.68308	7.96131	26.9737	102.195	185.711	c1c[nH]cn1	Imi
Cn1c(CO[N+](=O)[O-])nc([N+](=O)[O-])c1N(CCO[N+](=O)[O-])[N+](=O)[O-]	1.67126	7.96035	26.8306	101.327	186.268	c1c[nH]cn1	Imi
O=[N+]([O-])OCCc1nc([N+](=O)[O-])n(CCO[N+](=O)[O-])c1[N+](=O)[O-]	1.69811	7.96024	26.6995	90.6871	196.59	c1c[nH]cn1	Imi
O=[N+]([O-])OCCc1nn(CO[N+](=O)[O-])nc1CO[N+](=O)[O-]	1.67171	7.95945	25.5089	63.7587	154.102	c1cn[nH]n1	Tra-2
O=[N+]([O-])OCCc1nnn(CO[N+](=O)[O-])c1N(CCO[N+](=O)[O-])[N+](=O)[O-]	1.6975	7.95936	27.2171	76.3085	165.193	c1c[nH]nn1	Tra-1
CN(c1c(CO[N+](=O)[O-])nn(CO[N+](=O)[O-])c1N(C)[N+](=O)[O-])[N+](=O)[O-]	1.67173	7.95901	27.3002	113.798	181.446	c1cn[nH]c1	Pyr
O=[N+]([O-])OCCc1nnn(CO[N+](=O)[O-])c1CO[N+](=O)[O-]	1.66791	7.95898	25.3458	66.7889	157.653	c1c[nH]nn1	Tra-1
COc1c([N+](=O)[O-])nn(CO[N+](=O)[O-])c1[N+](=O)[O-]	1.72074	7.95658	28.4149	97.6584	195.295	c1cn[nH]c1	Pyr
O=[N+]([O-])OCCc1c([N+](=O)[O-])nn(CCO[N+](=O)[O-])c1[N+](=O)[O-]	1.70019	7.95582	26.7078	91.3797	196.64	c1cn[nH]c1	Pyr
CN(c1nnn(C)c1[N+](=O)[O-])[N+](=O)[O-]	1.62874	7.95535	25.4092	98.2954	176.825	c1c[nH]nn1	Tra-1
CN(c1c([N+](=O)[O-])nn(C)c1[N+](=O)[O-])[N+](=O)[O-]	1.66899	7.95382	26.8477	129.163	196.701	c1cn[nH]c1	Pyr
O=[N+]([O-])OCCN(c1c(CO[N+](=O)[O-])c([N+](=O)[O-])nn1CCO[N+](=O)[O-])[N+](=O)[O-]	1.72375	7.95319	28.4084	108.601	194.093	c1cn[nH]c1	Pyr
O=[N+]([O-])OCCN(c1c(CO[N+](=O)[O-])nnn1CCO[N+](=O)[O-])[N+](=O)[O-]	1.69587	7.9527	27.0552	76.407	165.765	c1c[nH]nn1	Tra-1
Cc1c([N+](=O)[O-])nn(CO[N+](=O)[O-])c1N(CCO[N+](=O)[O-])[N+](=O)[O-]	1.67713	7.95241	27.0888	105.461	191.817	c1cn[nH]c1	Pyr
CN(c1c([N+](=O)[O-])c(N(CCO[N+](=O)[O-])[N+](=O)[O-])nn1C)[N+](=O)[O-]	1.65585	7.95165	27.0103	131.153	200.581	c1cn[nH]c1	Pyr
CN(c1nc(CO[N+](=O)[O-])c(N(C)[N+](=O)[O-])n1CO[N+](=O)[O-])[N+](=O)[O-]	1.66913	7.95144	27.1778	117.123	183.659	c1c[nH]cn1	Imi
CN(c1nn(CCO[N+](=O)[O-])c([N+](=O)[O-])c1CO[N+](=O)[O-])[N+](=O)[O-]	1.68249	7.95042	26.9197	102.006	185.387	c1cn[nH]c1	Pyr
Cc1nc(N(CCO[N+](=O)[O-])[N+](=O)[O-])n(CO[N+](=O)[O-])n1	1.64223	7.95022	25.9882	69.5522	161.085	c1nc[nH]n1	Tra-4
CN(c1nnc(N(CCO[N+](=O)[O-])[N+](=O)[O-])n1CCO[N+](=O)[O-])[N+](=O)[O-]	1.66488	7.94968	27.2743	111.685	196.624	c1nnc[nH]1	Tra-3
O=[N+]([O-])OCCN(c1cnc([N+](=O)[O-])n1CCO[N+](=O)[O-])[N+](=O)[O-]	1.69009	7.94829	27.0777	90.0677	188.414	c1c[nH]cn1	Imi
CN(c1nc(N(CCO[N+](=O)[O-])[N+](=O)[O-])n(CCO[N+](=O)[O-])n1)[N+](=O)[O-]	1.67246	7.94825	27.0508	93.7159	169.517	c1nc[nH]n1	Tra-4
Cn1c(N(CCO[N+](=O)[O-])[N+](=O)[O-])nc([N+](=O)[O-])c1CO[N+](=O)[O-]	1.68347	7.94812	26.9976	98.0295	180.53	c1c[nH]cn1	Imi
O=[N+]([O-])OCCn1nc([N+](=O)[O-])c(CO[N+](=O)[O-])c1CO[N+](=O)[O-]	1.70632	7.9481	26.8861	86.2809	181.214	c1cn[nH]c1	Pyr
Cc1nc(N(CCO[N+](=O)[O-])[N+](=O)[O-])nn1CO[N+](=O)[O-]	1.6426	7.94773	25.6372	71.8135	161.748	c1nc[nH]n1	Tra-4
CN(c1c(CO[N+](=O)[O-])nc([N+](=O)[O-])n1CCO[N+](=O)[O-])[N+](=O)[O-]	1.67738	7.94768	26.6993	101.443	184.676	c1c[nH]cn1	Imi
CN(c1nn(CO[N+](=O)[O-])nc1CCO[N+](=O)[O-])[N+](=O)[O-]	1.63875	7.94611	25.2311	79.6306	165.939	c1cn[nH]n1	Tra-2
CN(c1nc(CCO[N+](=O)[O-])nn1CO[N+](=O)[O-])[N+](=O)[O-]	1.64349	7.94598	25.3366	73.5389	161.705	c1nc[nH]n1	Tra-4
O=[N+]([O-])OCCN(c1c(CO[N+](=O)[O-])nn(CCO[N+](=O)[O-])c1N(CCO[N+](=O)[O-])[N+](=O)[O-])[N+](=O)[O-]	1.7255	7.94549	28.3505	103.734	182.326	c1cn[nH]c1	Pyr
O=[N+]([O-])OCCc1nc([N+](=O)[O-])c(CO[N+](=O)[O-])n1CO[N+](=O)[O-]	1.70713	7.94216	26.9609	88.6922	183.639	c1c[nH]cn1	Imi
O=[N+]([O-])OCCc1nnoc1N(CCO[N+](=O)[O-])[N+](=O)[O-]	1.69582	7.94211	26.8107	58.4058	165.238	c1conn1	Oxa-4
CN(c1c(CCO[N+](=O)[O-])c([N+](=O)[O-])nn1CO[N+](=O)[O-])[N+](=O)[O-]	1.67642	7.94197	27.0101	103.683	193.412	c1cn[nH]c1	Pyr
Cn1nc([N+](=O)[O-])c(CO[N+](=O)[O-])c1N(CCO[N+](=O)[O-])[N+](=O)[O-]	1.67474	7.94192	27.155	99.5618	188.157	c1cn[nH]c1	Pyr
Cn1nc(N(CCO[N+](=O)[O-])[N+](=O)[O-])c(CO[N+](=O)[O-])c1[N+](=O)[O-]	1.675	7.94179	27.1791	103.348	192.139	c1cn[nH]c1	Pyr
Cc1nnn(CO[N+](=O)[O-])c1N(CCO[N+](=O)[O-])[N+](=O)[O-]	1.63418	7.94146	25.9044	80.33	172.422	c1c[nH]nn1	Tra-1
CN(c1c(CCO[N+](=O)[O-])nc([N+](=O)[O-])n1CO[N+](=O)[O-])[N+](=O)[O-]	1.67381	7.94082	26.9579	101.358	191.823	c1c[nH]cn1	Imi
CN(c1nc(CO[N+](=O)[O-])c(CO[N+](=O)[O-])n1CO[N+](=O)[O-])[N+](=O)[O-]	1.69221	7.94065	27.4042	96.3504	167.636	c1c[nH]cn1	Imi
O=[N+]([O-])OCCN(c1cnnn1CCO[N+](=O)[O-])[N+](=O)[O-]	1.65177	7.94001	25.3019	69.656	163.684	c1c[nH]nn1	Tra-1
O=[N+]([O-])OCCn1nc(CO[N+](=O)[O-])c(CO[N+](=O)[O-])n1	1.66799	7.93993	25.2116	65.1198	155.195	c1cn[nH]n1	Tra-2
CN(c1nc(CO[N+](=O)[O-])c([N+](=O)[O-])n1CCO[N+](=O)[O-])[N+](=O)[O-]	1.67936	7.93992	26.7424	104.504	188.406	c1c[nH]cn1	Imi
CN(c1nc(N(CCO[N+](=O)[O-])[N+](=O)[O-])nn1CCO[N+](=O)[O-])[N+](=O)[O-]	1.67139	7.93925	26.9651	95.5093	169.632	c1nc[nH]n1	Tra-4
Cc1nnc(N(CCO[N+](=O)[O-])[N+](=O)[O-])n1CO[N+](=O)[O-]	1.642	7.93789	25.7627	70.7578	161.675	c1nnc[nH]1	Tra-3
CN(c1nc(N(C)[N+](=O)[O-])n(CO[N+](=O)[O-])c1N(CCO[N+](=O)[O-])[N+](=O)[O-])[N+](=O)[O-]	1.689	7.93546	28.6091	158.065	212.671	c1c[nH]cn1	Imi
CN(c1c(CCO[N+](=O)[O-])nnn1CO[N+](=O)[O-])[N+](=O)[O-]	1.6387	7.93544	25.3258	78.9164	167.755	c1c[nH]nn1	Tra-1
CN(c1nc(N(CCO[N+](=O)[O-])[N+](=O)[O-])n(CO[N+](=O)[O-])c1N(C)[N+](=O)[O-])[N+](=O)[O-]	1.69082	7.93473	28.5357	156.341	203.303	c1c[nH]cn1	Imi
Cn1nc(CO[N+](=O)[O-])c(N(CCO[N+](=O)[O-])[N+](=O)[O-])n1	1.6429	7.93456	25.7098	69.8993	160.625	c1cn[nH]n1	Tra-2
Cn1c(CO[N+](=O)[O-])nnc1N(CCO[N+](=O)[O-])[N+](=O)[O-]	1.63888	7.93388	25.3261	75.9991	164.194	c1nnc[nH]1	Tra-3
O=[N+]([O-])OCCn1nnc(CO[N+](=O)[O-])c1CO[N+](=O)[O-]	1.66656	7.93345	25.2184	66.7828	157.775	c1c[nH]nn1	Tra-1
O=[N+]([O-])OCCN(c1ncn(CCO[N+](=O)[O-])n1)[N+](=O)[O-]	1.64502	7.93273	25.0936	73.982	162.419	c1nc[nH]n1	Tra-4
CN(c1nn(C)c(N(CCO[N+](=O)[O-])[N+](=O)[O-])c1[N+](=O)[O-])[N+](=O)[O-]	1.65984	7.93257	26.9715	127.351	197.407	c1cn[nH]c1	Pyr
CN(c1nn(CO[N+](=O)[O-])c(N(C)[N+](=O)[O-])c1N(C)[N+](=O)[O-])[N+](=O)[O-]	1.65679	7.93245	26.9819	152.598	199.059	c1cn[nH]c1	Pyr
COc1nn(CO[N+](=O)[O-])c([N+](=O)[O-])c1[N+](=O)[O-]	1.72806	7.93226	28.7218	97.6077	191.842	c1cn[nH]c1	Pyr
Cc1nnn(CO[N+](=O)[O-])n1	1.58341	7.93213	23.956	68.2909	167.838	c1nn[nH]n1	Tet-2
CN(c1c(CO[N+](=O)[O-])nnn1CCO[N+](=O)[O-])[N+](=O)[O-]	1.64217	7.93178	25.2398	74.4454	162.262	c1c[nH]nn1	Tra-1
O=[N+]([O-])OCCc1c(CO[N+](=O)[O-])nc([N+](=O)[O-])n1CO[N+](=O)[O-]	1.70262	7.93149	27.0474	89.291	190.545	c1c[nH]cn1	Imi
O=[N+]([O-])OCCN(c1ccnn1CO[N+](=O)[O-])[N+](=O)[O-]	1.67328	7.93116	26.2126	75.6917	167.033	c1cn[nH]c1	Pyr
CN(c1cnon1)[N+](=O)[O-]	1.63368	7.93065	25.4767	45.1814	161.56	c1cnon1	Oxa-1
CN(c1c([N+](=O)[O-])c(N(CCO[N+](=O)[O-])[N+](=O)[O-])nn1CCO[N+](=O)[O-])[N+](=O)[O-]	1.70244	7.93061	28.0692	132.081	192.019	c1cn[nH]c1	Pyr
O=[N+]([O-])OCCc1nn(CCO[N+](=O)[O-])c([N+](=O)[O-])c1[N+](=O)[O-]	1.69834	7.93033	26.5774	89.7977	198.182	c1cn[nH]c1	Pyr
O=[N+]([O-])OCCc1c([N+](=O)[O-])nc(CO[N+](=O)[O-])n1CO[N+](=O)[O-]	1.70991	7.92811	27.1884	89.1046	180.385	c1c[nH]cn1	Imi
CN(c1c(CO[N+](=O)[O-])c([N+](=O)[O-])nn1CCO[N+](=O)[O-])[N+](=O)[O-]	1.67236	7.92763	26.6264	108.211	195.624	c1cn[nH]c1	Pyr
CN(c1nc([N+](=O)[O-])n(CCO[N+](=O)[O-])c1N(C)[N+](=O)[O-])[N+](=O)[O-]	1.65971	7.92735	26.4826	126.947	192.76	c1c[nH]cn1	Imi
CN(c1ncno1)[N+](=O)[O-]	1.63951	7.92695	25.5371	43.0414	162.206	c1ncon1	Oxa-3
CN(c1c([N+](=O)[O-])nn(CO[N+](=O)[O-])c1CCO[N+](=O)[O-])[N+](=O)[O-]	1.67692	7.92679	26.5992	106.621	187.992	c1cn[nH]c1	Pyr
Cc1c(N(CCO[N+](=O)[O-])[N+](=O)[O-])nn(CO[N+](=O)[O-])c1[N+](=O)[O-]	1.68412	7.92656	27.3728	106.555	184.627	c1cn[nH]c1	Pyr
CN(c1nc([N+](=O)[O-])c(N(CCO[N+](=O)[O-])[N+](=O)[O-])n1C)[N+](=O)[O-]	1.65468	7.92654	26.7654	129.293	199.021	c1c[nH]cn1	Imi
CN(c1c([N+](=O)[O-])nc(N(CCO[N+](=O)[O-])[N+](=O)[O-])n1C)[N+](=O)[O-]	1.66127	7.92638	26.6823	125.637	192.142	c1c[nH]cn1	Imi
COc1nc([N+](=O)[O-])n(CO[N+](=O)[O-])c1[N+](=O)[O-]	1.72508	7.92592	28.9075	94.9185	188.277	c1c[nH]cn1	Imi
CN(c1nn(CO[N+](=O)[O-])c(N(C)[N+](=O)[O-])c1CO[N+](=O)[O-])[N+](=O)[O-]	1.66917	7.92539	27.2716	120.019	182.143	c1cn[nH]c1	Pyr
CN(c1c([N+](=O)[O-])nnn1C)[N+](=O)[O-]	1.62122	7.92496	25.3167	100.735	174.557	c1c[nH]nn1	Tra-1
Cc1nc([N+](=O)[O-])n(CO[N+](=O)[O-])c1N(CCO[N+](=O)[O-])[N+](=O)[O-]	1.67279	7.9244	27.4207	101.513	194.376	c1c[nH]cn1	Imi
O=[N+]([O-])OCc1cnn(CO[N+](=O)[O-])c1CO[N+](=O)[O-]	1.68162	7.92302	26.0487	74.5254	166.43	c1cn[nH]c1	Pyr
CN(c1nnn(CCO[N+](=O)[O-])c1N(C)[N+](=O)[O-])[N+](=O)[O-]	1.62275	7.92189	25.0458	99.0267	173.598	c1c[nH]nn1	Tra-1
O=[N+]([O-])OCCN(c1nn(CCO[N+](=O)[O-])c(N(CCO[N+](=O)[O-])[N+](=O)[O-])c1N(CCO[N+](=O)[O-])[N+](=O)[O-])[N+](=O)[O-]	1.74896	7.92167	29.9149	147.565	215.74	c1cn[nH]c1	Pyr
O=[N+]([O-])OCCN(c1ncnn1CCO[N+](=O)[O-])[N+](=O)[O-]	1.65999	7.92159	25.5139	61.7905	159.551	c1nc[nH]n1	Tra-4
O=[N+]([O-])OCCc1c(CO[N+](=O)[O-])nnn1CO[N+](=O)[O-]	1.66891	7.92152	25.4588	68.584	159.948	c1c[nH]nn1	Tra-1
Cn1nc(CO[N+](=O)[O-])c(N(CCO[N+](=O)[O-])[N+](=O)[O-])c1[N+](=O)[O-]	1.6749	7.92146	27.124	101.984	192.273	c1cn[nH]c1	Pyr
CN(c1c([N+](=O)[O-])nn(CCO[N+](=O)[O-])c1N(C)[N+](=O)[O-])[N+](=O)[O-]	1.65927	7.92077	26.282	129.143	191.393	c1cn[nH]c1	Pyr
O=[N+]([O-])OCCN(c1ccn(CO[N+](=O)[O-])n1)[N+](=O)[O-]	1.67266	7.92071	25.9713	78.0686	166.672	c1cn[nH]c1	Pyr
O=[N+]([O-])OCCn1c([N+](=O)[O-])nc(CO[N+](=O)[O-])c1CO[N+](=O)[O-]	1.70542	7.92061	27.1965	87.9266	183.406	c1c[nH]cn1	Imi
CN(c1ncn(CO[N+](=O)[O-])c1N(CCO[N+](=O)[O-])[N+](=O)[O-])[N+](=O)[O-]	1.67682	7.92003	27.3628	119.964	196.426	c1c[nH]cn1	Imi
O=[N+]([O-])OCc1cn(CO[N+](=O)[O-])nc1CO[N+](=O)[O-]	1.6825	7.91991	25.925	75.3953	164.024	c1cn[nH]c1	Pyr
CN(c1nc(CO[N+](=O)[O-])n(CO[N+](=O)[O-])c1N(C)[N+](=O)[O-])[N+](=O)[O-]	1.66727	7.91965	27.2018	119.891	187.357	c1c[nH]cn1	Imi
COc1c([N+](=O)[O-])nc([N+](=O)[O-])n1CO[N+](=O)[O-]	1.72729	7.91935	28.6239	98.0294	191.998	c1c[nH]cn1	Imi
CN(c1c(CCO[N+](=O)[O-])nn(CO[N+](=O)[O-])c1[N+](=O)[O-])[N+](=O)[O-]	1.67935	7.9191	26.8721	109.315	192.08	c1cn[nH]c1	Pyr
CN(c1c(CO[N+](=O)[O-])cnn1CO[N+](=O)[O-])[N+](=O)[O-]	1.64947	7.91901	25.742	90.1064	177.423	c1cn[nH]c1	Pyr
O=[N+]([O-])OCCc1nc(N(CCO[N+](=O)[O-])[N+](=O)[O-])n(CO[N+](=O)[O-])c1N(CCO[N+](=O)[O-])[N+](=O)[O-]	1.72678	7.91882	28.1751	117.875	195.66	c1c[nH]cn1	Imi
CN(c1c(N(CCO[N+](=O)[O-])[N+](=O)[O-])nn(C)c1[N+](=O)[O-])[N+](=O)[O-]	1.65742	7.91874	26.816	128.82	198.569	c1cn[nH]c1	Pyr
CN(c1ncon1)[N+](=O)[O-]	1.6368	7.91844	25.4789	47.7422	165.706	c1ncon1	Oxa-3
Cc1nnnn1CO[N+](=O)[O-]	1.5779	7.91813	23.8369	55.0725	161.655	c1nnn[nH]1	Tet-1
CN(c1nn(C)nc1[N+](=O)[O-])[N+](=O)[O-]	1.62056	7.91782	25.4328	99.2628	173.318	c1cn[nH]n1	Tra-2
CN(c1cnno1)[N+](=O)[O-]	1.63878	7.91767	25.5737	44.7071	163.102	c1conn1	Oxa-4
O=[N+]([O-])OCCN(c1cnn(CCO[N+](=O)[O-])n1)[N+](=O)[O-]	1.64995	7.91708	25.489	71.8769	166.297	c1cn[nH]n1	Tra-2
CN(c1nn(CCO[N+](=O)[O-])nc1CO[N+](=O)[O-])[N+](=O)[O-]	1.64319	7.91707	25.2713	73.0735	161.201	c1cn[nH]n1	Tra-2
O=[N+]([O-])OCc1cc(CO[N+](=O)[O-])n(CO[N+](=O)[O-])n1	1.68181	7.91669	25.9647	74.9834	165.71	c1cn[nH]c1	Pyr
O=[N+]([O-])OCCc1c(N(CCO[N+](=O)[O-])[N+](=O)[O-])nc(N(CCO[N+](=O)[O-])[N+](=O)[O-])n1CO[N+](=O)[O-]	1.72613	7.91605	28.293	106.08	183.67	c1c[nH]cn1	Imi
CN(c1nn(CCO[N+](=O)[O-])c(N(CCO[N+](=O)[O-])[N+](=O)[O-])c1[N+](=O)[O-])[N+](=O)[O-]	1.69905	7.91581	28.1662	136.662	209.14	c1cn[nH]c1	Pyr
CN(c1nnco1)[N+](=O)[O-]	1.64229	7.91567	25.5354	50.4766	167.911	c1nnco1	Oxa-2
CN(c1nc(CO[N+](=O)[O-])nn1CCO[N+](=O)[O-])[N+](=O)[O-]	1.64391	7.9155	25.3488	72.4758	160.521	c1nc[nH]n1	Tra-4
O=[N+]([O-])OCCN(c1nccn1CO[N+](=O)[O-])[N+](=O)[O-]	1.67178	7.91521	26.0987	74.5989	166.5	c1c[nH]cn1	Imi
O=[N+]([O-])OCCN(c1nn(CCO[N+](=O)[O-])nc1CO[N+](=O)[O-])[N+](=O)[O-]	1.69314	7.9137	26.8766	88.9656	168.103	c1cn[nH]n1	Tra-2
O=[N+]([O-])OCCN(c1nc([N+](=O)[O-])cn1CCO[N+](=O)[O-])[N+](=O)[O-]	1.6845	7.91318	26.9143	100.063	197.495	c1c[nH]cn1	Imi
CN(c1nc(N(CCO[N+](=O)[O-])[N+](=O)[O-])c(N(CCO[N+](=O)[O-])[N+](=O)[O-])n1CCO[N+](=O)[O-])[N+](=O)[O-]	1.69451	7.91284	28.6338	144.118	222.71	c1c[nH]cn1	Imi
CN(c1cn(CO[N+](=O)[O-])c(N(CCO[N+](=O)[O-])[N+](=O)[O-])n1)[N+](=O)[O-]	1.6746	7.91242	27.6228	124.718	205.365	c1c[nH]cn1	Imi
CN(c1nnc(N(CCO[N+](=O)[O-])[N+](=O)[O-])n1C)[N+](=O)[O-]	1.61674	7.91206	25.3422	103.2	180.114	c1nnc[nH]1	Tra-3
CN(c1conn1)[N+](=O)[O-]	1.63792	7.9118	25.5523	48.5528	165.669	c1conn1	Oxa-4
CN(c1nc(CO[N+](=O)[O-])n(CO[N+](=O)[O-])c1CO[N+](=O)[O-])[N+](=O)[O-]	1.68634	7.91138	27.4735	105.259	189.715	c1c[nH]cn1	Imi
CN(c1nc(N(C)[N+](=O)[O-])n(CO[N+](=O)[O-])c1N(C)[N+](=O)[O-])[N+](=O)[O-]	1.65722	7.91035	27.0881	151.631	198.334	c1c[nH]cn1	Imi
CN(c1nn(CO[N+](=O)[O-])c(CO[N+](=O)[O-])c1CO[N+](=O)[O-])[N+](=O)[O-]	1.68816	7.90982	27.3067	107.859	175.226	c1cn[nH]c1	Pyr
O=[N+]([O-])OCCn1c(CO[N+](=O)[O-])nc([N+](=O)[O-])c1CO[N+](=O)[O-]	1.70629	7.90976	26.8891	93.296	183.864	c1c[nH]cn1	Imi
Cn1nnnc1CO[N+](=O)[O-]	1.58327	7.90943	23.6449	61.2029	164.334	c1nnn[nH]1	Tet-1
O=[N+]([O-])OCCc1nc(CO[N+](=O)[O-])n(CO[N+](=O)[O-])n1	1.67018	7.90938	25.5078	63.7759	156.239	c1nc[nH]n1	Tra-4
CN(c1nn(CCO[N+](=O)[O-])nc1N(C)[N+](=O)[O-])[N+](=O)[O-]	1.6255	7.90921	25.1802	96.4673	171.228	c1cn[nH]n1	Tra-2
CN(c1cc(N(CCO[N+](=O)[O-])[N+](=O)[O-])n(CO[N+](=O)[O-])n1)[N+](=O)[O-]	1.67972	7.90839	27.4744	121.537	189.664	c1cn[nH]c1	Pyr
O=[N+]([O-])OCCc1nnn(CCO[N+](=O)[O-])c1[N+](=O)[O-]	1.65079	7.90797	24.6627	81.579	180.174	c1c[nH]nn1	Tra-1
COc1nc([N+](=O)[O-])c([N+](=O)[O-])n1CO[N+](=O)[O-]	1.7181	7.90708	28.4194	89.6971	187.196	c1c[nH]cn1	Imi
Cn1nnc(N(CCO[N+](=O)[O-])[N+](=O)[O-])c1CO[N+](=O)[O-]	1.63036	7.90706	25.4347	83.2339	173.385	c1c[nH]nn1	Tra-1
CN(c1nc([N+](=O)[O-])n(CCO[N+](=O)[O-])c1CO[N+](=O)[O-])[N+](=O)[O-]	1.67693	7.90674	26.7265	103.79	185.357	c1c[nH]cn1	Imi
COc1c([N+](=O)[O-])c([N+](=O)[O-])nn1CO[N+](=O)[O-]	1.72143	7.90618	28.3952	97.2116	191.918	c1cn[nH]c1	Pyr
CN(c1c([N+](=O)[O-])nc(CCO[N+](=O)[O-])n1CO[N+](=O)[O-])[N+](=O)[O-]	1.67743	7.906	26.5905	105.742	185.43	c1c[nH]cn1	Imi
CN(c1nn(CCO[N+](=O)[O-])c([N+](=O)[O-])c1N(C)[N+](=O)[O-])[N+](=O)[O-]	1.66279	7.90587	26.7539	126.499	194.947	c1cn[nH]c1	Pyr
CN(c1c(N(CCO[N+](=O)[O-])[N+](=O)[O-])nnn1C)[N+](=O)[O-]	1.62364	7.90507	25.5929	95.0891	173.371	c1c[nH]nn1	Tra-1
O=[N+]([O-])OCCc1c(CO[N+](=O)[O-])c([N+](=O)[O-])nn1CO[N+](=O)[O-]	1.70633	7.90427	27.0642	98.9834	189.264	c1cn[nH]c1	Pyr
Cn1c(N(CCO[N+](=O)[O-])[N+](=O)[O-])nc(CO[N+](=O)[O-])c1N(CCO[N+](=O)[O-])[N+](=O)[O-]	1.66906	7.90355	26.8025	103.375	186.402	c1c[nH]cn1	Imi
Cn1nnc(CO[N+](=O)[O-])n1	1.5823	7.90346	23.6327	69.4552	167.983	c1nn[nH]n1	Tet-2
O=[N+]([O-])OCCc1nc(CO[N+](=O)[O-])c([N+](=O)[O-])n1CO[N+](=O)[O-]	1.71042	7.9023	27.2903	96.5795	185.514	c1c[nH]cn1	Imi
Cc1nc(N(CCO[N+](=O)[O-])[N+](=O)[O-])n(CO[N+](=O)[O-])c1N(CCO[N+](=O)[O-])[N+](=O)[O-]	1.67236	7.90225	27.0853	100.48	185.8	c1c[nH]cn1	Imi
Cc1c([N+](=O)[O-])nc(N(CCO[N+](=O)[O-])[N+](=O)[O-])n1CO[N+](=O)[O-]	1.67797	7.90224	27.0846	105.773	185.729	c1c[nH]cn1	Imi
CN(c1nc(CCO[N+](=O)[O-])n(CO[N+](=O)[O-])c1[N+](=O)[O-])[N+](=O)[O-]	1.6811	7.90127	26.9223	103.014	185.93	c1c[nH]cn1	Imi
Cn1c([N+](=O)[O-])nc(CO[N+](=O)[O-])c1N(CCO[N+](=O)[O-])[N+](=O)[O-]	1.67146	7.90073	26.9834	103.741	194.211	c1c[nH]cn1	Imi
Cc1nn(CO[N+](=O)[O-])c(N(CCO[N+](=O)[O-])[N+](=O)[O-])c1[N+](=O)[O-]	1.67878	7.90064	27.3382	106.433	196.234	c1cn[nH]c1	Pyr
O=[N+]([O-])OCc1cn(CO[N+](=O)[O-])c(CO[N+](=O)[O-])n1	1.67983	7.8983	25.8319	75.6023	166.882	c1c[nH]cn1	Imi
Cn1nc(CO[N+](=O)[O-])nc1N(CCO[N+](=O)[O-])[N+](=O)[O-]	1.63815	7.8981	25.5739	74.3818	162.638	c1nc[nH]n1	Tra-4
O=[N+]([O-])OCCn1nc(CO[N+](=O)[O-])nc1CO[N+](=O)[O-]	1.66682	7.89799	25.2604	66.282	159.251	c1nc[nH]n1	Tra-4
COc1nc([N+](=O)[O-])n(CO[N+](=O)[O-])n1	1.68019	7.89729	27.2819	72.4581	173.421	c1nc[nH]n1	Tra-4
O=[N+]([O-])OCCc1cnn(CO[N+](=O)[O-])c1[N+](=O)[O-]	1.66832	7.89705	25.3812	92.0646	190.236	c1cn[nH]c1	Pyr
O=[N+]([O-])OCCN(c1cn(CO[N+](=O)[O-])cn1)[N+](=O)[O-]	1.66538	7.89676	25.6904	79.2924	171.148	c1c[nH]cn1	Imi
O=[N+]([O-])OCCN(c1cn(CCO[N+](=O)[O-])nn1)[N+](=O)[O-]	1.64919	7.89655	25.1676	71.2803	165.645	c1c[nH]nn1	Tra-1
CN(c1nn(C)c([N+](=O)[O-])c1N(CCO[N+](=O)[O-])[N+](=O)[O-])[N+](=O)[O-]	1.66203	7.89615	27.0687	124.517	193.127	c1cn[nH]c1	Pyr
CN(c1nc(CO[N+](=O)[O-])cn1CO[N+](=O)[O-])[N+](=O)[O-]	1.65499	7.89566	25.7163	85.4988	172.621	c1c[nH]cn1	Imi
COc1nnn(CO[N+](=O)[O-])c1[N+](=O)[O-]	1.68237	7.89542	27.2066	78.7219	178.769	c1c[nH]nn1	Tra-1
O=[N+]([O-])OCCc1nnc(CO[N+](=O)[O-])n1CO[N+](=O)[O-]	1.66915	7.89458	25.4316	63.9131	156.744	c1nnc[nH]1	Tra-3
Cn1c([N+](=O)[O-])nc(N(CCO[N+](=O)[O-])[N+](=O)[O-])c1CO[N+](=O)[O-]	1.67424	7.89376	26.9128	105.328	185.922	c1c[nH]cn1	Imi
Cc1nc([N+](=O)[O-])c(N(CCO[N+](=O)[O-])[N+](=O)[O-])n1CO[N+](=O)[O-]	1.67158	7.89356	27.1039	104.517	193.683	c1c[nH]cn1	Imi
CN(c1c(CO[N+](=O)[O-])ncn1CO[N+](=O)[O-])[N+](=O)[O-]	1.64692	7.89335	25.6636	91.4137	178.575	c1c[nH]cn1	Imi
COc1nn(CO[N+](=O)[O-])nc1[N+](=O)[O-]	1.68118	7.89278	27.072	78.0281	177.104	c1cn[nH]n1	Tra-2
O=[N+]([O-])OCc1ncn(CO[N+](=O)[O-])c1CO[N+](=O)[O-]	1.67976	7.8912	25.943	75.0721	168.706	c1c[nH]cn1	Imi
Cn1nc(N(CCO[N+](=O)[O-])[N+](=O)[O-])nc1CO[N+](=O)[O-]	1.63232	7.89102	25.3767	80.0058	169.038	c1nc[nH]n1	Tra-4
CN(c1nc(N(C)[N+](=O)[O-])n(CCO[N+](=O)[O-])c1[N+](=O)[O-])[N+](=O)[O-]	1.66417	7.891	26.5416	128.646	188.372	c1c[nH]cn1	Imi
Cc1c(N(CCO[N+](=O)[O-])[N+](=O)[O-])nn(CO[N+](=O)[O-])c1N(CCO[N+](=O)[O-])[N+](=O)[O-]	1.66911	7.89027	26.9561	114.664	198.565	c1cn[nH]c1	Pyr
CN(c1c(N(CCO[N+](=O)[O-])[N+](=O)[O-])nc([N+](=O)[O-])n1C)[N+](=O)[O-]	1.6606	7.88948	26.6946	127.873	188.617	c1c[nH]cn1	Imi
CN(c1nc(N(C)[N+](=O)[O-])n(CO[N+](=O)[O-])c1CO[N+](=O)[O-])[N+](=O)[O-]	1.66601	7.88931	27.1194	124.993	181.061	c1c[nH]cn1	Imi
Cc1nn(CO[N+](=O)[O-])c([N+](=O)[O-])c1CO[N+](=O)[O-]	1.6624	7.8888	25.9472	94.3837	189.921	c1cn[nH]c1	Pyr
O=[N+]([O-])OCCN(c1nn(CCO[N+](=O)[O-])cc1[N+](=O)[O-])[N+](=O)[O-]	1.69381	7.88817	26.8335	100.045	192.068	c1cn[nH]c1	Pyr
O=[N+]([O-])OCCc1nn(CO[N+](=O)[O-])c(N(CCO[N+](=O)[O-])[N+](=O)[O-])c1N(CCO[N+](=O)[O-])[N+](=O)[O-]	1.72898	7.88748	28.1392	130.113	205.104	c1cn[nH]c1	Pyr
O=[N+]([O-])OCCN(c1c([N+](=O)[O-])ncn1CCO[N+](=O)[O-])[N+](=O)[O-]	1.68606	7.8866	26.8816	98.3769	194.674	c1c[nH]cn1	Imi
CN(c1nc([N+](=O)[O-])n(C)c1N(CCO[N+](=O)[O-])[N+](=O)[O-])[N+](=O)[O-]	1.65529	7.88641	26.7365	128.818	198.998	c1c[nH]cn1	Imi
CN(c1nn(CCO[N+](=O)[O-])c(N(C)[N+](=O)[O-])c1[N+](=O)[O-])[N+](=O)[O-]	1.66453	7.88556	26.4653	127.32	188.112	c1cn[nH]c1	Pyr
CN(c1nnn(CCO[N+](=O)[O-])c1CO[N+](=O)[O-])[N+](=O)[O-]	1.64317	7.88471	25.3825	72.8936	160.176	c1c[nH]nn1	Tra-1
O=[N+]([O-])OCCc1ncn(CO[N+](=O)[O-])c1[N+](=O)[O-]	1.6639	7.88423	25.1639	90.2339	191.092	c1c[nH]cn1	Imi
CN(c1nnc(CCO[N+](=O)[O-])n1CO[N+](=O)[O-])[N+](=O)[O-]	1.63863	7.88255	25.3552	78.4363	166.893	c1nnc[nH]1	Tra-3
CN(c1nc(N(CCO[N+](=O)[O-])[N+](=O)[O-])nn1C)[N+](=O)[O-]	1.62308	7.88202	25.441	95.7012	167.252	c1nc[nH]n1	Tra-4
CN(c1nc(N(CCO[N+](=O)[O-])[N+](=O)[O-])n(C)c1[N+](=O)[O-])[N+](=O)[O-]	1.66021	7.88028	26.7287	131.503	192.854	c1c[nH]cn1	Imi
CN(c1nc([N+](=O)[O-])n(CO[N+](=O)[O-])c1CCO[N+](=O)[O-])[N+](=O)[O-]	1.67603	7.8799	26.8735	109.896	186.48	c1c[nH]cn1	Imi
CN(c1nc(N(CCO[N+](=O)[O-])[N+](=O)[O-])n(CCO[N+](=O)[O-])c1N(CCO[N+](=O)[O-])[N+](=O)[O-])[N+](=O)[O-]	1.69907	7.87986	28.3274	137.849	211.713	c1c[nH]cn1	Imi
O=[N+]([O-])OCCc1onnc1CO[N+](=O)[O-]	1.66627	7.87925	24.9226	55.6339	169.027	c1conn1	Oxa-4
CN(c1nc(N(CCO[N+](=O)[O-])[N+](=O)[O-])c([N+](=O)[O-])n1C)[N+](=O)[O-]	1.6623	7.87898	26.7561	129.005	188.078	c1c[nH]cn1	Imi
COc1nc([N+](=O)[O-])nn1CO[N+](=O)[O-]	1.67888	7.87885	27.0596	73.2782	173.202	c1nc[nH]n1	Tra-4
O=[N+]([O-])OCCN(c1nn(CCO[N+](=O)[O-])c(N(CCO[N+](=O)[O-])[N+](=O)[O-])c1CO[N+](=O)[O-])[N+](=O)[O-]	1.72502	7.87872	28.4764	121.498	200.21	c1cn[nH]c1	Pyr
Cc1c([N+](=O)[O-])c(N(CCO[N+](=O)[O-])[N+](=O)[O-])nn1CO[N+](=O)[O-]	1.67911	7.87867	27.1396	108.389	185.809	c1cn[nH]c1	Pyr
Cc1noc([N+](=O)[O-])n1	1.64865	7.87773	25.1985	63.3969	201.844	c1ncon1	Oxa-3
CN(c1cc(CO[N+](=O)[O-])nn1CO[N+](=O)[O-])[N+](=O)[O-]	1.65403	7.87756	25.8617	86.9168	174.91	c1cn[nH]c1	Pyr
CN(c1c(CCO[N+](=O)[O-])c(N(CCO[N+](=O)[O-])[N+](=O)[O-])nn1CO[N+](=O)[O-])[N+](=O)[O-]	1.67331	7.87745	26.8473	108.782	192.41	c1cn[nH]c1	Pyr
O=[N+]([O-])OCCN(c1cc([N+](=O)[O-])nn1CCO[N+](=O)[O-])[N+](=O)[O-]	1.6855	7.87739	26.7936	108.303	206.845	c1cn[nH]c1	Pyr
O=[N+]([O-])OCCc1nc(CO[N+](=O)[O-])c(N(CCO[N+](=O)[O-])[N+](=O)[O-])n1CO[N+](=O)[O-]	1.69808	7.87498	26.6601	94.964	175.858	c1c[nH]cn1	Imi
O=[N+]([O-])OCCN(c1cnn(CO[N+](=O)[O-])c1)[N+](=O)[O-]	1.6661	7.8749	25.9311	80.0476	177.068	c1cn[nH]c1	Pyr
Cn1c(CO[N+](=O)[O-])nc(N(CCO[N+](=O)[O-])[N+](=O)[O-])c1[N+](=O)[O-]	1.67804	7.87476	27.0079	105.598	183.463	c1c[nH]cn1	Imi
Cc1c(CO[N+](=O)[O-])nn(CO[N+](=O)[O-])c1[N+](=O)[O-]	1.65717	7.87451	25.7785	93.7684	193.143	c1cn[nH]c1	Pyr
O=[N+]([O-])OCCN(c1cncn1CO[N+](=O)[O-])[N+](=O)[O-]	1.6553	7.87443	26.057	88.4453	179.181	c1c[nH]cn1	Imi
CN(c1nc(N(CCO[N+](=O)[O-])[N+](=O)[O-])n(C)c1N(CCO[N+](=O)[O-])[N+](=O)[O-])[N+](=O)[O-]	1.65709	7.87406	26.7908	127.688	203.836	c1c[nH]cn1	Imi
Cc1nnc([N+](=O)[O-])o1	1.64992	7.87337	25.1634	61.9984	201.649	c1nnco1	Oxa-2
O=[N+]([O-])OCCc1cc([N+](=O)[O-])n(CO[N+](=O)[O-])n1	1.66948	7.87322	25.4852	85.2755	193.512	c1cn[nH]c1	Pyr
CN(c1c([N+](=O)[O-])nn(CCO[N+](=O)[O-])c1CO[N+](=O)[O-])[N+](=O)[O-]	1.67574	7.87305	26.6651	106.472	186.879	c1cn[nH]c1	Pyr
O=[N+]([O-])OCCc1nn(CO[N+](=O)[O-])cc1[N+](=O)[O-]	1.66944	7.87303	25.2292	87.3997	191.415	c1cn[nH]c1	Pyr
CN(c1c(N(CCO[N+](=O)[O-])[N+](=O)[O-])nn(CCO[N+](=O)[O-])c1N(CCO[N+](=O)[O-])[N+](=O)[O-])[N+](=O)[O-]	1.69959	7.87253	28.3014	136.808	210.577	c1cn[nH]c1	Pyr
CN(c1c(N(CCO[N+](=O)[O-])[N+](=O)[O-])nn(C)c1N(CCO[N+](=O)[O-])[N+](=O)[O-])[N+](=O)[O-]	1.64715	7.87249	27.245	138.746	219.556	c1cn[nH]c1	Pyr
O=[N+]([O-])OCCc1nc([N+](=O)[O-])n(CCO[N+](=O)[O-])n1	1.65244	7.87244	24.6685	70.1065	179.541	c1nc[nH]n1	Tra-4
O=[N+]([O-])OCCc1noc(CO[N+](=O)[O-])n1	1.66677	7.87213	24.9404	56.5359	168.076	c1ncon1	Oxa-3
O=[N+]([O-])OCCn1ncc(CO[N+](=O)[O-])c1[N+](=O)[O-]	1.66819	7.87205	25.2053	92.1882	190.864	c1cn[nH]c1	Pyr
Cn1c(N(CCO[N+](=O)[O-])[N+](=O)[O-])nc(N(CCO[N+](=O)[O-])[N+](=O)[O-])c1N(CCO[N+](=O)[O-])[N+](=O)[O-]	1.69635	7.87203	28.4154	139.459	213.374	c1c[nH]cn1	Imi
O=[N+]([O-])OCCn1c(CO[N+](=O)[O-])nnc1CO[N+](=O)[O-]	1.66674	7.87182	25.4006	67.2081	160.304	c1nnc[nH]1	Tra-3
O=[N+]([O-])OCCN(c1nc(CO[N+](=O)[O-])c(N(CCO[N+](=O)[O-])[N+](=O)[O-])n1CCO[N+](=O)[O-])[N+](=O)[O-]	1.72745	7.87151	28.225	105.684	180.578	c1c[nH]cn1	Imi
COc1c([N+](=O)[O-])nnn1CO[N+](=O)[O-]	1.67363	7.87142	26.7555	79.9556	178.921	c1c[nH]nn1	Tra-1
Cc1nc([N+](=O)[O-])no1	1.65066	7.87132	25.1793	68.2229	205.714	c1ncon1	Oxa-3
Cn1nc([N+](=O)[O-])c(N(CCO[N+](=O)[O-])[N+](=O)[O-])c1CO[N+](=O)[O-]	1.66944	7.86943	26.8495	108.148	194.455	c1cn[nH]c1	Pyr
O=[N+]([O-])OCCc1nn(CCO[N+](=O)[O-])nc1[N+](=O)[O-]	1.65012	7.86907	24.632	71.3964	181.357	c1cn[nH]n1	Tra-2
CN(c1nc(N(CCO[N+](=O)[O-])[N+](=O)[O-])n(C)n1)[N+](=O)[O-]	1.61276	7.86799	25.2838	107.766	181.599	c1nc[nH]n1	Tra-4
CN(c1nc(CCO[N+](=O)[O-])no1)[N+](=O)[O-]	1.63172	7.86721	24.4428	56.2964	168.062	c1ncon1	Oxa-3
O=[N+]([O-])OCCc1nnc(CO[N+](=O)[O-])o1	1.66385	7.866	24.8737	59.0909	173.241	c1nnco1	Oxa-2
Cc1nonc1N(CCO[N+](=O)[O-])[N+](=O)[O-]	1.63004	7.86583	25.0537	55.2334	166.646	c1cnon1	Oxa-1
O=[N+]([O-])OCCn1nc(CO[N+](=O)[O-])cc1[N+](=O)[O-]	1.67014	7.86542	25.3035	88.6237	192.408	c1cn[nH]c1	Pyr
CN(c1cnn(CO[N+](=O)[O-])c1N(C)[N+](=O)[O-])[N+](=O)[O-]	1.63768	7.86537	25.7284	110.055	185.283	c1cn[nH]c1	Pyr
Cn1nc(N(CCO[N+](=O)[O-])[N+](=O)[O-])c(N(CCO[N+](=O)[O-])[N+](=O)[O-])c1N(CCO[N+](=O)[O-])[N+](=O)[O-]	1.69579	7.86519	28.5453	143.323	216.425	c1cn[nH]c1	Pyr
O=[N+]([O-])OCCc1nnoc1CO[N+](=O)[O-]	1.66733	7.86453	25.0519	51.4527	168.91	c1conn1	Oxa-4
CN(c1c(N(CCO[N+](=O)[O-])[N+](=O)[O-])c(N(CCO[N+](=O)[O-])[N+](=O)[O-])nn1CCO[N+](=O)[O-])[N+](=O)[O-]	1.69602	7.86423	28.6248	145.598	223.036	c1cn[nH]c1	Pyr
O=[N+]([O-])OCCc1nc(N(CCO[N+](=O)[O-])[N+](=O)[O-])n(CCO[N+](=O)[O-])c1[N+](=O)[O-]	1.68529	7.86395	26.5051	91.4491	183.426	c1c[nH]cn1	Imi
Cn1c(N(CCO[N+](=O)[O-])[N+](=O)[O-])nc(CO[N+](=O)[O-])c1[N+](=O)[O-]	1.68112	7.86393	27.1801	107.37	182.72	c1c[nH]cn1	Imi
CN(c1c([N+](=O)[O-])c(CO[N+](=O)[O-])nn1CCO[N+](=O)[O-])[N+](=O)[O-]	1.68006	7.86387	26.733	108.572	186.261	c1cn[nH]c1	Pyr
O=[N+]([O-])OCCc1nc(CO[N+](=O)[O-])no1	1.6667	7.86324	25.0152	53.3564	168.513	c1ncon1	Oxa-3
CN(c1c([N+](=O)[O-])nn(C)c1N(CCO[N+](=O)[O-])[N+](=O)[O-])[N+](=O)[O-]	1.65623	7.86278	26.7519	130.138	194.904	c1cn[nH]c1	Pyr
CN(c1cnc(CO[N+](=O)[O-])n1CO[N+](=O)[O-])[N+](=O)[O-]	1.64957	7.86254	25.7636	90.3134	178.898	c1c[nH]cn1	Imi
Cn1nc(CO[N+](=O)[O-])c([N+](=O)[O-])c1CO[N+](=O)[O-]	1.65777	7.8623	25.4292	95.0687	186.772	c1cn[nH]c1	Pyr
CN(c1nn(CO[N+](=O)[O-])cc1CO[N+](=O)[O-])[N+](=O)[O-]	1.65255	7.86141	25.7676	87.6488	175.114	c1cn[nH]c1	Pyr
O=[N+]([O-])OCCN(c1nc(CO[N+](=O)[O-])n(CCO[N+](=O)[O-])c1N(CCO[N+](=O)[O-])[N+](=O)[O-])[N+](=O)[O-]	1.72685	7.86137	28.2069	104.224	178.458	c1c[nH]cn1	Imi
Cc1c(CO[N+](=O)[O-])nc([N+](=O)[O-])n1CO[N+](=O)[O-]	1.65202	7.86133	25.4784	93.6834	192.288	c1c[nH]cn1	Imi
Cc1noc(N(CCO[N+](=O)[O-])[N+](=O)[O-])n1	1.63018	7.86127	25.0538	47.2766	163.333	c1ncon1	Oxa-3
O=[N+]([O-])OCCc1nn(CCO[N+](=O)[O-])c([N+](=O)[O-])c1N(CCO[N+](=O)[O-])[N+](=O)[O-]	1.68697	7.86126	26.3989	90.3981	182.417	c1cn[nH]c1	Pyr
COc1nnc([N+](=O)[O-])n1CO[N+](=O)[O-]	1.67036	7.86123	27.5318	74.3921	166.749	c1nnc[nH]1	Tra-3
Cc1onnc1N(CCO[N+](=O)[O-])[N+](=O)[O-]	1.62789	7.86123	24.8855	56.8627	168.757	c1conn1	Oxa-4
O=[N+]([O-])OCCc1nonc1CO[N+](=O)[O-]	1.66773	7.8612	25.0996	49.8984	166.313	c1cnon1	Oxa-1
Cc1nc(CO[N+](=O)[O-])c([N+](=O)[O-])n1CO[N+](=O)[O-]	1.66317	7.86073	25.8071	95.335	189.679	c1c[nH]cn1	Imi
O=[N+]([O-])OCCc1c([N+](=O)[O-])nc([N+](=O)[O-])n1CCO[N+](=O)[O-]	1.69308	7.86001	26.5074	100.021	208.984	c1c[nH]cn1	Imi
Cn1c([N+](=O)[O-])cnc1[N+](=O)[O-]	1.6628	7.85992	25.2715	111.668	238.018	c1c[nH]cn1	Imi
CN(c1cc(CO[N+](=O)[O-])n(CO[N+](=O)[O-])n1)[N+](=O)[O-]	1.65527	7.85966	25.9847	86.021	174.029	c1cn[nH]c1	Pyr
Cc1nn(CO[N+](=O)[O-])nc1N(CCO[N+](=O)[O-])[N+](=O)[O-]	1.63393	7.85841	25.8817	87.1438	169.617	c1cn[nH]n1	Tra-2
CN(c1cn(CO[N+](=O)[O-])nc1N(C)[N+](=O)[O-])[N+](=O)[O-]	1.63793	7.8583	25.6328	109.884	184.46	c1cn[nH]c1	Pyr
CN(c1nc(CO[N+](=O)[O-])n(CCO[N+](=O)[O-])c1[N+](=O)[O-])[N+](=O)[O-]	1.67803	7.85829	26.7605	109.161	186.264	c1c[nH]cn1	Imi
CN(c1onnc1CCO[N+](=O)[O-])[N+](=O)[O-]	1.63568	7.85808	24.6087	57.1175	167.128	c1conn1	Oxa-4
O=[N+]([O-])OCc1cnc(CO[N+](=O)[O-])n1CO[N+](=O)[O-]	1.67491	7.85802	25.9186	83.7126	181.001	c1c[nH]cn1	Imi
O=[N+]([O-])OCCc1cn(CO[N+](=O)[O-])c([N+](=O)[O-])n1	1.65871	7.85777	25.0305	85.393	193.48	c1c[nH]cn1	Imi
Cn1nc(N(CCO[N+](=O)[O-])[N+](=O)[O-])c(N(CCO[N+](=O)[O-])[N+](=O)[O-])c1CO[N+](=O)[O-]	1.67073	7.85762	26.8456	102.445	185.513	c1cn[nH]c1	Pyr
Cc1c(CO[N+](=O)[O-])c([N+](=O)[O-])nn1CO[N+](=O)[O-]	1.65979	7.85741	25.6317	94.2017	189.784	c1cn[nH]c1	Pyr
CN(c1c([N+](=O)[O-])nc(CO[N+](=O)[O-])n1CCO[N+](=O)[O-])[N+](=O)[O-]	1.67342	7.85716	26.6148	107.287	192.473	c1c[nH]cn1	Imi
O=[N+]([O-])OCCc1cn(CO[N+](=O)[O-])nc1[N+](=O)[O-]	1.66894	7.85536	25.2222	86.1636	190.873	c1cn[nH]c1	Pyr
CN(c1c(N(CCO[N+](=O)[O-])[N+](=O)[O-])nn(CCO[N+](=O)[O-])c1CO[N+](=O)[O-])[N+](=O)[O-]	1.67016	7.85453	26.5964	108.831	192.187	c1cn[nH]c1	Pyr
Cc1nonc1[N+](=O)[O-]	1.63214	7.85451	25.2905	56.5505	190.829	c1cnon1	Oxa-1
CN(c1nc([N+](=O)[O-])c(CCO[N+](=O)[O-])n1CO[N+](=O)[O-])[N+](=O)[O-]	1.67427	7.85374	26.7528	114.044	196.545	c1c[nH]cn1	Imi
O=[N+]([O-])OCCc1nc(CO[N+](=O)[O-])nn1CO[N+](=O)[O-]	1.66773	7.8533	25.6151	68.6168	159.287	c1nc[nH]n1	Tra-4
CN(c1ncn(CO[N+](=O)[O-])c1N(C)[N+](=O)[O-])[N+](=O)[O-]	1.63158	7.85303	25.5534	114.313	190.426	c1c[nH]cn1	Imi
CN(c1cc(N(C)[N+](=O)[O-])n(CO[N+](=O)[O-])n1)[N+](=O)[O-]	1.63514	7.85256	25.6703	113.146	186.237	c1cn[nH]c1	Pyr
O=[N+]([O-])OCCc1c(N(CCO[N+](=O)[O-])[N+](=O)[O-])c(CO[N+](=O)[O-])nn1CO[N+](=O)[O-]	1.69933	7.85247	26.69	105.393	186.657	c1cn[nH]c1	Pyr
Cc1nc([N+](=O)[O-])n(CO[N+](=O)[O-])c1CO[N+](=O)[O-]	1.65334	7.85216	25.7707	91.6282	192.248	c1c[nH]cn1	Imi
CN(c1nnn(C)c1N(CCO[N+](=O)[O-])[N+](=O)[O-])[N+](=O)[O-]	1.61199	7.85191	25.3082	109.842	184.467	c1c[nH]nn1	Tra-1
Cc1nnoc1[N+](=O)[O-]	1.62457	7.85163	25.1613	42.8994	183.198	c1conn1	Oxa-4
CN(c1nnn(C)n1)[N+](=O)[O-]	1.56204	7.8512	23.117	59.602	151.07	c1nn[nH]n1	Tet-2
Cc1nnoc1N(CCO[N+](=O)[O-])[N+](=O)[O-]	1.63173	7.85103	25.0921	49.5089	161.47	c1conn1	Oxa-4
Cc1onnc1[N+](=O)[O-]	1.63329	7.85089	25.2252	54.9216	190.967	c1conn1	Oxa-4
CN(c1nonc1CCO[N+](=O)[O-])[N+](=O)[O-]	1.63451	7.85059	24.7064	54.7636	163.582	c1cnon1	Oxa-1
O=[N+]([O-])OCCn1cnc(CO[N+](=O)[O-])c1[N+](=O)[O-]	1.65689	7.84952	24.9691	94.5041	190.922	c1c[nH]cn1	Imi
CN(c1nn(C)c(N(CCO[N+](=O)[O-])[N+](=O)[O-])c1N(CCO[N+](=O)[O-])[N+](=O)[O-])[N+](=O)[O-]	1.648	7.84935	27.1686	139.872	219.499	c1cn[nH]c1	Pyr
O=[N+]([O-])OCCc1c(CO[N+](=O)[O-])nn(CO[N+](=O)[O-])c1N(CCO[N+](=O)[O-])[N+](=O)[O-]	1.70414	7.84885	26.9402	98.7035	182.792	c1cn[nH]c1	Pyr
O=[N+]([O-])OCCN(c1cnn(CCO[N+](=O)[O-])c1N(CCO[N+](=O)[O-])[N+](=O)[O-])[N+](=O)[O-]	1.69534	7.84872	26.9695	97.0439	183.672	c1cn[nH]c1	Pyr
Cn1nc([N+](=O)[O-])cc1[N+](=O)[O-]	1.6658	7.84852	25.5031	107.723	236.562	c1cn[nH]c1	Pyr
CN(c1cn(CO[N+](=O)[O-])c(CO[N+](=O)[O-])n1)[N+](=O)[O-]	1.65351	7.84837	25.8086	86.3439	174.236	c1c[nH]cn1	Imi
CN(c1noc(CCO[N+](=O)[O-])n1)[N+](=O)[O-]	1.63701	7.84832	24.6167	57.6764	168.567	c1ncon1	Oxa-3
Cc1nn(CO[N+](=O)[O-])c(N(CCO[N+](=O)[O-])[N+](=O)[O-])c1N(CCO[N+](=O)[O-])[N+](=O)[O-]	1.66928	7.8476	27.1245	122.562	207.204	c1cn[nH]c1	Pyr
CN(c1cnn(CO[N+](=O)[O-])c1CO[N+](=O)[O-])[N+](=O)[O-]	1.64586	7.84755	25.6888	96.9618	184.84	c1cn[nH]c1	Pyr
O=[N+]([O-])OCCN(c1cc(N(CCO[N+](=O)[O-])[N+](=O)[O-])n(CCO[N+](=O)[O-])n1)[N+](=O)[O-]	1.69726	7.84696	26.8571	96.8634	181.449	c1cn[nH]c1	Pyr
O=[N+]([O-])OCCc1c(N(CCO[N+](=O)[O-])[N+](=O)[O-])nc(CO[N+](=O)[O-])n1CO[N+](=O)[O-]	1.70355	7.84625	26.5829	84.4061	165.135	c1c[nH]cn1	Imi
CN(c1cn(CO[N+](=O)[O-])c(N(C)[N+](=O)[O-])n1)[N+](=O)[O-]	1.64295	7.84492	25.775	106.606	181.671	c1c[nH]cn1	Imi
Cc1nnc(N(CCO[N+](=O)[O-])[N+](=O)[O-])o1	1.63353	7.84429	25.0832	49.5014	166.178	c1nnco1	Oxa-2
CN(c1nn(CCO[N+](=O)[O-])c(CO[N+](=O)[O-])c1[N+](=O)[O-])[N+](=O)[O-]	1.677	7.84351	26.6155	113.31	188.85	c1cn[nH]c1	Pyr
Cc1nn(CO[N+](=O)[O-])c([N+](=O)[O-])c1N(C)[N+](=O)[O-]	1.63781	7.84338	25.441	108.034	193.343	c1cn[nH]c1	Pyr
CN(c1nc(CCO[N+](=O)[O-])c(N(CCO[N+](=O)[O-])[N+](=O)[O-])n1CO[N+](=O)[O-])[N+](=O)[O-]	1.67486	7.84303	26.6812	108.269	189.641	c1c[nH]cn1	Imi
CN(c1c(N(CCO[N+](=O)[O-])[N+](=O)[O-])c(CO[N+](=O)[O-])nn1CCO[N+](=O)[O-])[N+](=O)[O-]	1.66738	7.8425	26.7302	117.101	201.419	c1cn[nH]c1	Pyr
O=[N+]([O-])OCCN(c1c(CO[N+](=O)[O-])nc(CO[N+](=O)[O-])n1CCO[N+](=O)[O-])[N+](=O)[O-]	1.69853	7.84244	26.4478	111.304	190.567	c1c[nH]cn1	Imi
O=[N+]([O-])OCCc1ncc([N+](=O)[O-])n1CO[N+](=O)[O-]	1.66932	7.84193	25.4193	83.9424	195.726	c1c[nH]cn1	Imi
CN(c1nn(CO[N+](=O)[O-])c(N(CCO[N+](=O)[O-])[N+](=O)[O-])c1CCO[N+](=O)[O-])[N+](=O)[O-]	1.66955	7.84142	26.979	127.209	211.752	c1cn[nH]c1	Pyr
CN(c1nnc(CCO[N+](=O)[O-])o1)[N+](=O)[O-]	1.62437	7.84129	24.2308	65.948	177.649	c1nnco1	Oxa-2
O=[N+]([O-])OCCN(c1nncn1CCO[N+](=O)[O-])[N+](=O)[O-]	1.6475	7.84064	25.3702	74.29	173.969	c1nnc[nH]1	Tra-3
CN(c1cnn(CCO[N+](=O)[O-])c1[N+](=O)[O-])[N+](=O)[O-]	1.64137	7.84029	24.8729	104.931	194.809	c1cn[nH]c1	Pyr
CN(c1cn(CO[N+](=O)[O-])nc1CO[N+](=O)[O-])[N+](=O)[O-]	1.64905	7.83962	25.7494	92.9081	177.98	c1cn[nH]c1	Pyr
O=[N+]([O-])OCCn1cc(CO[N+](=O)[O-])c([N+](=O)[O-])n1	1.66755	7.83779	25.0043	89.1986	189.987	c1cn[nH]c1	Pyr
Cc1nc(N(CCO[N+](=O)[O-])[N+](=O)[O-])no1	1.63128	7.83705	25.1396	48.222	159.753	c1ncon1	Oxa-3
O=[N+]([O-])OCCn1c(CO[N+](=O)[O-])cnc1[N+](=O)[O-]	1.6606	7.83608	25.1163	83.7352	195.558	c1c[nH]cn1	Imi
CN(c1nn(C)nc1N(CCO[N+](=O)[O-])[N+](=O)[O-])[N+](=O)[O-]	1.6142	7.8356	25.7127	106.616	185.169	c1cn[nH]n1	Tra-2
O=[N+]([O-])OCCc1nc([N+](=O)[O-])c([N+](=O)[O-])n1CCO[N+](=O)[O-]	1.69061	7.83543	26.3763	95.9677	203.234	c1c[nH]cn1	Imi
O=[N+]([O-])OCCN(c1nc(CO[N+](=O)[O-])c(CO[N+](=O)[O-])n1CCO[N+](=O)[O-])[N+](=O)[O-]	1.70552	7.83498	26.4897	84.8198	162.221	c1c[nH]cn1	Imi
Cn1nnc(CO[N+](=O)[O-])c1N(CCO[N+](=O)[O-])[N+](=O)[O-]	1.63135	7.83436	25.5717	88.6731	168.674	c1c[nH]nn1	Tra-1
CN(c1ncc(CO[N+](=O)[O-])n1CO[N+](=O)[O-])[N+](=O)[O-]	1.64912	7.83414	25.8837	90.3195	180.13	c1c[nH]cn1	Imi
CN(c1nn(CCO[N+](=O)[O-])c(N(CCO[N+](=O)[O-])[N+](=O)[O-])c1N(CCO[N+](=O)[O-])[N+](=O)[O-])[N+](=O)[O-]	1.69874	7.83413	28.2108	143.709	213.286	c1cn[nH]c1	Pyr
O=[N+]([O-])OCCc1c(CO[N+](=O)[O-])nc(N(CCO[N+](=O)[O-])[N+](=O)[O-])n1CO[N+](=O)[O-]	1.70237	7.83377	26.584	95.935	178.424	c1c[nH]cn1	Imi
Cc1c(N(C)[N+](=O)[O-])nn(CO[N+](=O)[O-])c1[N+](=O)[O-]	1.63911	7.83366	25.4568	108.988	193.743	c1cn[nH]c1	Pyr
CN(c1nnn(CO[N+](=O)[O-])c1CCO[N+](=O)[O-])[N+](=O)[O-]	1.63557	7.83353	25.4065	87.0289	166.252	c1c[nH]nn1	Tra-1
CN(c1nc([N+](=O)[O-])c(N(C)[N+](=O)[O-])n1CCO[N+](=O)[O-])[N+](=O)[O-]	1.6557	7.83233	26.2904	136.622	192.115	c1c[nH]cn1	Imi
O=[N+]([O-])OCCN(c1c(CO[N+](=O)[O-])nn(CCO[N+](=O)[O-])c1CO[N+](=O)[O-])[N+](=O)[O-]	1.70464	7.83214	26.5303	85.6801	164.824	c1cn[nH]c1	Pyr
Cc1nn(CO[N+](=O)[O-])nc1CO[N+](=O)[O-]	1.60147	7.83101	23.6446	73.9812	169.951	c1cn[nH]n1	Tra-2
CN(c1nc(CO[N+](=O)[O-])c(N(CCO[N+](=O)[O-])[N+](=O)[O-])n1CCO[N+](=O)[O-])[N+](=O)[O-]	1.67029	7.83	26.7315	113.654	197.372	c1c[nH]cn1	Imi
CN(c1nnnn1C)[N+](=O)[O-]	1.55021	7.82972	22.8867	61.7228	150.54	c1nnn[nH]1	Tet-1
CN(c1nc([N+](=O)[O-])c(CO[N+](=O)[O-])n1CCO[N+](=O)[O-])[N+](=O)[O-]	1.67394	7.82924	26.6849	116.145	186.225	c1c[nH]cn1	Imi
O=[N+]([O-])OCCc1c([N+](=O)[O-])c([N+](=O)[O-])nn1CCO[N+](=O)[O-]	1.68989	7.82808	26.355	95.4454	203.173	c1cn[nH]c1	Pyr
CN(c1c(CCO[N+](=O)[O-])nn(CO[N+](=O)[O-])c1N(CCO[N+](=O)[O-])[N+](=O)[O-])[N+](=O)[O-]	1.6766	7.82663	26.8498	108.739	189.035	c1cn[nH]c1	Pyr
O=[N+]([O-])OCCc1cnc([N+](=O)[O-])n1CO[N+](=O)[O-]	1.67129	7.82492	25.591	80.1234	192.996	c1c[nH]cn1	Imi
Cn1cc([N+](=O)[O-])nc1[N+](=O)[O-]	1.66419	7.82485	25.4657	109.456	237.285	c1c[nH]cn1	Imi
CN(c1nn(CCO[N+](=O)[O-])cc1[N+](=O)[O-])[N+](=O)[O-]	1.63947	7.82477	24.6588	104.455	192.858	c1cn[nH]c1	Pyr
O=[N+]([O-])OCCc1cc([N+](=O)[O-])nn1CO[N+](=O)[O-]	1.65948	7.82387	25.0744	89.7462	202.177	c1cn[nH]c1	Pyr
CN(c1nnc(CO[N+](=O)[O-])n1CCO[N+](=O)[O-])[N+](=O)[O-]	1.63451	7.82268	25.2308	85.5095	166.528	c1nnc[nH]1	Tra-3
O=[N+]([O-])OCCc1nnc([N+](=O)[O-])n1CCO[N+](=O)[O-]	1.65433	7.82257	24.9418	69.2117	178.477	c1nnc[nH]1	Tra-3
CN(c1nc(CO[N+](=O)[O-])n(CCO[N+](=O)[O-])n1)[N+](=O)[O-]	1.63795	7.82233	25.378	79.2951	159.113	c1nc[nH]n1	Tra-4
O=[N+]([O-])OCCn1nc([N+](=O)[O-])cc1CO[N+](=O)[O-]	1.66824	7.82108	25.3572	82.4801	193.85	c1cn[nH]c1	Pyr
CN(c1nnoc1CCO[N+](=O)[O-])[N+](=O)[O-]	1.63201	7.82107	24.6767	55.552	167.922	c1conn1	Oxa-4
CN(c1c([N+](=O)[O-])c(CO[N+](=O)[O-])nn1C)[N+](=O)[O-]	1.6372	7.82013	25.0969	107.979	189.948	c1cn[nH]c1	Pyr
CN(c1c([N+](=O)[O-])cnn1CCO[N+](=O)[O-])[N+](=O)[O-]	1.64717	7.81968	24.9339	98.6369	191.804	c1cn[nH]c1	Pyr
Cn1c(CO[N+](=O)[O-])nc([N+](=O)[O-])c1CO[N+](=O)[O-]	1.655	7.8186	25.3438	93.0431	189.788	c1c[nH]cn1	Imi
CN(c1nn(CO[N+](=O)[O-])c(CCO[N+](=O)[O-])c1N(CCO[N+](=O)[O-])[N+](=O)[O-])[N+](=O)[O-]	1.67559	7.81857	26.7595	107.884	188.736	c1cn[nH]c1	Pyr
O=[N+]([O-])OCCN(c1cnc(N(CCO[N+](=O)[O-])[N+](=O)[O-])n1CCO[N+](=O)[O-])[N+](=O)[O-]	1.6961	7.8166	26.7888	101.282	184.388	c1c[nH]cn1	Imi
Cc1c([N+](=O)[O-])nn(CO[N+](=O)[O-])c1CO[N+](=O)[O-]	1.65293	7.81659	25.7494	96.0781	192.642	c1cn[nH]c1	Pyr
CN(c1c(CO[N+](=O)[O-])nn(CCO[N+](=O)[O-])c1N(CCO[N+](=O)[O-])[N+](=O)[O-])[N+](=O)[O-]	1.67587	7.81643	26.5344	109.002	185.783	c1cn[nH]c1	Pyr
O=[N+]([O-])OCCc1c([N+](=O)[O-])c(N(CCO[N+](=O)[O-])[N+](=O)[O-])nn1CCO[N+](=O)[O-]	1.69193	7.81611	26.2544	95.0992	184.658	c1cn[nH]c1	Pyr
O=[N+]([O-])OCCn1ncc([N+](=O)[O-])c1CO[N+](=O)[O-]	1.6625	7.8158	25.0883	86.1638	199.948	c1cn[nH]c1	Pyr
CN(c1c(N(CCO[N+](=O)[O-])[N+](=O)[O-])nc(CO[N+](=O)[O-])n1CCO[N+](=O)[O-])[N+](=O)[O-]	1.66931	7.81518	26.4257	118.091	199.914	c1c[nH]cn1	Imi
O=[N+]([O-])OCCn1c([N+](=O)[O-])cnc1CO[N+](=O)[O-]	1.66374	7.81506	25.243	86.8168	200.621	c1c[nH]cn1	Imi
CN(c1nc(CCO[N+](=O)[O-])n(CO[N+](=O)[O-])c1N(CCO[N+](=O)[O-])[N+](=O)[O-])[N+](=O)[O-]	1.67764	7.81504	26.5766	102.401	180.639	c1c[nH]cn1	Imi
Cn1nc([N+](=O)[O-])cc1N(CCO[N+](=O)[O-])[N+](=O)[O-]	1.63324	7.8149	24.7762	104.978	197.981	c1cn[nH]c1	Pyr
Cn1nc([N+](=O)[O-])c(CO[N+](=O)[O-])c1CO[N+](=O)[O-]	1.65072	7.81397	25.4004	92.3584	191.954	c1cn[nH]c1	Pyr
Cc1nn(CO[N+](=O)[O-])c(CO[N+](=O)[O-])c1[N+](=O)[O-]	1.65541	7.81322	25.8509	92.3054	190.073	c1cn[nH]c1	Pyr
O=[N+]([O-])OCCc1c([N+](=O)[O-])nnn1CCO[N+](=O)[O-]	1.64987	7.81317	24.7419	74.2561	181.919	c1c[nH]nn1	Tra-1
CN(c1cnc(N(C)[N+](=O)[O-])n1CO[N+](=O)[O-])[N+](=O)[O-]	1.62867	7.81299	25.5126	118.605	190.497	c1c[nH]cn1	Imi
CN(c1nn(C)c(CO[N+](=O)[O-])c1[N+](=O)[O-])[N+](=O)[O-]	1.63108	7.81284	24.9224	108.549	191.316	c1cn[nH]c1	Pyr
CN(c1nn(CCO[N+](=O)[O-])c(N(CCO[N+](=O)[O-])[N+](=O)[O-])c1CO[N+](=O)[O-])[N+](=O)[O-]	1.6753	7.81261	26.7041	108.114	188.072	c1cn[nH]c1	Pyr
Cn1c([N+](=O)[O-])cnc1N(CCO[N+](=O)[O-])[N+](=O)[O-]	1.63054	7.81237	24.7743	108.328	202.219	c1c[nH]cn1	Imi
Cn1c(CO[N+](=O)[O-])nc(CO[N+](=O)[O-])c1[N+](=O)[O-]	1.66038	7.81195	25.6694	92.4652	189.159	c1c[nH]cn1	Imi
CN(c1ncn(CO[N+](=O)[O-])c1CO[N+](=O)[O-])[N+](=O)[O-]	1.64465	7.81142	25.7108	95.2984	186.699	c1c[nH]cn1	Imi
Cc1nc(CO[N+](=O)[O-])n(CO[N+](=O)[O-])c1[N+](=O)[O-]	1.65704	7.81134	26.0231	94.6287	190.261	c1c[nH]cn1	Imi
Cc1c(N(C)[N+](=O)[O-])nc([N+](=O)[O-])n1CO[N+](=O)[O-]	1.6299	7.81029	25.0057	111.274	193.844	c1c[nH]cn1	Imi
CN(c1nn(CCO[N+](=O)[O-])c(N(C)[N+](=O)[O-])c1N(CCO[N+](=O)[O-])[N+](=O)[O-])[N+](=O)[O-]	1.64389	7.81022	26.8209	164.19	240.187	c1cn[nH]c1	Pyr
Cc1c([N+](=O)[O-])c(N(C)[N+](=O)[O-])nn1CO[N+](=O)[O-]	1.63602	7.80927	25.1619	105.078	187.986	c1cn[nH]c1	Pyr
O=[N+]([O-])OCCc1c(CO[N+](=O)[O-])c(N(CCO[N+](=O)[O-])[N+](=O)[O-])nn1CO[N+](=O)[O-]	1.70747	7.80914	26.6669	86.8842	163.037	c1cn[nH]c1	Pyr
O=[N+]([O-])OCCn1cc([N+](=O)[O-])c(CO[N+](=O)[O-])n1	1.671	7.80908	25.2864	82.3408	192.415	c1cn[nH]c1	Pyr
CN(c1cn(CCO[N+](=O)[O-])nc1[N+](=O)[O-])[N+](=O)[O-]	1.64065	7.80875	24.5501	101.117	191.945	c1cn[nH]c1	Pyr
CN(c1c(N(CCO[N+](=O)[O-])[N+](=O)[O-])nc(N(CCO[N+](=O)[O-])[N+](=O)[O-])n1CCO[N+](=O)[O-])[N+](=O)[O-]	1.69576	7.80863	27.9208	162.781	232.226	c1c[nH]cn1	Imi
O=[N+]([O-])OCCc1nc(N(CCO[N+](=O)[O-])[N+](=O)[O-])c([N+](=O)[O-])n1CCO[N+](=O)[O-]	1.68843	7.80803	26.1904	89.8798	180.684	c1c[nH]cn1	Imi
Cc1c(N(C)[N+](=O)[O-])c([N+](=O)[O-])nn1CO[N+](=O)[O-]	1.63416	7.80661	25.0716	107.784	190.285	c1cn[nH]c1	Pyr
Cn1cc(N(CCO[N+](=O)[O-])[N+](=O)[O-])nc1[N+](=O)[O-]	1.63882	7.80659	24.9924	100.75	195.333	c1c[nH]cn1	Imi
COc1nnn(CO[N+](=O)[O-])n1	1.62041	7.80641	24.7624	68.9989	170.348	c1nn[nH]n1	Tet-2
O=[N+]([O-])OCCc1c(N(CCO[N+](=O)[O-])[N+](=O)[O-])nn(CCO[N+](=O)[O-])c1[N+](=O)[O-]	1.69286	7.80595	26.6156	90.6623	183.161	c1cn[nH]c1	Pyr
CN(c1ncn(CCO[N+](=O)[O-])c1[N+](=O)[O-])[N+](=O)[O-]	1.63472	7.80576	24.7449	105.047	196.099	c1c[nH]cn1	Imi
CN(c1c(CO[N+](=O)[O-])nc(N(CCO[N+](=O)[O-])[N+](=O)[O-])n1CCO[N+](=O)[O-])[N+](=O)[O-]	1.67667	7.80567	26.5553	106.37	182.719	c1c[nH]cn1	Imi
Cn1ncc([N+](=O)[O-])c1[N+](=O)[O-]	1.64184	7.8056	25.2415	98.158	233.219	c1cn[nH]c1	Pyr
Cc1nn(CO[N+](=O)[O-])c(N(C)[N+](=O)[O-])c1[N+](=O)[O-]	1.63654	7.80469	25.4036	102.958	189.24	c1cn[nH]c1	Pyr
Cc1nc(CO[N+](=O)[O-])nn1CO[N+](=O)[O-]	1.60063	7.80459	23.5127	74.1905	169.769	c1nc[nH]n1	Tra-4
O=[N+]([O-])OCCc1nc([N+](=O)[O-])cn1CO[N+](=O)[O-]	1.66568	7.80443	25.2856	84.3726	196.382	c1c[nH]cn1	Imi
O=[N+]([O-])OCCc1nn(CO[N+](=O)[O-])c(N(CCO[N+](=O)[O-])[N+](=O)[O-])c1CO[N+](=O)[O-]	1.70667	7.80366	26.7166	98.0859	175.453	c1cn[nH]c1	Pyr
CN(c1c(CCO[N+](=O)[O-])nc(N(CCO[N+](=O)[O-])[N+](=O)[O-])n1CO[N+](=O)[O-])[N+](=O)[O-]	1.67371	7.803	26.8208	116.113	197.655	c1c[nH]cn1	Imi
Cc1c(CO[N+](=O)[O-])nnn1CO[N+](=O)[O-]	1.60389	7.8029	23.5078	78.1394	172.535	c1c[nH]nn1	Tra-1
O=[N+]([O-])OCCN(c1nc(N(CCO[N+](=O)[O-])[N+](=O)[O-])n(CCO[N+](=O)[O-])c1CO[N+](=O)[O-])[N+](=O)[O-]	1.72514	7.80247	28.0725	120.068	190.572	c1c[nH]cn1	Imi
Cc1c(N(CCO[N+](=O)[O-])[N+](=O)[O-])c(N(CCO[N+](=O)[O-])[N+](=O)[O-])nn1CO[N+](=O)[O-]	1.66947	7.80246	26.8602	120.792	202.63	c1cn[nH]c1	Pyr
Cn1c(N(CCO[N+](=O)[O-])[N+](=O)[O-])cnc1[N+](=O)[O-]	1.6294	7.80148	24.8673	105.49	201.258	c1c[nH]cn1	Imi
CN(c1nc(CO[N+](=O)[O-])c([N+](=O)[O-])n1C)[N+](=O)[O-]	1.63719	7.80009	25.0762	109.041	192.012	c1c[nH]cn1	Imi
CN(c1c(N(CCO[N+](=O)[O-])[N+](=O)[O-])nc(N(CCO[N+](=O)[O-])[N+](=O)[O-])n1C)[N+](=O)[O-]	1.64495	7.79942	27.0188	153.34	230.53	c1c[nH]cn1	Imi
Cc1nc(N(C)[N+](=O)[O-])c([N+](=O)[O-])n1CO[N+](=O)[O-]	1.6321	7.79913	25.2708	107.43	194.959	c1c[nH]cn1	Imi
Cn1cnc(N(CCO[N+](=O)[O-])[N+](=O)[O-])c1[N+](=O)[O-]	1.64446	7.79881	25.3244	94.588	190.997	c1c[nH]cn1	Imi
CN(c1nc(N(CCO[N+](=O)[O-])[N+](=O)[O-])n(CCO[N+](=O)[O-])c1CO[N+](=O)[O-])[N+](=O)[O-]	1.67246	7.79783	26.5118	113.752	193.55	c1c[nH]cn1	Imi
Cn1nc(N(CCO[N+](=O)[O-])[N+](=O)[O-])cc1[N+](=O)[O-]	1.64838	7.79727	25.3805	97.9205	194.566	c1cn[nH]c1	Pyr
Cn1cc([N+](=O)[O-])c(N(CCO[N+](=O)[O-])[N+](=O)[O-])n1	1.63949	7.79714	25.2304	96.0158	191.619	c1cn[nH]c1	Pyr
CN(c1nc(N(CCO[N+](=O)[O-])[N+](=O)[O-])c(N(CCO[N+](=O)[O-])[N+](=O)[O-])n1C)[N+](=O)[O-]	1.64485	7.79692	27.1476	152.624	230.699	c1c[nH]cn1	Imi
COc1nnnn1CO[N+](=O)[O-]	1.62026	7.79677	25.0788	57.9811	161.733	c1nnn[nH]1	Tet-1
O=[N+]([O-])OCCc1nn(CCO[N+](=O)[O-])c(N(CCO[N+](=O)[O-])[N+](=O)[O-])c1[N+](=O)[O-]	1.69397	7.79528	26.3974	94.7883	185.792	c1cn[nH]c1	Pyr
CN(c1c(N(CCO[N+](=O)[O-])[N+](=O)[O-])c(CCO[N+](=O)[O-])nn1CO[N+](=O)[O-])[N+](=O)[O-]	1.67612	7.79515	26.5192	113.596	188.436	c1cn[nH]c1	Pyr
Cn1c(N(CCO[N+](=O)[O-])[N+](=O)[O-])nc(N(CCO[N+](=O)[O-])[N+](=O)[O-])c1CO[N+](=O)[O-]	1.67173	7.79505	26.7244	110.596	188.694	c1c[nH]cn1	Imi
O=[N+]([O-])OCCN(c1cn(CCO[N+](=O)[O-])c(N(CCO[N+](=O)[O-])[N+](=O)[O-])n1)[N+](=O)[O-]	1.69154	7.79328	26.6839	108.324	190.892	c1c[nH]cn1	Imi
O=[N+]([O-])OCCc1nc(CO[N+](=O)[O-])n(CO[N+](=O)[O-])c1N(CCO[N+](=O)[O-])[N+](=O)[O-]	1.70511	7.79315	26.6284	95.8566	175.137	c1c[nH]cn1	Imi
O=[N+]([O-])OCCc1c([N+](=O)[O-])nc(N(CCO[N+](=O)[O-])[N+](=O)[O-])n1CCO[N+](=O)[O-]	1.69064	7.79307	26.2614	88.304	177.175	c1c[nH]cn1	Imi
CN(c1nc(N(C)[N+](=O)[O-])n(CCO[N+](=O)[O-])n1)[N+](=O)[O-]	1.61402	7.79235	24.9996	110.799	167.18	c1nc[nH]n1	Tra-4
Cn1nc(CO[N+](=O)[O-])c(N(CCO[N+](=O)[O-])[N+](=O)[O-])c1N(CCO[N+](=O)[O-])[N+](=O)[O-]	1.66936	7.79227	26.7732	119.23	200.665	c1cn[nH]c1	Pyr
O=[N+]([O-])OCCn1cnc([N+](=O)[O-])c1CO[N+](=O)[O-]	1.6584	7.79184	24.9701	85.875	198.462	c1c[nH]cn1	Imi
CN(c1nc(N(CCO[N+](=O)[O-])[N+](=O)[O-])n(CO[N+](=O)[O-])c1CCO[N+](=O)[O-])[N+](=O)[O-]	1.67265	7.79058	26.5076	117.54	196.273	c1c[nH]cn1	Imi
O=[N+]([O-])OCCN(c1nn(CCO[N+](=O)[O-])c(CO[N+](=O)[O-])c1N(CCO[N+](=O)[O-])[N+](=O)[O-])[N+](=O)[O-]	1.72504	7.78932	27.9882	120.881	189.691	c1cn[nH]c1	Pyr
O=[N+]([O-])OCCc1cnn(CO[N+](=O)[O-])c1N(CCO[N+](=O)[O-])[N+](=O)[O-]	1.66602	7.78845	25.331	79.4101	171.663	c1cn[nH]c1	Pyr
Cn1cnc([N+](=O)[O-])c1[N+](=O)[O-]	1.63907	7.78806	25.1617	97.1023	230.538	c1c[nH]cn1	Imi
Cn1nc(CO[N+](=O)[O-])nc1CO[N+](=O)[O-]	1.6002	7.78788	23.2832	74.1361	169.244	c1nc[nH]n1	Tra-4
O=[N+]([O-])OCCc1cc(N(CCO[N+](=O)[O-])[N+](=O)[O-])n(CO[N+](=O)[O-])n1	1.66014	7.78773	24.9639	88.0608	177.904	c1cn[nH]c1	Pyr
CN(c1cc([N+](=O)[O-])n(CCO[N+](=O)[O-])n1)[N+](=O)[O-]	1.6407	7.78769	24.9482	103.131	197.727	c1cn[nH]c1	Pyr
O=[N+]([O-])OCCc1nc([N+](=O)[O-])c(N(CCO[N+](=O)[O-])[N+](=O)[O-])n1CCO[N+](=O)[O-]	1.68089	7.78696	26.0533	95.7678	190.293	c1c[nH]cn1	Imi
CN(c1nc(N(CCO[N+](=O)[O-])[N+](=O)[O-])c(N(C)[N+](=O)[O-])n1CCO[N+](=O)[O-])[N+](=O)[O-]	1.65014	7.78677	26.5699	147.158	219.985	c1c[nH]cn1	Imi
Cc1nc(N(CCO[N+](=O)[O-])[N+](=O)[O-])n(CO[N+](=O)[O-])c1CO[N+](=O)[O-]	1.64756	7.78675	25.3015	84.982	171.626	c1c[nH]cn1	Imi
O=[N+]([O-])OCCc1nn(CO[N+](=O)[O-])c(CO[N+](=O)[O-])c1N(CCO[N+](=O)[O-])[N+](=O)[O-]	1.70538	7.7867	26.7166	97.5967	177.431	c1cn[nH]c1	Pyr
CN(c1c([N+](=O)[O-])ncn1CCO[N+](=O)[O-])[N+](=O)[O-]	1.63525	7.78648	24.5755	101.196	194.958	c1c[nH]cn1	Imi
O=[N+]([O-])OCCn1ncc(CO[N+](=O)[O-])n1	1.60727	7.7863	22.7781	74.389	166.741	c1cn[nH]n1	Tra-2
CN(c1c(CO[N+](=O)[O-])nn(C)c1[N+](=O)[O-])[N+](=O)[O-]	1.63494	7.78625	25.0929	106.548	188.261	c1cn[nH]c1	Pyr
O=[N+]([O-])OCCc1cnn(CO[N+](=O)[O-])n1	1.61201	7.78613	23.2402	62.1453	167.594	c1cn[nH]n1	Tra-2
Cn1c([N+](=O)[O-])nc(CO[N+](=O)[O-])c1CO[N+](=O)[O-]	1.647	7.7861	25.4202	101.833	194.932	c1c[nH]cn1	Imi
O=[N+]([O-])OCCn1cc([N+](=O)[O-])nc1CO[N+](=O)[O-]	1.66348	7.78539	25.1503	84.7853	196.692	c1c[nH]cn1	Imi
O=[N+]([O-])OCCc1nc([N+](=O)[O-])nn1CCO[N+](=O)[O-]	1.64625	7.7846	24.8763	77.7556	179.651	c1nc[nH]n1	Tra-4
CN(c1nc(N(CCO[N+](=O)[O-])[N+](=O)[O-])c(CCO[N+](=O)[O-])n1CO[N+](=O)[O-])[N+](=O)[O-]	1.67709	7.78421	26.6135	106.446	182.807	c1c[nH]cn1	Imi
Cc1nn(CO[N+](=O)[O-])nc1N(C)[N+](=O)[O-]	1.58139	7.78412	23.5018	84.8044	176.582	c1cn[nH]n1	Tra-2
O=[N+]([O-])OCCc1c([N+](=O)[O-])nn(CCO[N+](=O)[O-])c1N(CCO[N+](=O)[O-])[N+](=O)[O-]	1.68449	7.78364	26.398	97.6631	194.305	c1cn[nH]c1	Pyr
Cc1nc([N+](=O)[O-])c(CO[N+](=O)[O-])n1CO[N+](=O)[O-]	1.64933	7.78357	25.7146	97.4419	190.969	c1c[nH]cn1	Imi
CN(c1c(N(CCO[N+](=O)[O-])[N+](=O)[O-])c([N+](=O)[O-])nn1C)[N+](=O)[O-]	1.64207	7.78286	27.3454	145.962	226.898	c1cn[nH]c1	Pyr
O=[N+]([O-])OCCc1nnnn1CCO[N+](=O)[O-]	1.59931	7.7828	22.463	51.6913	156.525	c1nnn[nH]1	Tet-1
CN(c1ncc([N+](=O)[O-])n1CCO[N+](=O)[O-])[N+](=O)[O-]	1.64139	7.78274	24.9717	101.765	196.298	c1c[nH]cn1	Imi
CN(c1cn(CCO[N+](=O)[O-])c([N+](=O)[O-])n1)[N+](=O)[O-]	1.64405	7.7826	24.8525	99.0962	193.446	c1c[nH]cn1	Imi
CN(c1nc(N(CCO[N+](=O)[O-])[N+](=O)[O-])c(CO[N+](=O)[O-])n1CCO[N+](=O)[O-])[N+](=O)[O-]	1.67519	7.78213	26.4421	107.924	183.367	c1c[nH]cn1	Imi
O=[N+]([O-])OCCc1ncn(CO[N+](=O)[O-])n1	1.61032	7.7817	22.7504	75.1481	168.433	c1nc[nH]n1	Tra-4
O=[N+]([O-])OCCc1c(N(CCO[N+](=O)[O-])[N+](=O)[O-])nn(CO[N+](=O)[O-])c1CO[N+](=O)[O-]	1.70574	7.78123	26.5877	101.405	177.935	c1cn[nH]c1	Pyr
Cn1ncc([N+](=O)[O-])c1N(CCO[N+](=O)[O-])[N+](=O)[O-]	1.63247	7.78098	25.3732	104.428	201.497	c1cn[nH]c1	Pyr
CN(c1nc([N+](=O)[O-])c(CO[N+](=O)[O-])n1C)[N+](=O)[O-]	1.63423	7.78066	24.929	108.922	189.707	c1c[nH]cn1	Imi
Cn1cc(N(CCO[N+](=O)[O-])[N+](=O)[O-])c([N+](=O)[O-])n1	1.62764	7.78062	25.0062	101.281	197.795	c1cn[nH]c1	Pyr
O=[N+]([O-])OCCc1cn(CO[N+](=O)[O-])nc1N(CCO[N+](=O)[O-])[N+](=O)[O-]	1.6574	7.78034	25.0865	89.7821	178.79	c1cn[nH]c1	Pyr
Cc1nc([N+](=O)[O-])c(N(C)[N+](=O)[O-])n1CO[N+](=O)[O-]	1.63186	7.78029	25.0702	107.198	187.633	c1c[nH]cn1	Imi
O=[N+]([O-])OCCc1nnn(CCO[N+](=O)[O-])n1	1.60548	7.78019	22.813	47.0962	154.857	c1nn[nH]n1	Tet-2
Cn1c(CO[N+](=O)[O-])nnc1CO[N+](=O)[O-]	1.59792	7.78006	23.1178	79.6557	172.022	c1nnc[nH]1	Tra-3
COc1nnoc1[N+](=O)[O-]	1.67649	7.7796	27.1877	51.3373	173.236	c1conn1	Oxa-4
Cc1c([N+](=O)[O-])nn(CO[N+](=O)[O-])c1N(C)[N+](=O)[O-]	1.63181	7.77954	25.2509	112.388	188.996	c1cn[nH]c1	Pyr
Cc1c(N(C)[N+](=O)[O-])nnn1CO[N+](=O)[O-]	1.58175	7.77912	23.2047	87.8848	177.597	c1c[nH]nn1	Tra-1
CN(c1nc(CCO[N+](=O)[O-])n(CO[N+](=O)[O-])n1)[N+](=O)[O-]	1.63067	7.77899	25.4261	92.4897	162.808	c1nc[nH]n1	Tra-4
COc1nonc1[N+](=O)[O-]	1.67656	7.77885	27.1789	52.8196	175.287	c1cnon1	Oxa-1
CN(c1c(CO[N+](=O)[O-])c(N(CCO[N+](=O)[O-])[N+](=O)[O-])nn1CCO[N+](=O)[O-])[N+](=O)[O-]	1.67318	7.77874	26.2918	120.061	192.49	c1cn[nH]c1	Pyr
COc1noc([N+](=O)[O-])n1	1.69041	7.77851	26.6735	62.8218	195.691	c1ncon1	Oxa-3
O=[N+]([O-])OCCc1ncn(CO[N+](=O)[O-])c1N(CCO[N+](=O)[O-])[N+](=O)[O-]	1.66064	7.77851	25.1676	83.4578	175.358	c1c[nH]cn1	Imi
COc1nc([N+](=O)[O-])no1	1.68987	7.77784	26.6647	63.0475	195.93	c1ncon1	Oxa-3
O=[N+]([O-])OCCn1cc(CO[N+](=O)[O-])nc1[N+](=O)[O-]	1.65702	7.77741	25.2757	91.2418	201.64	c1c[nH]cn1	Imi
Cc1c([N+](=O)[O-])nc(CO[N+](=O)[O-])n1CO[N+](=O)[O-]	1.64341	7.77661	25.2211	106.967	201.771	c1c[nH]cn1	Imi
CN(c1nn(C)c(N(C)[N+](=O)[O-])c1[N+](=O)[O-])[N+](=O)[O-]	1.62562	7.77658	24.7104	132.432	192.389	c1cn[nH]c1	Pyr
Cn1nc(CO[N+](=O)[O-])c(CO[N+](=O)[O-])c1[N+](=O)[O-]	1.64793	7.77653	25.5688	102.815	197.9	c1cn[nH]c1	Pyr
O=[N+]([O-])OCCN(c1c(CO[N+](=O)[O-])cnn1CCO[N+](=O)[O-])[N+](=O)[O-]	1.66437	7.77612	25.1539	77.5301	169.425	c1cn[nH]c1	Pyr
COc1nnc([N+](=O)[O-])o1	1.69119	7.77578	26.6577	61.1046	195.125	c1nnco1	Oxa-2
COc1onnc1[N+](=O)[O-]	1.67766	7.77577	27.0931	49.8196	175.618	c1conn1	Oxa-4
Cc1c([N+](=O)[O-])c(CO[N+](=O)[O-])nn1CO[N+](=O)[O-]	1.6493	7.77526	25.6162	98.0496	197.11	c1cn[nH]c1	Pyr
Cc1nn(CCO[N+](=O)[O-])c([N+](=O)[O-])c1[N+](=O)[O-]	1.65143	7.77515	24.9021	101.815	211.477	c1cn[nH]c1	Pyr
CN(c1c(N(CCO[N+](=O)[O-])[N+](=O)[O-])cnn1CCO[N+](=O)[O-])[N+](=O)[O-]	1.64131	7.77444	25.0606	99.4872	186.23	c1cn[nH]c1	Pyr
O=[N+]([O-])OCCc1c(N(CCO[N+](=O)[O-])[N+](=O)[O-])nc([N+](=O)[O-])n1CCO[N+](=O)[O-]	1.6853	7.77371	26.161	89.5615	179.677	c1c[nH]cn1	Imi
Cc1nn(CO[N+](=O)[O-])c(N(C)[N+](=O)[O-])c1N(CCO[N+](=O)[O-])[N+](=O)[O-]	1.6235	7.77252	25.4347	110.3	195.63	c1cn[nH]c1	Pyr
CN(c1nnc(N(C)[N+](=O)[O-])n1CCO[N+](=O)[O-])[N+](=O)[O-]	1.60951	7.77235	24.8979	119.317	175.018	c1nnc[nH]1	Tra-3
CN(c1nc(CO[N+](=O)[O-])n(C)c1[N+](=O)[O-])[N+](=O)[O-]	1.63401	7.77219	24.9608	107.864	187.949	c1c[nH]cn1	Imi
O=[N+]([O-])OCCc1c([N+](=O)[O-])ncn1CO[N+](=O)[O-]	1.65793	7.77129	25.1809	90.7218	203.076	c1c[nH]cn1	Imi
CN(c1nc(CO[N+](=O)[O-])n(CCO[N+](=O)[O-])c1N(CCO[N+](=O)[O-])[N+](=O)[O-])[N+](=O)[O-]	1.66887	7.77102	26.5221	135.613	217.511	c1c[nH]cn1	Imi
CN(c1c(CO[N+](=O)[O-])nn(C)c1N(CCO[N+](=O)[O-])[N+](=O)[O-])[N+](=O)[O-]	1.62378	7.77047	25.1157	107.33	191.87	c1cn[nH]c1	Pyr
Cn1c([N+](=O)[O-])nc(CCO[N+](=O)[O-])c1[N+](=O)[O-]	1.64822	7.7699	24.608	102.12	213.214	c1c[nH]cn1	Imi
Cc1c(N(CCO[N+](=O)[O-])[N+](=O)[O-])c(N(C)[N+](=O)[O-])nn1CO[N+](=O)[O-]	1.62513	7.76893	25.3081	107.449	192.958	c1cn[nH]c1	Pyr
COc1c(N(CCO[N+](=O)[O-])[N+](=O)[O-])c([N+](=O)[O-])nn1CO[N+](=O)[O-]	1.67641	7.76889	26.9482	96.9331	174.501	c1cn[nH]c1	Pyr
Cn1cc([N+](=O)[O-])c([N+](=O)[O-])n1	1.6318	7.76869	25.1558	99.5379	231.098	c1cn[nH]c1	Pyr
Cc1nc(N(CCO[N+](=O)[O-])[N+](=O)[O-])c(N(CCO[N+](=O)[O-])[N+](=O)[O-])n1CO[N+](=O)[O-]	1.67077	7.76837	26.788	116.971	190.364	c1c[nH]cn1	Imi
O=[N+]([O-])OCCc1c([N+](=O)[O-])cnn1CO[N+](=O)[O-]	1.66238	7.76793	25.4618	90.7867	204.326	c1cn[nH]c1	Pyr
Cc1nc(CO[N+](=O)[O-])n(CO[N+](=O)[O-])c1N(CCO[N+](=O)[O-])[N+](=O)[O-]	1.64842	7.76697	25.3025	86.7413	172.207	c1c[nH]cn1	Imi
O=[N+]([O-])OCCc1c(N(CCO[N+](=O)[O-])[N+](=O)[O-])cnn1CO[N+](=O)[O-]	1.66615	7.76648	25.0971	79.5871	171.578	c1cn[nH]c1	Pyr
Cc1c(N(CCO[N+](=O)[O-])[N+](=O)[O-])nc(N(CCO[N+](=O)[O-])[N+](=O)[O-])n1CO[N+](=O)[O-]	1.67235	7.76504	26.8035	115.795	188.886	c1c[nH]cn1	Imi
O=[N+]([O-])OCCc1cnc(N(CCO[N+](=O)[O-])[N+](=O)[O-])n1CO[N+](=O)[O-]	1.66342	7.76499	25.003	79.9551	171.411	c1c[nH]cn1	Imi
O=[N+]([O-])OCCc1c(N(CCO[N+](=O)[O-])[N+](=O)[O-])ncn1CO[N+](=O)[O-]	1.66281	7.76413	24.8864	80.2531	171.126	c1c[nH]cn1	Imi
CN(c1c([N+](=O)[O-])nc(CO[N+](=O)[O-])n1C)[N+](=O)[O-]	1.62709	7.76413	24.7633	109.722	192.364	c1c[nH]cn1	Imi
O=[N+]([O-])OCCN(c1ncn(CCO[N+](=O)[O-])c1N(CCO[N+](=O)[O-])[N+](=O)[O-])[N+](=O)[O-]	1.69071	7.76404	26.9127	110.628	194.913	c1c[nH]cn1	Imi
Cc1c(N(C)[N+](=O)[O-])nn(CO[N+](=O)[O-])c1N(CCO[N+](=O)[O-])[N+](=O)[O-]	1.62253	7.76379	25.4085	113.929	198.53	c1cn[nH]c1	Pyr
CN(c1c(N(CCO[N+](=O)[O-])[N+](=O)[O-])nn(CO[N+](=O)[O-])c1CCO[N+](=O)[O-])[N+](=O)[O-]	1.67592	7.76352	26.5789	114.965	185.568	c1cn[nH]c1	Pyr
O=[N+]([O-])OCCc1ncnn1CO[N+](=O)[O-]	1.61243	7.76346	23.1681	60.6394	168.511	c1nc[nH]n1	Tra-4
COc1c(N(CCO[N+](=O)[O-])[N+](=O)[O-])nc([N+](=O)[O-])n1CO[N+](=O)[O-]	1.68266	7.7633	27.2115	91.3672	168.159	c1c[nH]cn1	Imi
O=[N+]([O-])OCCc1nc(N(CCO[N+](=O)[O-])[N+](=O)[O-])c(CO[N+](=O)[O-])n1CO[N+](=O)[O-]	1.70426	7.76327	26.4407	95.5113	168.535	c1c[nH]cn1	Imi
Cc1c([N+](=O)[O-])nn(CCO[N+](=O)[O-])c1[N+](=O)[O-]	1.64112	7.76248	24.5726	99.6117	215.155	c1cn[nH]c1	Pyr
Cn1c(N(CCO[N+](=O)[O-])[N+](=O)[O-])cnc1N(CCO[N+](=O)[O-])[N+](=O)[O-]	1.63594	7.76239	25.2592	105.091	191.1	c1c[nH]cn1	Imi
COc1nn(CO[N+](=O)[O-])c([N+](=O)[O-])c1N(CCO[N+](=O)[O-])[N+](=O)[O-]	1.68069	7.76226	27.3984	95.5233	176.061	c1cn[nH]c1	Pyr
CN(c1cc([N+](=O)[O-])nn1CCO[N+](=O)[O-])[N+](=O)[O-]	1.63421	7.75907	24.6784	106.677	199.793	c1cn[nH]c1	Pyr
Cc1nc([N+](=O)[O-])n(CCO[N+](=O)[O-])c1[N+](=O)[O-]	1.64538	7.75867	24.9184	99.1663	212.242	c1c[nH]cn1	Imi
CN(c1c(N(CCO[N+](=O)[O-])[N+](=O)[O-])c(N(CCO[N+](=O)[O-])[N+](=O)[O-])nn1C)[N+](=O)[O-]	1.64885	7.75832	26.5804	148.298	213.967	c1cn[nH]c1	Pyr
O=[N+]([O-])OCCN(c1nn(CCO[N+](=O)[O-])c(CO[N+](=O)[O-])c1CO[N+](=O)[O-])[N+](=O)[O-]	1.70414	7.75739	26.4294	97.465	170.891	c1cn[nH]c1	Pyr
O=[N+]([O-])OCCN(c1ncn(CCO[N+](=O)[O-])c1CO[N+](=O)[O-])[N+](=O)[O-]	1.65494	7.75709	24.6271	85.6355	174.54	c1c[nH]cn1	Imi
O=[N+]([O-])OCCc1c(CO[N+](=O)[O-])nc(CO[N+](=O)[O-])n1CO[N+](=O)[O-]	1.68009	7.75697	24.8629	81.5421	162.514	c1c[nH]cn1	Imi
O=[N+]([O-])OCCn1ncnc1CO[N+](=O)[O-]	1.61	7.75647	23.0305	60.3299	168.221	c1nc[nH]n1	Tra-4
Cn1c(CCO[N+](=O)[O-])nc([N+](=O)[O-])c1[N+](=O)[O-]	1.63735	7.75642	24.2093	102.88	212.005	c1c[nH]cn1	Imi
COc1c([N+](=O)[O-])c(N(CCO[N+](=O)[O-])[N+](=O)[O-])nn1CO[N+](=O)[O-]	1.67842	7.7564	27.0832	97.5801	176.637	c1cn[nH]c1	Pyr
Cc1c([N+](=O)[O-])c([N+](=O)[O-])nn1CCO[N+](=O)[O-]	1.64343	7.75632	24.3701	104.925	211.761	c1cn[nH]c1	Pyr
Cc1nc(N(CCO[N+](=O)[O-])[N+](=O)[O-])n(CO[N+](=O)[O-])c1N(C)[N+](=O)[O-]	1.62543	7.75606	25.2603	109.218	189.263	c1c[nH]cn1	Imi
Cn1nc(N(CCO[N+](=O)[O-])[N+](=O)[O-])c(CO[N+](=O)[O-])c1N(CCO[N+](=O)[O-])[N+](=O)[O-]	1.66957	7.75597	26.5891	132.738	207.832	c1cn[nH]c1	Pyr
O=[N+]([O-])OCCc1cc(N(CCO[N+](=O)[O-])[N+](=O)[O-])nn1CO[N+](=O)[O-]	1.66339	7.75438	24.9619	83.9202	174.663	c1cn[nH]c1	Pyr
O=[N+]([O-])OCCc1nc(N(CCO[N+](=O)[O-])[N+](=O)[O-])cn1CO[N+](=O)[O-]	1.66489	7.75415	24.8545	79.691	169.604	c1c[nH]cn1	Imi
Cn1nc(CCO[N+](=O)[O-])c([N+](=O)[O-])c1[N+](=O)[O-]	1.63823	7.75403	24.5111	100.972	214.281	c1cn[nH]c1	Pyr
O=[N+]([O-])OCCN(c1c(CO[N+](=O)[O-])c(CO[N+](=O)[O-])nn1CCO[N+](=O)[O-])[N+](=O)[O-]	1.70435	7.75396	26.4943	101.929	175.678	c1cn[nH]c1	Pyr
O=[N+]([O-])OCCc1cn(CO[N+](=O)[O-])nn1	1.6162	7.75396	23.3114	58.6307	167.91	c1c[nH]nn1	Tra-1
O=[N+]([O-])OCCc1nc([N+](=O)[O-])n(CCO[N+](=O)[O-])c1N(CCO[N+](=O)[O-])[N+](=O)[O-]	1.68286	7.75386	26.2767	95.6859	189.34	c1c[nH]cn1	Imi
CN(c1nn(CCO[N+](=O)[O-])c(CO[N+](=O)[O-])c1N(CCO[N+](=O)[O-])[N+](=O)[O-])[N+](=O)[O-]	1.67499	7.75381	26.5142	112.666	184.771	c1cn[nH]c1	Pyr
CN(c1c(N(CCO[N+](=O)[O-])[N+](=O)[O-])ncn1CCO[N+](=O)[O-])[N+](=O)[O-]	1.63791	7.75378	24.8011	101.363	186.031	c1c[nH]cn1	Imi
CN(c1c(CO[N+](=O)[O-])nc([N+](=O)[O-])n1C)[N+](=O)[O-]	1.62859	7.75375	24.9256	114.85	189.204	c1c[nH]cn1	Imi
Cc1nc([N+](=O)[O-])n(CO[N+](=O)[O-])c1N(C)[N+](=O)[O-]	1.62438	7.75344	25.2935	120.461	189.449	c1c[nH]cn1	Imi
Cc1nn(CO[N+](=O)[O-])c(N(CCO[N+](=O)[O-])[N+](=O)[O-])c1CO[N+](=O)[O-]	1.64637	7.75334	25.6725	90.2272	180.917	c1cn[nH]c1	Pyr
O=[N+]([O-])OCCc1nc(N(CCO[N+](=O)[O-])[N+](=O)[O-])n(CO[N+](=O)[O-])c1CO[N+](=O)[O-]	1.70442	7.75287	26.5236	102.303	176.756	c1c[nH]cn1	Imi
Cc1nc(N(C)[N+](=O)[O-])nn1CO[N+](=O)[O-]	1.58133	7.7525	23.3568	78.2516	170.499	c1nc[nH]n1	Tra-4
Cc1nc(N(CCO[N+](=O)[O-])[N+](=O)[O-])c(N(C)[N+](=O)[O-])n1CO[N+](=O)[O-]	1.62924	7.75167	25.1708	102.728	184.069	c1c[nH]cn1	Imi
COc1nc([N+](=O)[O-])n(CO[N+](=O)[O-])c1N(CCO[N+](=O)[O-])[N+](=O)[O-]	1.67873	7.75157	27.2877	92.4573	173.833	c1c[nH]cn1	Imi
CN(c1c([N+](=O)[O-])nn(C)c1CO[N+](=O)[O-])[N+](=O)[O-]	1.62396	7.75096	24.7925	111.085	193.741	c1cn[nH]c1	Pyr
O=[N+]([O-])OCCc1cnnn1CO[N+](=O)[O-]	1.60979	7.75053	23.2563	59.282	170.795	c1c[nH]nn1	Tra-1
O=[N+]([O-])OCCc1nn(CO[N+](=O)[O-])c(CO[N+](=O)[O-])c1CO[N+](=O)[O-]	1.68492	7.75036	25.1247	78.7272	157.404	c1cn[nH]c1	Pyr
O=[N+]([O-])OCc1cnn(CO[N+](=O)[O-])c1	1.62327	7.75008	23.5103	80.0254	176.109	c1cn[nH]c1	Pyr
COc1nn(CO[N+](=O)[O-])nc1N(CCO[N+](=O)[O-])[N+](=O)[O-]	1.64302	7.75007	25.7288	69.5967	158.027	c1cn[nH]n1	Tra-2
Cc1c([N+](=O)[O-])nc([N+](=O)[O-])n1CCO[N+](=O)[O-]	1.64979	7.75001	24.7495	104.094	213.318	c1c[nH]cn1	Imi
O=[N+]([O-])OCCN(c1nc(CO[N+](=O)[O-])n(CCO[N+](=O)[O-])c1CO[N+](=O)[O-])[N+](=O)[O-]	1.70288	7.74966	26.4097	94.6053	166.599	c1c[nH]cn1	Imi
CN(c1nc(N(C)[N+](=O)[O-])n(CCO[N+](=O)[O-])c1N(CCO[N+](=O)[O-])[N+](=O)[O-])[N+](=O)[O-]	1.65483	7.74946	26.7193	141.084	210.663	c1c[nH]cn1	Imi
CN(c1cnc(N(CCO[N+](=O)[O-])[N+](=O)[O-])n1CCO[N+](=O)[O-])[N+](=O)[O-]	1.63862	7.74939	25.0995	102.588	190.105	c1c[nH]cn1	Imi
COc1c(N(CCO[N+](=O)[O-])[N+](=O)[O-])nnn1CO[N+](=O)[O-]	1.63449	7.74938	25.3385	77.9723	162.318	c1c[nH]nn1	Tra-1
Cc1nn(CCO[N+](=O)[O-])c([N+](=O)[O-])c1N(CCO[N+](=O)[O-])[N+](=O)[O-]	1.63194	7.7481	24.7339	96.9041	190.666	c1cn[nH]c1	Pyr
Cc1nc(N(CCO[N+](=O)[O-])[N+](=O)[O-])c(CO[N+](=O)[O-])n1CO[N+](=O)[O-]	1.64373	7.74794	25.1615	91.1799	177.81	c1c[nH]cn1	Imi
Cn1cnc([N+](=O)[O-])c1N(CCO[N+](=O)[O-])[N+](=O)[O-]	1.62626	7.74785	25.1681	102.457	201.138	c1c[nH]cn1	Imi
Cn1ncc(N(CCO[N+](=O)[O-])[N+](=O)[O-])c1[N+](=O)[O-]	1.62872	7.74762	25.0855	105.419	204.822	c1cn[nH]c1	Pyr
Cn1nc(N(CCO[N+](=O)[O-])[N+](=O)[O-])cc1N(CCO[N+](=O)[O-])[N+](=O)[O-]	1.64293	7.74744	25.3048	97.9168	185.008	c1cn[nH]c1	Pyr
Cc1c(N(CCO[N+](=O)[O-])[N+](=O)[O-])nn(CO[N+](=O)[O-])c1CO[N+](=O)[O-]	1.64868	7.74723	25.2789	91.3982	174.109	c1cn[nH]c1	Pyr
Cn1nc([N+](=O)[O-])c(CCO[N+](=O)[O-])c1[N+](=O)[O-]	1.64433	7.74711	24.7046	98.3479	211.775	c1cn[nH]c1	Pyr
COc1nc(N(CCO[N+](=O)[O-])[N+](=O)[O-])n(CO[N+](=O)[O-])c1[N+](=O)[O-]	1.68335	7.74575	27.4971	97.1116	170.686	c1c[nH]cn1	Imi
CN(c1nc(N(CCO[N+](=O)[O-])[N+](=O)[O-])n(CCO[N+](=O)[O-])c1N(C)[N+](=O)[O-])[N+](=O)[O-]	1.64836	7.74559	26.4897	156.577	227.565	c1c[nH]cn1	Imi
CN(c1nn(C)c(N(CCO[N+](=O)[O-])[N+](=O)[O-])c1CO[N+](=O)[O-])[N+](=O)[O-]	1.62167	7.74519	25.2022	111.226	195.894	c1cn[nH]c1	Pyr
O=[N+]([O-])OCCc1nnc(N(CCO[N+](=O)[O-])[N+](=O)[O-])n1CCO[N+](=O)[O-]	1.65491	7.74518	24.4354	69.5919	164.56	c1nnc[nH]1	Tra-3
Cn1cc(N(CCO[N+](=O)[O-])[N+](=O)[O-])nc1N(CCO[N+](=O)[O-])[N+](=O)[O-]	1.62539	7.74479	25.3429	114.616	199.211	c1c[nH]cn1	Imi
CN(c1c(N(CCO[N+](=O)[O-])[N+](=O)[O-])nc(CO[N+](=O)[O-])n1C)[N+](=O)[O-]	1.61913	7.74476	25.048	112.692	196.365	c1c[nH]cn1	Imi
O=[N+]([O-])OCCc1nncn1CO[N+](=O)[O-]	1.61482	7.74465	23.1071	59.8874	168.399	c1nnc[nH]1	Tra-3
CN(c1nnc(CO[N+](=O)[O-])n1C)[N+](=O)[O-]	1.57857	7.74449	22.9714	86.7288	176.671	c1nnc[nH]1	Tra-3
Cc1nc(N(C)[N+](=O)[O-])n(CO[N+](=O)[O-])c1[N+](=O)[O-]	1.62658	7.744	25.2924	115.103	193.395	c1c[nH]cn1	Imi
Cn1c([N+](=O)[O-])nc([N+](=O)[O-])c1CCO[N+](=O)[O-]	1.64583	7.74346	24.5315	102.519	213.361	c1c[nH]cn1	Imi
O=[N+]([O-])OCCc1nn(CO[N+](=O)[O-])cc1N(CCO[N+](=O)[O-])[N+](=O)[O-]	1.66614	7.74305	25.1031	82.055	173.544	c1cn[nH]c1	Pyr
O=[N+]([O-])OCCn1cc(CO[N+](=O)[O-])nn1	1.61803	7.74282	22.9192	70.7782	169.487	c1c[nH]nn1	Tra-1
COc1c(N(CCO[N+](=O)[O-])[N+](=O)[O-])nn(CO[N+](=O)[O-])c1[N+](=O)[O-]	1.67947	7.74272	27.2583	101.668	178.79	c1cn[nH]c1	Pyr
O=[N+]([O-])OCc1cn(CO[N+](=O)[O-])cn1	1.61823	7.7427	23.2642	81.5058	175.577	c1c[nH]cn1	Imi
O=[N+]([O-])OCCc1c(CO[N+](=O)[O-])nn(CCO[N+](=O)[O-])c1[N+](=O)[O-]	1.66953	7.74235	24.6998	83.0879	180.719	c1cn[nH]c1	Pyr
O=[N+]([O-])OCCc1c(N(CCO[N+](=O)[O-])[N+](=O)[O-])c([N+](=O)[O-])nn1CCO[N+](=O)[O-]	1.67575	7.74178	26.2248	112.848	211.281	c1cn[nH]c1	Pyr
O=[N+]([O-])OCCn1cnc(CO[N+](=O)[O-])n1	1.61508	7.74164	22.9756	62.2896	167.637	c1nc[nH]n1	Tra-4
Cn1c(N(CCO[N+](=O)[O-])[N+](=O)[O-])nc(CO[N+](=O)[O-])c1CO[N+](=O)[O-]	1.64434	7.7415	24.9601	89.8892	176.158	c1c[nH]cn1	Imi
O=[N+]([O-])OCCN(c1cnn(CCO[N+](=O)[O-])c1CO[N+](=O)[O-])[N+](=O)[O-]	1.66546	7.74116	24.9584	80.0057	171.365	c1cn[nH]c1	Pyr
O=[N+]([O-])OCCn1nc(CO[N+](=O)[O-])c(CO[N+](=O)[O-])c1CO[N+](=O)[O-]	1.68164	7.74112	24.8899	80.8739	160.748	c1cn[nH]c1	Pyr
COc1nc(N(CCO[N+](=O)[O-])[N+](=O)[O-])c([N+](=O)[O-])n1CO[N+](=O)[O-]	1.67291	7.74077	27.2399	101.153	182.629	c1c[nH]cn1	Imi
O=[N+]([O-])OCCN(c1cnc(CO[N+](=O)[O-])n1CCO[N+](=O)[O-])[N+](=O)[O-]	1.66412	7.7405	25.0058	81.5146	173.372	c1c[nH]cn1	Imi
O=[N+]([O-])OCCc1nc(N(CCO[N+](=O)[O-])[N+](=O)[O-])n(CCO[N+](=O)[O-])c1N(CCO[N+](=O)[O-])[N+](=O)[O-]	1.69112	7.74029	26.7607	108.057	192.869	c1c[nH]cn1	Imi
O=[N+]([O-])OCc1ccn(CO[N+](=O)[O-])n1	1.62657	7.74025	23.5993	80.1265	175.111	c1cn[nH]c1	Pyr
Cc1c(N(C)[N+](=O)[O-])c(N(CCO[N+](=O)[O-])[N+](=O)[O-])nn1CO[N+](=O)[O-]	1.6212	7.73983	25.2362	114.303	197.539	c1cn[nH]c1	Pyr
O=[N+]([O-])OCCc1nc(N(CCO[N+](=O)[O-])[N+](=O)[O-])c(N(CCO[N+](=O)[O-])[N+](=O)[O-])n1CCO[N+](=O)[O-]	1.6919	7.73972	26.4829	101.301	184.118	c1c[nH]cn1	Imi
Cn1c(CO[N+](=O)[O-])nc(N(CCO[N+](=O)[O-])[N+](=O)[O-])c1N(CCO[N+](=O)[O-])[N+](=O)[O-]	1.66902	7.73958	26.5049	120.01	195.384	c1c[nH]cn1	Imi
CN(c1c(CO[N+](=O)[O-])c([N+](=O)[O-])nn1C)[N+](=O)[O-]	1.62255	7.73921	24.8397	115.941	193.749	c1cn[nH]c1	Pyr
CN(c1c(CO[N+](=O)[O-])c(N(CCO[N+](=O)[O-])[N+](=O)[O-])nn1C)[N+](=O)[O-]	1.62576	7.73898	25.0609	107.352	187.333	c1cn[nH]c1	Pyr
O=[N+]([O-])OCCn1c(CO[N+](=O)[O-])nc(CO[N+](=O)[O-])c1CO[N+](=O)[O-]	1.67837	7.73869	24.6992	84.0004	164.652	c1c[nH]cn1	Imi
O=[N+]([O-])OCCN(c1cn(CCO[N+](=O)[O-])nc1N(CCO[N+](=O)[O-])[N+](=O)[O-])[N+](=O)[O-]	1.68939	7.738	26.4997	119.671	198.686	c1cn[nH]c1	Pyr
O=[N+]([O-])OCCc1c(N(CCO[N+](=O)[O-])[N+](=O)[O-])nc(N(CCO[N+](=O)[O-])[N+](=O)[O-])n1CCO[N+](=O)[O-]	1.6913	7.73772	26.2893	115.121	196.386	c1c[nH]cn1	Imi
O=[N+]([O-])OCCc1c([N+](=O)[O-])nn(CO[N+](=O)[O-])c1CCO[N+](=O)[O-]	1.66354	7.73643	24.592	84.0353	185.719	c1cn[nH]c1	Pyr
CN(c1c(CCO[N+](=O)[O-])nn(CO[N+](=O)[O-])c1N(C)[N+](=O)[O-])[N+](=O)[O-]	1.63015	7.7356	24.8645	108.822	185.179	c1cn[nH]c1	Pyr
Cn1nc(CO[N+](=O)[O-])c(CO[N+](=O)[O-])n1	1.59325	7.73557	23.71	70.6532	169.131	c1cn[nH]n1	Tra-2
Cn1nnc(CO[N+](=O)[O-])c1CO[N+](=O)[O-]	1.59571	7.73504	23.7245	68.0606	167.666	c1c[nH]nn1	Tra-1
O=[N+]([O-])OCCc1c(CO[N+](=O)[O-])c(CO[N+](=O)[O-])nn1CO[N+](=O)[O-]	1.6833	7.73493	25.0213	84.7598	162.315	c1cn[nH]c1	Pyr
CN(c1cnc([N+](=O)[O-])n1CCO[N+](=O)[O-])[N+](=O)[O-]	1.62948	7.73487	24.7747	110.969	202.563	c1c[nH]cn1	Imi
COc1nn(CO[N+](=O)[O-])c(N(CCO[N+](=O)[O-])[N+](=O)[O-])c1[N+](=O)[O-]	1.68006	7.73454	27.4107	99.5447	177.166	c1cn[nH]c1	Pyr
Cc1c([N+](=O)[O-])c(N(CCO[N+](=O)[O-])[N+](=O)[O-])nn1CCO[N+](=O)[O-]	1.63261	7.73427	24.5113	100.469	190.298	c1cn[nH]c1	Pyr
O=[N+]([O-])OCCn1nncc1CO[N+](=O)[O-]	1.61334	7.73364	23.2983	56.4244	169.072	c1c[nH]nn1	Tra-1
O=[N+]([O-])OCCN(c1cn(CCO[N+](=O)[O-])nc1CO[N+](=O)[O-])[N+](=O)[O-]	1.65705	7.73326	24.988	88.1636	179.07	c1cn[nH]c1	Pyr
Cc1nc([N+](=O)[O-])c([N+](=O)[O-])n1CCO[N+](=O)[O-]	1.63578	7.73316	24.507	97.2046	213.226	c1c[nH]cn1	Imi
CN(c1nc(CO[N+](=O)[O-])nn1C)[N+](=O)[O-]	1.58136	7.73226	23.2316	78.3894	169.332	c1nc[nH]n1	Tra-4
O=[N+]([O-])OCCc1nc(CO[N+](=O)[O-])n(CCO[N+](=O)[O-])c1[N+](=O)[O-]	1.669	7.73202	24.6489	82.7953	179.441	c1c[nH]cn1	Imi
Cc1c(N(CCO[N+](=O)[O-])[N+](=O)[O-])nn(CO[N+](=O)[O-])c1N(C)[N+](=O)[O-]	1.62612	7.73093	25.2641	113.251	190.207	c1cn[nH]c1	Pyr
CN(c1nn(CCO[N+](=O)[O-])c(N(C)[N+](=O)[O-])c1CO[N+](=O)[O-])[N+](=O)[O-]	1.62584	7.73072	24.8469	111.113	191.387	c1cn[nH]c1	Pyr
CN(c1c(CO[N+](=O)[O-])c(CCO[N+](=O)[O-])nn1CO[N+](=O)[O-])[N+](=O)[O-]	1.65028	7.73011	24.8936	93.0091	175.367	c1cn[nH]c1	Pyr
O=[N+]([O-])OCCc1c(N(CCO[N+](=O)[O-])[N+](=O)[O-])nnn1CCO[N+](=O)[O-]	1.65288	7.73001	24.6201	82.0227	178.775	c1c[nH]nn1	Tra-1
CN(c1nc(N(C)[N+](=O)[O-])n(C)c1[N+](=O)[O-])[N+](=O)[O-]	1.61866	7.72976	24.3258	139.562	191.915	c1c[nH]cn1	Imi
CN(c1nn(CCO[N+](=O)[O-])c(N(CCO[N+](=O)[O-])[N+](=O)[O-])c1N(C)[N+](=O)[O-])[N+](=O)[O-]	1.64886	7.72976	26.4344	159.601	227.218	c1cn[nH]c1	Pyr
CN(c1c(CCO[N+](=O)[O-])c(CO[N+](=O)[O-])nn1CO[N+](=O)[O-])[N+](=O)[O-]	1.64738	7.72972	25.013	101.284	188.782	c1cn[nH]c1	Pyr
CN(c1nc(N(C)[N+](=O)[O-])n(C)n1)[N+](=O)[O-]	1.5725	7.72943	22.839	103.087	174.241	c1nc[nH]n1	Tra-4
Cc1c(CO[N+](=O)[O-])c(N(CCO[N+](=O)[O-])[N+](=O)[O-])nn1CO[N+](=O)[O-]	1.64361	7.72927	25.3482	94.572	184.151	c1cn[nH]c1	Pyr
Cc1nn(CO[N+](=O)[O-])c(CO[N+](=O)[O-])c1N(CCO[N+](=O)[O-])[N+](=O)[O-]	1.64673	7.72923	25.4441	93.8941	180.666	c1cn[nH]c1	Pyr
CN(c1c(N(CCO[N+](=O)[O-])[N+](=O)[O-])nn(C)c1N(C)[N+](=O)[O-])[N+](=O)[O-]	1.6151	7.7291	24.9707	138.16	206.244	c1cn[nH]c1	Pyr
Cn1nc([N+](=O)[O-])c([N+](=O)[O-])c1CCO[N+](=O)[O-]	1.63538	7.72853	24.3655	97.6607	212.693	c1cn[nH]c1	Pyr
CN(c1nc([N+](=O)[O-])n(C)c1CO[N+](=O)[O-])[N+](=O)[O-]	1.62084	7.72803	24.7389	119.356	196.679	c1c[nH]cn1	Imi
Cc1c([N+](=O)[O-])nc(N(C)[N+](=O)[O-])n1CO[N+](=O)[O-]	1.62444	7.72747	24.9728	117.384	190.277	c1c[nH]cn1	Imi
CN(c1c(CO[N+](=O)[O-])nn(CO[N+](=O)[O-])c1CCO[N+](=O)[O-])[N+](=O)[O-]	1.64944	7.72706	24.9368	91.2105	176.516	c1cn[nH]c1	Pyr
CN(c1cn(CCO[N+](=O)[O-])nn1)[N+](=O)[O-]	1.59406	7.72676	22.7029	77.8648	172.95	c1c[nH]nn1	Tra-1
Cc1c(N(C)[N+](=O)[O-])nc(N(CCO[N+](=O)[O-])[N+](=O)[O-])n1CO[N+](=O)[O-]	1.61882	7.72651	25.4807	117.594	203.454	c1c[nH]cn1	Imi
O=[N+]([O-])OCCc1nnn(CCO[N+](=O)[O-])c1N(CCO[N+](=O)[O-])[N+](=O)[O-]	1.6534	7.72631	24.8216	82.4552	181.707	c1c[nH]nn1	Tra-1
Cn1cc([N+](=O)[O-])nc1N(CCO[N+](=O)[O-])[N+](=O)[O-]	1.6301	7.72593	25.0014	106.846	198.013	c1c[nH]cn1	Imi
COc1c([N+](=O)[O-])nc(N(CCO[N+](=O)[O-])[N+](=O)[O-])n1CO[N+](=O)[O-]	1.67882	7.72435	27.1909	99.4344	170.799	c1c[nH]cn1	Imi
CN(c1nc(CO[N+](=O)[O-])n(C)n1)[N+](=O)[O-]	1.58959	7.72413	23.3644	76.2474	168.179	c1nc[nH]n1	Tra-4
Cc1nnn(CO[N+](=O)[O-])c1CO[N+](=O)[O-]	1.59198	7.72385	24.1475	73.8867	168.468	c1c[nH]nn1	Tra-1
O=[N+]([O-])OCCc1nc(CO[N+](=O)[O-])c(CO[N+](=O)[O-])n1CO[N+](=O)[O-]	1.68122	7.72257	24.9732	80.8844	162.856	c1c[nH]cn1	Imi
COc1nnc(N(CCO[N+](=O)[O-])[N+](=O)[O-])n1CO[N+](=O)[O-]	1.63982	7.72235	25.6962	70.2845	157.976	c1nnc[nH]1	Tra-3
O=[N+]([O-])OCCN(c1c(CO[N+](=O)[O-])ncn1CCO[N+](=O)[O-])[N+](=O)[O-]	1.66188	7.72226	24.9603	82.5875	175.174	c1c[nH]cn1	Imi
COc1nc([N+](=O)[O-])c(N(CCO[N+](=O)[O-])[N+](=O)[O-])n1CO[N+](=O)[O-]	1.67683	7.72114	27.1828	97.1664	177.29	c1c[nH]cn1	Imi
COc1nc(N(CCO[N+](=O)[O-])[N+](=O)[O-])n(CO[N+](=O)[O-])n1	1.64068	7.72085	25.9021	69.7849	156.023	c1nc[nH]n1	Tra-4
Cc1nc(CO[N+](=O)[O-])n(CO[N+](=O)[O-])n1	1.59118	7.72	24.0408	73.1018	169.248	c1nc[nH]n1	Tra-4
O=[N+]([O-])OCCc1nc(CO[N+](=O)[O-])n(CO[N+](=O)[O-])c1CO[N+](=O)[O-]	1.68266	7.71892	25.0537	82.2401	161.677	c1c[nH]cn1	Imi
O=[N+]([O-])OCCc1cn(CO[N+](=O)[O-])c(N(CCO[N+](=O)[O-])[N+](=O)[O-])n1	1.66259	7.71851	25.1647	86.3258	179.075	c1c[nH]cn1	Imi
CN(c1c(CCO[N+](=O)[O-])nc(CO[N+](=O)[O-])n1CO[N+](=O)[O-])[N+](=O)[O-]	1.64678	7.71825	24.9318	96.3482	183.528	c1c[nH]cn1	Imi
Cc1c(N(CCO[N+](=O)[O-])[N+](=O)[O-])nc(CO[N+](=O)[O-])n1CO[N+](=O)[O-]	1.64281	7.7178	25.1274	95.6026	183.907	c1c[nH]cn1	Imi
CN(c1nc([N+](=O)[O-])cn1CCO[N+](=O)[O-])[N+](=O)[O-]	1.63376	7.71699	24.6887	108.481	196.143	c1c[nH]cn1	Imi
Cn1nc(N(CCO[N+](=O)[O-])[N+](=O)[O-])c(CO[N+](=O)[O-])c1CO[N+](=O)[O-]	1.6459	7.71694	25.229	88.5283	175.548	c1cn[nH]c1	Pyr
O=[N+]([O-])OCCc1nc(N(CCO[N+](=O)[O-])[N+](=O)[O-])n(CCO[N+](=O)[O-])n1	1.65596	7.71684	24.5401	75.0652	167.052	c1nc[nH]n1	Tra-4
Cn1ncnc1N(CCO[N+](=O)[O-])[N+](=O)[O-]	1.58567	7.71661	23.1963	67.7703	169.041	c1nc[nH]n1	Tra-4
CN(c1nc([N+](=O)[O-])c(N(C)[N+](=O)[O-])n1C)[N+](=O)[O-]	1.61606	7.71661	24.2166	141.492	190.659	c1c[nH]cn1	Imi
CN(c1cnnn1CCO[N+](=O)[O-])[N+](=O)[O-]	1.58431	7.71612	22.7622	75.9861	173.913	c1c[nH]nn1	Tra-1
Cn1nc(CO[N+](=O)[O-])c(CO[N+](=O)[O-])c1N(CCO[N+](=O)[O-])[N+](=O)[O-]	1.64634	7.71582	25.2647	91.5743	178.079	c1cn[nH]c1	Pyr
CN(c1cnn(CCO[N+](=O)[O-])c1N(CCO[N+](=O)[O-])[N+](=O)[O-])[N+](=O)[O-]	1.63693	7.71561	25.1	107.828	194.673	c1cn[nH]c1	Pyr
CN(c1ncn(CCO[N+](=O)[O-])n1)[N+](=O)[O-]	1.59092	7.71544	22.6873	74.0016	171.521	c1nc[nH]n1	Tra-4
Cc1nc(N(CCO[N+](=O)[O-])[N+](=O)[O-])c([N+](=O)[O-])n1CCO[N+](=O)[O-]	1.63554	7.71542	24.6141	94.1389	187.126	c1c[nH]cn1	Imi
O=[N+]([O-])OCCc1c(CO[N+](=O)[O-])nn(CO[N+](=O)[O-])c1CO[N+](=O)[O-]	1.68313	7.71542	25.098	88.1517	164.862	c1cn[nH]c1	Pyr
O=[N+]([O-])OCCc1nc(N(CCO[N+](=O)[O-])[N+](=O)[O-])nn1CCO[N+](=O)[O-]	1.65334	7.71482	24.5481	77.234	172.642	c1nc[nH]n1	Tra-4
CN(c1cnn(CCO[N+](=O)[O-])n1)[N+](=O)[O-]	1.59055	7.71461	22.9873	69.8924	169.622	c1cn[nH]n1	Tra-2
Cc1nc(N(C)[N+](=O)[O-])c(N(CCO[N+](=O)[O-])[N+](=O)[O-])n1CO[N+](=O)[O-]	1.62392	7.71405	25.2099	110.104	190.139	c1c[nH]cn1	Imi
Cc1nnc(CO[N+](=O)[O-])n1CO[N+](=O)[O-]	1.58998	7.71385	23.7604	74.4993	171.27	c1nnc[nH]1	Tra-3
CN(c1ncnn1CCO[N+](=O)[O-])[N+](=O)[O-]	1.58772	7.7136	22.8147	71.309	171.1	c1nc[nH]n1	Tra-4
COc1nnn(CO[N+](=O)[O-])c1N(CCO[N+](=O)[O-])[N+](=O)[O-]	1.63997	7.71237	25.8896	72.7153	161.651	c1c[nH]nn1	Tra-1
CN(c1c(CO[N+](=O)[O-])c(CO[N+](=O)[O-])nn1CCO[N+](=O)[O-])[N+](=O)[O-]	1.65153	7.71195	24.9398	87.6823	171.041	c1cn[nH]c1	Pyr
CN(c1nn(CCO[N+](=O)[O-])c(CO[N+](=O)[O-])c1CO[N+](=O)[O-])[N+](=O)[O-]	1.64899	7.71186	24.8692	90.8379	174.765	c1cn[nH]c1	Pyr
CN(c1c(CCO[N+](=O)[O-])nn(CO[N+](=O)[O-])c1CO[N+](=O)[O-])[N+](=O)[O-]	1.64868	7.71137	25.1271	93.7243	181.572	c1cn[nH]c1	Pyr
Cc1nc(N(C)[N+](=O)[O-])n(CO[N+](=O)[O-])c1N(CCO[N+](=O)[O-])[N+](=O)[O-]	1.62101	7.71038	25.4678	118.574	203.354	c1c[nH]cn1	Imi
O=[N+]([O-])OCCN(c1ncc(CO[N+](=O)[O-])n1CCO[N+](=O)[O-])[N+](=O)[O-]	1.66252	7.71033	25.0738	86.1203	178.644	c1c[nH]cn1	Imi
O=[N+]([O-])OCCn1cnnc1CO[N+](=O)[O-]	1.61188	7.71022	23.202	56.0735	169.246	c1nnc[nH]1	Tra-3
CN(c1c(N(CCO[N+](=O)[O-])[N+](=O)[O-])nc(CCO[N+](=O)[O-])n1CO[N+](=O)[O-])[N+](=O)[O-]	1.67376	7.71022	26.4194	117.716	185.289	c1c[nH]cn1	Imi
O=[N+]([O-])OCCc1c([N+](=O)[O-])c(CO[N+](=O)[O-])nn1CCO[N+](=O)[O-]	1.66871	7.70913	24.5085	86.4661	184.832	c1cn[nH]c1	Pyr
CN(c1c(N(CCO[N+](=O)[O-])[N+](=O)[O-])nn(C)c1CO[N+](=O)[O-])[N+](=O)[O-]	1.61851	7.70764	25.0289	118.363	200.653	c1cn[nH]c1	Pyr
COc1c([N+](=O)[O-])nn(CO[N+](=O)[O-])c1N(CCO[N+](=O)[O-])[N+](=O)[O-]	1.67517	7.70755	27.2769	101.781	181.484	c1cn[nH]c1	Pyr
O=[N+]([O-])OCCN(c1cn(CCO[N+](=O)[O-])c(CO[N+](=O)[O-])n1)[N+](=O)[O-]	1.66435	7.70739	24.8201	79.3877	170.271	c1c[nH]cn1	Imi
CN(c1c(CO[N+](=O)[O-])nc(CCO[N+](=O)[O-])n1CO[N+](=O)[O-])[N+](=O)[O-]	1.64758	7.70704	25.0019	91.9087	179.91	c1c[nH]cn1	Imi
CN(c1c(CCO[N+](=O)[O-])nc([N+](=O)[O-])n1CCO[N+](=O)[O-])[N+](=O)[O-]	1.63075	7.70605	24.1499	97.0939	191.77	c1c[nH]cn1	Imi
CN(c1nc([N+](=O)[O-])n(C)c1N(C)[N+](=O)[O-])[N+](=O)[O-]	1.6166	7.70602	24.386	141.908	196.214	c1c[nH]cn1	Imi
Cn1nncc1N(CCO[N+](=O)[O-])[N+](=O)[O-]	1.57804	7.70573	23.1134	77.6064	177.375	c1c[nH]nn1	Tra-1
COc1c(CO[N+](=O)[O-])nn(CO[N+](=O)[O-])c1[N+](=O)[O-]	1.67433	7.70512	26.0655	89.9683	178.627	c1cn[nH]c1	Pyr
CN(c1nnc(N(C)[N+](=O)[O-])n1C)[N+](=O)[O-]	1.57128	7.70506	22.729	104.259	173.728	c1nnc[nH]1	Tra-3
Cc1c(N(CCO[N+](=O)[O-])[N+](=O)[O-])nc([N+](=O)[O-])n1CCO[N+](=O)[O-]	1.62411	7.70484	24.3532	99.5283	194.841	c1c[nH]cn1	Imi
O=[N+]([O-])OCc1nccn1CO[N+](=O)[O-]	1.62094	7.70483	23.7987	65.2135	180.505	c1c[nH]cn1	Imi
O=[N+]([O-])OCCc1nc([N+](=O)[O-])n(CO[N+](=O)[O-])c1CCO[N+](=O)[O-]	1.66084	7.70412	24.5217	82.8065	187.258	c1c[nH]cn1	Imi
CN(c1c(N(CCO[N+](=O)[O-])[N+](=O)[O-])nn(CCO[N+](=O)[O-])c1N(C)[N+](=O)[O-])[N+](=O)[O-]	1.65171	7.70344	26.3449	151.953	211.105	c1cn[nH]c1	Pyr
Cc1nc(CO[N+](=O)[O-])c(N(CCO[N+](=O)[O-])[N+](=O)[O-])n1CO[N+](=O)[O-]	1.64416	7.70339	25.1696	96.9005	180.985	c1c[nH]cn1	Imi
COc1nc(N(CCO[N+](=O)[O-])[N+](=O)[O-])nn1CO[N+](=O)[O-]	1.63469	7.70308	25.5903	86.6866	167.351	c1nc[nH]n1	Tra-4
CN(c1nc(CCO[N+](=O)[O-])c(CO[N+](=O)[O-])n1CO[N+](=O)[O-])[N+](=O)[O-]	1.65163	7.703	25.0874	87.5941	172.519	c1c[nH]cn1	Imi
O=[N+]([O-])OCCc1nc([N+](=O)[O-])n(CCO[N+](=O)[O-])c1CO[N+](=O)[O-]	1.66267	7.70293	24.5293	80.8656	182.527	c1c[nH]cn1	Imi
O=[N+]([O-])OCCc1nn(CCO[N+](=O)[O-])c(N(CCO[N+](=O)[O-])[N+](=O)[O-])c1N(CCO[N+](=O)[O-])[N+](=O)[O-]	1.69302	7.7027	26.7279	126.54	209.801	c1cn[nH]c1	Pyr
CN(c1nn(C)c([N+](=O)[O-])c1CO[N+](=O)[O-])[N+](=O)[O-]	1.62026	7.70262	24.9649	123.934	190.864	c1cn[nH]c1	Pyr
O=[N+]([O-])OCCN(c1cc(CO[N+](=O)[O-])nn1CCO[N+](=O)[O-])[N+](=O)[O-]	1.66212	7.70232	24.9333	91.6804	182.81	c1cn[nH]c1	Pyr
CN(c1nn(CCO[N+](=O)[O-])c([N+](=O)[O-])c1CCO[N+](=O)[O-])[N+](=O)[O-]	1.6352	7.70213	24.3005	101.981	194.422	c1cn[nH]c1	Pyr
CN(c1nn(C)c([N+](=O)[O-])c1N(C)[N+](=O)[O-])[N+](=O)[O-]	1.61337	7.70213	24.33	141.974	193.475	c1cn[nH]c1	Pyr
Cn1nc(CCO[N+](=O)[O-])c([N+](=O)[O-])c1N(CCO[N+](=O)[O-])[N+](=O)[O-]	1.63255	7.70175	24.5102	101.855	195.615	c1cn[nH]c1	Pyr
CN(c1nc(CO[N+](=O)[O-])n(CCO[N+](=O)[O-])c1N(C)[N+](=O)[O-])[N+](=O)[O-]	1.62416	7.70012	24.5581	114.887	189.394	c1c[nH]cn1	Imi
Cc1nc(N(C)[N+](=O)[O-])n(CO[N+](=O)[O-])n1	1.57153	7.7	23.5591	80.5799	163.453	c1nc[nH]n1	Tra-4
CN(c1nc(CO[N+](=O)[O-])c(CCO[N+](=O)[O-])n1CO[N+](=O)[O-])[N+](=O)[O-]	1.64651	7.6998	24.874	97.9852	184.499	c1c[nH]cn1	Imi
Cc1c(N(CCO[N+](=O)[O-])[N+](=O)[O-])nc(N(C)[N+](=O)[O-])n1CO[N+](=O)[O-]	1.62635	7.69945	25.1261	109.974	187.604	c1c[nH]cn1	Imi
O=[N+]([O-])OCCc1nn(CO[N+](=O)[O-])c(CCO[N+](=O)[O-])c1[N+](=O)[O-]	1.67235	7.69903	24.7926	86.0958	184.677	c1cn[nH]c1	Pyr
CN(c1nn(CO[N+](=O)[O-])c(CCO[N+](=O)[O-])c1CO[N+](=O)[O-])[N+](=O)[O-]	1.64539	7.69895	25.0995	100.332	190.139	c1cn[nH]c1	Pyr
CN(c1cnn(CO[N+](=O)[O-])c1)[N+](=O)[O-]	1.61141	7.6987	23.4295	85.567	184.248	c1cn[nH]c1	Pyr
Cn1cnnc1N(CCO[N+](=O)[O-])[N+](=O)[O-]	1.58672	7.69867	23.211	67.8099	170.466	c1nnc[nH]1	Tra-3
Cn1c(CO[N+](=O)[O-])nc(CO[N+](=O)[O-])c1N(CCO[N+](=O)[O-])[N+](=O)[O-]	1.64313	7.69858	24.8986	96.832	182.575	c1c[nH]cn1	Imi
Cc1nnc(N(C)[N+](=O)[O-])n1CO[N+](=O)[O-]	1.57413	7.69797	23.3761	78.6661	167.957	c1nnc[nH]1	Tra-3
O=[N+]([O-])OCCc1nn(CCO[N+](=O)[O-])c(CO[N+](=O)[O-])c1[N+](=O)[O-]	1.67051	7.69792	24.5348	85.7317	183.139	c1cn[nH]c1	Pyr
CN(c1c(CO[N+](=O)[O-])nc(N(CCO[N+](=O)[O-])[N+](=O)[O-])n1C)[N+](=O)[O-]	1.62704	7.6971	25.0141	109.691	185.013	c1c[nH]cn1	Imi
CN(c1ncc(N(CCO[N+](=O)[O-])[N+](=O)[O-])n1CCO[N+](=O)[O-])[N+](=O)[O-]	1.64105	7.69694	25.1769	103.24	190.731	c1c[nH]cn1	Imi
CN(c1nc(CCO[N+](=O)[O-])c([N+](=O)[O-])n1CCO[N+](=O)[O-])[N+](=O)[O-]	1.6359	7.69691	24.376	98.6473	192.153	c1c[nH]cn1	Imi
O=[N+]([O-])OCCc1nn(CCO[N+](=O)[O-])c([N+](=O)[O-])c1CO[N+](=O)[O-]	1.66956	7.69659	24.6846	84.9047	183.899	c1cn[nH]c1	Pyr
Cn1nc(N(CCO[N+](=O)[O-])[N+](=O)[O-])c(CCO[N+](=O)[O-])c1[N+](=O)[O-]	1.63589	7.69629	24.6384	98.1934	192.169	c1cn[nH]c1	Pyr
CN(c1nc(CO[N+](=O)[O-])n(CO[N+](=O)[O-])c1CCO[N+](=O)[O-])[N+](=O)[O-]	1.64934	7.69598	24.9114	91.8297	173.541	c1c[nH]cn1	Imi
CN(c1nc(N(CCO[N+](=O)[O-])[N+](=O)[O-])n(C)c1N(C)[N+](=O)[O-])[N+](=O)[O-]	1.60984	7.69574	24.7201	146.735	209.588	c1c[nH]cn1	Imi
CN(c1c([N+](=O)[O-])nn(C)c1N(C)[N+](=O)[O-])[N+](=O)[O-]	1.61179	7.69567	24.2502	142.86	192.153	c1cn[nH]c1	Pyr
CN(c1nn(CO[N+](=O)[O-])c(CO[N+](=O)[O-])c1CCO[N+](=O)[O-])[N+](=O)[O-]	1.64789	7.69564	25.0447	99.0694	185.329	c1cn[nH]c1	Pyr
Cn1ncc(N(CCO[N+](=O)[O-])[N+](=O)[O-])n1	1.58374	7.69509	23.3106	67.9759	169.642	c1cn[nH]n1	Tra-2
O=[N+]([O-])OCCc1c(N(CCO[N+](=O)[O-])[N+](=O)[O-])c(N(CCO[N+](=O)[O-])[N+](=O)[O-])nn1CCO[N+](=O)[O-]	1.69402	7.69476	26.4113	104.156	185.409	c1cn[nH]c1	Pyr
CN(c1ncn(CCO[N+](=O)[O-])c1N(CCO[N+](=O)[O-])[N+](=O)[O-])[N+](=O)[O-]	1.63266	7.69465	25.0753	111.913	199.254	c1c[nH]cn1	Imi
Cc1nc(N(CCO[N+](=O)[O-])[N+](=O)[O-])n(CCO[N+](=O)[O-])c1[N+](=O)[O-]	1.64066	7.69288	24.8864	94.2974	187.42	c1c[nH]cn1	Imi
Cc1c(CO[N+](=O)[O-])nc(N(CCO[N+](=O)[O-])[N+](=O)[O-])n1CO[N+](=O)[O-]	1.64299	7.69269	25.078	100.996	186.154	c1c[nH]cn1	Imi
O=[N+]([O-])OCCN(c1cc(CO[N+](=O)[O-])n(CCO[N+](=O)[O-])n1)[N+](=O)[O-]	1.66529	7.69248	24.9344	83.7005	173.736	c1cn[nH]c1	Pyr
CN(c1nncn1CCO[N+](=O)[O-])[N+](=O)[O-]	1.58346	7.69232	22.6676	73.0666	171.803	c1nnc[nH]1	Tra-3
Cn1cc(N(CCO[N+](=O)[O-])[N+](=O)[O-])c(N(CCO[N+](=O)[O-])[N+](=O)[O-])n1	1.62546	7.69231	25.3862	122.426	208.654	c1cn[nH]c1	Pyr
CN(c1c([N+](=O)[O-])c(CCO[N+](=O)[O-])nn1CCO[N+](=O)[O-])[N+](=O)[O-]	1.64063	7.69116	24.3499	97.3332	187.614	c1cn[nH]c1	Pyr
CN(c1ccn(CO[N+](=O)[O-])n1)[N+](=O)[O-]	1.60346	7.69106	23.4015	84.378	181.939	c1cn[nH]c1	Pyr
CN(c1nn(C)c(N(CCO[N+](=O)[O-])[N+](=O)[O-])c1N(C)[N+](=O)[O-])[N+](=O)[O-]	1.60953	7.68929	24.808	146.888	209.853	c1cn[nH]c1	Pyr
Cc1nnn(CCO[N+](=O)[O-])c1[N+](=O)[O-]	1.58923	7.68861	22.5137	83.2699	197.67	c1c[nH]nn1	Tra-1
CN(c1ccnn1CO[N+](=O)[O-])[N+](=O)[O-]	1.60074	7.68861	23.5122	78.6171	182.365	c1cn[nH]c1	Pyr
Cn1c(N(CCO[N+](=O)[O-])[N+](=O)[O-])nc([N+](=O)[O-])c1CCO[N+](=O)[O-]	1.63906	7.68657	24.5143	94.6759	186.463	c1c[nH]cn1	Imi
Cc1nn(CCO[N+](=O)[O-])nc1[N+](=O)[O-]	1.5947	7.68649	22.4431	85.9254	198.713	c1cn[nH]n1	Tra-2
COc1c([N+](=O)[O-])c(CO[N+](=O)[O-])nn1CO[N+](=O)[O-]	1.67639	7.68636	26.0383	90.2473	178.313	c1cn[nH]c1	Pyr
O=[N+]([O-])OCCc1c([N+](=O)[O-])nn(CCO[N+](=O)[O-])c1CO[N+](=O)[O-]	1.65287	7.68622	24.4357	94.2833	195.999	c1cn[nH]c1	Pyr
COc1nn(CO[N+](=O)[O-])c([N+](=O)[O-])c1CO[N+](=O)[O-]	1.67099	7.68596	26.1764	90.325	180.998	c1cn[nH]c1	Pyr
Cc1nnn(CO[N+](=O)[O-])c1N(C)[N+](=O)[O-]	1.56724	7.68562	23.4074	89.7921	179.173	c1c[nH]nn1	Tra-1
CN(c1nn(CO[N+](=O)[O-])c(N(C)[N+](=O)[O-])c1CCO[N+](=O)[O-])[N+](=O)[O-]	1.62716	7.68551	24.9094	116.675	188.293	c1cn[nH]c1	Pyr
Cc1c(N(CCO[N+](=O)[O-])[N+](=O)[O-])c(CO[N+](=O)[O-])nn1CO[N+](=O)[O-]	1.64338	7.68517	24.971	105.094	184.055	c1cn[nH]c1	Pyr
CN(c1c(CO[N+](=O)[O-])nc(CO[N+](=O)[O-])n1CCO[N+](=O)[O-])[N+](=O)[O-]	1.64559	7.68482	24.5496	101.971	179.714	c1c[nH]cn1	Imi
COc1c(CO[N+](=O)[O-])nc([N+](=O)[O-])n1CO[N+](=O)[O-]	1.67146	7.68468	26.1184	85.2899	174.776	c1c[nH]cn1	Imi
Cc1c(N(CCO[N+](=O)[O-])[N+](=O)[O-])c([N+](=O)[O-])nn1CCO[N+](=O)[O-]	1.62911	7.68465	24.3066	97.7622	190.535	c1cn[nH]c1	Pyr
CN(c1nc(CO[N+](=O)[O-])c(N(C)[N+](=O)[O-])n1CCO[N+](=O)[O-])[N+](=O)[O-]	1.62352	7.68461	24.6208	116.782	192.131	c1c[nH]cn1	Imi
CN(c1nc(N(CCO[N+](=O)[O-])[N+](=O)[O-])n(C)c1CO[N+](=O)[O-])[N+](=O)[O-]	1.62234	7.68457	24.9741	114.922	192.598	c1c[nH]cn1	Imi
CN(c1c([N+](=O)[O-])nn(CCO[N+](=O)[O-])c1CCO[N+](=O)[O-])[N+](=O)[O-]	1.63408	7.68433	24.1319	96.1602	187.899	c1cn[nH]c1	Pyr
O=[N+]([O-])OCCc1ncc(N(CCO[N+](=O)[O-])[N+](=O)[O-])n1CO[N+](=O)[O-]	1.66391	7.684	25.0906	88.2666	179.175	c1c[nH]cn1	Imi
O=[N+]([O-])OCc1ccnn1CO[N+](=O)[O-]	1.61632	7.68381	24.058	66.6267	189.284	c1cn[nH]c1	Pyr
Cn1nc(N(CCO[N+](=O)[O-])[N+](=O)[O-])c([N+](=O)[O-])c1CCO[N+](=O)[O-]	1.63382	7.68326	24.5416	99.0049	191.265	c1cn[nH]c1	Pyr
CN(c1c(CCO[N+](=O)[O-])nn(CCO[N+](=O)[O-])c1[N+](=O)[O-])[N+](=O)[O-]	1.63475	7.68312	24.2045	102.414	193.022	c1cn[nH]c1	Pyr
CN(c1nn(C)nc1CO[N+](=O)[O-])[N+](=O)[O-]	1.5712	7.68292	23.305	81.5079	164.368	c1cn[nH]n1	Tra-2
CN(c1nn(CCO[N+](=O)[O-])cc1N(CCO[N+](=O)[O-])[N+](=O)[O-])[N+](=O)[O-]	1.63701	7.68291	24.8075	108.898	190.747	c1cn[nH]c1	Pyr
Cn1nnc(CCO[N+](=O)[O-])c1[N+](=O)[O-]	1.58835	7.68188	22.3462	84.0268	197.461	c1c[nH]nn1	Tra-1
O=[N+]([O-])OCCc1nc(CCO[N+](=O)[O-])n(CO[N+](=O)[O-])c1[N+](=O)[O-]	1.66768	7.68159	24.6489	89.1633	188.741	c1c[nH]cn1	Imi
COc1nc(CO[N+](=O)[O-])c([N+](=O)[O-])n1CO[N+](=O)[O-]	1.67293	7.68121	26.1211	84.7416	176.097	c1c[nH]cn1	Imi
CN(c1nn(C)c(CO[N+](=O)[O-])c1N(CCO[N+](=O)[O-])[N+](=O)[O-])[N+](=O)[O-]	1.62407	7.6798	25.1474	111.009	188.78	c1cn[nH]c1	Pyr
O=[N+]([O-])OCCc1nn(CO[N+](=O)[O-])c([N+](=O)[O-])c1CCO[N+](=O)[O-]	1.67091	7.6794	24.9536	89.1673	186.879	c1cn[nH]c1	Pyr
Cc1nnn(CCO[N+](=O)[O-])c1N(CCO[N+](=O)[O-])[N+](=O)[O-]	1.59351	7.67926	22.9462	71.6712	171.343	c1c[nH]nn1	Tra-1
Cn1nc(CO[N+](=O)[O-])c(N(CCO[N+](=O)[O-])[N+](=O)[O-])c1CO[N+](=O)[O-]	1.64387	7.67898	25.2162	95.015	181.601	c1cn[nH]c1	Pyr
Cn1cnc(N(CCO[N+](=O)[O-])[N+](=O)[O-])n1	1.57732	7.6788	23.1677	70.0913	171.342	c1nc[nH]n1	Tra-4
CN(c1nn(C)c(N(C)[N+](=O)[O-])c1N(CCO[N+](=O)[O-])[N+](=O)[O-])[N+](=O)[O-]	1.60981	7.6779	24.9923	146.467	210.361	c1cn[nH]c1	Pyr
Cc1nc([N+](=O)[O-])n(CCO[N+](=O)[O-])n1	1.5895	7.67718	22.6101	78.6701	195.585	c1nc[nH]n1	Tra-4
CN(c1nc(N(CCO[N+](=O)[O-])[N+](=O)[O-])cn1CCO[N+](=O)[O-])[N+](=O)[O-]	1.63602	7.6771	24.7063	110.965	191.17	c1c[nH]cn1	Imi
CN(c1c(N(CCO[N+](=O)[O-])[N+](=O)[O-])c(CO[N+](=O)[O-])nn1C)[N+](=O)[O-]	1.62433	7.6762	25.1563	112.377	187.982	c1cn[nH]c1	Pyr
Cc1nn(CO[N+](=O)[O-])c(N(CCO[N+](=O)[O-])[N+](=O)[O-])c1N(C)[N+](=O)[O-]	1.6189	7.67549	25.3341	128.933	209.608	c1cn[nH]c1	Pyr
COc1nc(N(CCO[N+](=O)[O-])[N+](=O)[O-])no1	1.63743	7.67541	25.2164	48.5099	163.665	c1ncon1	Oxa-3
CN(c1nc(CCO[N+](=O)[O-])c(N(C)[N+](=O)[O-])n1CO[N+](=O)[O-])[N+](=O)[O-]	1.62542	7.67532	24.8308	118.297	189.319	c1c[nH]cn1	Imi
O=[N+]([O-])OCCc1c(N(CCO[N+](=O)[O-])[N+](=O)[O-])nn(CCO[N+](=O)[O-])c1N(CCO[N+](=O)[O-])[N+](=O)[O-]	1.69556	7.6746	26.349	126.194	206.768	c1cn[nH]c1	Pyr
CN(c1nc(CO[N+](=O)[O-])n(C)c1N(CCO[N+](=O)[O-])[N+](=O)[O-])[N+](=O)[O-]	1.62475	7.67424	24.9257	110.556	187.427	c1c[nH]cn1	Imi
CN(c1nnn(C)c1CO[N+](=O)[O-])[N+](=O)[O-]	1.57103	7.67397	23.2616	82.1695	164.619	c1c[nH]nn1	Tra-1
CN(c1c(CO[N+](=O)[O-])nnn1C)[N+](=O)[O-]	1.56865	7.67371	23.1512	86.8479	177.607	c1c[nH]nn1	Tra-1
CN(c1cn(CO[N+](=O)[O-])cn1)[N+](=O)[O-]	1.60796	7.67327	23.2269	88.3569	185.939	c1c[nH]cn1	Imi
Cc1c(CO[N+](=O)[O-])nn(CO[N+](=O)[O-])c1N(CCO[N+](=O)[O-])[N+](=O)[O-]	1.64418	7.67284	25.2117	107.696	181.523	c1cn[nH]c1	Pyr
CN(c1c(CO[N+](=O)[O-])nn(CCO[N+](=O)[O-])c1CO[N+](=O)[O-])[N+](=O)[O-]	1.64458	7.67266	24.5166	109.977	186.929	c1cn[nH]c1	Pyr
O=[N+]([O-])OCCN(c1nc(CO[N+](=O)[O-])cn1CCO[N+](=O)[O-])[N+](=O)[O-]	1.66269	7.67163	24.9223	87.1868	176.306	c1c[nH]cn1	Imi
Cc1c([N+](=O)[O-])nnn1CCO[N+](=O)[O-]	1.59224	7.67057	22.2619	87.0166	199.179	c1c[nH]nn1	Tra-1
O=[N+]([O-])OCc1cncn1CO[N+](=O)[O-]	1.6242	7.67052	24.1018	62.5325	186.037	c1c[nH]cn1	Imi
Cn1nc(N(CCO[N+](=O)[O-])[N+](=O)[O-])nc1CCO[N+](=O)[O-]	1.59031	7.67049	22.5687	73.6886	171.235	c1nc[nH]n1	Tra-4
CN(c1nc(CCO[N+](=O)[O-])n(CO[N+](=O)[O-])c1CO[N+](=O)[O-])[N+](=O)[O-]	1.64869	7.6701	24.9459	93.994	173.968	c1c[nH]cn1	Imi
O=[N+]([O-])OCCc1nnn(CCO[N+](=O)[O-])c1CO[N+](=O)[O-]	1.62074	7.66959	22.4807	64.4273	162.046	c1c[nH]nn1	Tra-1
COc1c([N+](=O)[O-])nn(CO[N+](=O)[O-])c1CO[N+](=O)[O-]	1.67096	7.66875	26.2081	88.9962	175.232	c1cn[nH]c1	Pyr
Cn1nc(CCO[N+](=O)[O-])nc1[N+](=O)[O-]	1.5796	7.66875	21.9751	88.6709	200.803	c1nc[nH]n1	Tra-4
CN(c1nn(CCO[N+](=O)[O-])c(N(C)[N+](=O)[O-])c1N(C)[N+](=O)[O-])[N+](=O)[O-]	1.60812	7.66818	24.5407	153.043	215.263	c1cn[nH]c1	Pyr
CN(c1nc(CO[N+](=O)[O-])c(N(CCO[N+](=O)[O-])[N+](=O)[O-])n1C)[N+](=O)[O-]	1.61419	7.6671	25.408	132.455	217.396	c1c[nH]cn1	Imi
CN(c1c(CCO[N+](=O)[O-])c([N+](=O)[O-])nn1CCO[N+](=O)[O-])[N+](=O)[O-]	1.62289	7.66694	24.3366	112.92	209.119	c1cn[nH]c1	Pyr
Cn1c(CCO[N+](=O)[O-])nc([N+](=O)[O-])c1N(CCO[N+](=O)[O-])[N+](=O)[O-]	1.62503	7.66611	24.2367	101.518	196.619	c1c[nH]cn1	Imi
CN(c1nn(CCO[N+](=O)[O-])c(CO[N+](=O)[O-])c1N(C)[N+](=O)[O-])[N+](=O)[O-]	1.62625	7.666	24.7306	113.632	187.19	c1cn[nH]c1	Pyr
CN(c1cc(N(CCO[N+](=O)[O-])[N+](=O)[O-])n(CCO[N+](=O)[O-])n1)[N+](=O)[O-]	1.63497	7.66583	24.9475	115.386	199.166	c1cn[nH]c1	Pyr
CN(c1nc(CO[N+](=O)[O-])c(CO[N+](=O)[O-])n1CCO[N+](=O)[O-])[N+](=O)[O-]	1.64283	7.66509	24.917	106.693	195.887	c1c[nH]cn1	Imi
Cn1nc([N+](=O)[O-])c(N(CCO[N+](=O)[O-])[N+](=O)[O-])c1CCO[N+](=O)[O-]	1.62435	7.6636	24.3823	101.748	198.48	c1cn[nH]c1	Pyr
COc1nnoc1N(CCO[N+](=O)[O-])[N+](=O)[O-]	1.63879	7.66356	25.3818	50.313	162.62	c1conn1	Oxa-4
O=[N+]([O-])OCCc1c(CO[N+](=O)[O-])nc([N+](=O)[O-])n1CCO[N+](=O)[O-]	1.66084	7.66342	24.4638	89.2229	187.654	c1c[nH]cn1	Imi
Cc1nc(N(CCO[N+](=O)[O-])[N+](=O)[O-])nn1CCO[N+](=O)[O-]	1.58343	7.66217	22.5815	77.9983	175.023	c1nc[nH]n1	Tra-4
Cn1cc(N(CCO[N+](=O)[O-])[N+](=O)[O-])nn1	1.57363	7.66201	23.1081	75.167	173.47	c1c[nH]nn1	Tra-1
Cn1nnc(CCO[N+](=O)[O-])c1N(CCO[N+](=O)[O-])[N+](=O)[O-]	1.58787	7.66184	22.7811	76.3717	175.119	c1c[nH]nn1	Tra-1
Cn1c(CCO[N+](=O)[O-])nc(N(CCO[N+](=O)[O-])[N+](=O)[O-])c1[N+](=O)[O-]	1.6335	7.6616	24.3902	98.6515	188.888	c1c[nH]cn1	Imi
Cc1nc([N+](=O)[O-])nn1CCO[N+](=O)[O-]	1.59352	7.66121	22.2859	85.4525	199.744	c1nc[nH]n1	Tra-4
COc1noc(N(CCO[N+](=O)[O-])[N+](=O)[O-])n1	1.64064	7.66051	25.4918	44.5706	156.832	c1ncon1	Oxa-3
Cn1nc(CCO[N+](=O)[O-])c(N(CCO[N+](=O)[O-])[N+](=O)[O-])n1	1.59105	7.66046	22.8824	71.3283	170.984	c1cn[nH]n1	Tra-2
CN(c1nc(N(C)[N+](=O)[O-])n(CO[N+](=O)[O-])c1CCO[N+](=O)[O-])[N+](=O)[O-]	1.62115	7.66025	24.6228	124.938	197.424	c1c[nH]cn1	Imi
CN(c1cc(N(CCO[N+](=O)[O-])[N+](=O)[O-])nn1CCO[N+](=O)[O-])[N+](=O)[O-]	1.63699	7.65977	24.9029	114.551	192.952	c1cn[nH]c1	Pyr
COc1nc(N(CCO[N+](=O)[O-])[N+](=O)[O-])n(CO[N+](=O)[O-])c1N(CCO[N+](=O)[O-])[N+](=O)[O-]	1.65831	7.6575	26.6427	91.0476	167.837	c1c[nH]cn1	Imi
Cc1nn(CCO[N+](=O)[O-])c(N(CCO[N+](=O)[O-])[N+](=O)[O-])c1[N+](=O)[O-]	1.63304	7.65725	24.7939	103.865	201.835	c1cn[nH]c1	Pyr
COc1nnc(N(CCO[N+](=O)[O-])[N+](=O)[O-])o1	1.63774	7.65713	25.3794	45.6113	157.614	c1nnco1	Oxa-2
Cc1c(CO[N+](=O)[O-])nn(CO[N+](=O)[O-])c1CO[N+](=O)[O-]	1.6219	7.6569	23.6366	80.6556	170.28	c1cn[nH]c1	Pyr
CN(c1nc(N(C)[N+](=O)[O-])n(CCO[N+](=O)[O-])c1N(C)[N+](=O)[O-])[N+](=O)[O-]	1.61091	7.65634	24.5586	148.618	209.666	c1c[nH]cn1	Imi
Cn1c(CCO[N+](=O)[O-])nnc1[N+](=O)[O-]	1.58809	7.65621	22.0784	88.8057	202.17	c1nnc[nH]1	Tra-3
Cn1c(N(CCO[N+](=O)[O-])[N+](=O)[O-])nc(CCO[N+](=O)[O-])c1[N+](=O)[O-]	1.63525	7.656	24.4916	102.621	192.444	c1c[nH]cn1	Imi
CN(c1nc(CCO[N+](=O)[O-])n(CO[N+](=O)[O-])c1N(C)[N+](=O)[O-])[N+](=O)[O-]	1.62582	7.65517	24.6868	115.537	185.974	c1c[nH]cn1	Imi
Cc1c(N(CCO[N+](=O)[O-])[N+](=O)[O-])cnn1CO[N+](=O)[O-]	1.59817	7.65378	23.0153	87.3692	181.808	c1cn[nH]c1	Pyr
O=[N+]([O-])OCCc1nn(CO[N+](=O)[O-])nc1CCO[N+](=O)[O-]	1.62604	7.65374	22.9881	62.7006	162.819	c1cn[nH]n1	Tra-2
Cc1c(N(CCO[N+](=O)[O-])[N+](=O)[O-])nnn1CCO[N+](=O)[O-]	1.58893	7.65366	22.6215	74.8626	172.525	c1c[nH]nn1	Tra-1
Cn1ncc(N(CCO[N+](=O)[O-])[N+](=O)[O-])c1N(CCO[N+](=O)[O-])[N+](=O)[O-]	1.63184	7.65325	25.3167	117.442	201.37	c1cn[nH]c1	Pyr
COc1nc(N(CCO[N+](=O)[O-])[N+](=O)[O-])c(N(CCO[N+](=O)[O-])[N+](=O)[O-])n1CO[N+](=O)[O-]	1.65286	7.653	26.6124	98.1733	174.478	c1c[nH]cn1	Imi
Cc1nn(CCO[N+](=O)[O-])nc1N(CCO[N+](=O)[O-])[N+](=O)[O-]	1.59374	7.65287	22.9145	70.5363	168.812	c1cn[nH]n1	Tra-2
O=[N+]([O-])OCCc1nn(CO[N+](=O)[O-])c(CCO[N+](=O)[O-])c1N(CCO[N+](=O)[O-])[N+](=O)[O-]	1.66295	7.65182	24.9004	107.15	190.299	c1cn[nH]c1	Pyr
Cn1cnc(N(CCO[N+](=O)[O-])[N+](=O)[O-])c1N(CCO[N+](=O)[O-])[N+](=O)[O-]	1.62844	7.65164	25.6536	115.08	205.65	c1c[nH]cn1	Imi
Cc1nc(N(CCO[N+](=O)[O-])[N+](=O)[O-])n(CCO[N+](=O)[O-])n1	1.59106	7.65153	22.9783	71.041	170.576	c1nc[nH]n1	Tra-4
Cc1nnc([N+](=O)[O-])n1CCO[N+](=O)[O-]	1.58743	7.65138	22.5362	78.388	195.189	c1nnc[nH]1	Tra-3
Cc1c(N(CCO[N+](=O)[O-])[N+](=O)[O-])nn(CCO[N+](=O)[O-])c1[N+](=O)[O-]	1.63227	7.65048	24.5688	109.797	202.103	c1cn[nH]c1	Pyr
Cn1c(CO[N+](=O)[O-])nc(N(CCO[N+](=O)[O-])[N+](=O)[O-])c1CO[N+](=O)[O-]	1.64021	7.64893	24.8408	102.425	184.608	c1c[nH]cn1	Imi
CN(c1nn(CCO[N+](=O)[O-])c(N(CCO[N+](=O)[O-])[N+](=O)[O-])c1CCO[N+](=O)[O-])[N+](=O)[O-]	1.63777	7.64865	24.6068	107.716	195.06	c1cn[nH]c1	Pyr
CN(c1c(CCO[N+](=O)[O-])c(N(CCO[N+](=O)[O-])[N+](=O)[O-])nn1CCO[N+](=O)[O-])[N+](=O)[O-]	1.6386	7.64794	24.7489	102.341	191.536	c1cn[nH]c1	Pyr
O=[N+]([O-])OCCc1c(CO[N+](=O)[O-])c([N+](=O)[O-])nn1CCO[N+](=O)[O-]	1.66147	7.64775	24.3254	90.0591	191.712	c1cn[nH]c1	Pyr
CN(c1c(CCO[N+](=O)[O-])nnn1CCO[N+](=O)[O-])[N+](=O)[O-]	1.59434	7.64768	22.407	73.5887	170.595	c1c[nH]nn1	Tra-1
Cn1nc(CCO[N+](=O)[O-])c([N+](=O)[O-])n1	1.59814	7.64738	22.8668	75.7931	193.234	c1cn[nH]n1	Tra-2
Cn1nnc([N+](=O)[O-])c1CCO[N+](=O)[O-]	1.58577	7.64735	22.3842	77.523	194.058	c1c[nH]nn1	Tra-1
CN(c1c(CO[N+](=O)[O-])nn(CCO[N+](=O)[O-])c1N(C)[N+](=O)[O-])[N+](=O)[O-]	1.62235	7.64706	24.5006	122.804	188.815	c1cn[nH]c1	Pyr
CN(c1nc([N+](=O)[O-])n(CCO[N+](=O)[O-])c1CCO[N+](=O)[O-])[N+](=O)[O-]	1.62667	7.64685	24.2823	99.8176	198.479	c1c[nH]cn1	Imi
COc1nn(CO[N+](=O)[O-])c(CO[N+](=O)[O-])c1[N+](=O)[O-]	1.66949	7.64578	26.2501	92.9984	180.541	c1cn[nH]c1	Pyr
Cn1c(CCO[N+](=O)[O-])nnc1N(CCO[N+](=O)[O-])[N+](=O)[O-]	1.59204	7.64574	22.5709	72.9588	171.255	c1nnc[nH]1	Tra-3
O=[N+]([O-])OCCc1nc([N+](=O)[O-])c(CCO[N+](=O)[O-])n1CO[N+](=O)[O-]	1.66222	7.64539	24.468	90.5507	193.437	c1c[nH]cn1	Imi
Cn1ncc([N+](=O)[O-])n1	1.581	7.64427	22.1664	80.8532	220.85	c1cn[nH]n1	Tra-2
COc1nc(CO[N+](=O)[O-])n(CO[N+](=O)[O-])c1[N+](=O)[O-]	1.66794	7.64323	26.4176	94.634	176.328	c1c[nH]cn1	Imi
CN(c1nc(N(CCO[N+](=O)[O-])[N+](=O)[O-])c(N(C)[N+](=O)[O-])n1C)[N+](=O)[O-]	1.60985	7.64281	24.7424	148.86	204.539	c1c[nH]cn1	Imi
O=[N+]([O-])OCCc1nc(CCO[N+](=O)[O-])n(CO[N+](=O)[O-])n1	1.6232	7.64236	22.6873	63.8182	162.983	c1nc[nH]n1	Tra-4
Cn1nc(CCO[N+](=O)[O-])c(N(CCO[N+](=O)[O-])[N+](=O)[O-])c1N(CCO[N+](=O)[O-])[N+](=O)[O-]	1.63368	7.642	25.0145	106.289	197.362	c1cn[nH]c1	Pyr
O=[N+]([O-])OCCc1nc(CO[N+](=O)[O-])n(CCO[N+](=O)[O-])n1	1.61986	7.64194	22.4109	65.7607	164.984	c1nc[nH]n1	Tra-4
Cc1nnc(N(CCO[N+](=O)[O-])[N+](=O)[O-])n1CCO[N+](=O)[O-]	1.59426	7.64185	22.8826	69.215	169.125	c1nnc[nH]1	Tra-3
Cc1c([N+](=O)[O-])nc(N(CCO[N+](=O)[O-])[N+](=O)[O-])n1CCO[N+](=O)[O-]	1.62738	7.64045	24.5132	103.388	200.398	c1c[nH]cn1	Imi
O=[N+]([O-])OCCc1cnn(CO[N+](=O)[O-])c1CO[N+](=O)[O-]	1.63375	7.63985	23.2752	71.0964	169.944	c1cn[nH]c1	Pyr
COc1nn(CO[N+](=O)[O-])c([N+](=O)[O-])c1N(C)[N+](=O)[O-]	1.64674	7.63959	25.7032	99.7382	180.414	c1cn[nH]c1	Pyr
COc1nonc1N(CCO[N+](=O)[O-])[N+](=O)[O-]	1.64187	7.63945	25.7627	48.6427	154.523	c1cnon1	Oxa-1
Cn1nc(N(CCO[N+](=O)[O-])[N+](=O)[O-])c(N(CCO[N+](=O)[O-])[N+](=O)[O-])c1CCO[N+](=O)[O-]	1.62751	7.63929	25.2011	116.817	207.025	c1cn[nH]c1	Pyr
COc1c(CO[N+](=O)[O-])nnn1CO[N+](=O)[O-]	1.61857	7.63925	23.9716	74.1992	164.854	c1c[nH]nn1	Tra-1
COc1c(N(CCO[N+](=O)[O-])[N+](=O)[O-])nn(CO[N+](=O)[O-])c1N(CCO[N+](=O)[O-])[N+](=O)[O-]	1.64988	7.63923	26.545	116.675	186.655	c1cn[nH]c1	Pyr
COc1nc([N+](=O)[O-])n(CO[N+](=O)[O-])c1CO[N+](=O)[O-]	1.66401	7.63821	26.4276	94.6184	174.352	c1c[nH]cn1	Imi
CN(c1cn(CCO[N+](=O)[O-])nc1N(CCO[N+](=O)[O-])[N+](=O)[O-])[N+](=O)[O-]	1.63103	7.63786	24.8114	122.827	204.558	c1cn[nH]c1	Pyr
Cc1cc(N(CCO[N+](=O)[O-])[N+](=O)[O-])nn1CO[N+](=O)[O-]	1.60721	7.63776	23.433	82.787	179.29	c1cn[nH]c1	Pyr
Cc1nn(CO[N+](=O)[O-])c(CO[N+](=O)[O-])c1CO[N+](=O)[O-]	1.61532	7.63773	23.5512	85.4763	179.881	c1cn[nH]c1	Pyr
O=[N+]([O-])OCCN(c1nn(CCO[N+](=O)[O-])cc1CO[N+](=O)[O-])[N+](=O)[O-]	1.65885	7.63737	24.7335	97.9561	184.398	c1cn[nH]c1	Pyr
O=[N+]([O-])OCCc1nn(CO[N+](=O)[O-])c(N(CCO[N+](=O)[O-])[N+](=O)[O-])c1CCO[N+](=O)[O-]	1.67303	7.63703	24.6307	110.571	196.168	c1cn[nH]c1	Pyr
O=[N+]([O-])OCCc1nc([N+](=O)[O-])c(CO[N+](=O)[O-])n1CCO[N+](=O)[O-]	1.6601	7.63691	24.2558	90.8151	193.641	c1c[nH]cn1	Imi
COc1c(CO[N+](=O)[O-])c([N+](=O)[O-])nn1CO[N+](=O)[O-]	1.66395	7.6363	25.928	92.635	184.759	c1cn[nH]c1	Pyr
O=[N+]([O-])OCCc1cn(CO[N+](=O)[O-])nc1CO[N+](=O)[O-]	1.63237	7.63628	23.1503	72.3978	169.884	c1cn[nH]c1	Pyr
COc1nn(CO[N+](=O)[O-])nc1CO[N+](=O)[O-]	1.62359	7.6352	24.3105	69.7097	163.377	c1cn[nH]n1	Tra-2
CN(c1nn(CO[N+](=O)[O-])c(CCO[N+](=O)[O-])c1N(C)[N+](=O)[O-])[N+](=O)[O-]	1.62301	7.63507	24.8237	123.493	194.693	c1cn[nH]c1	Pyr
Cn1c(CO[N+](=O)[O-])cnc1N(CCO[N+](=O)[O-])[N+](=O)[O-]	1.59795	7.63462	22.8696	85.6647	179.891	c1c[nH]cn1	Imi
O=[N+]([O-])OCCc1nnc(CCO[N+](=O)[O-])n1CO[N+](=O)[O-]	1.62079	7.63452	22.4809	63.9052	163.869	c1nnc[nH]1	Tra-3
Cn1nc([N+](=O)[O-])nc1CCO[N+](=O)[O-]	1.59907	7.63431	22.5941	80.5734	196.818	c1nc[nH]n1	Tra-4
CN(c1nc(CO[N+](=O)[O-])n(CCO[N+](=O)[O-])c1CO[N+](=O)[O-])[N+](=O)[O-]	1.64401	7.634	24.6947	103.286	179.319	c1c[nH]cn1	Imi
Cc1c(CO[N+](=O)[O-])c(CO[N+](=O)[O-])nn1CO[N+](=O)[O-]	1.61922	7.63261	23.5802	81.5753	171.277	c1cn[nH]c1	Pyr
O=[N+]([O-])OCCc1nnn(CO[N+](=O)[O-])c1CCO[N+](=O)[O-]	1.62306	7.63226	22.7266	67.9907	165.78	c1c[nH]nn1	Tra-1
CN(c1c(CCO[N+](=O)[O-])cnn1CO[N+](=O)[O-])[N+](=O)[O-]	1.59721	7.63015	23.0428	90.7372	185.206	c1cn[nH]c1	Pyr
Cc1nn(CO[N+](=O)[O-])cc1[N+](=O)[O-]	1.5964	7.63006	22.7626	92.5102	211.595	c1cn[nH]c1	Pyr
Cn1c([N+](=O)[O-])nc(CCO[N+](=O)[O-])c1N(CCO[N+](=O)[O-])[N+](=O)[O-]	1.62893	7.62998	24.4943	101.289	196.649	c1c[nH]cn1	Imi
COc1c(N(C)[N+](=O)[O-])nn(CO[N+](=O)[O-])c1[N+](=O)[O-]	1.64707	7.62934	25.7648	101.357	179.325	c1cn[nH]c1	Pyr
CN(c1nn(CCO[N+](=O)[O-])c(CCO[N+](=O)[O-])c1[N+](=O)[O-])[N+](=O)[O-]	1.63785	7.62923	24.3002	100.962	190.843	c1cn[nH]c1	Pyr
COc1c(N(CCO[N+](=O)[O-])[N+](=O)[O-])nc(N(CCO[N+](=O)[O-])[N+](=O)[O-])n1CO[N+](=O)[O-]	1.65447	7.6292	26.299	106.076	175.237	c1c[nH]cn1	Imi
Cn1c(CCO[N+](=O)[O-])nc(N(CCO[N+](=O)[O-])[N+](=O)[O-])c1N(CCO[N+](=O)[O-])[N+](=O)[O-]	1.63112	7.62919	25.0545	107.063	197.926	c1c[nH]cn1	Imi
O=[N+]([O-])OCCc1c([N+](=O)[O-])nc(CO[N+](=O)[O-])n1CCO[N+](=O)[O-]	1.65993	7.62894	24.2773	92.6113	196.876	c1c[nH]cn1	Imi
O=[N+]([O-])OCCc1nn(CCO[N+](=O)[O-])nc1N(CCO[N+](=O)[O-])[N+](=O)[O-]	1.65232	7.62884	24.4529	89.7007	174.949	c1cn[nH]n1	Tra-2
CN(c1nc(N(C)[N+](=O)[O-])n(C)c1N(CCO[N+](=O)[O-])[N+](=O)[O-])[N+](=O)[O-]	1.60315	7.6288	24.5655	158.787	216.407	c1c[nH]cn1	Imi
Cn1cc([N+](=O)[O-])nn1	1.58073	7.62875	22.0895	82.5114	221.889	c1c[nH]nn1	Tra-1
O=[N+]([O-])OCCc1c(CO[N+](=O)[O-])cnn1CO[N+](=O)[O-]	1.6311	7.62871	23.1674	73.4686	173.588	c1cn[nH]c1	Pyr
COc1c([N+](=O)[O-])c(N(C)[N+](=O)[O-])nn1CO[N+](=O)[O-]	1.64627	7.62821	25.4309	100.467	181.411	c1cn[nH]c1	Pyr
Cn1ncnc1[N+](=O)[O-]	1.56708	7.62725	22.3988	78.9488	214.223	c1nc[nH]n1	Tra-4
COc1c(N(C)[N+](=O)[O-])c([N+](=O)[O-])nn1CO[N+](=O)[O-]	1.63837	7.62712	25.2293	103.868	183.686	c1cn[nH]c1	Pyr
Cc1nc(CO[N+](=O)[O-])n(CO[N+](=O)[O-])c1CO[N+](=O)[O-]	1.61895	7.6271	23.6558	80.1286	171.023	c1c[nH]cn1	Imi
Cc1c([N+](=O)[O-])cnn1CO[N+](=O)[O-]	1.59552	7.62663	22.6826	94.49	212.258	c1cn[nH]c1	Pyr
Cn1cnc([N+](=O)[O-])n1	1.58362	7.62623	22.1358	83.7244	221.421	c1nc[nH]n1	Tra-4
CN(c1nc(CCO[N+](=O)[O-])n(CCO[N+](=O)[O-])c1[N+](=O)[O-])[N+](=O)[O-]	1.63315	7.62557	24.1777	102.962	194.195	c1c[nH]cn1	Imi
COc1nc(N(C)[N+](=O)[O-])c([N+](=O)[O-])n1CO[N+](=O)[O-]	1.64548	7.62505	25.5841	97.2462	180.04	c1c[nH]cn1	Imi
Cc1nc([N+](=O)[O-])n(CCO[N+](=O)[O-])c1N(CCO[N+](=O)[O-])[N+](=O)[O-]	1.62344	7.62501	24.5673	112.041	209.921	c1c[nH]cn1	Imi
COc1c(N(C)[N+](=O)[O-])nc([N+](=O)[O-])n1CO[N+](=O)[O-]	1.64415	7.62436	25.5247	98.789	181.662	c1c[nH]cn1	Imi
O=[N+]([O-])OCCc1c(CO[N+](=O)[O-])nc(N(CCO[N+](=O)[O-])[N+](=O)[O-])n1CCO[N+](=O)[O-]	1.66818	7.62408	24.3483	87.9638	172.593	c1c[nH]cn1	Imi
O=[N+]([O-])OCCc1nc(CO[N+](=O)[O-])nn1CCO[N+](=O)[O-]	1.62187	7.62294	22.4982	63.4015	161.966	c1nc[nH]n1	Tra-4
CN(c1c(CCO[N+](=O)[O-])ncn1CO[N+](=O)[O-])[N+](=O)[O-]	1.59775	7.62285	22.8641	88.9813	183.299	c1c[nH]cn1	Imi
CN(c1nc(N(CCO[N+](=O)[O-])[N+](=O)[O-])c(CO[N+](=O)[O-])n1C)[N+](=O)[O-]	1.62036	7.62276	24.836	120.369	185.289	c1c[nH]cn1	Imi
COc1nc(CO[N+](=O)[O-])nn1CO[N+](=O)[O-]	1.62114	7.6226	24.3307	66.8102	159.492	c1nc[nH]n1	Tra-4
CN(c1cncn1CO[N+](=O)[O-])[N+](=O)[O-]	1.5933	7.62187	23.4271	79.0975	187.555	c1c[nH]cn1	Imi
CN(c1cn(CCO[N+](=O)[O-])c(N(CCO[N+](=O)[O-])[N+](=O)[O-])n1)[N+](=O)[O-]	1.63279	7.62187	24.7567	118.137	197.052	c1c[nH]cn1	Imi
O=[N+]([O-])OCCc1ncc(CO[N+](=O)[O-])n1CO[N+](=O)[O-]	1.62574	7.62183	22.9436	76.2924	173.8	c1c[nH]cn1	Imi
O=[N+]([O-])OCCc1nc(CO[N+](=O)[O-])c([N+](=O)[O-])n1CCO[N+](=O)[O-]	1.66314	7.62143	24.4398	97.6143	197.297	c1c[nH]cn1	Imi
Cn1nncc1[N+](=O)[O-]	1.56281	7.6206	22.298	74.7045	215.467	c1c[nH]nn1	Tra-1
COc1c([N+](=O)[O-])nn(CCO[N+](=O)[O-])c1[N+](=O)[O-]	1.66285	7.62005	24.9903	95.9814	201.035	c1cn[nH]c1	Pyr
COc1onnc1N(CCO[N+](=O)[O-])[N+](=O)[O-]	1.63576	7.61906	25.5586	57.3836	157.51	c1conn1	Oxa-4
Cc1c(CO[N+](=O)[O-])nc(N(C)[N+](=O)[O-])n1CO[N+](=O)[O-]	1.59073	7.61891	23.1358	93.064	183.601	c1c[nH]cn1	Imi
O=[N+]([O-])OCCn1cc(CO[N+](=O)[O-])c(CO[N+](=O)[O-])n1	1.63214	7.61847	22.9038	72.7011	168.027	c1cn[nH]c1	Pyr
COc1c([N+](=O)[O-])nn(CO[N+](=O)[O-])c1N(C)[N+](=O)[O-]	1.63793	7.61804	25.3676	108.074	178.717	c1cn[nH]c1	Pyr
Cc1c(CO[N+](=O)[O-])nn(CO[N+](=O)[O-])c1N(C)[N+](=O)[O-]	1.59268	7.61775	23.3472	94.2599	181.102	c1cn[nH]c1	Pyr
Cc1cn(CO[N+](=O)[O-])nc1[N+](=O)[O-]	1.60372	7.61765	22.9162	94.6052	215.318	c1cn[nH]c1	Pyr
CN(c1nc(CCO[N+](=O)[O-])nn1CCO[N+](=O)[O-])[N+](=O)[O-]	1.5938	7.61755	22.5708	74.2674	169.099	c1nc[nH]n1	Tra-4
Cc1ncc(N(CCO[N+](=O)[O-])[N+](=O)[O-])n1CO[N+](=O)[O-]	1.59604	7.61724	23.2741	85.8178	184.427	c1c[nH]cn1	Imi
CN(c1c(CO[N+](=O)[O-])cnn1CCO[N+](=O)[O-])[N+](=O)[O-]	1.59774	7.61628	22.8627	88.9632	183.276	c1cn[nH]c1	Pyr
O=[N+]([O-])OCCc1c(N(CCO[N+](=O)[O-])[N+](=O)[O-])nn(CO[N+](=O)[O-])c1CCO[N+](=O)[O-]	1.67172	7.61606	24.564	87.846	172.271	c1cn[nH]c1	Pyr
O=[N+]([O-])OCCc1cn(CO[N+](=O)[O-])c(CO[N+](=O)[O-])n1	1.63457	7.61591	23.0565	71.4725	168.038	c1c[nH]cn1	Imi
COc1nc([N+](=O)[O-])c(CO[N+](=O)[O-])n1CO[N+](=O)[O-]	1.66305	7.61544	26.3846	95.7488	172.285	c1c[nH]cn1	Imi
Cc1cc([N+](=O)[O-])nn1CO[N+](=O)[O-]	1.60316	7.615	22.9306	93.9859	215.748	c1cn[nH]c1	Pyr
Cn1nnc(N(CCO[N+](=O)[O-])[N+](=O)[O-])c1CCO[N+](=O)[O-]	1.58997	7.61432	22.925	72.885	173.089	c1c[nH]nn1	Tra-1
Cn1c(N(CCO[N+](=O)[O-])[N+](=O)[O-])nc(N(CCO[N+](=O)[O-])[N+](=O)[O-])c1CCO[N+](=O)[O-]	1.63434	7.61389	24.7663	105.873	194.057	c1c[nH]cn1	Imi
COc1c([N+](=O)[O-])nc(CO[N+](=O)[O-])n1CO[N+](=O)[O-]	1.66419	7.61302	26.3835	97.9764	172.941	c1c[nH]cn1	Imi
Cc1nc([N+](=O)[O-])c(N(CCO[N+](=O)[O-])[N+](=O)[O-])n1CCO[N+](=O)[O-]	1.62555	7.61265	24.5216	105.117	198.166	c1c[nH]cn1	Imi
O=[N+]([O-])OCCN(c1cncn1CCO[N+](=O)[O-])[N+](=O)[O-]	1.61959	7.61244	22.9249	75.0868	173.171	c1c[nH]cn1	Imi
O=[N+]([O-])OCCn1ncc(CO[N+](=O)[O-])c1CO[N+](=O)[O-]	1.63229	7.61216	23.0884	71.2583	170.546	c1cn[nH]c1	Pyr
Cc1nc(CO[N+](=O)[O-])n(CO[N+](=O)[O-])c1N(C)[N+](=O)[O-]	1.59041	7.61202	23.24	94.1051	182.616	c1c[nH]cn1	Imi
COc1nc([N+](=O)[O-])n(CCO[N+](=O)[O-])c1[N+](=O)[O-]	1.66617	7.6118	25.45	92.129	197.484	c1c[nH]cn1	Imi
Cc1nn(CO[N+](=O)[O-])c([N+](=O)[O-])c1CCO[N+](=O)[O-]	1.60946	7.61178	23.0044	92.5302	197.989	c1cn[nH]c1	Pyr
Cn1nc(CCO[N+](=O)[O-])c(N(CCO[N+](=O)[O-])[N+](=O)[O-])c1[N+](=O)[O-]	1.62961	7.61171	24.5667	106.561	201.135	c1cn[nH]c1	Pyr
Cn1nc(CO[N+](=O)[O-])cc1[N+](=O)[O-]	1.59657	7.61122	22.621	96.0788	215.709	c1cn[nH]c1	Pyr
CN(c1c(CO[N+](=O)[O-])nn(C)c1CO[N+](=O)[O-])[N+](=O)[O-]	1.59558	7.6108	23.1513	89.218	179.545	c1cn[nH]c1	Pyr
CN(c1c(N(CCO[N+](=O)[O-])[N+](=O)[O-])c(CCO[N+](=O)[O-])nn1CCO[N+](=O)[O-])[N+](=O)[O-]	1.63449	7.61065	24.6405	122.339	210.427	c1cn[nH]c1	Pyr
Cc1cn(CO[N+](=O)[O-])c(N(CCO[N+](=O)[O-])[N+](=O)[O-])n1	1.60553	7.61049	23.6249	77.1107	177.352	c1c[nH]cn1	Imi
Cn1nc(CCO[N+](=O)[O-])nc1N(CCO[N+](=O)[O-])[N+](=O)[O-]	1.59221	7.61045	22.8419	72.3351	167.837	c1nc[nH]n1	Tra-4
Cc1nc(CO[N+](=O)[O-])c(N(C)[N+](=O)[O-])n1CO[N+](=O)[O-]	1.59398	7.61021	23.2389	89.9309	179.17	c1c[nH]cn1	Imi
O=[N+]([O-])OCCn1cc([N+](=O)[O-])cn1	1.61091	7.61008	22.2125	92.4069	211.661	c1cn[nH]c1	Pyr
Cc1c(N(CCO[N+](=O)[O-])[N+](=O)[O-])ncn1CO[N+](=O)[O-]	1.60364	7.61006	23.1738	81.4666	179.495	c1c[nH]cn1	Imi
O=[N+]([O-])OCCN(c1ccn(CCO[N+](=O)[O-])n1)[N+](=O)[O-]	1.60992	7.60991	22.8895	79.4736	173.191	c1cn[nH]c1	Pyr
Cn1cnnc1[N+](=O)[O-]	1.56487	7.60979	22.3467	79.3061	214.29	c1nnc[nH]1	Tra-3
CN(c1nn(CCO[N+](=O)[O-])c(CCO[N+](=O)[O-])c1N(CCO[N+](=O)[O-])[N+](=O)[O-])[N+](=O)[O-]	1.63986	7.60961	24.4736	101.417	188.029	c1cn[nH]c1	Pyr
COc1nn(CCO[N+](=O)[O-])c([N+](=O)[O-])c1[N+](=O)[O-]	1.66796	7.60947	25.3249	96.0009	200.365	c1cn[nH]c1	Pyr
Cc1cnn(CO[N+](=O)[O-])c1[N+](=O)[O-]	1.59319	7.60916	23.1402	86.1791	215.812	c1cn[nH]c1	Pyr
Cc1ncn(CO[N+](=O)[O-])c1[N+](=O)[O-]	1.60136	7.60866	23.0645	87.3861	214.519	c1c[nH]cn1	Imi
Cc1nonc1CO[N+](=O)[O-]	1.57674	7.60861	22.1471	52.557	187.216	c1cnon1	Oxa-1
Cc1nnoc1CO[N+](=O)[O-]	1.58221	7.60858	22.1824	56.1351	189.845	c1conn1	Oxa-4
Cc1onnc1CO[N+](=O)[O-]	1.58252	7.60787	22.1449	56.8712	190.319	c1conn1	Oxa-4
O=[N+]([O-])OCCc1nc(N(CCO[N+](=O)[O-])[N+](=O)[O-])n(CCO[N+](=O)[O-])c1CO[N+](=O)[O-]	1.66828	7.60784	24.5478	96.3893	182.362	c1c[nH]cn1	Imi
Cc1noc(CO[N+](=O)[O-])n1	1.57837	7.60783	21.9068	70.65	196.372	c1ncon1	Oxa-3
Cc1ncn(CO[N+](=O)[O-])c1N(CCO[N+](=O)[O-])[N+](=O)[O-]	1.59719	7.60753	23.4478	85.4313	185.127	c1c[nH]cn1	Imi
Cn1ncc(N(CCO[N+](=O)[O-])[N+](=O)[O-])c1CO[N+](=O)[O-]	1.60429	7.60703	23.2605	80.9021	179.987	c1cn[nH]c1	Pyr
Cn1nc([N+](=O)[O-])c(CCO[N+](=O)[O-])c1N(CCO[N+](=O)[O-])[N+](=O)[O-]	1.62991	7.60696	24.6271	106.943	196.939	c1cn[nH]c1	Pyr
Cc1c(N(C)[N+](=O)[O-])nn(CO[N+](=O)[O-])c1CO[N+](=O)[O-]	1.59444	7.60687	23.4483	92.1424	180.64	c1cn[nH]c1	Pyr
CN(c1nc(N(CCO[N+](=O)[O-])[N+](=O)[O-])c(CCO[N+](=O)[O-])n1CCO[N+](=O)[O-])[N+](=O)[O-]	1.62938	7.60642	24.8189	123.227	211.856	c1c[nH]cn1	Imi
Cn1nc(N(CCO[N+](=O)[O-])[N+](=O)[O-])c(CCO[N+](=O)[O-])c1N(CCO[N+](=O)[O-])[N+](=O)[O-]	1.63757	7.60613	24.966	105.33	193.32	c1cn[nH]c1	Pyr
O=[N+]([O-])OCCc1cc(CO[N+](=O)[O-])n(CO[N+](=O)[O-])n1	1.62919	7.60526	23.1597	75.7227	177.141	c1cn[nH]c1	Pyr
O=[N+]([O-])OCCN(c1nccn1CCO[N+](=O)[O-])[N+](=O)[O-]	1.61416	7.60376	23.0321	74.6769	172.353	c1c[nH]cn1	Imi
Cn1c([N+](=O)[O-])cnc1CO[N+](=O)[O-]	1.59691	7.60315	22.5196	98.01	216.755	c1c[nH]cn1	Imi
CN(c1c(N(CCO[N+](=O)[O-])[N+](=O)[O-])nn(CCO[N+](=O)[O-])c1CCO[N+](=O)[O-])[N+](=O)[O-]	1.63963	7.60313	24.5985	103.641	189.475	c1cn[nH]c1	Pyr
CN(c1cnc(N(CCO[N+](=O)[O-])[N+](=O)[O-])n1C)[N+](=O)[O-]	1.58736	7.60265	22.9531	106.92	193.778	c1c[nH]cn1	Imi
COc1nn(CO[N+](=O)[O-])c(N(CCO[N+](=O)[O-])[N+](=O)[O-])c1N(CCO[N+](=O)[O-])[N+](=O)[O-]	1.65332	7.60168	26.951	110.817	183.983	c1cn[nH]c1	Pyr
Cc1nc([N+](=O)[O-])cn1CO[N+](=O)[O-]	1.60218	7.60145	22.6527	96.9317	216.755	c1c[nH]cn1	Imi
O=[N+]([O-])OCCc1ncn(CO[N+](=O)[O-])c1CO[N+](=O)[O-]	1.62803	7.60125	23.0368	75.4737	177.095	c1c[nH]cn1	Imi
COc1nn(CO[N+](=O)[O-])c(N(C)[N+](=O)[O-])c1[N+](=O)[O-]	1.64391	7.60101	25.6808	100.817	180.125	c1cn[nH]c1	Pyr
CN(c1nc(CCO[N+](=O)[O-])cn1CO[N+](=O)[O-])[N+](=O)[O-]	1.60317	7.60091	22.8291	83.4483	179.306	c1c[nH]cn1	Imi
Cc1cnc(N(CCO[N+](=O)[O-])[N+](=O)[O-])n1CO[N+](=O)[O-]	1.5943	7.60084	23.5995	87.4514	185.549	c1c[nH]cn1	Imi
O=[N+]([O-])OCCn1nccc1[N+](=O)[O-]	1.60884	7.60077	22.5882	80.5835	214.065	c1cn[nH]c1	Pyr
Cc1c([N+](=O)[O-])ncn1CO[N+](=O)[O-]	1.60361	7.60022	22.6223	97.8713	216.937	c1c[nH]cn1	Imi
O=[N+]([O-])OCCc1c(CO[N+](=O)[O-])nn(CCO[N+](=O)[O-])c1N(CCO[N+](=O)[O-])[N+](=O)[O-]	1.67204	7.59959	24.731	86.5887	170.206	c1cn[nH]c1	Pyr
Cc1nc(N(CCO[N+](=O)[O-])[N+](=O)[O-])n(CCO[N+](=O)[O-])c1N(CCO[N+](=O)[O-])[N+](=O)[O-]	1.63833	7.59936	24.8717	103.602	190.622	c1c[nH]cn1	Imi
Cc1nn(CO[N+](=O)[O-])c(N(C)[N+](=O)[O-])c1CO[N+](=O)[O-]	1.59133	7.59906	23.5788	94.1116	189.128	c1cn[nH]c1	Pyr
O=[N+]([O-])OCCn1c(CO[N+](=O)[O-])cnc1CO[N+](=O)[O-]	1.62727	7.59776	22.8986	76.5489	176.086	c1c[nH]cn1	Imi
Cc1c([N+](=O)[O-])nn(CCO[N+](=O)[O-])c1N(CCO[N+](=O)[O-])[N+](=O)[O-]	1.62828	7.5966	24.5596	109.693	204.719	c1cn[nH]c1	Pyr
O=[N+]([O-])OCCN(c1ccnn1CCO[N+](=O)[O-])[N+](=O)[O-]	1.61097	7.59625	23.1689	78.3546	177.118	c1cn[nH]c1	Pyr
Cc1c(CO[N+](=O)[O-])c(N(C)[N+](=O)[O-])nn1CO[N+](=O)[O-]	1.59363	7.5962	23.3106	91.7286	180.485	c1cn[nH]c1	Pyr
Cc1c(CCO[N+](=O)[O-])nn(CO[N+](=O)[O-])c1[N+](=O)[O-]	1.60825	7.59601	22.8783	90.8464	198.018	c1cn[nH]c1	Pyr
O=[N+]([O-])OCCc1nc(CCO[N+](=O)[O-])n(CO[N+](=O)[O-])c1N(CCO[N+](=O)[O-])[N+](=O)[O-]	1.66834	7.59557	24.6536	105.107	192.797	c1c[nH]cn1	Imi
CN(c1nn(CCO[N+](=O)[O-])nc1CCO[N+](=O)[O-])[N+](=O)[O-]	1.59523	7.59525	22.6282	73.8975	167.79	c1cn[nH]n1	Tra-2
Cc1cc([N+](=O)[O-])n(CO[N+](=O)[O-])n1	1.58933	7.59487	23.2507	87.2567	216.513	c1cn[nH]c1	Pyr
Cc1nn(CCO[N+](=O)[O-])c([N+](=O)[O-])c1CO[N+](=O)[O-]	1.60778	7.59455	22.7735	93.4116	197.658	c1cn[nH]c1	Pyr
Cc1c(N(C)[N+](=O)[O-])c(N(C)[N+](=O)[O-])nn1CO[N+](=O)[O-]	1.58121	7.59445	23.1132	114.1	194.757	c1cn[nH]c1	Pyr
Cn1cnc(N(CCO[N+](=O)[O-])[N+](=O)[O-])c1CO[N+](=O)[O-]	1.59996	7.59421	23.1172	80.2099	179.124	c1c[nH]cn1	Imi
O=[N+]([O-])OCCc1nn(CCO[N+](=O)[O-])nc1CO[N+](=O)[O-]	1.62185	7.59419	22.7105	68.0481	165.226	c1cn[nH]n1	Tra-2
Cn1nc(N(CCO[N+](=O)[O-])[N+](=O)[O-])cc1CO[N+](=O)[O-]	1.5949	7.59399	23.1124	87.9806	185.252	c1cn[nH]c1	Pyr
COc1c([N+](=O)[O-])c([N+](=O)[O-])nn1CCO[N+](=O)[O-]	1.66719	7.59396	25.1467	96.1836	198.435	c1cn[nH]c1	Pyr
Cn1c(N(CCO[N+](=O)[O-])[N+](=O)[O-])cnc1CO[N+](=O)[O-]	1.60525	7.59307	23.1421	80.8431	179.297	c1c[nH]cn1	Imi
O=[N+]([O-])OCCc1c(CO[N+](=O)[O-])ncn1CO[N+](=O)[O-]	1.62752	7.59215	22.9951	79.2448	179.914	c1c[nH]cn1	Imi
Cc1c(N(CCO[N+](=O)[O-])[N+](=O)[O-])nn(CCO[N+](=O)[O-])c1N(CCO[N+](=O)[O-])[N+](=O)[O-]	1.63748	7.59199	24.8027	110.005	195.482	c1cn[nH]c1	Pyr
Cc1nn(CCO[N+](=O)[O-])c(N(CCO[N+](=O)[O-])[N+](=O)[O-])c1N(CCO[N+](=O)[O-])[N+](=O)[O-]	1.63493	7.59156	24.7812	117.515	203.491	c1cn[nH]c1	Pyr
Cn1ncc(CO[N+](=O)[O-])c1N(CCO[N+](=O)[O-])[N+](=O)[O-]	1.59365	7.59141	23.2424	89.3096	187.856	c1cn[nH]c1	Pyr
O=[N+]([O-])OCCc1c(CO[N+](=O)[O-])nnn1CCO[N+](=O)[O-]	1.61982	7.59114	22.4759	74.5459	176.009	c1c[nH]nn1	Tra-1
Cc1nc(CO[N+](=O)[O-])c(CO[N+](=O)[O-])n1CO[N+](=O)[O-]	1.6142	7.59094	23.4572	84.9917	179.326	c1c[nH]cn1	Imi
CN(c1c(CO[N+](=O)[O-])ncn1CCO[N+](=O)[O-])[N+](=O)[O-]	1.60521	7.59087	22.7882	81.7194	178.248	c1c[nH]cn1	Imi
Cc1nc(CO[N+](=O)[O-])no1	1.58128	7.59059	22.2079	52.7945	188.537	c1ncon1	Oxa-3
CN(c1c(N(CCO[N+](=O)[O-])[N+](=O)[O-])cnn1C)[N+](=O)[O-]	1.58889	7.5905	23.1117	103.291	191.89	c1cn[nH]c1	Pyr
CN(c1c(CO[N+](=O)[O-])c(CO[N+](=O)[O-])nn1C)[N+](=O)[O-]	1.58792	7.59032	23.0038	96.8311	184.598	c1cn[nH]c1	Pyr
COc1nc(CO[N+](=O)[O-])n(CO[N+](=O)[O-])n1	1.61443	7.59002	24.7593	75.65	156.772	c1nc[nH]n1	Tra-4
Cn1c(CO[N+](=O)[O-])nc(CO[N+](=O)[O-])c1CO[N+](=O)[O-]	1.61607	7.58997	23.3203	83.6918	172.219	c1c[nH]cn1	Imi
CN(c1nc(N(C)[N+](=O)[O-])n(CCO[N+](=O)[O-])c1CO[N+](=O)[O-])[N+](=O)[O-]	1.61921	7.58983	24.5978	128.585	192.492	c1c[nH]cn1	Imi
Cn1nc(CO[N+](=O)[O-])c(CO[N+](=O)[O-])c1CO[N+](=O)[O-]	1.61635	7.58974	23.5438	83.3104	172.982	c1cn[nH]c1	Pyr
Cc1cc(N(CCO[N+](=O)[O-])[N+](=O)[O-])n(CO[N+](=O)[O-])n1	1.59555	7.58974	23.5392	89.3506	188.53	c1cn[nH]c1	Pyr
Cn1cc(CO[N+](=O)[O-])c(N(CCO[N+](=O)[O-])[N+](=O)[O-])n1	1.59775	7.58966	23.3332	82.2644	181.141	c1cn[nH]c1	Pyr
Cn1cc(CO[N+](=O)[O-])nc1[N+](=O)[O-]	1.60518	7.58915	22.6476	96.7143	217.478	c1c[nH]cn1	Imi
CN(c1nnn(C)c1N(C)[N+](=O)[O-])[N+](=O)[O-]	1.5504	7.58914	22.7539	113.618	176.555	c1c[nH]nn1	Tra-1
Cn1ncc(CO[N+](=O)[O-])c1[N+](=O)[O-]	1.61275	7.58894	23.2714	87.3886	214.559	c1cn[nH]c1	Pyr
O=[N+]([O-])OCCn1cncc1[N+](=O)[O-]	1.60712	7.58834	22.3642	82.2301	215.375	c1c[nH]cn1	Imi
COc1nnn(CO[N+](=O)[O-])c1CO[N+](=O)[O-]	1.61558	7.58812	24.7414	79.5765	160.28	c1c[nH]nn1	Tra-1
CN(c1nn(C)nc1N(C)[N+](=O)[O-])[N+](=O)[O-]	1.54441	7.58721	22.5635	116.578	169.595	c1cn[nH]n1	Tra-2
Cc1nnc(CO[N+](=O)[O-])o1	1.58268	7.58673	22.0012	67.0485	198.651	c1nnco1	Oxa-2
O=[N+]([O-])OCCc1nn(CCO[N+](=O)[O-])c(N(CCO[N+](=O)[O-])[N+](=O)[O-])c1CO[N+](=O)[O-]	1.66981	7.58662	24.5894	110.627	197.516	c1cn[nH]c1	Pyr
COc1nc([N+](=O)[O-])n(CO[N+](=O)[O-])c1N(C)[N+](=O)[O-]	1.63766	7.58658	25.7454	104.185	177.661	c1c[nH]cn1	Imi
COc1nnc(CO[N+](=O)[O-])n1CO[N+](=O)[O-]	1.61861	7.58642	24.6626	68.8585	157.076	c1nnc[nH]1	Tra-3
CN(c1c([N+](=O)[O-])nc(CCO[N+](=O)[O-])n1CCO[N+](=O)[O-])[N+](=O)[O-]	1.63179	7.5864	24.0629	105.228	187.431	c1c[nH]cn1	Imi
CN(c1nccn1CO[N+](=O)[O-])[N+](=O)[O-]	1.59039	7.58597	23.5971	78.04	189.677	c1c[nH]cn1	Imi
O=[N+]([O-])OCCc1nn(CO[N+](=O)[O-])cc1CO[N+](=O)[O-]	1.63021	7.58594	23.2577	77.2673	178.031	c1cn[nH]c1	Pyr
Cc1c(CO[N+](=O)[O-])nc(CO[N+](=O)[O-])n1CO[N+](=O)[O-]	1.61789	7.58593	23.6047	82.9472	170.797	c1c[nH]cn1	Imi
CN(c1cc(N(CCO[N+](=O)[O-])[N+](=O)[O-])nn1C)[N+](=O)[O-]	1.58504	7.5857	22.9516	106.95	192.434	c1cn[nH]c1	Pyr
O=[N+]([O-])OCCn1ccc([N+](=O)[O-])n1	1.60194	7.58546	22.1973	81.2095	211.929	c1cn[nH]c1	Pyr
Cn1c(CO[N+](=O)[O-])cnc1[N+](=O)[O-]	1.6184	7.58451	22.9873	97.2963	220.725	c1c[nH]cn1	Imi
CN(c1nn(CCO[N+](=O)[O-])cc1CO[N+](=O)[O-])[N+](=O)[O-]	1.60136	7.58349	22.7576	84.4826	180.205	c1cn[nH]c1	Pyr
Cn1cc([N+](=O)[O-])nc1CO[N+](=O)[O-]	1.60141	7.58339	22.5623	96.5953	216.1	c1c[nH]cn1	Imi
Cc1cn(CO[N+](=O)[O-])c([N+](=O)[O-])n1	1.59229	7.58336	23.2002	86.0408	214.541	c1c[nH]cn1	Imi
COc1nc([N+](=O)[O-])c([N+](=O)[O-])n1CCO[N+](=O)[O-]	1.65583	7.58298	24.9872	88.5022	196.733	c1c[nH]cn1	Imi
Cc1c(CCO[N+](=O)[O-])nc([N+](=O)[O-])n1CO[N+](=O)[O-]	1.60135	7.5829	22.5443	91.1313	199.262	c1c[nH]cn1	Imi
Cc1nn(CO[N+](=O)[O-])c(CO[N+](=O)[O-])c1N(C)[N+](=O)[O-]	1.58867	7.5829	23.3244	98.266	185.554	c1cn[nH]c1	Pyr
Cn1nc([N+](=O)[O-])cc1CO[N+](=O)[O-]	1.61104	7.58248	23.0423	90.5941	215.547	c1cn[nH]c1	Pyr
CN(c1nnn(CCO[N+](=O)[O-])c1CCO[N+](=O)[O-])[N+](=O)[O-]	1.58975	7.58241	22.3936	82.1986	174.951	c1c[nH]nn1	Tra-1
CN(c1cc(CCO[N+](=O)[O-])nn1CO[N+](=O)[O-])[N+](=O)[O-]	1.60788	7.58239	23.196	81.3849	179.177	c1cn[nH]c1	Pyr
Cc1c(N(C)[N+](=O)[O-])c(CO[N+](=O)[O-])nn1CO[N+](=O)[O-]	1.59159	7.58189	23.2393	94.5738	179.472	c1cn[nH]c1	Pyr
Cn1cnc(CO[N+](=O)[O-])c1[N+](=O)[O-]	1.59977	7.58178	22.843	87.5915	213.618	c1c[nH]cn1	Imi
Cc1cnc([N+](=O)[O-])n1CO[N+](=O)[O-]	1.59431	7.58165	23.2484	86.884	213.83	c1c[nH]cn1	Imi
COc1c(N(C)[N+](=O)[O-])nnn1CO[N+](=O)[O-]	1.59082	7.58129	23.5542	80.8487	173.716	c1c[nH]nn1	Tra-1
Cc1ncc([N+](=O)[O-])n1CO[N+](=O)[O-]	1.59341	7.58117	23.1055	86.6348	215.367	c1c[nH]cn1	Imi
COc1c([N+](=O)[O-])nc(N(C)[N+](=O)[O-])n1CO[N+](=O)[O-]	1.63907	7.58102	25.5735	105.939	175.034	c1c[nH]cn1	Imi
O=[N+]([O-])OCCc1cc(CO[N+](=O)[O-])nn1CO[N+](=O)[O-]	1.63141	7.58058	23.2266	74.362	175.021	c1cn[nH]c1	Pyr
Cc1nc(CCO[N+](=O)[O-])c([N+](=O)[O-])n1CO[N+](=O)[O-]	1.60686	7.58056	22.7745	93.3925	198.41	c1c[nH]cn1	Imi
COc1c([N+](=O)[O-])nc([N+](=O)[O-])n1CCO[N+](=O)[O-]	1.65949	7.58034	25.2005	97.3159	199.099	c1c[nH]cn1	Imi
Cc1nc(N(CCO[N+](=O)[O-])[N+](=O)[O-])cn1CO[N+](=O)[O-]	1.6039	7.57994	23.251	80.3539	178.744	c1c[nH]cn1	Imi
Cc1c([N+](=O)[O-])c(CCO[N+](=O)[O-])nn1CO[N+](=O)[O-]	1.60973	7.57952	22.6878	91.4381	195.417	c1cn[nH]c1	Pyr
O=[N+]([O-])OCCc1cnc(CO[N+](=O)[O-])n1CO[N+](=O)[O-]	1.63378	7.57945	23.2522	70.4141	171.8	c1c[nH]cn1	Imi
O=[N+]([O-])OCCc1nc(N(CCO[N+](=O)[O-])[N+](=O)[O-])n(CO[N+](=O)[O-])c1CCO[N+](=O)[O-]	1.67084	7.57936	24.4615	99.5956	182.163	c1c[nH]cn1	Imi
O=[N+]([O-])OCCn1cnc([N+](=O)[O-])c1	1.60026	7.57813	21.9163	85.8815	212.624	c1c[nH]cn1	Imi
COc1nc(N(C)[N+](=O)[O-])n(CO[N+](=O)[O-])c1[N+](=O)[O-]	1.63676	7.57703	25.7866	111.363	175.457	c1c[nH]cn1	Imi
O=[N+]([O-])OCCn1cnc(CO[N+](=O)[O-])c1CO[N+](=O)[O-]	1.62503	7.57657	22.8674	78.6218	179.724	c1c[nH]cn1	Imi
O=[N+]([O-])OCCc1nonc1CCO[N+](=O)[O-]	1.60996	7.57559	21.5413	56.1108	177.773	c1cnon1	Oxa-1
O=[N+]([O-])OCCN(c1cnn(CCO[N+](=O)[O-])c1)[N+](=O)[O-]	1.61867	7.57509	22.8913	73.7552	176.344	c1cn[nH]c1	Pyr
CN(c1cn(CCO[N+](=O)[O-])nc1N(C)[N+](=O)[O-])[N+](=O)[O-]	1.58948	7.575	22.7069	105.801	191.714	c1cn[nH]c1	Pyr
CN(c1nc(CCO[N+](=O)[O-])n(CCO[N+](=O)[O-])c1N(CCO[N+](=O)[O-])[N+](=O)[O-])[N+](=O)[O-]	1.63342	7.57484	24.6385	123.765	212.008	c1c[nH]cn1	Imi
Cc1c(CCO[N+](=O)[O-])c([N+](=O)[O-])nn1CO[N+](=O)[O-]	1.60733	7.57405	22.7071	90.661	197.387	c1cn[nH]c1	Pyr
COc1nn(CO[N+](=O)[O-])nc1N(C)[N+](=O)[O-]	1.59379	7.57402	23.915	77.3959	171.068	c1cn[nH]n1	Tra-2
O=[N+]([O-])OCCc1cnon1	1.5884	7.57399	21.4505	55.2884	188.372	c1cnon1	Oxa-1
CN(c1ncc(N(CCO[N+](=O)[O-])[N+](=O)[O-])n1C)[N+](=O)[O-]	1.58512	7.57348	22.9387	107.258	193.351	c1c[nH]cn1	Imi
Cn1nc(CO[N+](=O)[O-])c([N+](=O)[O-])c1CCO[N+](=O)[O-]	1.60603	7.57326	22.4659	95.2291	195.482	c1cn[nH]c1	Pyr
CN(c1nc(CO[N+](=O)[O-])cn1CCO[N+](=O)[O-])[N+](=O)[O-]	1.59849	7.57317	22.5821	86.9707	181.51	c1c[nH]cn1	Imi
CN(c1cnc(CCO[N+](=O)[O-])n1CO[N+](=O)[O-])[N+](=O)[O-]	1.60944	7.57298	23.1217	79.8953	178.166	c1c[nH]cn1	Imi
Cc1c(N(C)[N+](=O)[O-])nc(CO[N+](=O)[O-])n1CO[N+](=O)[O-]	1.58709	7.5727	23.0595	98.5278	185.45	c1c[nH]cn1	Imi
O=[N+]([O-])OCCN(c1cn(CCO[N+](=O)[O-])cn1)[N+](=O)[O-]	1.60515	7.57257	22.6616	82.4619	179.126	c1c[nH]cn1	Imi
Cn1nc(CCO[N+](=O)[O-])c([N+](=O)[O-])c1CO[N+](=O)[O-]	1.61101	7.57197	22.6655	92.7261	194.321	c1cn[nH]c1	Pyr
COc1c(N(CCO[N+](=O)[O-])[N+](=O)[O-])nn(CO[N+](=O)[O-])c1CO[N+](=O)[O-]	1.6396	7.57162	25.0235	86.7867	163.483	c1cn[nH]c1	Pyr
CN(c1nn(CO[N+](=O)[O-])cc1CCO[N+](=O)[O-])[N+](=O)[O-]	1.60396	7.5714	23.0301	83.9737	181.123	c1cn[nH]c1	Pyr
Cc1c(N(C)[N+](=O)[O-])nn(CO[N+](=O)[O-])c1N(C)[N+](=O)[O-]	1.57907	7.57104	23.1402	117.222	188.232	c1cn[nH]c1	Pyr
CN(c1c(CO[N+](=O)[O-])nc(CO[N+](=O)[O-])n1C)[N+](=O)[O-]	1.59042	7.57099	22.9938	93.9137	179.541	c1c[nH]cn1	Imi
COc1c(N(CCO[N+](=O)[O-])[N+](=O)[O-])c(N(CCO[N+](=O)[O-])[N+](=O)[O-])nn1CO[N+](=O)[O-]	1.6563	7.57093	26.5223	116.394	175.881	c1cn[nH]c1	Pyr
Cn1cc(CO[N+](=O)[O-])c([N+](=O)[O-])n1	1.59689	7.57031	22.8794	84.9276	211.813	c1cn[nH]c1	Pyr
O=[N+]([O-])OCCn1ccnc1[N+](=O)[O-]	1.59561	7.56985	22.2565	78.6511	214.493	c1c[nH]cn1	Imi
O=[N+]([O-])OCCc1nnc(CO[N+](=O)[O-])n1CCO[N+](=O)[O-]	1.61867	7.56979	22.4667	71.1535	169.911	c1nnc[nH]1	Tra-3
CN(c1cnc(CO[N+](=O)[O-])n1CCO[N+](=O)[O-])[N+](=O)[O-]	1.5953	7.56963	22.6241	94.295	188.253	c1c[nH]cn1	Imi
Cc1nc(CO[N+](=O)[O-])c([N+](=O)[O-])n1CCO[N+](=O)[O-]	1.60439	7.5694	22.5349	94.6688	198.14	c1c[nH]cn1	Imi
Cc1c(CCO[N+](=O)[O-])nn(CO[N+](=O)[O-])c1N(CCO[N+](=O)[O-])[N+](=O)[O-]	1.60556	7.5689	23.2139	88.718	183.664	c1cn[nH]c1	Pyr
Cc1c(N(CCO[N+](=O)[O-])[N+](=O)[O-])nn(C)c1N(CCO[N+](=O)[O-])[N+](=O)[O-]	1.57888	7.56816	22.9262	109.92	200.368	c1cn[nH]c1	Pyr
CN(c1cn(CO[N+](=O)[O-])c(CCO[N+](=O)[O-])n1)[N+](=O)[O-]	1.59831	7.5681	22.7542	89.0989	184.576	c1c[nH]cn1	Imi
CN(c1cnn(CCO[N+](=O)[O-])c1N(C)[N+](=O)[O-])[N+](=O)[O-]	1.58572	7.5681	22.6748	107.873	192.161	c1cn[nH]c1	Pyr
Cn1c([N+](=O)[O-])nc(N(CCO[N+](=O)[O-])[N+](=O)[O-])c1CCO[N+](=O)[O-]	1.61854	7.56793	24.6919	115.248	219.132	c1c[nH]cn1	Imi
O=[N+]([O-])OCCc1conn1	1.58798	7.56756	21.393	57.7415	191.251	c1conn1	Oxa-4
O=[N+]([O-])OCCc1c(N(CCO[N+](=O)[O-])[N+](=O)[O-])nn(CCO[N+](=O)[O-])c1CO[N+](=O)[O-]	1.67128	7.56723	24.5277	91.6998	170.639	c1cn[nH]c1	Pyr
Cc1nc(N(C)[N+](=O)[O-])n(CO[N+](=O)[O-])c1CO[N+](=O)[O-]	1.59104	7.56713	23.4294	94.6322	178.74	c1c[nH]cn1	Imi
CN(c1cn(CCO[N+](=O)[O-])nc1CO[N+](=O)[O-])[N+](=O)[O-]	1.60572	7.56698	22.8671	81.9883	178.151	c1cn[nH]c1	Pyr
O=[N+]([O-])OCCc1nc(N(CCO[N+](=O)[O-])[N+](=O)[O-])c(CCO[N+](=O)[O-])n1CO[N+](=O)[O-]	1.66966	7.56594	24.4289	94.2075	176.721	c1c[nH]cn1	Imi
O=[N+]([O-])OCCn1nc(CO[N+](=O)[O-])cc1CO[N+](=O)[O-]	1.62972	7.56552	23.1971	76.107	176.398	c1cn[nH]c1	Pyr
COc1nc(N(C)[N+](=O)[O-])nn1CO[N+](=O)[O-]	1.59801	7.56551	23.9106	72.7509	167.521	c1nc[nH]n1	Tra-4
O=[N+]([O-])OCCc1cnno1	1.5889	7.56515	21.4014	56.1159	190.586	c1conn1	Oxa-4
CN(c1c(CO[N+](=O)[O-])nn(C)c1N(C)[N+](=O)[O-])[N+](=O)[O-]	1.57548	7.56493	22.8247	116.299	194.232	c1cn[nH]c1	Pyr
Cc1nn(CO[N+](=O)[O-])c(N(C)[N+](=O)[O-])c1N(C)[N+](=O)[O-]	1.57319	7.56473	23.165	121.811	201.114	c1cn[nH]c1	Pyr
Cc1c(N(CCO[N+](=O)[O-])[N+](=O)[O-])nc(N(CCO[N+](=O)[O-])[N+](=O)[O-])n1CCO[N+](=O)[O-]	1.63141	7.56278	25.0519	124.999	213.695	c1c[nH]cn1	Imi
O=[N+]([O-])OCCc1ncno1	1.59201	7.56264	21.3479	64.3737	194.399	c1ncon1	Oxa-3
O=[N+]([O-])OCCc1cnn(CCO[N+](=O)[O-])c1[N+](=O)[O-]	1.60773	7.56216	22.2999	84.8	199.668	c1cn[nH]c1	Pyr
CN(c1c(N(CCO[N+](=O)[O-])[N+](=O)[O-])ncn1C)[N+](=O)[O-]	1.58563	7.56213	23.0968	103.251	191.781	c1c[nH]cn1	Imi
CN(c1nc([N+](=O)[O-])c(CCO[N+](=O)[O-])n1CCO[N+](=O)[O-])[N+](=O)[O-]	1.6278	7.56167	24.1548	113.459	202.907	c1c[nH]cn1	Imi
Cc1cnn(CO[N+](=O)[O-])c1N(CCO[N+](=O)[O-])[N+](=O)[O-]	1.5992	7.55983	23.9587	84.6211	189.2	c1cn[nH]c1	Pyr
Cn1nc(CO[N+](=O)[O-])cc1N(CCO[N+](=O)[O-])[N+](=O)[O-]	1.60106	7.55864	23.2719	84.0121	181.03	c1cn[nH]c1	Pyr
O=[N+]([O-])OCCc1ncn(CCO[N+](=O)[O-])c1[N+](=O)[O-]	1.61174	7.55856	22.1941	86.5487	196.296	c1c[nH]cn1	Imi
Cc1c(N(CCO[N+](=O)[O-])[N+](=O)[O-])c(N(CCO[N+](=O)[O-])[N+](=O)[O-])nn1CCO[N+](=O)[O-]	1.63485	7.5584	24.6068	111.888	195.229	c1cn[nH]c1	Pyr
Cn1c(CO[N+](=O)[O-])nc(CCO[N+](=O)[O-])c1[N+](=O)[O-]	1.60784	7.55836	22.5194	91.9168	197.296	c1c[nH]cn1	Imi
Cc1c(CO[N+](=O)[O-])nn(CCO[N+](=O)[O-])c1[N+](=O)[O-]	1.60503	7.55829	22.7793	90.215	198.722	c1cn[nH]c1	Pyr
CN(c1nc(CO[N+](=O)[O-])c(N(C)[N+](=O)[O-])n1C)[N+](=O)[O-]	1.57772	7.55802	22.7944	115.517	191.718	c1c[nH]cn1	Imi
CN(c1c([N+](=O)[O-])c(CCO[N+](=O)[O-])nn1C)[N+](=O)[O-]	1.58238	7.55799	22.0502	107.989	199.349	c1cn[nH]c1	Pyr
Cc1c(CO[N+](=O)[O-])nc([N+](=O)[O-])n1CCO[N+](=O)[O-]	1.60332	7.5579	22.5253	90.124	198.314	c1c[nH]cn1	Imi
O=[N+]([O-])OCCc1nc(CO[N+](=O)[O-])n(CCO[N+](=O)[O-])c1N(CCO[N+](=O)[O-])[N+](=O)[O-]	1.67044	7.55789	24.5047	90.4001	172.441	c1c[nH]cn1	Imi
Cc1nn(CO[N+](=O)[O-])cc1N(CCO[N+](=O)[O-])[N+](=O)[O-]	1.59385	7.55699	23.3122	95.5064	193.942	c1cn[nH]c1	Pyr
Cn1cc([N+](=O)[O-])c(CO[N+](=O)[O-])n1	1.59108	7.5569	22.8621	81.599	211.452	c1cn[nH]c1	Pyr
Cc1cn(CO[N+](=O)[O-])nc1N(CCO[N+](=O)[O-])[N+](=O)[O-]	1.59759	7.55683	23.5404	87.7973	184.585	c1cn[nH]c1	Pyr
CN(c1ncn(CCO[N+](=O)[O-])c1CO[N+](=O)[O-])[N+](=O)[O-]	1.6012	7.55663	22.7301	83.9237	180.656	c1c[nH]cn1	Imi
Cc1nc(N(CCO[N+](=O)[O-])[N+](=O)[O-])n(CO[N+](=O)[O-])c1CCO[N+](=O)[O-]	1.60793	7.55653	23.05	83.4268	176.528	c1c[nH]cn1	Imi
O=[N+]([O-])OCCc1nn(CO[N+](=O)[O-])c(CCO[N+](=O)[O-])c1CO[N+](=O)[O-]	1.64143	7.55619	22.6315	80.8567	166.41	c1cn[nH]c1	Pyr
CN(c1ncn(CCO[N+](=O)[O-])c1N(C)[N+](=O)[O-])[N+](=O)[O-]	1.58687	7.55551	22.6887	106.113	192.411	c1c[nH]cn1	Imi
O=[N+]([O-])OCCc1nc(CO[N+](=O)[O-])cn1CO[N+](=O)[O-]	1.62943	7.55505	23.144	75.5849	176.568	c1c[nH]cn1	Imi
O=[N+]([O-])OCCc1ncon1	1.6019	7.55491	21.6699	56.8492	195.755	c1ncon1	Oxa-3
O=[N+]([O-])OCCc1cc([N+](=O)[O-])n(CCO[N+](=O)[O-])n1	1.61786	7.55486	22.3696	81.9049	198.343	c1cn[nH]c1	Pyr
Cn1ncc([N+](=O)[O-])c1CO[N+](=O)[O-]	1.58412	7.55438	22.6156	84.6791	215.615	c1cn[nH]c1	Pyr
CN(c1cnn(CO[N+](=O)[O-])c1CCO[N+](=O)[O-])[N+](=O)[O-]	1.59602	7.55421	22.844	96.894	191.879	c1cn[nH]c1	Pyr
O=[N+]([O-])OCCc1nnco1	1.58736	7.55377	21.2976	61.8123	196.92	c1nnco1	Oxa-2
CN(c1nc(CO[N+](=O)[O-])n(C)c1CO[N+](=O)[O-])[N+](=O)[O-]	1.59055	7.55374	23.0269	93.1706	179.687	c1c[nH]cn1	Imi
O=[N+]([O-])OCCc1noc(CCO[N+](=O)[O-])n1	1.61248	7.55368	21.5461	52.5757	177.332	c1ncon1	Oxa-3
Cc1c([N+](=O)[O-])nn(CO[N+](=O)[O-])c1CCO[N+](=O)[O-]	1.60573	7.5536	22.861	89.0464	196.203	c1cn[nH]c1	Pyr
CN(c1ncc(CCO[N+](=O)[O-])n1CO[N+](=O)[O-])[N+](=O)[O-]	1.59845	7.5536	23.0581	88.6831	188.347	c1c[nH]cn1	Imi
Cn1cc(CO[N+](=O)[O-])nc1N(CCO[N+](=O)[O-])[N+](=O)[O-]	1.59991	7.55211	23.2833	82.4222	179.543	c1c[nH]cn1	Imi
O=[N+]([O-])OCCc1nc(CO[N+](=O)[O-])c(N(CCO[N+](=O)[O-])[N+](=O)[O-])n1CCO[N+](=O)[O-]	1.66934	7.55179	24.4749	96.0692	177.573	c1c[nH]cn1	Imi
COc1nc(N(C)[N+](=O)[O-])n(CO[N+](=O)[O-])n1	1.59302	7.55166	24.1657	73.6126	161.818	c1nc[nH]n1	Tra-4
CN(c1nn(C)cc1N(CCO[N+](=O)[O-])[N+](=O)[O-])[N+](=O)[O-]	1.5815	7.55083	23.0545	106.246	192.329	c1cn[nH]c1	Pyr
Cc1nc(CCO[N+](=O)[O-])n(CO[N+](=O)[O-])c1[N+](=O)[O-]	1.60501	7.5507	22.8266	89.6822	197.76	c1c[nH]cn1	Imi
O=[N+]([O-])OCCc1cn(CCO[N+](=O)[O-])nc1[N+](=O)[O-]	1.60456	7.55019	21.8916	84.9165	196.583	c1cn[nH]c1	Pyr
Cc1nc(N(C)[N+](=O)[O-])c(CO[N+](=O)[O-])n1CO[N+](=O)[O-]	1.59006	7.54912	23.3195	94.4905	177.938	c1c[nH]cn1	Imi
COc1nc(N(CCO[N+](=O)[O-])[N+](=O)[O-])c(CO[N+](=O)[O-])n1CO[N+](=O)[O-]	1.64392	7.54899	25.1761	83.0907	158.366	c1c[nH]cn1	Imi
Cc1nc([N+](=O)[O-])n(CO[N+](=O)[O-])c1CCO[N+](=O)[O-]	1.60235	7.54889	22.8704	88.6469	197.752	c1c[nH]cn1	Imi
COc1nn(CO[N+](=O)[O-])c(CO[N+](=O)[O-])c1N(CCO[N+](=O)[O-])[N+](=O)[O-]	1.64144	7.54852	25.2452	88.052	164.837	c1cn[nH]c1	Pyr
CN(c1nn(C)c(CO[N+](=O)[O-])c1N(C)[N+](=O)[O-])[N+](=O)[O-]	1.57786	7.54808	22.9817	114.083	195.173	c1cn[nH]c1	Pyr
O=[N+]([O-])OCCc1cn(CCO[N+](=O)[O-])c([N+](=O)[O-])n1	1.60719	7.54802	21.8598	83.3279	197.045	c1c[nH]cn1	Imi
Cc1c(CO[N+](=O)[O-])c([N+](=O)[O-])nn1CCO[N+](=O)[O-]	1.60127	7.54795	22.5407	89.0523	196.887	c1cn[nH]c1	Pyr
CN(c1cnn(CCO[N+](=O)[O-])c1CO[N+](=O)[O-])[N+](=O)[O-]	1.59865	7.54782	22.8853	89.1402	186.789	c1cn[nH]c1	Pyr
CN(c1nn(C)c(CO[N+](=O)[O-])c1CO[N+](=O)[O-])[N+](=O)[O-]	1.58607	7.54765	23.0324	100.136	182.432	c1cn[nH]c1	Pyr
O=[N+]([O-])OCCc1nn(CCO[N+](=O)[O-])cc1[N+](=O)[O-]	1.61792	7.54698	22.1415	83.7904	195.846	c1cn[nH]c1	Pyr
CN(c1nc(CO[N+](=O)[O-])c(CO[N+](=O)[O-])n1C)[N+](=O)[O-]	1.58418	7.54642	22.8423	103.079	185.542	c1c[nH]cn1	Imi
Cn1cnc([N+](=O)[O-])c1CO[N+](=O)[O-]	1.59054	7.54606	22.7947	85.2013	212.758	c1c[nH]cn1	Imi
Cn1c(CCO[N+](=O)[O-])nc(CO[N+](=O)[O-])c1[N+](=O)[O-]	1.60436	7.54507	22.4912	90.468	197.137	c1c[nH]cn1	Imi
O=[N+]([O-])OCCc1c(CO[N+](=O)[O-])c(CO[N+](=O)[O-])nn1CCO[N+](=O)[O-]	1.64026	7.54485	22.4631	79.872	164.091	c1cn[nH]c1	Pyr
O=[N+]([O-])OCCc1c(N(CCO[N+](=O)[O-])[N+](=O)[O-])c(CO[N+](=O)[O-])nn1CCO[N+](=O)[O-]	1.66939	7.54472	24.5487	95.9734	179.032	c1cn[nH]c1	Pyr
Cn1nc(CO[N+](=O)[O-])c(CCO[N+](=O)[O-])c1[N+](=O)[O-]	1.60322	7.54455	22.7829	88.5325	200.594	c1cn[nH]c1	Pyr
Cc1nn(CO[N+](=O)[O-])c(CCO[N+](=O)[O-])c1N(CCO[N+](=O)[O-])[N+](=O)[O-]	1.60674	7.54386	23.1504	87.4495	182.402	c1cn[nH]c1	Pyr
CN(c1cc(CO[N+](=O)[O-])n(CCO[N+](=O)[O-])n1)[N+](=O)[O-]	1.60053	7.54349	22.8848	87.7729	182.442	c1cn[nH]c1	Pyr
Cn1nc(CCO[N+](=O)[O-])c(CO[N+](=O)[O-])c1[N+](=O)[O-]	1.60421	7.54321	22.6529	89.8939	197.77	c1cn[nH]c1	Pyr
CN(c1nnc(CCO[N+](=O)[O-])n1CCO[N+](=O)[O-])[N+](=O)[O-]	1.59096	7.543	22.5378	79.5722	168.255	c1nnc[nH]1	Tra-3
Cc1nc(N(C)[N+](=O)[O-])c(N(C)[N+](=O)[O-])n1CO[N+](=O)[O-]	1.57249	7.54285	22.9495	119.96	197.607	c1c[nH]cn1	Imi
COc1nnn(CCO[N+](=O)[O-])c1[N+](=O)[O-]	1.61454	7.54254	23.1957	79.7046	190.292	c1c[nH]nn1	Tra-1
Cn1cnc(CO[N+](=O)[O-])c1N(CCO[N+](=O)[O-])[N+](=O)[O-]	1.59094	7.54147	22.9686	93.0471	189.434	c1c[nH]cn1	Imi
COc1nc(N(CCO[N+](=O)[O-])[N+](=O)[O-])n(CO[N+](=O)[O-])c1CO[N+](=O)[O-]	1.64287	7.54147	25.2926	86.8205	161.779	c1c[nH]cn1	Imi
CN(c1cnc([N+](=O)[O-])n1C)[N+](=O)[O-]	1.58386	7.54029	21.7779	112.699	214.444	c1c[nH]cn1	Imi
Cc1c(CO[N+](=O)[O-])c(N(CCO[N+](=O)[O-])[N+](=O)[O-])nn1CCO[N+](=O)[O-]	1.59937	7.53964	22.9987	91.7241	184.525	c1cn[nH]c1	Pyr
CN(c1nc(N(CCO[N+](=O)[O-])[N+](=O)[O-])n(CCO[N+](=O)[O-])c1CCO[N+](=O)[O-])[N+](=O)[O-]	1.63511	7.53956	24.6514	129.187	215.241	c1c[nH]cn1	Imi
O=[N+]([O-])OCCc1nc(N(CCO[N+](=O)[O-])[N+](=O)[O-])c(CO[N+](=O)[O-])n1CCO[N+](=O)[O-]	1.66692	7.53942	24.1117	102.752	183.772	c1c[nH]cn1	Imi
Cc1nn(CCO[N+](=O)[O-])c([N+](=O)[O-])c1N(C)[N+](=O)[O-]	1.57621	7.53919	22.2498	108.015	204.86	c1cn[nH]c1	Pyr
Cc1nnn(CCO[N+](=O)[O-])n1	1.51541	7.5381	19.3393	64.8344	180.876	c1nn[nH]n1	Tet-2
Cc1nc(N(CCO[N+](=O)[O-])[N+](=O)[O-])c(N(CCO[N+](=O)[O-])[N+](=O)[O-])n1CCO[N+](=O)[O-]	1.63475	7.53793	24.7247	110.91	192.82	c1c[nH]cn1	Imi
O=[N+]([O-])OCCc1nnc(CCO[N+](=O)[O-])o1	1.60946	7.53769	21.3935	59.2039	184.352	c1nnco1	Oxa-2
CN(c1ncc([N+](=O)[O-])n1C)[N+](=O)[O-]	1.58199	7.5376	21.8711	109.289	212.448	c1c[nH]cn1	Imi
COc1c(N(CCO[N+](=O)[O-])[N+](=O)[O-])nc(CO[N+](=O)[O-])n1CO[N+](=O)[O-]	1.64366	7.5373	25.1265	87.2263	159.19	c1c[nH]cn1	Imi
O=[N+]([O-])OCCc1c(N(CCO[N+](=O)[O-])[N+](=O)[O-])nc(CO[N+](=O)[O-])n1CCO[N+](=O)[O-]	1.66748	7.53729	24.324	102.56	183.22	c1c[nH]cn1	Imi
CN(c1nc(CO[N+](=O)[O-])n(C)c1N(C)[N+](=O)[O-])[N+](=O)[O-]	1.57621	7.53713	22.7347	115.841	191.019	c1c[nH]cn1	Imi
Cn1nc([N+](=O)[O-])c(CO[N+](=O)[O-])c1CCO[N+](=O)[O-]	1.59901	7.53696	22.3949	89.5746	197.901	c1cn[nH]c1	Pyr
O=[N+]([O-])OCCc1c(CO[N+](=O)[O-])c(N(CCO[N+](=O)[O-])[N+](=O)[O-])nn1CCO[N+](=O)[O-]	1.66952	7.53688	24.2985	104.121	181.317	c1cn[nH]c1	Pyr
COc1nc([N+](=O)[O-])n(CCO[N+](=O)[O-])n1	1.61582	7.53621	23.7024	68.754	179.284	c1nc[nH]n1	Tra-4
COc1nn(CO[N+](=O)[O-])c(N(CCO[N+](=O)[O-])[N+](=O)[O-])c1CO[N+](=O)[O-]	1.64318	7.53614	25.4702	93.9127	165.931	c1cn[nH]c1	Pyr
Cn1nc(CCO[N+](=O)[O-])c(N(CCO[N+](=O)[O-])[N+](=O)[O-])c1CO[N+](=O)[O-]	1.60467	7.53533	22.9841	85.1827	179.914	c1cn[nH]c1	Pyr
COc1c(CO[N+](=O)[O-])nc(N(CCO[N+](=O)[O-])[N+](=O)[O-])n1CO[N+](=O)[O-]	1.6425	7.53525	25.343	91.9635	164.059	c1c[nH]cn1	Imi
COc1c(CO[N+](=O)[O-])c(N(CCO[N+](=O)[O-])[N+](=O)[O-])nn1CO[N+](=O)[O-]	1.64461	7.53498	25.4283	88.742	159.931	c1cn[nH]c1	Pyr
COc1nc([N+](=O)[O-])c(N(C)[N+](=O)[O-])n1CO[N+](=O)[O-]	1.63184	7.53375	25.5244	107.975	184.227	c1c[nH]cn1	Imi
COc1nnn(CO[N+](=O)[O-])c1N(C)[N+](=O)[O-]	1.58401	7.53362	23.8754	88.7778	170.756	c1c[nH]nn1	Tra-1
O=[N+]([O-])OCCc1ncc(N(CCO[N+](=O)[O-])[N+](=O)[O-])n1CCO[N+](=O)[O-]	1.6199	7.53341	22.4844	81.3262	176.216	c1c[nH]cn1	Imi
Cn1c(CO[N+](=O)[O-])nc([N+](=O)[O-])c1CCO[N+](=O)[O-]	1.60468	7.53322	22.4074	90.5205	196.642	c1c[nH]cn1	Imi
Cc1nn(CCO[N+](=O)[O-])c(N(C)[N+](=O)[O-])c1N(CCO[N+](=O)[O-])[N+](=O)[O-]	1.58471	7.53236	23.1005	105.32	197.757	c1cn[nH]c1	Pyr
CN(c1cc(N(CCO[N+](=O)[O-])[N+](=O)[O-])n(C)n1)[N+](=O)[O-]	1.57294	7.53224	22.9606	120.883	205.791	c1cn[nH]c1	Pyr
CN(c1cnn(C)c1N(CCO[N+](=O)[O-])[N+](=O)[O-])[N+](=O)[O-]	1.57218	7.5309	23.2366	121.335	209.617	c1cn[nH]c1	Pyr
CN(c1cc([N+](=O)[O-])nn1C)[N+](=O)[O-]	1.57923	7.53074	21.835	109.566	211.132	c1cn[nH]c1	Pyr
COc1c(N(CCO[N+](=O)[O-])[N+](=O)[O-])c(N(C)[N+](=O)[O-])nn1CO[N+](=O)[O-]	1.61058	7.53063	24.8432	105.086	184.473	c1cn[nH]c1	Pyr
Cn1nc(CCO[N+](=O)[O-])c(CO[N+](=O)[O-])c1N(CCO[N+](=O)[O-])[N+](=O)[O-]	1.59971	7.53039	22.8528	103.422	195.185	c1cn[nH]c1	Pyr
Cc1c(N(CCO[N+](=O)[O-])[N+](=O)[O-])nn(C)c1[N+](=O)[O-]	1.5788	7.53011	22.3573	107.399	200.136	c1cn[nH]c1	Pyr
CN(c1cc([N+](=O)[O-])n(C)n1)[N+](=O)[O-]	1.58824	7.53009	22.1672	106.549	210.362	c1cn[nH]c1	Pyr
Cc1c(N(C)[N+](=O)[O-])nn(CCO[N+](=O)[O-])c1[N+](=O)[O-]	1.58783	7.53007	22.3936	104.935	198.877	c1cn[nH]c1	Pyr
Cc1c(N(CCO[N+](=O)[O-])[N+](=O)[O-])nn(CO[N+](=O)[O-])c1CCO[N+](=O)[O-]	1.61147	7.52976	23.0656	83.9549	175.479	c1cn[nH]c1	Pyr
Cc1nc([N+](=O)[O-])n(C)c1N(CCO[N+](=O)[O-])[N+](=O)[O-]	1.58667	7.52972	22.5026	103.746	201.222	c1c[nH]cn1	Imi
CN(c1cn(CO[N+](=O)[O-])nc1CCO[N+](=O)[O-])[N+](=O)[O-]	1.59664	7.52933	22.897	96.1196	187.755	c1cn[nH]c1	Pyr
COc1nn(CO[N+](=O)[O-])c(N(C)[N+](=O)[O-])c1N(CCO[N+](=O)[O-])[N+](=O)[O-]	1.61023	7.5291	24.9694	106.621	186.695	c1cn[nH]c1	Pyr
Cn1c(CCO[N+](=O)[O-])nc([N+](=O)[O-])c1CO[N+](=O)[O-]	1.60563	7.52865	22.479	89.3524	195.07	c1c[nH]cn1	Imi
CN(c1c(CCO[N+](=O)[O-])nn(C)c1N(CCO[N+](=O)[O-])[N+](=O)[O-])[N+](=O)[O-]	1.58203	7.52771	23.0009	107.851	201.193	c1cn[nH]c1	Pyr
COc1nn(CCO[N+](=O)[O-])nc1[N+](=O)[O-]	1.60756	7.5277	23.0053	77.4266	187.151	c1cn[nH]n1	Tra-2
Cn1nnc(CCO[N+](=O)[O-])n1	1.51583	7.52734	19.2196	65.1533	180.953	c1nn[nH]n1	Tet-2
Cc1nc(CO[N+](=O)[O-])n(CCO[N+](=O)[O-])c1[N+](=O)[O-]	1.60086	7.52727	22.6959	92.3201	201.188	c1c[nH]cn1	Imi
Cn1cc(N(CCO[N+](=O)[O-])[N+](=O)[O-])nc1CO[N+](=O)[O-]	1.5972	7.52704	23.1964	85.5315	180.869	c1c[nH]cn1	Imi
O=[N+]([O-])OCCn1cc(CO[N+](=O)[O-])nc1CO[N+](=O)[O-]	1.62375	7.52692	22.9521	84.7497	182.997	c1c[nH]cn1	Imi
CN(c1c(CCO[N+](=O)[O-])nn(CCO[N+](=O)[O-])c1N(CCO[N+](=O)[O-])[N+](=O)[O-])[N+](=O)[O-]	1.63757	7.52651	24.4344	126.706	205.519	c1cn[nH]c1	Pyr
Cc1nn(CCO[N+](=O)[O-])c(CO[N+](=O)[O-])c1[N+](=O)[O-]	1.60444	7.5264	22.6921	88.4866	195.708	c1cn[nH]c1	Pyr
Cc1c([N+](=O)[O-])nn(C)c1N(CCO[N+](=O)[O-])[N+](=O)[O-]	1.57505	7.52604	22.4023	109.031	207.706	c1cn[nH]c1	Pyr
Cc1c([N+](=O)[O-])c(N(C)[N+](=O)[O-])nn1CCO[N+](=O)[O-]	1.58332	7.52594	22.1598	105.235	199.021	c1cn[nH]c1	Pyr
Cc1nc([N+](=O)[O-])n(CCO[N+](=O)[O-])c1CO[N+](=O)[O-]	1.5984	7.52557	22.761	92.5745	199.353	c1c[nH]cn1	Imi
Cc1c(N(C)[N+](=O)[O-])nc(N(C)[N+](=O)[O-])n1CO[N+](=O)[O-]	1.57228	7.52473	22.8672	121.552	191.968	c1c[nH]cn1	Imi
CN(c1nn(C)c(CCO[N+](=O)[O-])c1[N+](=O)[O-])[N+](=O)[O-]	1.58415	7.52459	22.1844	105.078	199.139	c1cn[nH]c1	Pyr
Cc1noc(N(C)[N+](=O)[O-])n1	1.5527	7.52458	21.2473	48.9423	174.645	c1ncon1	Oxa-3
CN(c1ncn(C)c1N(CCO[N+](=O)[O-])[N+](=O)[O-])[N+](=O)[O-]	1.58108	7.524	23.1336	106.916	194.603	c1c[nH]cn1	Imi
Cc1nc(N(CCO[N+](=O)[O-])[N+](=O)[O-])c(N(CCO[N+](=O)[O-])[N+](=O)[O-])n1C	1.5791	7.52339	23.1926	104.819	197.676	c1c[nH]cn1	Imi
Cc1nonc1N(C)[N+](=O)[O-]	1.53973	7.52246	21.0505	54.3904	179.625	c1cnon1	Oxa-1
O=[N+]([O-])OCCc1nn(CCO[N+](=O)[O-])cc1N(CCO[N+](=O)[O-])[N+](=O)[O-]	1.6194	7.52202	22.6495	81.5699	176.708	c1cn[nH]c1	Pyr
Cc1c([N+](=O)[O-])c(CO[N+](=O)[O-])nn1CCO[N+](=O)[O-]	1.60395	7.52198	22.6281	89.4519	195.139	c1cn[nH]c1	Pyr
CN(c1nn(C)c(N(C)[N+](=O)[O-])c1N(C)[N+](=O)[O-])[N+](=O)[O-]	1.57204	7.52115	22.736	155.101	210.866	c1cn[nH]c1	Pyr
Cc1nc(N(CCO[N+](=O)[O-])[N+](=O)[O-])n(C)c1N(CCO[N+](=O)[O-])[N+](=O)[O-]	1.58319	7.52075	23.0012	107.404	195.54	c1c[nH]cn1	Imi
COc1nc(N(CCO[N+](=O)[O-])[N+](=O)[O-])c([N+](=O)[O-])n1CCO[N+](=O)[O-]	1.63685	7.52049	24.6923	88.8568	176.261	c1c[nH]cn1	Imi
COc1nc([N+](=O)[O-])nn1CCO[N+](=O)[O-]	1.61313	7.51999	23.1241	72.5994	185.076	c1nc[nH]n1	Tra-4
CN(c1cn(C)nc1N(CCO[N+](=O)[O-])[N+](=O)[O-])[N+](=O)[O-]	1.58401	7.51999	23.231	104.489	189.403	c1cn[nH]c1	Pyr
Cn1c([N+](=O)[O-])nc(CO[N+](=O)[O-])c1CCO[N+](=O)[O-]	1.59909	7.51998	22.43	92.4183	198.866	c1c[nH]cn1	Imi
Cc1nc(N(C)[N+](=O)[O-])no1	1.55251	7.51987	21.1298	53.9453	180.432	c1ncon1	Oxa-3
COc1nc(N(CCO[N+](=O)[O-])[N+](=O)[O-])n(CO[N+](=O)[O-])c1N(C)[N+](=O)[O-]	1.61264	7.51953	24.9571	106.574	181.062	c1c[nH]cn1	Imi
CN(c1cc(CCO[N+](=O)[O-])n(CO[N+](=O)[O-])n1)[N+](=O)[O-]	1.59902	7.51943	23.0183	92.0159	183.71	c1cn[nH]c1	Pyr
O=[N+]([O-])OCCc1c(CO[N+](=O)[O-])nn(CCO[N+](=O)[O-])c1CO[N+](=O)[O-]	1.64375	7.51779	22.6876	78.7245	164.227	c1cn[nH]c1	Pyr
CN(c1nc(N(C)[N+](=O)[O-])n(C)c1CO[N+](=O)[O-])[N+](=O)[O-]	1.57483	7.51768	22.7238	118.094	186.86	c1c[nH]cn1	Imi
COc1nnc([N+](=O)[O-])n1CCO[N+](=O)[O-]	1.60638	7.51712	23.4916	71.8488	178.455	c1nnc[nH]1	Tra-3
COc1c(CO[N+](=O)[O-])nn(CO[N+](=O)[O-])c1N(CCO[N+](=O)[O-])[N+](=O)[O-]	1.64055	7.51698	25.3953	100.584	173.667	c1cn[nH]c1	Pyr
COc1c([N+](=O)[O-])nnn1CCO[N+](=O)[O-]	1.61257	7.51655	22.8818	82.4722	192.825	c1c[nH]nn1	Tra-1
Cc1c(N(C)[N+](=O)[O-])c([N+](=O)[O-])nn1CCO[N+](=O)[O-]	1.58233	7.5157	22.0075	104.458	197.025	c1cn[nH]c1	Pyr
CN(c1nc(CCO[N+](=O)[O-])n(C)c1[N+](=O)[O-])[N+](=O)[O-]	1.58253	7.51555	22.0485	105.012	200.002	c1c[nH]cn1	Imi
COc1c(N(CCO[N+](=O)[O-])[N+](=O)[O-])nc(N(C)[N+](=O)[O-])n1CO[N+](=O)[O-]	1.61029	7.51548	24.6373	110.262	182.242	c1c[nH]cn1	Imi
Cc1nnoc1N(C)[N+](=O)[O-]	1.54187	7.5148	21.0437	51.1559	171.647	c1conn1	Oxa-4
Cn1nc([N+](=O)[O-])c(CCO[N+](=O)[O-])c1CO[N+](=O)[O-]	1.59532	7.51452	22.3446	95.4376	204.494	c1cn[nH]c1	Pyr
Cc1c(N(C)[N+](=O)[O-])c(N(CCO[N+](=O)[O-])[N+](=O)[O-])nn1CCO[N+](=O)[O-]	1.5762	7.51452	22.8916	117.376	208.042	c1cn[nH]c1	Pyr
COc1nc(N(CCO[N+](=O)[O-])[N+](=O)[O-])c(N(C)[N+](=O)[O-])n1CO[N+](=O)[O-]	1.61482	7.51438	24.9907	100.076	179.903	c1c[nH]cn1	Imi
CN(c1nc([N+](=O)[O-])cn1C)[N+](=O)[O-]	1.58092	7.51389	21.8257	109.23	211.646	c1c[nH]cn1	Imi
COc1nc(CO[N+](=O)[O-])n(CO[N+](=O)[O-])c1N(CCO[N+](=O)[O-])[N+](=O)[O-]	1.64025	7.51378	25.3416	94.2935	170.202	c1c[nH]cn1	Imi
CN(c1nc(CCO[N+](=O)[O-])c(N(CCO[N+](=O)[O-])[N+](=O)[O-])n1CCO[N+](=O)[O-])[N+](=O)[O-]	1.63697	7.5134	24.3355	123.609	201.454	c1c[nH]cn1	Imi
CN(c1nc(CCO[N+](=O)[O-])c([N+](=O)[O-])n1C)[N+](=O)[O-]	1.58377	7.51315	22.1558	105.637	200.752	c1c[nH]cn1	Imi
Cc1nn(C)c(N(CCO[N+](=O)[O-])[N+](=O)[O-])c1[N+](=O)[O-]	1.5771	7.51292	22.6342	103.653	203.274	c1cn[nH]c1	Pyr
O=[N+]([O-])OCCc1ncc([N+](=O)[O-])n1CCO[N+](=O)[O-]	1.61156	7.51258	22.2053	83.9999	204.752	c1c[nH]cn1	Imi
CN(c1cnn(C)c1[N+](=O)[O-])[N+](=O)[O-]	1.57534	7.51244	21.9564	104.43	207.922	c1cn[nH]c1	Pyr
O=[N+]([O-])OCCc1nnoc1CCO[N+](=O)[O-]	1.61336	7.51212	21.8391	48.9498	177.489	c1conn1	Oxa-4
CN(c1c(N(CCO[N+](=O)[O-])[N+](=O)[O-])nn(C)c1CCO[N+](=O)[O-])[N+](=O)[O-]	1.57654	7.51193	22.8081	114.932	206.293	c1cn[nH]c1	Pyr
CN(c1ncc(CO[N+](=O)[O-])n1CCO[N+](=O)[O-])[N+](=O)[O-]	1.59335	7.51182	22.6827	98.9325	190.145	c1c[nH]cn1	Imi
Cc1c([N+](=O)[O-])c(N(CCO[N+](=O)[O-])[N+](=O)[O-])nn1C	1.581	7.51165	22.6778	100.521	195.646	c1cn[nH]c1	Pyr
Cc1nn(CCO[N+](=O)[O-])c(N(C)[N+](=O)[O-])c1[N+](=O)[O-]	1.58406	7.51138	22.2417	102.264	195.473	c1cn[nH]c1	Pyr
Cn1nc(CO[N+](=O)[O-])c(CCO[N+](=O)[O-])c1N(CCO[N+](=O)[O-])[N+](=O)[O-]	1.60685	7.51115	23.0346	89.4908	183.82	c1cn[nH]c1	Pyr
O=[N+]([O-])OCCc1nc(CO[N+](=O)[O-])n(CCO[N+](=O)[O-])c1CO[N+](=O)[O-]	1.6413	7.51075	22.4756	86.9169	172.114	c1c[nH]cn1	Imi
Cc1c(N(C)[N+](=O)[O-])nc([N+](=O)[O-])n1CCO[N+](=O)[O-]	1.58251	7.50991	22.1047	105.62	200.197	c1c[nH]cn1	Imi
Cc1nnc(N(C)[N+](=O)[O-])o1	1.55793	7.50956	21.1577	55.4117	182.272	c1nnco1	Oxa-2
Cc1c(CCO[N+](=O)[O-])nnn1CO[N+](=O)[O-]	1.54153	7.50937	20.1154	76.2699	180.544	c1c[nH]nn1	Tra-1
COc1c(N(CCO[N+](=O)[O-])[N+](=O)[O-])nn(CO[N+](=O)[O-])c1N(C)[N+](=O)[O-]	1.61565	7.50924	24.9379	103.022	177.192	c1cn[nH]c1	Pyr
Cc1nc([N+](=O)[O-])c(CCO[N+](=O)[O-])n1CO[N+](=O)[O-]	1.5983	7.50905	22.6166	92.0342	199.26	c1c[nH]cn1	Imi
Cn1c(N(CCO[N+](=O)[O-])[N+](=O)[O-])nc(CCO[N+](=O)[O-])c1N(CCO[N+](=O)[O-])[N+](=O)[O-]	1.6355	7.50878	24.4136	120.578	197.221	c1c[nH]cn1	Imi
Cc1nnnn1CCO[N+](=O)[O-]	1.51065	7.50833	19.1811	64.3235	180.745	c1nnn[nH]1	Tet-1
Cc1nc(N(CCO[N+](=O)[O-])[N+](=O)[O-])c([N+](=O)[O-])n1C	1.58133	7.50785	22.6692	100.93	196.897	c1c[nH]cn1	Imi
Cc1nc(CCO[N+](=O)[O-])c(N(CCO[N+](=O)[O-])[N+](=O)[O-])n1CO[N+](=O)[O-]	1.60744	7.50772	23.0688	86.9914	180.22	c1c[nH]cn1	Imi
O=[N+]([O-])OCCc1c(CO[N+](=O)[O-])nc(CO[N+](=O)[O-])n1CCO[N+](=O)[O-]	1.64165	7.50752	22.5564	77.8927	162.304	c1c[nH]cn1	Imi
COc1nn(CCO[N+](=O)[O-])c([N+](=O)[O-])c1N(CCO[N+](=O)[O-])[N+](=O)[O-]	1.64041	7.50704	24.8804	89.0498	174.949	c1cn[nH]c1	Pyr
O=[N+]([O-])OCCc1nn(CCO[N+](=O)[O-])c(CO[N+](=O)[O-])c1N(CCO[N+](=O)[O-])[N+](=O)[O-]	1.66898	7.50661	24.3386	103.835	182.639	c1cn[nH]c1	Pyr
CN(c1c(CO[N+](=O)[O-])nn(CCO[N+](=O)[O-])c1CCO[N+](=O)[O-])[N+](=O)[O-]	1.61004	7.50656	22.542	87.0632	177.446	c1cn[nH]c1	Pyr
Cc1c(CO[N+](=O)[O-])nn(CCO[N+](=O)[O-])c1N(CCO[N+](=O)[O-])[N+](=O)[O-]	1.60676	7.50579	22.9397	93.2152	185.292	c1cn[nH]c1	Pyr
CN(c1c(CCO[N+](=O)[O-])nn(C)c1[N+](=O)[O-])[N+](=O)[O-]	1.58087	7.50561	22.1607	104.272	198.778	c1cn[nH]c1	Pyr
Cc1c(CCO[N+](=O)[O-])nc(N(CCO[N+](=O)[O-])[N+](=O)[O-])n1CO[N+](=O)[O-]	1.60966	7.50547	23.1297	84.7915	175.83	c1c[nH]cn1	Imi
Cc1nc([N+](=O)[O-])c(CO[N+](=O)[O-])n1CCO[N+](=O)[O-]	1.59946	7.50484	22.577	89.92	196.233	c1c[nH]cn1	Imi
CN(c1cn(C)c([N+](=O)[O-])n1)[N+](=O)[O-]	1.58525	7.50456	22.0444	107.578	210.315	c1c[nH]cn1	Imi
Cc1nc(N(CCO[N+](=O)[O-])[N+](=O)[O-])n(C)c1[N+](=O)[O-]	1.58217	7.50455	22.5873	104.35	197.814	c1c[nH]cn1	Imi
CN(c1nn(CCO[N+](=O)[O-])c(N(C)[N+](=O)[O-])c1CCO[N+](=O)[O-])[N+](=O)[O-]	1.58453	7.50436	22.5504	112.474	199.61	c1cn[nH]c1	Pyr
CN(c1nn(CO[N+](=O)[O-])c(CCO[N+](=O)[O-])c1CCO[N+](=O)[O-])[N+](=O)[O-]	1.60712	7.50419	22.7294	96.5378	190.516	c1cn[nH]c1	Pyr
COc1c(N(CCO[N+](=O)[O-])[N+](=O)[O-])c(CO[N+](=O)[O-])nn1CO[N+](=O)[O-]	1.64285	7.50397	25.3293	99.4095	162.667	c1cn[nH]c1	Pyr
O=[N+]([O-])OCCc1nc(CO[N+](=O)[O-])c(CCO[N+](=O)[O-])n1CO[N+](=O)[O-]	1.64006	7.50382	22.6018	83.905	171.694	c1c[nH]cn1	Imi
CN(c1c([N+](=O)[O-])nn(C)c1CCO[N+](=O)[O-])[N+](=O)[O-]	1.58099	7.50342	22.004	103.437	196.622	c1cn[nH]c1	Pyr
O=[N+]([O-])OCCc1nc(CO[N+](=O)[O-])c(CO[N+](=O)[O-])n1CCO[N+](=O)[O-]	1.64013	7.50255	22.4926	79.5891	165.472	c1c[nH]cn1	Imi
COc1cnn(CO[N+](=O)[O-])c1[N+](=O)[O-]	1.63355	7.50224	24.1306	85.537	207.271	c1cn[nH]c1	Pyr
CN(c1c(CCO[N+](=O)[O-])c(CO[N+](=O)[O-])nn1CCO[N+](=O)[O-])[N+](=O)[O-]	1.60833	7.50147	22.5158	92.63	184.244	c1cn[nH]c1	Pyr
O=[N+]([O-])OCCc1nn(CO[N+](=O)[O-])c(CO[N+](=O)[O-])c1CCO[N+](=O)[O-]	1.64553	7.50146	22.7403	91.8707	179.228	c1cn[nH]c1	Pyr
CN(c1ncn(CO[N+](=O)[O-])c1CCO[N+](=O)[O-])[N+](=O)[O-]	1.59065	7.50125	22.6006	106.168	197.408	c1c[nH]cn1	Imi
O=[N+]([O-])OCCc1cnc(N(CCO[N+](=O)[O-])[N+](=O)[O-])n1CCO[N+](=O)[O-]	1.62392	7.50105	22.6244	77.2855	174.327	c1c[nH]cn1	Imi
CN(c1c(N(CCO[N+](=O)[O-])[N+](=O)[O-])c(CCO[N+](=O)[O-])nn1C)[N+](=O)[O-]	1.58508	7.50035	22.94	104.974	196.399	c1cn[nH]c1	Pyr
COc1c([N+](=O)[O-])c(N(CCO[N+](=O)[O-])[N+](=O)[O-])nn1CCO[N+](=O)[O-]	1.63841	7.49995	24.7087	90.0155	174.866	c1cn[nH]c1	Pyr
COc1nnc(N(C)[N+](=O)[O-])n1CO[N+](=O)[O-]	1.5804	7.49985	24.222	90.6768	154.167	c1nnc[nH]1	Tra-3
COc1cc([N+](=O)[O-])n(CO[N+](=O)[O-])n1	1.62932	7.49955	24.3708	84.2143	204.637	c1cn[nH]c1	Pyr
O=[N+]([O-])OCCc1c([N+](=O)[O-])ncn1CCO[N+](=O)[O-]	1.60688	7.49785	21.9367	83.0035	202.334	c1c[nH]cn1	Imi
O=[N+]([O-])OCCc1c([N+](=O)[O-])cnn1CCO[N+](=O)[O-]	1.61447	7.4976	22.2475	81.7472	202.49	c1cn[nH]c1	Pyr
Cc1onnc1N(C)[N+](=O)[O-]	1.54005	7.49683	20.9831	54.1772	174.226	c1conn1	Oxa-4
Cn1nc(N(CCO[N+](=O)[O-])[N+](=O)[O-])c(CO[N+](=O)[O-])c1CCO[N+](=O)[O-]	1.60458	7.4966	22.8372	91.2072	183.671	c1cn[nH]c1	Pyr
Cc1c(N(CCO[N+](=O)[O-])[N+](=O)[O-])c(CCO[N+](=O)[O-])nn1CO[N+](=O)[O-]	1.60814	7.49564	22.9884	90.2346	181.738	c1cn[nH]c1	Pyr
COc1c(N(C)[N+](=O)[O-])c(N(CCO[N+](=O)[O-])[N+](=O)[O-])nn1CO[N+](=O)[O-]	1.61077	7.49538	24.9307	109.143	186.11	c1cn[nH]c1	Pyr
Cc1c(N(CCO[N+](=O)[O-])[N+](=O)[O-])nc([N+](=O)[O-])n1C	1.57796	7.49496	22.4565	105.406	198.785	c1c[nH]cn1	Imi
Cc1nn(CCO[N+](=O)[O-])nc1CO[N+](=O)[O-]	1.54324	7.49495	20.2381	69.0055	177.379	c1cn[nH]n1	Tra-2
Cc1nc(N(C)[N+](=O)[O-])n(CO[N+](=O)[O-])c1N(C)[N+](=O)[O-]	1.56782	7.49405	22.9525	128.626	188.182	c1c[nH]cn1	Imi
Cc1nn(CO[N+](=O)[O-])nc1CCO[N+](=O)[O-]	1.54614	7.49352	20.6583	66.1606	177.714	c1cn[nH]n1	Tra-2
CN(c1nc(CCO[N+](=O)[O-])n(CCO[N+](=O)[O-])n1)[N+](=O)[O-]	1.58483	7.49351	22.4168	88.5726	168.825	c1nc[nH]n1	Tra-4
COc1nn(CCO[N+](=O)[O-])c(N(CCO[N+](=O)[O-])[N+](=O)[O-])c1[N+](=O)[O-]	1.63411	7.49345	24.7371	93.8818	180.848	c1cn[nH]c1	Pyr
O=[N+]([O-])OCCc1nn(CCO[N+](=O)[O-])c(CO[N+](=O)[O-])c1CO[N+](=O)[O-]	1.64144	7.49318	22.6375	86.0076	174.859	c1cn[nH]c1	Pyr
Cn1nnnc1CCO[N+](=O)[O-]	1.506	7.4926	19.1414	61.3121	178.262	c1nnn[nH]1	Tet-1
COc1nc(CO[N+](=O)[O-])no1	1.61045	7.49242	23.0124	56.9149	183.573	c1ncon1	Oxa-3
CN(c1c(CCO[N+](=O)[O-])nn(CCO[N+](=O)[O-])c1CO[N+](=O)[O-])[N+](=O)[O-]	1.60913	7.4918	22.5258	93.0234	181.165	c1cn[nH]c1	Pyr
O=[N+]([O-])OCCc1cn(CCO[N+](=O)[O-])c(N(CCO[N+](=O)[O-])[N+](=O)[O-])n1	1.62414	7.49178	22.7955	76.4946	173.89	c1c[nH]cn1	Imi
COc1c([N+](=O)[O-])nn(CCO[N+](=O)[O-])c1N(CCO[N+](=O)[O-])[N+](=O)[O-]	1.63659	7.4916	24.6551	91.6748	173.851	c1cn[nH]c1	Pyr
Cc1nc(CO[N+](=O)[O-])n(CCO[N+](=O)[O-])c1N(CCO[N+](=O)[O-])[N+](=O)[O-]	1.60714	7.49157	22.963	88.1836	181.036	c1c[nH]cn1	Imi
Cc1nn(CCO[N+](=O)[O-])c(CO[N+](=O)[O-])c1N(CCO[N+](=O)[O-])[N+](=O)[O-]	1.60501	7.49145	22.9746	97.9285	190.96	c1cn[nH]c1	Pyr
Cc1nc(CCO[N+](=O)[O-])n(CO[N+](=O)[O-])c1N(CCO[N+](=O)[O-])[N+](=O)[O-]	1.61282	7.49047	23.1004	81.4425	173.398	c1c[nH]cn1	Imi
CN(c1c(CCO[N+](=O)[O-])nc(N(CCO[N+](=O)[O-])[N+](=O)[O-])n1CCO[N+](=O)[O-])[N+](=O)[O-]	1.63817	7.49016	24.3319	117.897	190.96	c1c[nH]cn1	Imi
COc1nonc1CO[N+](=O)[O-]	1.61105	7.48986	23.4587	54.6551	176.924	c1cnon1	Oxa-1
Cn1c(CCO[N+](=O)[O-])nc(N(CCO[N+](=O)[O-])[N+](=O)[O-])c1CO[N+](=O)[O-]	1.60092	7.48961	22.6322	92.3312	184.929	c1c[nH]cn1	Imi
CN(c1cn(C)c(N(CCO[N+](=O)[O-])[N+](=O)[O-])n1)[N+](=O)[O-]	1.58276	7.48958	23.0363	108.512	187.438	c1c[nH]cn1	Imi
COc1cn(CO[N+](=O)[O-])c([N+](=O)[O-])n1	1.63033	7.48924	24.0466	81.2016	203.142	c1c[nH]cn1	Imi
Cc1c([N+](=O)[O-])nn(CCO[N+](=O)[O-])c1CO[N+](=O)[O-]	1.59765	7.48913	22.6657	96.8179	198.752	c1cn[nH]c1	Pyr
Cc1c(N(CCO[N+](=O)[O-])[N+](=O)[O-])nc(CO[N+](=O)[O-])n1CCO[N+](=O)[O-]	1.60789	7.48851	22.7571	84.2207	174.857	c1c[nH]cn1	Imi
COc1onnc1CO[N+](=O)[O-]	1.61187	7.48849	23.5541	47.3854	172.023	c1conn1	Oxa-4
COc1cc([N+](=O)[O-])nn1CO[N+](=O)[O-]	1.63075	7.48824	24.0543	85.2936	205.707	c1cn[nH]c1	Pyr
COc1nnc(CO[N+](=O)[O-])o1	1.61725	7.48819	23.3217	48.5585	179.901	c1nnco1	Oxa-2
Cc1nc(CCO[N+](=O)[O-])nn1CO[N+](=O)[O-]	1.54767	7.48789	20.2502	69.7968	178.177	c1nc[nH]n1	Tra-4
O=[N+]([O-])OCCc1cnc([N+](=O)[O-])n1CCO[N+](=O)[O-]	1.61421	7.48755	22.4861	78.449	200.104	c1c[nH]cn1	Imi
CN(c1c(CCO[N+](=O)[O-])c(CCO[N+](=O)[O-])nn1CO[N+](=O)[O-])[N+](=O)[O-]	1.61004	7.48693	22.6253	99.7135	188.243	c1cn[nH]c1	Pyr
COc1noc(CO[N+](=O)[O-])n1	1.61343	7.48689	23.1621	60.1226	185.377	c1ncon1	Oxa-3
Cc1nc(N(CCO[N+](=O)[O-])[N+](=O)[O-])c(CCO[N+](=O)[O-])n1CO[N+](=O)[O-]	1.60349	7.48688	22.9416	93.5252	188.351	c1c[nH]cn1	Imi
CN(c1nc(N(CCO[N+](=O)[O-])[N+](=O)[O-])n(C)c1CCO[N+](=O)[O-])[N+](=O)[O-]	1.57597	7.48678	22.5696	121.407	209.372	c1c[nH]cn1	Imi
CN(c1cc(N(C)[N+](=O)[O-])n(CCO[N+](=O)[O-])n1)[N+](=O)[O-]	1.57309	7.48653	22.4144	125.561	197.56	c1cn[nH]c1	Pyr
Cc1nc(N(C)[N+](=O)[O-])c([N+](=O)[O-])n1CCO[N+](=O)[O-]	1.57484	7.48568	22.2716	107.156	206.76	c1c[nH]cn1	Imi
Cc1c([N+](=O)[O-])nc(CO[N+](=O)[O-])n1CCO[N+](=O)[O-]	1.5963	7.48561	22.404	95.8004	199.551	c1c[nH]cn1	Imi
CN(c1c(CO[N+](=O)[O-])c(CCO[N+](=O)[O-])nn1CCO[N+](=O)[O-])[N+](=O)[O-]	1.60916	7.48529	22.5394	94.6247	183.14	c1cn[nH]c1	Pyr
COc1nnoc1CO[N+](=O)[O-]	1.61437	7.485	23.4914	53.0869	178.213	c1conn1	Oxa-4
Cc1nn(CO[N+](=O)[O-])c(CCO[N+](=O)[O-])c1[N+](=O)[O-]	1.59768	7.48474	22.7022	98.9738	202.258	c1cn[nH]c1	Pyr
COc1nc(CO[N+](=O)[O-])c(N(CCO[N+](=O)[O-])[N+](=O)[O-])n1CO[N+](=O)[O-]	1.64072	7.4846	25.1475	108.015	170.974	c1c[nH]cn1	Imi
COc1nc(N(CCO[N+](=O)[O-])[N+](=O)[O-])n(CCO[N+](=O)[O-])c1[N+](=O)[O-]	1.63775	7.48412	24.8942	94.7127	176.086	c1c[nH]cn1	Imi
Cc1c([N+](=O)[O-])nc(CCO[N+](=O)[O-])n1CO[N+](=O)[O-]	1.59688	7.48391	22.5559	96.1113	200.523	c1c[nH]cn1	Imi
COc1c([N+](=O)[O-])cnn1CO[N+](=O)[O-]	1.6294	7.48365	23.7713	89.4832	209.109	c1cn[nH]c1	Pyr
CN(c1c([N+](=O)[O-])cnn1C)[N+](=O)[O-]	1.56169	7.48364	21.776	100.027	205.251	c1cn[nH]c1	Pyr
Cc1nn(C)c([N+](=O)[O-])c1N(CCO[N+](=O)[O-])[N+](=O)[O-]	1.57594	7.48362	22.842	103.483	207.379	c1cn[nH]c1	Pyr
CN(c1c([N+](=O)[O-])nc(CCO[N+](=O)[O-])n1C)[N+](=O)[O-]	1.57467	7.48356	21.8685	106.568	202.641	c1c[nH]cn1	Imi
CN(c1nc(N(C)[N+](=O)[O-])n(C)c1N(C)[N+](=O)[O-])[N+](=O)[O-]	1.5675	7.48342	22.3529	156.845	202.903	c1c[nH]cn1	Imi
COc1nn(CO[N+](=O)[O-])cc1[N+](=O)[O-]	1.62593	7.48337	23.7835	87.2699	206.875	c1cn[nH]c1	Pyr
O=[N+]([O-])OCCc1cc(N(CCO[N+](=O)[O-])[N+](=O)[O-])nn1CCO[N+](=O)[O-]	1.6208	7.48321	22.5957	85.5877	181.867	c1cn[nH]c1	Pyr
O=[N+]([O-])OCCc1cc([N+](=O)[O-])nn1CCO[N+](=O)[O-]	1.60974	7.48312	22.2552	84.7843	203.356	c1cn[nH]c1	Pyr
COc1ncn(CO[N+](=O)[O-])c1[N+](=O)[O-]	1.62249	7.48299	23.7561	84.7091	204.936	c1c[nH]cn1	Imi
COc1c(N(CCO[N+](=O)[O-])[N+](=O)[O-])nc([N+](=O)[O-])n1CCO[N+](=O)[O-]	1.63572	7.48285	24.7072	92.881	172.27	c1c[nH]cn1	Imi
COc1c([N+](=O)[O-])nc(N(CCO[N+](=O)[O-])[N+](=O)[O-])n1CCO[N+](=O)[O-]	1.63406	7.48272	24.5367	93.6696	175.505	c1c[nH]cn1	Imi
Cn1c([N+](=O)[O-])nc(CCO[N+](=O)[O-])c1CO[N+](=O)[O-]	1.59314	7.48226	22.4378	102.914	203.794	c1c[nH]cn1	Imi
CN(c1c(N(CCO[N+](=O)[O-])[N+](=O)[O-])nc(CCO[N+](=O)[O-])n1CCO[N+](=O)[O-])[N+](=O)[O-]	1.63546	7.48168	24.1079	125.57	196.031	c1c[nH]cn1	Imi
Cc1c(N(CCO[N+](=O)[O-])[N+](=O)[O-])nn(CCO[N+](=O)[O-])c1N(C)[N+](=O)[O-]	1.5842	7.48121	22.866	111.427	198.34	c1cn[nH]c1	Pyr
CN(c1nc(CCO[N+](=O)[O-])c(CO[N+](=O)[O-])n1CCO[N+](=O)[O-])[N+](=O)[O-]	1.60871	7.48115	22.636	89.6331	182.012	c1c[nH]cn1	Imi
COc1cn(CO[N+](=O)[O-])nc1[N+](=O)[O-]	1.6278	7.48077	23.8927	84.4646	204.863	c1cn[nH]c1	Pyr
CN(c1cc(CO[N+](=O)[O-])nn1CCO[N+](=O)[O-])[N+](=O)[O-]	1.59259	7.48071	22.8251	102.144	188.344	c1cn[nH]c1	Pyr
CN(c1c(CCO[N+](=O)[O-])nc(CCO[N+](=O)[O-])n1CO[N+](=O)[O-])[N+](=O)[O-]	1.6087	7.48069	22.5578	97.8364	186.07	c1c[nH]cn1	Imi
COc1c(N(CCO[N+](=O)[O-])[N+](=O)[O-])c([N+](=O)[O-])nn1CCO[N+](=O)[O-]	1.62952	7.47954	24.4741	99.3404	181.575	c1cn[nH]c1	Pyr
Cn1cc(N(CCO[N+](=O)[O-])[N+](=O)[O-])c(CO[N+](=O)[O-])n1	1.58706	7.4795	23.399	108.844	209.243	c1cn[nH]c1	Pyr
Cc1nc(CO[N+](=O)[O-])c(N(CCO[N+](=O)[O-])[N+](=O)[O-])n1CCO[N+](=O)[O-]	1.60563	7.47908	22.9949	87.9491	181.317	c1c[nH]cn1	Imi
Cc1c([N+](=O)[O-])nc(N(CCO[N+](=O)[O-])[N+](=O)[O-])n1C	1.56853	7.47809	22.2412	111.246	208.69	c1c[nH]cn1	Imi
COc1nc([N+](=O)[O-])cn1CO[N+](=O)[O-]	1.62983	7.47644	23.7684	82.9587	204.084	c1c[nH]cn1	Imi
Cc1nc(CO[N+](=O)[O-])nn1CCO[N+](=O)[O-]	1.54522	7.47595	20.0302	75.9842	180.732	c1nc[nH]n1	Tra-4
CN(c1nn(C)c(N(C)[N+](=O)[O-])c1CO[N+](=O)[O-])[N+](=O)[O-]	1.56667	7.47508	22.7041	128.587	189.489	c1cn[nH]c1	Pyr
Cc1nnn(CO[N+](=O)[O-])c1CCO[N+](=O)[O-]	1.54695	7.47496	20.5822	65.1521	176.937	c1c[nH]nn1	Tra-1
Cc1c([N+](=O)[O-])nn(CCO[N+](=O)[O-])c1N(C)[N+](=O)[O-]	1.58113	7.47405	22.2724	107.655	195.466	c1cn[nH]c1	Pyr
CN(c1ncn(C)c1[N+](=O)[O-])[N+](=O)[O-]	1.57007	7.47347	21.9149	103.566	208.506	c1c[nH]cn1	Imi
COc1c([N+](=O)[O-])ncn1CO[N+](=O)[O-]	1.62957	7.47288	23.5205	88.7799	207.882	c1c[nH]cn1	Imi
CN(c1nc(N(CCO[N+](=O)[O-])[N+](=O)[O-])cn1C)[N+](=O)[O-]	1.57792	7.47267	22.9406	113.822	188.037	c1c[nH]cn1	Imi
O=[N+]([O-])OCCc1c(N(CCO[N+](=O)[O-])[N+](=O)[O-])cnn1CCO[N+](=O)[O-]	1.62671	7.47257	22.695	78.1362	175.598	c1cn[nH]c1	Pyr
Cc1nc([N+](=O)[O-])c(N(CCO[N+](=O)[O-])[N+](=O)[O-])n1C	1.56755	7.47204	22.5556	108.379	210.908	c1c[nH]cn1	Imi
CN(c1nc(CCO[N+](=O)[O-])n(CCO[N+](=O)[O-])c1CO[N+](=O)[O-])[N+](=O)[O-]	1.59982	7.47099	22.5873	100.892	193.386	c1c[nH]cn1	Imi
Cn1nc(CO[N+](=O)[O-])c(N(CCO[N+](=O)[O-])[N+](=O)[O-])c1CCO[N+](=O)[O-]	1.60328	7.47088	22.5727	100.088	189.106	c1cn[nH]c1	Pyr
Cn1nc(CCO[N+](=O)[O-])c(CO[N+](=O)[O-])n1	1.54668	7.47053	20.3654	64.7472	175.518	c1cn[nH]n1	Tra-2
Cc1c(N(CCO[N+](=O)[O-])[N+](=O)[O-])nc(CCO[N+](=O)[O-])n1CO[N+](=O)[O-]	1.60871	7.47048	22.9646	88.0648	176.461	c1c[nH]cn1	Imi
COc1c(CO[N+](=O)[O-])nn(CO[N+](=O)[O-])c1CO[N+](=O)[O-]	1.62709	7.47038	23.7651	83.1017	161.244	c1cn[nH]c1	Pyr
O=[N+]([O-])OCCc1nc(CO[N+](=O)[O-])n(CO[N+](=O)[O-])c1CCO[N+](=O)[O-]	1.64273	7.47002	22.655	87.673	177.032	c1c[nH]cn1	Imi
Cc1nc([N+](=O)[O-])c(N(C)[N+](=O)[O-])n1CCO[N+](=O)[O-]	1.5716	7.46949	21.8857	108.665	201.867	c1c[nH]cn1	Imi
Cn1c(CCO[N+](=O)[O-])nc(CO[N+](=O)[O-])c1N(CCO[N+](=O)[O-])[N+](=O)[O-]	1.6054	7.46921	22.7381	89.5781	182.039	c1c[nH]cn1	Imi
O=[N+]([O-])OCCc1nc([N+](=O)[O-])cn1CCO[N+](=O)[O-]	1.6065	7.46915	22.034	87.3275	205.272	c1c[nH]cn1	Imi
CN(c1c(CCO[N+](=O)[O-])c([N+](=O)[O-])nn1C)[N+](=O)[O-]	1.57047	7.46765	21.8724	114.662	205.178	c1cn[nH]c1	Pyr
Cc1nn(CO[N+](=O)[O-])c(N(CCO[N+](=O)[O-])[N+](=O)[O-])c1CCO[N+](=O)[O-]	1.60671	7.46748	23.1079	100.11	188.04	c1cn[nH]c1	Pyr
CN(c1c(CCO[N+](=O)[O-])nc([N+](=O)[O-])n1C)[N+](=O)[O-]	1.58139	7.46664	22.1702	107.472	196.259	c1c[nH]cn1	Imi
Cc1nc([N+](=O)[O-])n(C)c1[N+](=O)[O-]	1.58203	7.4663	21.5705	111.79	235.618	c1c[nH]cn1	Imi
COc1c(CO[N+](=O)[O-])c(CO[N+](=O)[O-])nn1CO[N+](=O)[O-]	1.63184	7.46562	24.0129	79.9377	157.319	c1cn[nH]c1	Pyr
CN(c1cn(CCO[N+](=O)[O-])c(N(C)[N+](=O)[O-])n1)[N+](=O)[O-]	1.57087	7.46551	22.2511	126.252	198.4	c1c[nH]cn1	Imi
CN(c1nc(CCO[N+](=O)[O-])n(CO[N+](=O)[O-])c1CCO[N+](=O)[O-])[N+](=O)[O-]	1.61118	7.46485	22.671	87.6957	176.58	c1c[nH]cn1	Imi
Cn1c(N(CCO[N+](=O)[O-])[N+](=O)[O-])nc(CO[N+](=O)[O-])c1CCO[N+](=O)[O-]	1.60378	7.46466	22.4999	101.721	188.573	c1c[nH]cn1	Imi
CN(c1nc([N+](=O)[O-])n(C)c1CCO[N+](=O)[O-])[N+](=O)[O-]	1.57369	7.46466	21.8346	111.95	199.648	c1c[nH]cn1	Imi
O=[N+]([O-])OCCc1nn(CCO[N+](=O)[O-])c([N+](=O)[O-])c1CCO[N+](=O)[O-]	1.62603	7.46436	22.2621	85.2463	193.956	c1cn[nH]c1	Pyr
CN(c1cn(CCO[N+](=O)[O-])c(CO[N+](=O)[O-])n1)[N+](=O)[O-]	1.59076	7.46421	22.6539	101.802	188.588	c1c[nH]cn1	Imi
CN(c1nc(CCO[N+](=O)[O-])n(C)c1N(CCO[N+](=O)[O-])[N+](=O)[O-])[N+](=O)[O-]	1.58246	7.46409	22.7994	109.065	199.87	c1c[nH]cn1	Imi
COc1c(CO[N+](=O)[O-])nc(CO[N+](=O)[O-])n1CO[N+](=O)[O-]	1.62794	7.4637	23.7665	83.2608	158.921	c1c[nH]cn1	Imi
O=[N+]([O-])OCCc1nc(N(CCO[N+](=O)[O-])[N+](=O)[O-])c(CCO[N+](=O)[O-])n1CCO[N+](=O)[O-]	1.6308	7.46331	22.3714	85.8347	173.892	c1c[nH]cn1	Imi
CN(c1cn(C)nc1[N+](=O)[O-])[N+](=O)[O-]	1.56253	7.46316	21.8041	108.606	205.042	c1cn[nH]c1	Pyr
Cc1nc([N+](=O)[O-])n(CCO[N+](=O)[O-])c1N(C)[N+](=O)[O-]	1.57431	7.4628	22.2801	114.466	196.114	c1c[nH]cn1	Imi
Cc1c([N+](=O)[O-])nn(C)c1[N+](=O)[O-]	1.58114	7.46219	21.5476	109.619	234.805	c1cn[nH]c1	Pyr
CN(c1c(CCO[N+](=O)[O-])nn(CCO[N+](=O)[O-])c1N(C)[N+](=O)[O-])[N+](=O)[O-]	1.58747	7.46209	22.5972	108.756	196.078	c1cn[nH]c1	Pyr
COc1cnc([N+](=O)[O-])n1CO[N+](=O)[O-]	1.61844	7.46207	24.4515	84.7189	198.414	c1c[nH]cn1	Imi
CN(c1nn(C)c(N(CCO[N+](=O)[O-])[N+](=O)[O-])c1CCO[N+](=O)[O-])[N+](=O)[O-]	1.58078	7.46101	22.7688	117.293	204.987	c1cn[nH]c1	Pyr
Cc1cnn(CO[N+](=O)[O-])n1	1.52191	7.46097	19.8326	70.6875	195.357	c1cn[nH]n1	Tra-2
Cc1c(N(CCO[N+](=O)[O-])[N+](=O)[O-])c(N(CCO[N+](=O)[O-])[N+](=O)[O-])nn1C	1.57366	7.46092	23.064	123.016	211.396	c1cn[nH]c1	Pyr
COc1nc([N+](=O)[O-])n(CCO[N+](=O)[O-])c1N(CCO[N+](=O)[O-])[N+](=O)[O-]	1.63157	7.46042	24.9037	97.7657	182.087	c1c[nH]cn1	Imi
Cc1c(CO[N+](=O)[O-])nnn1CCO[N+](=O)[O-]	1.54147	7.46001	20.2186	69.0721	178.677	c1c[nH]nn1	Tra-1
Cn1nc(CCO[N+](=O)[O-])nc1CO[N+](=O)[O-]	1.54769	7.45984	20.2267	67.0242	176.952	c1nc[nH]n1	Tra-4
CN(c1c([N+](=O)[O-])ncn1C)[N+](=O)[O-]	1.56281	7.45969	21.7094	107.414	207.883	c1c[nH]cn1	Imi
Cc1c(N(CCO[N+](=O)[O-])[N+](=O)[O-])c([N+](=O)[O-])nn1C	1.56937	7.45925	22.5878	105.434	207.867	c1cn[nH]c1	Pyr
O=[N+]([O-])OCCc1cnn(CCO[N+](=O)[O-])n1	1.55608	7.45871	19.6448	61.3665	173.29	c1cn[nH]n1	Tra-2
Cn1nc(N(CCO[N+](=O)[O-])[N+](=O)[O-])c(CCO[N+](=O)[O-])c1CO[N+](=O)[O-]	1.60624	7.45858	22.7817	93.4987	181.369	c1cn[nH]c1	Pyr
O=[N+]([O-])OCCc1nc(CCO[N+](=O)[O-])n(CO[N+](=O)[O-])c1CO[N+](=O)[O-]	1.64365	7.4584	22.7769	82.3322	167.241	c1c[nH]cn1	Imi
Cc1nc(N(C)[N+](=O)[O-])c(N(CCO[N+](=O)[O-])[N+](=O)[O-])n1CCO[N+](=O)[O-]	1.57529	7.45811	22.8657	127.984	216.922	c1c[nH]cn1	Imi
CN(c1nn(C)cc1[N+](=O)[O-])[N+](=O)[O-]	1.55969	7.4571	21.8245	99.3181	204.709	c1cn[nH]c1	Pyr
CN(c1c(CCO[N+](=O)[O-])nn(CO[N+](=O)[O-])c1CCO[N+](=O)[O-])[N+](=O)[O-]	1.60791	7.45692	22.689	107.666	200.096	c1cn[nH]c1	Pyr
COc1c(N(CCO[N+](=O)[O-])[N+](=O)[O-])nn(CCO[N+](=O)[O-])c1[N+](=O)[O-]	1.63264	7.45624	24.7524	103.719	186.474	c1cn[nH]c1	Pyr
COc1nc([N+](=O)[O-])c(N(CCO[N+](=O)[O-])[N+](=O)[O-])n1CCO[N+](=O)[O-]	1.63241	7.45573	24.719	94.4342	179.414	c1c[nH]cn1	Imi
COc1c(N(CCO[N+](=O)[O-])[N+](=O)[O-])nnn1CCO[N+](=O)[O-]	1.58758	7.45569	22.6745	74.93	169.214	c1c[nH]nn1	Tra-1
CN(c1nc(N(C)[N+](=O)[O-])n(CCO[N+](=O)[O-])c1CCO[N+](=O)[O-])[N+](=O)[O-]	1.58196	7.45497	22.5695	115.193	204.98	c1c[nH]cn1	Imi
Cn1nc(CO[N+](=O)[O-])nc1CCO[N+](=O)[O-]	1.54328	7.4548	20.1552	67.2251	176.908	c1nc[nH]n1	Tra-4
Cc1c(N(CCO[N+](=O)[O-])[N+](=O)[O-])c(CO[N+](=O)[O-])nn1CCO[N+](=O)[O-]	1.60381	7.4547	22.5477	98.9692	185.058	c1cn[nH]c1	Pyr
CN(c1nc([N+](=O)[O-])c(CCO[N+](=O)[O-])n1C)[N+](=O)[O-]	1.57687	7.45446	22.0261	108.427	197.485	c1c[nH]cn1	Imi
CN(c1c(CO[N+](=O)[O-])nc(CCO[N+](=O)[O-])n1CCO[N+](=O)[O-])[N+](=O)[O-]	1.60521	7.45412	22.3343	107.351	197.971	c1c[nH]cn1	Imi
COc1ncc([N+](=O)[O-])n1CO[N+](=O)[O-]	1.61108	7.45341	24.1461	90.2931	202.452	c1c[nH]cn1	Imi
O=[N+]([O-])OCCc1c(CO[N+](=O)[O-])nn(CO[N+](=O)[O-])c1CCO[N+](=O)[O-]	1.64377	7.4534	22.857	93.0195	172.043	c1cn[nH]c1	Pyr
CN(c1nn(CCO[N+](=O)[O-])c(CO[N+](=O)[O-])c1CCO[N+](=O)[O-])[N+](=O)[O-]	1.61079	7.4533	22.6479	91.7042	178.015	c1cn[nH]c1	Pyr
COc1nnn(CCO[N+](=O)[O-])c1N(CCO[N+](=O)[O-])[N+](=O)[O-]	1.59817	7.45305	23.0867	65.3726	163.359	c1c[nH]nn1	Tra-1
Cc1nc(N(C)[N+](=O)[O-])n(CCO[N+](=O)[O-])c1[N+](=O)[O-]	1.56915	7.45251	21.9372	119.379	209.657	c1c[nH]cn1	Imi
Cc1c(N(CCO[N+](=O)[O-])[N+](=O)[O-])nc(N(C)[N+](=O)[O-])n1CCO[N+](=O)[O-]	1.58046	7.45186	22.7376	114.42	202.526	c1c[nH]cn1	Imi
CN(c1nc(CCO[N+](=O)[O-])c(N(C)[N+](=O)[O-])n1CCO[N+](=O)[O-])[N+](=O)[O-]	1.5839	7.45124	22.4555	115.634	199.579	c1c[nH]cn1	Imi
Cc1c(N(CCO[N+](=O)[O-])[N+](=O)[O-])nc(N(CCO[N+](=O)[O-])[N+](=O)[O-])n1C	1.5819	7.45087	23.1441	110.718	193.385	c1c[nH]cn1	Imi
CN(c1nn(C)c([N+](=O)[O-])c1CCO[N+](=O)[O-])[N+](=O)[O-]	1.5774	7.45019	22.2418	111.853	196.565	c1cn[nH]c1	Pyr
COc1nn(CO[N+](=O)[O-])c(N(CCO[N+](=O)[O-])[N+](=O)[O-])c1N(C)[N+](=O)[O-]	1.60976	7.44919	25.0082	123.566	186.979	c1cn[nH]c1	Pyr
Cc1c(N(CCO[N+](=O)[O-])[N+](=O)[O-])c(N(C)[N+](=O)[O-])nn1CCO[N+](=O)[O-]	1.57781	7.44842	22.5476	122.999	206.882	c1cn[nH]c1	Pyr
Cn1nnc(CCO[N+](=O)[O-])c1CO[N+](=O)[O-]	1.54187	7.44738	20.2289	67.8746	178.276	c1c[nH]nn1	Tra-1
Cc1nc(N(CCO[N+](=O)[O-])[N+](=O)[O-])c(CO[N+](=O)[O-])n1CCO[N+](=O)[O-]	1.60486	7.44734	22.8726	90.9844	177.802	c1c[nH]cn1	Imi
COc1nc(N(C)[N+](=O)[O-])n(CO[N+](=O)[O-])c1N(CCO[N+](=O)[O-])[N+](=O)[O-]	1.60915	7.44583	25.2315	119.267	194.695	c1c[nH]cn1	Imi
CN(c1nc(CCO[N+](=O)[O-])nn1C)[N+](=O)[O-]	1.52869	7.44548	19.8065	82.0332	185.078	c1nc[nH]n1	Tra-4
COc1c(N(CCO[N+](=O)[O-])[N+](=O)[O-])cnn1CO[N+](=O)[O-]	1.60143	7.44545	23.2721	83.396	178.802	c1cn[nH]c1	Pyr
Cn1c(CCO[N+](=O)[O-])nnc1CO[N+](=O)[O-]	1.54351	7.44542	20.1018	67.1535	176.727	c1nnc[nH]1	Tra-3
Cc1nc(CO[N+](=O)[O-])n(CCO[N+](=O)[O-])n1	1.54672	7.44534	20.5674	62.276	174.098	c1nc[nH]n1	Tra-4
Cc1nn(CCO[N+](=O)[O-])nc1N(C)[N+](=O)[O-]	1.52066	7.44489	20.0052	82.9536	185.346	c1cn[nH]n1	Tra-2
Cc1nn(C)c(N(CCO[N+](=O)[O-])[N+](=O)[O-])c1N(CCO[N+](=O)[O-])[N+](=O)[O-]	1.57621	7.44481	23.1537	126.495	213.97	c1cn[nH]c1	Pyr
COc1nc(N(C)[N+](=O)[O-])c(N(CCO[N+](=O)[O-])[N+](=O)[O-])n1CO[N+](=O)[O-]	1.61069	7.44436	24.9892	117.378	182.658	c1c[nH]cn1	Imi
Cc1c([N+](=O)[O-])nc([N+](=O)[O-])n1C	1.57813	7.44301	21.5054	114.222	235.746	c1c[nH]cn1	Imi
COc1cn(CO[N+](=O)[O-])nc1N(CCO[N+](=O)[O-])[N+](=O)[O-]	1.60241	7.44294	23.2803	80.9166	177.151	c1cn[nH]c1	Pyr
COc1c(N(C)[N+](=O)[O-])nc(N(CCO[N+](=O)[O-])[N+](=O)[O-])n1CO[N+](=O)[O-]	1.60946	7.44273	24.8388	121.176	180.723	c1c[nH]cn1	Imi
COc1nc(N(CCO[N+](=O)[O-])[N+](=O)[O-])n(CCO[N+](=O)[O-])n1	1.59715	7.44139	23.1548	63.5066	160.371	c1nc[nH]n1	Tra-4
Cc1c(N(C)[N+](=O)[O-])nnn1CCO[N+](=O)[O-]	1.5254	7.44126	19.8967	83.5382	186.547	c1c[nH]nn1	Tra-1
Cn1c(CO[N+](=O)[O-])nc(CCO[N+](=O)[O-])c1N(CCO[N+](=O)[O-])[N+](=O)[O-]	1.60518	7.44091	22.8552	96.079	188.68	c1c[nH]cn1	Imi
COc1nnc(N(CCO[N+](=O)[O-])[N+](=O)[O-])n1CCO[N+](=O)[O-]	1.59301	7.44077	22.9271	68.4274	163.944	c1nnc[nH]1	Tra-3
O=[N+]([O-])OCCc1ncn(CCO[N+](=O)[O-])c1N(CCO[N+](=O)[O-])[N+](=O)[O-]	1.62233	7.44024	22.6838	87.9577	184.263	c1c[nH]cn1	Imi
COc1nc(N(CCO[N+](=O)[O-])[N+](=O)[O-])nn1CCO[N+](=O)[O-]	1.59107	7.4393	22.7926	72.0396	163.937	c1nc[nH]n1	Tra-4
Cn1c(CO[N+](=O)[O-])nc(N(CCO[N+](=O)[O-])[N+](=O)[O-])c1CCO[N+](=O)[O-]	1.60216	7.43923	22.6681	96.5045	187.181	c1c[nH]cn1	Imi
Cc1nc(N(CCO[N+](=O)[O-])[N+](=O)[O-])n(CCO[N+](=O)[O-])c1N(C)[N+](=O)[O-]	1.58523	7.43839	22.9804	112.039	191.65	c1c[nH]cn1	Imi
CN(c1c(CCO[N+](=O)[O-])nc(CO[N+](=O)[O-])n1CCO[N+](=O)[O-])[N+](=O)[O-]	1.61043	7.43785	22.5835	89.8927	177.662	c1c[nH]cn1	Imi
Cc1cn(CO[N+](=O)[O-])nc1CO[N+](=O)[O-]	1.55467	7.43782	20.7893	76.4842	188.94	c1cn[nH]c1	Pyr
CN(c1c(CCO[N+](=O)[O-])c(N(CCO[N+](=O)[O-])[N+](=O)[O-])nn1C)[N+](=O)[O-]	1.58053	7.43768	22.973	119.22	207.942	c1cn[nH]c1	Pyr
O=[N+]([O-])OCCc1nc(CCO[N+](=O)[O-])n(CCO[N+](=O)[O-])c1N(CCO[N+](=O)[O-])[N+](=O)[O-]	1.63813	7.43761	22.2668	106.248	191.856	c1c[nH]cn1	Imi
Cc1ncn(CO[N+](=O)[O-])n1	1.51612	7.43726	19.5701	69.6613	194.411	c1nc[nH]n1	Tra-4
COc1c(N(C)[N+](=O)[O-])nn(CO[N+](=O)[O-])c1N(CCO[N+](=O)[O-])[N+](=O)[O-]	1.6096	7.43666	24.9842	124.646	179.054	c1cn[nH]c1	Pyr
CN(c1cnc(N(C)[N+](=O)[O-])n1CCO[N+](=O)[O-])[N+](=O)[O-]	1.57041	7.43652	22.4519	129.562	197.722	c1c[nH]cn1	Imi
O=[N+]([O-])OCCc1ncn(CCO[N+](=O)[O-])n1	1.55801	7.43638	19.6146	62.8173	173.894	c1nc[nH]n1	Tra-4
Cc1nnc(CO[N+](=O)[O-])n1CCO[N+](=O)[O-]	1.54375	7.43611	20.2719	65.1555	176.409	c1nnc[nH]1	Tra-3
Cc1nn(CO[N+](=O)[O-])cc1CO[N+](=O)[O-]	1.55438	7.43505	20.7481	76.0648	189.41	c1cn[nH]c1	Pyr
COc1nc(N(CCO[N+](=O)[O-])[N+](=O)[O-])c(N(CCO[N+](=O)[O-])[N+](=O)[O-])n1CCO[N+](=O)[O-]	1.61494	7.43487	24.5659	99.2635	180.105	c1c[nH]cn1	Imi
Cc1c(CCO[N+](=O)[O-])c(N(CCO[N+](=O)[O-])[N+](=O)[O-])nn1CO[N+](=O)[O-]	1.60746	7.43469	23.0376	95.1221	178.14	c1cn[nH]c1	Pyr
COc1nn(CO[N+](=O)[O-])c(CO[N+](=O)[O-])c1CO[N+](=O)[O-]	1.62924	7.4346	24.1884	83.6814	161.031	c1cn[nH]c1	Pyr
COc1nn(CO[N+](=O)[O-])c([N+](=O)[O-])c1CCO[N+](=O)[O-]	1.62651	7.43407	23.5027	86.6566	185.117	c1cn[nH]c1	Pyr
CN(c1nn(CCO[N+](=O)[O-])c(CCO[N+](=O)[O-])c1CO[N+](=O)[O-])[N+](=O)[O-]	1.61099	7.43396	22.6007	90.989	175.809	c1cn[nH]c1	Pyr
CN(c1nc(CCO[N+](=O)[O-])c(N(CCO[N+](=O)[O-])[N+](=O)[O-])n1C)[N+](=O)[O-]	1.58062	7.43358	22.7301	118.954	204.564	c1c[nH]cn1	Imi
O=[N+]([O-])OCCc1ncnn1CCO[N+](=O)[O-]	1.55656	7.43249	19.5704	61.1558	174.94	c1nc[nH]n1	Tra-4
Cc1cc(CO[N+](=O)[O-])nn1CO[N+](=O)[O-]	1.55491	7.43221	20.7158	78.9456	189.02	c1cn[nH]c1	Pyr
Cc1nnc(CCO[N+](=O)[O-])n1CO[N+](=O)[O-]	1.54898	7.43138	20.5614	62.4508	174.623	c1nnc[nH]1	Tra-3
Cc1nc(CCO[N+](=O)[O-])n(CO[N+](=O)[O-])n1	1.54045	7.43128	20.576	69.3608	178.086	c1nc[nH]n1	Tra-4
Cc1nc(N(CCO[N+](=O)[O-])[N+](=O)[O-])n(CCO[N+](=O)[O-])c1CO[N+](=O)[O-]	1.60396	7.42943	22.9328	107.006	196.769	c1c[nH]cn1	Imi
Cc1nnc(N(CCO[N+](=O)[O-])[N+](=O)[O-])n1C	1.5194	7.4282	20.3798	79.4495	185.719	c1nnc[nH]1	Tra-3
COc1c(CCO[N+](=O)[O-])nn(CO[N+](=O)[O-])c1[N+](=O)[O-]	1.62166	7.42804	23.3098	86.4385	184.471	c1cn[nH]c1	Pyr
Cc1cn(CO[N+](=O)[O-])nn1	1.51858	7.42762	19.8897	61.4474	193.242	c1c[nH]nn1	Tra-1
COc1c(CCO[N+](=O)[O-])c([N+](=O)[O-])nn1CO[N+](=O)[O-]	1.61996	7.42756	23.0211	88.5077	184.908	c1cn[nH]c1	Pyr
O=[N+]([O-])OCCc1cn(CCO[N+](=O)[O-])nn1	1.5573	7.42755	19.6057	61.9967	174.06	c1c[nH]nn1	Tra-1
Cc1c([N+](=O)[O-])nc(N(C)[N+](=O)[O-])n1CCO[N+](=O)[O-]	1.57272	7.42748	21.9761	114.622	195.175	c1c[nH]cn1	Imi
Cc1nn(CCO[N+](=O)[O-])c(N(CCO[N+](=O)[O-])[N+](=O)[O-])c1CO[N+](=O)[O-]	1.60564	7.42682	23.092	99.5944	182.359	c1cn[nH]c1	Pyr
O=[N+]([O-])OCCc1nc([N+](=O)[O-])n(CCO[N+](=O)[O-])c1CCO[N+](=O)[O-]	1.62	7.42679	22.1087	84.2876	192.242	c1c[nH]cn1	Imi
Cc1ncnn1CO[N+](=O)[O-]	1.5202	7.42652	19.7175	62.3922	194.376	c1nc[nH]n1	Tra-4
Cc1nnn(CCO[N+](=O)[O-])c1CO[N+](=O)[O-]	1.54316	7.42631	20.6411	65.5907	174.934	c1c[nH]nn1	Tra-1
Cc1nc(N(C)[N+](=O)[O-])nn1CCO[N+](=O)[O-]	1.53224	7.42588	20.0235	76.3582	180.908	c1nc[nH]n1	Tra-4
O=[N+]([O-])OCCc1cc(N(CCO[N+](=O)[O-])[N+](=O)[O-])n(CCO[N+](=O)[O-])n1	1.62631	7.42503	22.8716	84.4259	178.645	c1cn[nH]c1	Pyr
COc1c(N(CCO[N+](=O)[O-])[N+](=O)[O-])ncn1CO[N+](=O)[O-]	1.60614	7.42448	23.2438	78.0965	176.4	c1c[nH]cn1	Imi
CN(c1nc(N(CCO[N+](=O)[O-])[N+](=O)[O-])c(CCO[N+](=O)[O-])n1C)[N+](=O)[O-]	1.57933	7.42431	22.5117	119.02	199.058	c1c[nH]cn1	Imi
Cn1ncc(CO[N+](=O)[O-])n1	1.52212	7.42389	19.4501	74.0766	197.756	c1cn[nH]n1	Tra-2
O=[N+]([O-])OCCc1ccn(CO[N+](=O)[O-])n1	1.56052	7.42379	20.0716	76.4445	178.955	c1cn[nH]c1	Pyr
Cc1c(N(CCO[N+](=O)[O-])[N+](=O)[O-])nn(CCO[N+](=O)[O-])c1CO[N+](=O)[O-]	1.60635	7.42378	22.8706	97.5137	179.02	c1cn[nH]c1	Pyr
O=[N+]([O-])OCCc1c([N+](=O)[O-])nn(CCO[N+](=O)[O-])c1CCO[N+](=O)[O-]	1.61879	7.42351	22.1224	87.1968	199.948	c1cn[nH]c1	Pyr
COc1nn(CO[N+](=O)[O-])cc1N(CCO[N+](=O)[O-])[N+](=O)[O-]	1.60573	7.42189	23.4323	81.0199	175.875	c1cn[nH]c1	Pyr
Cc1nc(N(C)[N+](=O)[O-])n(CCO[N+](=O)[O-])c1N(CCO[N+](=O)[O-])[N+](=O)[O-]	1.58323	7.42095	23.0413	115.833	199.354	c1c[nH]cn1	Imi
COc1nc(CCO[N+](=O)[O-])c([N+](=O)[O-])n1CO[N+](=O)[O-]	1.62519	7.42057	23.2682	83.4339	182.875	c1c[nH]cn1	Imi
Cc1nn(CCO[N+](=O)[O-])c(N(CCO[N+](=O)[O-])[N+](=O)[O-])c1N(C)[N+](=O)[O-]	1.57956	7.41998	22.8479	122.976	206.148	c1cn[nH]c1	Pyr
Cc1c(CO[N+](=O)[O-])ncn1CO[N+](=O)[O-]	1.55467	7.41998	20.4341	83.0295	191.312	c1c[nH]cn1	Imi
Cc1c(CO[N+](=O)[O-])cnn1CO[N+](=O)[O-]	1.56464	7.41902	20.7809	82.032	193.006	c1cn[nH]c1	Pyr
COc1nc(CO[N+](=O)[O-])n(CO[N+](=O)[O-])c1CO[N+](=O)[O-]	1.62657	7.41884	24.0284	88.2576	163.77	c1c[nH]cn1	Imi
Cc1nc(N(CCO[N+](=O)[O-])[N+](=O)[O-])c(N(C)[N+](=O)[O-])n1CCO[N+](=O)[O-]	1.57453	7.41858	22.518	142.441	224.824	c1c[nH]cn1	Imi
CN(c1nn(C)c(CCO[N+](=O)[O-])c1N(CCO[N+](=O)[O-])[N+](=O)[O-])[N+](=O)[O-]	1.58109	7.41847	22.6787	116.345	196.294	c1cn[nH]c1	Pyr
Cn1c(N(CCO[N+](=O)[O-])[N+](=O)[O-])nc(CCO[N+](=O)[O-])c1CO[N+](=O)[O-]	1.60599	7.41843	22.7542	97.1597	177.911	c1c[nH]cn1	Imi
COc1cnc(N(CCO[N+](=O)[O-])[N+](=O)[O-])n1CO[N+](=O)[O-]	1.59672	7.41819	23.4562	88.6878	181.827	c1c[nH]cn1	Imi
CN(c1nc(CO[N+](=O)[O-])c(CCO[N+](=O)[O-])n1CCO[N+](=O)[O-])[N+](=O)[O-]	1.60576	7.41654	22.3322	107.458	189.945	c1c[nH]cn1	Imi
COc1c(N(C)[N+](=O)[O-])nn(CO[N+](=O)[O-])c1CO[N+](=O)[O-]	1.59204	7.41631	23.3558	97.5193	173.801	c1cn[nH]c1	Pyr
O=[N+]([O-])OCCc1cnn(CCO[N+](=O)[O-])c1N(CCO[N+](=O)[O-])[N+](=O)[O-]	1.62301	7.41625	22.767	91.5427	186.42	c1cn[nH]c1	Pyr
O=[N+]([O-])OCCc1cnn(CO[N+](=O)[O-])c1	1.56159	7.41607	20.1482	70.7831	182.118	c1cn[nH]c1	Pyr
Cc1cnnn1CO[N+](=O)[O-]	1.51165	7.41579	19.8146	57.5736	192.209	c1c[nH]nn1	Tra-1
COc1c(CCO[N+](=O)[O-])nc([N+](=O)[O-])n1CO[N+](=O)[O-]	1.62531	7.41485	23.2704	83.0978	182.614	c1c[nH]cn1	Imi
CN(c1c(CCO[N+](=O)[O-])nc(N(CCO[N+](=O)[O-])[N+](=O)[O-])n1C)[N+](=O)[O-]	1.58204	7.41461	22.6453	119.388	194.679	c1c[nH]cn1	Imi
COc1nc(N(C)[N+](=O)[O-])no1	1.58456	7.41428	22.5791	46.2923	173.763	c1ncon1	Oxa-3
COc1nn(CO[N+](=O)[O-])c(N(C)[N+](=O)[O-])c1CO[N+](=O)[O-]	1.59802	7.41367	23.6777	88.6082	169.498	c1cn[nH]c1	Pyr
COc1c(CO[N+](=O)[O-])nn(CCO[N+](=O)[O-])c1[N+](=O)[O-]	1.61701	7.41337	23.017	91.3706	184.555	c1cn[nH]c1	Pyr
Cn1cc(CO[N+](=O)[O-])nn1	1.52568	7.41308	19.6028	65.9002	196.158	c1c[nH]nn1	Tra-1
COc1nc(CO[N+](=O)[O-])c(CO[N+](=O)[O-])n1CO[N+](=O)[O-]	1.62693	7.413	24.015	86.7469	163.782	c1c[nH]cn1	Imi
O=[N+]([O-])OCCc1nc(N(CCO[N+](=O)[O-])[N+](=O)[O-])cn1CCO[N+](=O)[O-]	1.61959	7.41287	22.3003	88.5792	183.668	c1c[nH]cn1	Imi
COc1c(CO[N+](=O)[O-])c(N(C)[N+](=O)[O-])nn1CO[N+](=O)[O-]	1.5939	7.41256	23.4142	90.4499	176.753	c1cn[nH]c1	Pyr
Cn1cnc(CO[N+](=O)[O-])n1	1.51953	7.4125	19.3552	72.2405	196.4	c1nc[nH]n1	Tra-4
O=[N+]([O-])OCCc1c(N(CCO[N+](=O)[O-])[N+](=O)[O-])ncn1CCO[N+](=O)[O-]	1.62158	7.41223	22.5101	86.4423	180.347	c1c[nH]cn1	Imi
COc1nnc(N(C)[N+](=O)[O-])o1	1.58858	7.41195	22.5497	46.3935	177.016	c1nnco1	Oxa-2
CN(c1nnc(CCO[N+](=O)[O-])n1C)[N+](=O)[O-]	1.52519	7.41191	19.9139	79.9272	183.7	c1nnc[nH]1	Tra-3
COc1cc(N(CCO[N+](=O)[O-])[N+](=O)[O-])nn1CO[N+](=O)[O-]	1.60452	7.41141	23.588	83.5044	176.404	c1cn[nH]c1	Pyr
Cc1nn(C)c([N+](=O)[O-])c1[N+](=O)[O-]	1.56135	7.41127	21.4741	107.296	229.123	c1cn[nH]c1	Pyr
Cc1nn(C)nc1N(CCO[N+](=O)[O-])[N+](=O)[O-]	1.51779	7.41088	20.4662	77.3697	174.138	c1cn[nH]n1	Tra-2
Cc1c(N(CCO[N+](=O)[O-])[N+](=O)[O-])nnn1C	1.52406	7.41079	20.5418	73.8525	177.705	c1c[nH]nn1	Tra-1
Cc1nn(CO[N+](=O)[O-])c(C)c1N(CCO[N+](=O)[O-])[N+](=O)[O-]	1.5436	7.41055	20.8953	91.8267	193	c1cn[nH]c1	Pyr
Cc1c(CCO[N+](=O)[O-])nn(CO[N+](=O)[O-])c1CO[N+](=O)[O-]	1.57223	7.41038	20.8461	83.3291	180.593	c1cn[nH]c1	Pyr
COc1nn(CCO[N+](=O)[O-])nc1N(CCO[N+](=O)[O-])[N+](=O)[O-]	1.59439	7.40969	23.1854	75.1547	160.626	c1cn[nH]n1	Tra-2
COc1onnc1N(C)[N+](=O)[O-]	1.5759	7.40966	22.569	47.1168	165.443	c1conn1	Oxa-4
CN(c1c(CCO[N+](=O)[O-])nnn1C)[N+](=O)[O-]	1.52594	7.40926	20.0837	76.1773	176.444	c1c[nH]nn1	Tra-1
Cn1nnc(CO[N+](=O)[O-])c1CCO[N+](=O)[O-]	1.54471	7.40893	20.6371	64.6823	172.403	c1c[nH]nn1	Tra-1
[truncated: 1,893 more rows]

## Sheet: pyr
SMILES	Density	Dv	P	Tm	Td
CN(c1c(CCO[N+](=O)[O-])c(CCO[N+](=O)[O-])nn1C)[N+](=O)[O-]	1.50382	7.0331	18.2088	96.5327	192.401
CN(c1c(CCO[N+](=O)[O-])c(CO[N+](=O)[O-])nn1C)[N+](=O)[O-]	1.54785	7.3102	20.7342	91.0691	187.641
CN(c1c(CCO[N+](=O)[O-])c(N(CCO[N+](=O)[O-])[N+](=O)[O-])nn1C)[N+](=O)[O-]	1.58053	7.43768	22.973	119.22	207.942
CN(c1c(CCO[N+](=O)[O-])c([N+](=O)[O-])nn1C)[N+](=O)[O-]	1.57047	7.46765	21.8724	114.662	205.178
CN(c1c(CCO[N+](=O)[O-])cnn1C)[N+](=O)[O-]	1.47939	7.02742	17.3231	82.5458	202.916
CN(c1c(CCO[N+](=O)[O-])nn(C)c1CCO[N+](=O)[O-])[N+](=O)[O-]	1.5055	7.12434	18.1006	88.3169	194.905
CN(c1c(CCO[N+](=O)[O-])nn(C)c1CO[N+](=O)[O-])[N+](=O)[O-]	1.54493	7.34099	20.4363	91.4743	190.022
CN(c1c(CCO[N+](=O)[O-])nn(C)c1N(C)[N+](=O)[O-])[N+](=O)[O-]	1.5254	7.28579	20.407	122.171	212.967
CN(c1c(CCO[N+](=O)[O-])nn(C)c1N(CCO[N+](=O)[O-])[N+](=O)[O-])[N+](=O)[O-]	1.58203	7.52771	23.0009	107.851	201.193
CN(c1c(CCO[N+](=O)[O-])nn(C)c1[N+](=O)[O-])[N+](=O)[O-]	1.58087	7.50561	22.1607	104.272	198.778
CN(c1c(CO[N+](=O)[O-])c(CCO[N+](=O)[O-])nn1C)[N+](=O)[O-]	1.54378	7.3167	20.4923	95.674	190.477
CN(c1c(CO[N+](=O)[O-])c(CO[N+](=O)[O-])nn1C)[N+](=O)[O-]	1.58792	7.59032	23.0038	96.8311	184.598
CN(c1c(CO[N+](=O)[O-])c(N(CCO[N+](=O)[O-])[N+](=O)[O-])nn1C)[N+](=O)[O-]	1.62576	7.73898	25.0609	107.352	187.333
CN(c1c(CO[N+](=O)[O-])c([N+](=O)[O-])nn1C)[N+](=O)[O-]	1.62255	7.73921	24.8397	115.941	193.749
CN(c1c(CO[N+](=O)[O-])cnn1C)[N+](=O)[O-]	1.52765	7.3324	20.1506	86.1305	194.557
CN(c1c(CO[N+](=O)[O-])nn(C)c1CCO[N+](=O)[O-])[N+](=O)[O-]	1.54645	7.35958	20.4464	89.8215	188.619
CN(c1c(CO[N+](=O)[O-])nn(C)c1CO[N+](=O)[O-])[N+](=O)[O-]	1.59558	7.6108	23.1513	89.218	179.545
CN(c1c(CO[N+](=O)[O-])nn(C)c1N(C)[N+](=O)[O-])[N+](=O)[O-]	1.57548	7.56493	22.8247	116.299	194.232
CN(c1c(CO[N+](=O)[O-])nn(C)c1N(CCO[N+](=O)[O-])[N+](=O)[O-])[N+](=O)[O-]	1.62378	7.77047	25.1157	107.33	191.87
CN(c1c(CO[N+](=O)[O-])nn(C)c1[N+](=O)[O-])[N+](=O)[O-]	1.63494	7.78625	25.0929	106.548	188.261
CN(c1c(N(CCO[N+](=O)[O-])[N+](=O)[O-])c(CCO[N+](=O)[O-])nn1C)[N+](=O)[O-]	1.58508	7.50035	22.94	104.974	196.399
CN(c1c(N(CCO[N+](=O)[O-])[N+](=O)[O-])c(CO[N+](=O)[O-])nn1C)[N+](=O)[O-]	1.62433	7.6762	25.1563	112.377	187.982
CN(c1c(N(CCO[N+](=O)[O-])[N+](=O)[O-])c(N(CCO[N+](=O)[O-])[N+](=O)[O-])nn1C)[N+](=O)[O-]	1.64885	7.75832	26.5804	148.298	213.967
CN(c1c(N(CCO[N+](=O)[O-])[N+](=O)[O-])c([N+](=O)[O-])nn1C)[N+](=O)[O-]	1.64207	7.78286	27.3454	145.962	226.898
CN(c1c(N(CCO[N+](=O)[O-])[N+](=O)[O-])cnn1C)[N+](=O)[O-]	1.58889	7.5905	23.1117	103.291	191.89
CN(c1c(N(CCO[N+](=O)[O-])[N+](=O)[O-])nn(C)c1CCO[N+](=O)[O-])[N+](=O)[O-]	1.57654	7.51193	22.8081	114.932	206.293
CN(c1c(N(CCO[N+](=O)[O-])[N+](=O)[O-])nn(C)c1CO[N+](=O)[O-])[N+](=O)[O-]	1.61851	7.70764	25.0289	118.363	200.653
CN(c1c(N(CCO[N+](=O)[O-])[N+](=O)[O-])nn(C)c1N(C)[N+](=O)[O-])[N+](=O)[O-]	1.6151	7.7291	24.9707	138.16	206.244
CN(c1c(N(CCO[N+](=O)[O-])[N+](=O)[O-])nn(C)c1N(CCO[N+](=O)[O-])[N+](=O)[O-])[N+](=O)[O-]	1.64715	7.87249	27.245	138.746	219.556
CN(c1c(N(CCO[N+](=O)[O-])[N+](=O)[O-])nn(C)c1[N+](=O)[O-])[N+](=O)[O-]	1.65742	7.91874	26.816	128.82	198.569
CN(c1c([N+](=O)[O-])c(CCO[N+](=O)[O-])nn1C)[N+](=O)[O-]	1.58238	7.55799	22.0502	107.989	199.349
CN(c1c([N+](=O)[O-])c(CO[N+](=O)[O-])nn1C)[N+](=O)[O-]	1.6372	7.82013	25.0969	107.979	189.948
CN(c1c([N+](=O)[O-])c(N(CCO[N+](=O)[O-])[N+](=O)[O-])nn1C)[N+](=O)[O-]	1.65585	7.95165	27.0103	131.153	200.581
CN(c1c([N+](=O)[O-])c([N+](=O)[O-])nn1C)[N+](=O)[O-]	1.67952	8.00499	26.9689	124.072	196.041
CN(c1c([N+](=O)[O-])cnn1C)[N+](=O)[O-]	1.56169	7.48364	21.776	100.027	205.251
CN(c1c([N+](=O)[O-])nn(C)c1CCO[N+](=O)[O-])[N+](=O)[O-]	1.58099	7.50342	22.004	103.437	196.622
CN(c1c([N+](=O)[O-])nn(C)c1CO[N+](=O)[O-])[N+](=O)[O-]	1.62396	7.75096	24.7925	111.085	193.741
CN(c1c([N+](=O)[O-])nn(C)c1N(C)[N+](=O)[O-])[N+](=O)[O-]	1.61179	7.69567	24.2502	142.86	192.153
CN(c1c([N+](=O)[O-])nn(C)c1N(CCO[N+](=O)[O-])[N+](=O)[O-])[N+](=O)[O-]	1.65623	7.86278	26.7519	130.138	194.904
CN(c1c([N+](=O)[O-])nn(C)c1[N+](=O)[O-])[N+](=O)[O-]	1.66899	7.95382	26.8477	129.163	196.701
CN(c1cc(CCO[N+](=O)[O-])n(C)n1)[N+](=O)[O-]	1.47751	7.05585	17.0585	87.6684	204.619
CN(c1cc(CCO[N+](=O)[O-])nn1C)[N+](=O)[O-]	1.48289	7.08056	17.0194	87.555	204.322
CN(c1cc(CO[N+](=O)[O-])n(C)n1)[N+](=O)[O-]	1.53992	7.36156	20.165	88.4087	196.709
CN(c1cc(CO[N+](=O)[O-])nn1C)[N+](=O)[O-]	1.53455	7.36475	20.0974	88.9644	196.307
CN(c1cc(N(C)[N+](=O)[O-])n(C)n1)[N+](=O)[O-]	1.52996	7.32969	19.9228	114.489	203.825
CN(c1cc(N(CCO[N+](=O)[O-])[N+](=O)[O-])n(C)n1)[N+](=O)[O-]	1.57294	7.53224	22.9606	120.883	205.791
CN(c1cc(N(CCO[N+](=O)[O-])[N+](=O)[O-])nn1C)[N+](=O)[O-]	1.58504	7.5857	22.9516	106.95	192.434
CN(c1cc([N+](=O)[O-])n(C)n1)[N+](=O)[O-]	1.58824	7.53009	22.1672	106.549	210.362
CN(c1cc([N+](=O)[O-])nn1C)[N+](=O)[O-]	1.57923	7.53074	21.835	109.566	211.132
CN(c1ccn(C)n1)[N+](=O)[O-]	1.42819	6.78246	14.6968	67.0933	217.066
CN(c1ccnn1C)[N+](=O)[O-]	1.4184	6.79378	14.5205	69.6204	216.289
CN(c1cn(C)nc1CCO[N+](=O)[O-])[N+](=O)[O-]	1.48595	7.03732	17.3394	79.5418	200.359
CN(c1cn(C)nc1CO[N+](=O)[O-])[N+](=O)[O-]	1.52259	7.26637	20.3277	87.5697	191.069
CN(c1cn(C)nc1N(C)[N+](=O)[O-])[N+](=O)[O-]	1.49431	7.15123	19.4089	127.568	199.646
CN(c1cn(C)nc1N(CCO[N+](=O)[O-])[N+](=O)[O-])[N+](=O)[O-]	1.58401	7.51999	23.231	104.489	189.403
CN(c1cn(C)nc1[N+](=O)[O-])[N+](=O)[O-]	1.56253	7.46316	21.8041	108.606	205.042
CN(c1cnn(C)c1)[N+](=O)[O-]	1.4355	6.79889	14.6645	69.2692	219.886
CN(c1cnn(C)c1CCO[N+](=O)[O-])[N+](=O)[O-]	1.47339	6.99583	17.2059	85.9017	203.179
CN(c1cnn(C)c1CO[N+](=O)[O-])[N+](=O)[O-]	1.5223	7.27596	20.2755	89.5362	191.998
CN(c1cnn(C)c1N(C)[N+](=O)[O-])[N+](=O)[O-]	1.50262	7.17559	19.6936	123.193	207.659
CN(c1cnn(C)c1N(CCO[N+](=O)[O-])[N+](=O)[O-])[N+](=O)[O-]	1.57218	7.5309	23.2366	121.335	209.617
CN(c1cnn(C)c1[N+](=O)[O-])[N+](=O)[O-]	1.57534	7.51244	21.9564	104.43	207.922
CN(c1nn(C)c(CCO[N+](=O)[O-])c1CCO[N+](=O)[O-])[N+](=O)[O-]	1.50113	7.019	18.1428	100.503	196.628
CN(c1nn(C)c(CCO[N+](=O)[O-])c1CO[N+](=O)[O-])[N+](=O)[O-]	1.54767	7.30191	20.6454	89.832	185.616
CN(c1nn(C)c(CCO[N+](=O)[O-])c1N(C)[N+](=O)[O-])[N+](=O)[O-]	1.52662	7.27479	20.3077	119.077	207.208
CN(c1nn(C)c(CCO[N+](=O)[O-])c1N(CCO[N+](=O)[O-])[N+](=O)[O-])[N+](=O)[O-]	1.58109	7.41847	22.6787	116.345	196.294
CN(c1nn(C)c(CCO[N+](=O)[O-])c1[N+](=O)[O-])[N+](=O)[O-]	1.58415	7.52459	22.1844	105.078	199.139
CN(c1nn(C)c(CO[N+](=O)[O-])c1CCO[N+](=O)[O-])[N+](=O)[O-]	1.5426	7.28029	20.5808	98.3753	194.281
CN(c1nn(C)c(CO[N+](=O)[O-])c1CO[N+](=O)[O-])[N+](=O)[O-]	1.58607	7.54765	23.0324	100.136	182.432
CN(c1nn(C)c(CO[N+](=O)[O-])c1N(C)[N+](=O)[O-])[N+](=O)[O-]	1.57786	7.54808	22.9817	114.083	195.173
CN(c1nn(C)c(CO[N+](=O)[O-])c1N(CCO[N+](=O)[O-])[N+](=O)[O-])[N+](=O)[O-]	1.62407	7.6798	25.1474	111.009	188.78
CN(c1nn(C)c(CO[N+](=O)[O-])c1[N+](=O)[O-])[N+](=O)[O-]	1.63108	7.81284	24.9224	108.549	191.316
CN(c1nn(C)c(N(C)[N+](=O)[O-])c1CCO[N+](=O)[O-])[N+](=O)[O-]	1.52121	7.19896	20.1721	130.604	194.698
CN(c1nn(C)c(N(C)[N+](=O)[O-])c1CO[N+](=O)[O-])[N+](=O)[O-]	1.56667	7.47508	22.7041	128.587	189.489
CN(c1nn(C)c(N(C)[N+](=O)[O-])c1N(C)[N+](=O)[O-])[N+](=O)[O-]	1.57204	7.52115	22.736	155.101	210.866
CN(c1nn(C)c(N(C)[N+](=O)[O-])c1N(CCO[N+](=O)[O-])[N+](=O)[O-])[N+](=O)[O-]	1.60981	7.6779	24.9923	146.467	210.361
CN(c1nn(C)c(N(C)[N+](=O)[O-])c1[N+](=O)[O-])[N+](=O)[O-]	1.62562	7.77658	24.7104	132.432	192.389
CN(c1nn(C)c(N(CCO[N+](=O)[O-])[N+](=O)[O-])c1CCO[N+](=O)[O-])[N+](=O)[O-]	1.58078	7.46101	22.7688	117.293	204.987
CN(c1nn(C)c(N(CCO[N+](=O)[O-])[N+](=O)[O-])c1CO[N+](=O)[O-])[N+](=O)[O-]	1.62167	7.74519	25.2022	111.226	195.894
CN(c1nn(C)c(N(CCO[N+](=O)[O-])[N+](=O)[O-])c1N(C)[N+](=O)[O-])[N+](=O)[O-]	1.60953	7.68929	24.808	146.888	209.853
CN(c1nn(C)c(N(CCO[N+](=O)[O-])[N+](=O)[O-])c1N(CCO[N+](=O)[O-])[N+](=O)[O-])[N+](=O)[O-]	1.648	7.84935	27.1686	139.872	219.499
CN(c1nn(C)c(N(CCO[N+](=O)[O-])[N+](=O)[O-])c1[N+](=O)[O-])[N+](=O)[O-]	1.65984	7.93257	26.9715	127.351	197.407
CN(c1nn(C)c([N+](=O)[O-])c1CCO[N+](=O)[O-])[N+](=O)[O-]	1.5774	7.45019	22.2418	111.853	196.565
CN(c1nn(C)c([N+](=O)[O-])c1CO[N+](=O)[O-])[N+](=O)[O-]	1.62026	7.70262	24.9649	123.934	190.864
CN(c1nn(C)c([N+](=O)[O-])c1N(C)[N+](=O)[O-])[N+](=O)[O-]	1.61337	7.70213	24.33	141.974	193.475
CN(c1nn(C)c([N+](=O)[O-])c1N(CCO[N+](=O)[O-])[N+](=O)[O-])[N+](=O)[O-]	1.66203	7.89615	27.0687	124.517	193.127
CN(c1nn(C)c([N+](=O)[O-])c1[N+](=O)[O-])[N+](=O)[O-]	1.68464	8.01304	27.1831	122.525	195.778
CN(c1nn(C)cc1CCO[N+](=O)[O-])[N+](=O)[O-]	1.46784	6.98038	17.2068	90.5856	206.319
CN(c1nn(C)cc1CO[N+](=O)[O-])[N+](=O)[O-]	1.52695	7.27089	20.4455	83.732	192.571
CN(c1nn(C)cc1N(CCO[N+](=O)[O-])[N+](=O)[O-])[N+](=O)[O-]	1.5815	7.55083	23.0545	106.246	192.329
CN(c1nn(C)cc1[N+](=O)[O-])[N+](=O)[O-]	1.55969	7.4571	21.8245	99.3181	204.709
COc1c(C)c(C)nn1C	1.15837	5.21288	1.03907	64.8412	254.87
COc1c(C)c(CCO[N+](=O)[O-])nn1C	1.34779	6.11957	9.8482	66.6962	232.653
COc1c(C)c(CO[N+](=O)[O-])nn1C	1.3919	6.35709	12.4663	70.1802	227.423
COc1c(C)c(N(C)[N+](=O)[O-])nn1C	1.3619	6.22989	11.4399	81.0015	222.035
COc1c(C)c(N(CCO[N+](=O)[O-])[N+](=O)[O-])nn1C	1.44211	6.69701	16.2291	84.9591	202.76
COc1c(C)c([N+](=O)[O-])nn1C	1.41097	6.40447	13.1453	87.8864	239.305
COc1c(C)cnn1C	1.18515	5.36479	2.67316	55.622	264.759
COc1c(C)nn(C)c1C	1.16478	5.21987	0.687958	57.221	264.538
COc1c(C)nn(C)c1CCO[N+](=O)[O-]	1.33722	6.09148	9.95665	69.7228	221.022
COc1c(C)nn(C)c1CO[N+](=O)[O-]	1.38837	6.34443	12.6103	69.7738	220.22
COc1c(C)nn(C)c1N(C)[N+](=O)[O-]	1.35743	6.21543	11.4567	85.0453	217.472
COc1c(C)nn(C)c1N(CCO[N+](=O)[O-])[N+](=O)[O-]	1.44625	6.66854	16.6506	83.9937	192.639
COc1c(C)nn(C)c1OC	1.21003	5.36348	4.96617	59.6263	213.972
COc1c(C)nn(C)c1[N+](=O)[O-]	1.40206	6.40142	13.2559	91.8	231.38
COc1c(CCO[N+](=O)[O-])c(C)nn1C	1.33957	6.09582	10.1438	67.8925	218.592
COc1c(CCO[N+](=O)[O-])c(CCO[N+](=O)[O-])nn1C	1.43404	6.5016	14.3617	73.7397	191.022
COc1c(CCO[N+](=O)[O-])c(CO[N+](=O)[O-])nn1C	1.47251	6.74372	16.6518	77.2608	187.474
COc1c(CCO[N+](=O)[O-])c(N(C)[N+](=O)[O-])nn1C	1.44069	6.64518	16.0201	93.3606	190.383
COc1c(CCO[N+](=O)[O-])c(N(CCO[N+](=O)[O-])[N+](=O)[O-])nn1C	1.50749	6.93126	18.9893	84.4765	181.505
COc1c(CCO[N+](=O)[O-])c([N+](=O)[O-])nn1C	1.50219	6.88074	17.7336	88.2815	208.889
COc1c(CCO[N+](=O)[O-])cnn1C	1.3796	6.2988	11.514	63.5139	226.067
COc1c(CCO[N+](=O)[O-])nn(C)c1C	1.34539	6.10876	9.86231	66.7033	230.385
COc1c(CCO[N+](=O)[O-])nn(C)c1CCO[N+](=O)[O-]	1.43376	6.52405	13.7703	75.6873	202.932
COc1c(CCO[N+](=O)[O-])nn(C)c1CO[N+](=O)[O-]	1.46876	6.75925	16.0032	81.5723	197.893
COc1c(CCO[N+](=O)[O-])nn(C)c1N(C)[N+](=O)[O-]	1.44663	6.70252	15.4812	86.1646	209.487
COc1c(CCO[N+](=O)[O-])nn(C)c1N(CCO[N+](=O)[O-])[N+](=O)[O-]	1.50279	6.91014	18.753	104.478	188.446
COc1c(CCO[N+](=O)[O-])nn(C)c1OC	1.36605	6.08664	11.3924	62.4336	202.165
COc1c(CCO[N+](=O)[O-])nn(C)c1[N+](=O)[O-]	1.50543	6.87983	17.6225	88.8716	215.853
COc1c(CO[N+](=O)[O-])c(C)nn1C	1.38223	6.336	12.6831	71.3001	213.77
COc1c(CO[N+](=O)[O-])c(CCO[N+](=O)[O-])nn1C	1.47361	6.71603	16.984	78.1656	182.518
COc1c(CO[N+](=O)[O-])c(CO[N+](=O)[O-])nn1C	1.515	6.97477	19.284	83.0296	182.47
COc1c(CO[N+](=O)[O-])c(N(C)[N+](=O)[O-])nn1C	1.48367	6.86457	18.7331	98.2906	184.372
COc1c(CO[N+](=O)[O-])c(N(CCO[N+](=O)[O-])[N+](=O)[O-])nn1C	1.55195	7.15783	21.3887	81.0713	174.25
COc1c(CO[N+](=O)[O-])c([N+](=O)[O-])nn1C	1.55042	7.14492	20.8554	94.5468	198.5
COc1c(CO[N+](=O)[O-])cnn1C	1.43384	6.57782	14.792	63.9069	218.672
COc1c(CO[N+](=O)[O-])nn(C)c1C	1.38311	6.33708	12.5476	71.6472	219.527
COc1c(CO[N+](=O)[O-])nn(C)c1CCO[N+](=O)[O-]	1.47057	6.73143	16.3911	79.4082	193.084
COc1c(CO[N+](=O)[O-])nn(C)c1CO[N+](=O)[O-]	1.52201	7.00638	18.8914	79.6757	189.476
COc1c(CO[N+](=O)[O-])nn(C)c1N(C)[N+](=O)[O-]	1.49367	6.94578	18.1616	88.0052	200.661
COc1c(CO[N+](=O)[O-])nn(C)c1N(CCO[N+](=O)[O-])[N+](=O)[O-]	1.54102	7.18087	20.7385	99.0807	185.109
COc1c(CO[N+](=O)[O-])nn(C)c1OC	1.41033	6.29815	14.0942	64.1466	194.457
COc1c(CO[N+](=O)[O-])nn(C)c1[N+](=O)[O-]	1.56382	7.17718	20.6409	92.6387	208.878
COc1c(N(C)[N+](=O)[O-])c(C)nn1C	1.35452	6.2135	11.3739	86.2251	214.858
COc1c(N(C)[N+](=O)[O-])c(CCO[N+](=O)[O-])nn1C	1.44861	6.66618	15.9543	83.1979	196.056
COc1c(N(C)[N+](=O)[O-])c(CO[N+](=O)[O-])nn1C	1.4869	6.90206	18.4967	92.342	187.246
COc1c(N(C)[N+](=O)[O-])c(N(C)[N+](=O)[O-])nn1C	1.46255	6.78731	17.6821	123.18	194.103
COc1c(N(C)[N+](=O)[O-])c(N(CCO[N+](=O)[O-])[N+](=O)[O-])nn1C	1.52533	7.10627	20.8048	103.643	193.412
COc1c(N(C)[N+](=O)[O-])c([N+](=O)[O-])nn1C	1.51641	7.01825	19.8781	119.402	191.413
COc1c(N(C)[N+](=O)[O-])cnn1C	1.40385	6.44549	13.8013	77.4144	217.197
COc1c(N(C)[N+](=O)[O-])nn(C)c1C	1.35595	6.21321	11.4931	86.1532	213.314
COc1c(N(C)[N+](=O)[O-])nn(C)c1CCO[N+](=O)[O-]	1.44097	6.66323	15.5793	91.4669	210.213
COc1c(N(C)[N+](=O)[O-])nn(C)c1CO[N+](=O)[O-]	1.49513	6.93373	18.2643	86.1837	198.721
COc1c(N(C)[N+](=O)[O-])nn(C)c1N(C)[N+](=O)[O-]	1.47337	6.84156	17.6473	111.861	209.632
COc1c(N(C)[N+](=O)[O-])nn(C)c1N(CCO[N+](=O)[O-])[N+](=O)[O-]	1.51957	7.10202	20.5703	114.082	198.446
COc1c(N(C)[N+](=O)[O-])nn(C)c1OC	1.3815	6.17944	13.1871	72.2908	198.557
COc1c(N(C)[N+](=O)[O-])nn(C)c1[N+](=O)[O-]	1.53807	7.07829	19.8876	104.83	206.547
COc1c(N(CCO[N+](=O)[O-])[N+](=O)[O-])c(C)nn1C	1.44638	6.67642	16.4671	82.1969	194.711
COc1c(N(CCO[N+](=O)[O-])[N+](=O)[O-])c(CCO[N+](=O)[O-])nn1C	1.50409	6.91848	18.8844	89.1892	188.594
COc1c(N(CCO[N+](=O)[O-])[N+](=O)[O-])c(CO[N+](=O)[O-])nn1C	1.54231	7.10372	21.1973	102.882	185.724
COc1c(N(CCO[N+](=O)[O-])[N+](=O)[O-])c(N(C)[N+](=O)[O-])nn1C	1.52447	7.06942	21.0289	107.569	196.884
COc1c(N(CCO[N+](=O)[O-])[N+](=O)[O-])c(N(CCO[N+](=O)[O-])[N+](=O)[O-])nn1C	1.56146	7.30195	22.9043	111.318	196.55
COc1c(N(CCO[N+](=O)[O-])[N+](=O)[O-])c([N+](=O)[O-])nn1C	1.57679	7.30357	22.6677	104.454	199.416
COc1c(N(CCO[N+](=O)[O-])[N+](=O)[O-])cnn1C	1.48978	6.88842	18.6071	83.398	190.53
COc1c(N(CCO[N+](=O)[O-])[N+](=O)[O-])nn(C)c1C	1.44093	6.66531	16.4696	86.8111	195.572
COc1c(N(CCO[N+](=O)[O-])[N+](=O)[O-])nn(C)c1CCO[N+](=O)[O-]	1.50817	6.94723	18.7237	81.0942	183.363
COc1c(N(CCO[N+](=O)[O-])[N+](=O)[O-])nn(C)c1CO[N+](=O)[O-]	1.5492	7.18407	20.9389	82.3319	180.799
COc1c(N(CCO[N+](=O)[O-])[N+](=O)[O-])nn(C)c1N(C)[N+](=O)[O-]	1.52697	7.10583	20.7728	104.546	191.084
COc1c(N(CCO[N+](=O)[O-])[N+](=O)[O-])nn(C)c1N(CCO[N+](=O)[O-])[N+](=O)[O-]	1.56713	7.3109	22.8099	99.7985	190.85
COc1c(N(CCO[N+](=O)[O-])[N+](=O)[O-])nn(C)c1OC	1.45394	6.56538	17.3697	75.7265	174.446
COc1c(N(CCO[N+](=O)[O-])[N+](=O)[O-])nn(C)c1[N+](=O)[O-]	1.59101	7.33796	22.9762	98.4347	186.769
COc1c([N+](=O)[O-])c(C)nn1C	1.39274	6.35824	13.1735	94.4794	227.499
COc1c([N+](=O)[O-])c(CCO[N+](=O)[O-])nn1C	1.51146	6.87896	17.7547	87.787	215.561
COc1c([N+](=O)[O-])c(CO[N+](=O)[O-])nn1C	1.56433	7.16422	20.9069	90.0521	203.073
COc1c([N+](=O)[O-])c(N(C)[N+](=O)[O-])nn1C	1.53278	7.04832	19.9628	103.993	199.065
COc1c([N+](=O)[O-])c(N(CCO[N+](=O)[O-])[N+](=O)[O-])nn1C	1.59073	7.32238	23.101	95.5217	184.645
COc1c([N+](=O)[O-])c([N+](=O)[O-])nn1C	1.59927	7.31448	22.9436	103.211	211.623
COc1c([N+](=O)[O-])cnn1C	1.46017	6.68038	15.938	81.8417	240.829
COc1c([N+](=O)[O-])nn(C)c1C	1.40866	6.37467	13.2954	87.2974	237.088
COc1c([N+](=O)[O-])nn(C)c1CCO[N+](=O)[O-]	1.5056	6.87769	17.3587	90.1974	217.551
COc1c([N+](=O)[O-])nn(C)c1CO[N+](=O)[O-]	1.56334	7.16301	20.5875	91.5374	207.831
COc1c([N+](=O)[O-])nn(C)c1N(C)[N+](=O)[O-]	1.53603	7.07068	19.8085	105.924	204.301
COc1c([N+](=O)[O-])nn(C)c1N(CCO[N+](=O)[O-])[N+](=O)[O-]	1.58029	7.33513	22.4454	103.685	197.361
COc1c([N+](=O)[O-])nn(C)c1OC	1.43414	6.38701	15.1742	76.3931	202.729
COc1c([N+](=O)[O-])nn(C)c1[N+](=O)[O-]	1.60979	7.35734	22.8176	103.76	217.331
COc1cc(C)n(C)n1	1.21505	5.39344	2.3469	40.2995	286.053
COc1cc(C)nn1C	1.20024	5.3826	2.50431	44.7635	273.817
COc1cc(CCO[N+](=O)[O-])n(C)n1	1.38677	6.30082	11.2893	66.3982	234.413
COc1cc(CCO[N+](=O)[O-])nn1C	1.38304	6.3001	11.4363	64.565	230.124
COc1cc(CO[N+](=O)[O-])n(C)n1	1.44239	6.58388	14.4821	69.2072	229.461
COc1cc(CO[N+](=O)[O-])nn1C	1.44276	6.58353	14.717	65.2756	225.751
COc1cc(N(C)[N+](=O)[O-])n(C)n1	1.41446	6.4796	13.6084	74.8079	228.533
COc1cc(N(C)[N+](=O)[O-])nn1C	1.41066	6.46639	13.7972	73.4014	220.284
COc1cc(N(CCO[N+](=O)[O-])[N+](=O)[O-])n(C)n1	1.48518	6.88096	18.4764	89.9201	198.355
COc1cc(N(CCO[N+](=O)[O-])[N+](=O)[O-])nn1C	1.49192	6.89379	18.6345	79.4953	194.387
COc1cc(OC)n(C)n1	1.27864	5.5727	6.52604	34.6605	251.403
COc1cc([N+](=O)[O-])n(C)n1	1.48208	6.70786	16.107	80.766	251.913
COc1cc([N+](=O)[O-])nn1C	1.47681	6.69492	16.1184	81.0952	247.673
COc1ccn(C)n1	1.26128	5.62427	4.75812	33.7003	284.874
COc1ccnn1C	1.24542	5.61464	4.89322	38.1182	277.948
COc1cn(C)nc1C	1.19437	5.36647	2.46872	47.5141	271.911
COc1cn(C)nc1CCO[N+](=O)[O-]	1.38798	6.29134	11.8714	58.9915	225.475
COc1cn(C)nc1CO[N+](=O)[O-]	1.43652	6.56915	14.9123	63.101	219.008
COc1cn(C)nc1N(C)[N+](=O)[O-]	1.39835	6.42753	13.8573	80.9692	213.319
COc1cn(C)nc1N(CCO[N+](=O)[O-])[N+](=O)[O-]	1.48527	6.86443	18.4718	86.0685	201.621
COc1cn(C)nc1OC	1.2496	5.53459	7.0527	48.1171	225.983
COc1cn(C)nc1[N+](=O)[O-]	1.45107	6.65421	16.4438	90.7772	231.217
COc1cnn(C)c1	1.2694	5.62763	4.45599	38.0222	295.393
COc1cnn(C)c1C	1.2074	5.38388	2.3006	42.305	283.114
COc1cnn(C)c1CCO[N+](=O)[O-]	1.38451	6.28927	11.7295	60.9018	225.845
COc1cnn(C)c1CO[N+](=O)[O-]	1.43602	6.57175	14.9796	63.849	217.937
COc1cnn(C)c1N(C)[N+](=O)[O-]	1.39935	6.43427	13.8248	81.6383	215.814
COc1cnn(C)c1N(CCO[N+](=O)[O-])[N+](=O)[O-]	1.49027	6.86082	18.5354	84.7566	206.708
COc1cnn(C)c1OC	1.25898	5.55051	6.90663	42.4627	233.218
COc1cnn(C)c1[N+](=O)[O-]	1.46316	6.6844	16.3923	83.8423	237.233
COc1nn(C)c(C)c1C	1.16902	5.22532	0.978702	57.6624	263.743
COc1nn(C)c(C)c1CCO[N+](=O)[O-]	1.34313	6.10294	9.81368	66.3362	228.874
COc1nn(C)c(C)c1CO[N+](=O)[O-]	1.38547	6.33827	12.6665	69.8422	215.849
COc1nn(C)c(C)c1N(C)[N+](=O)[O-]	1.35064	6.18917	11.5284	90.7377	208.594
COc1nn(C)c(C)c1N(CCO[N+](=O)[O-])[N+](=O)[O-]	1.44197	6.62516	16.4477	89.855	211.454
COc1nn(C)c(C)c1OC	1.21591	5.3573	5.1135	55.8487	216.962
COc1nn(C)c(C)c1[N+](=O)[O-]	1.38548	6.34183	13.3517	102.614	221.089
COc1nn(C)c(CCO[N+](=O)[O-])c1C	1.34532	6.11414	9.52738	69.5662	239.065
COc1nn(C)c(CCO[N+](=O)[O-])c1CCO[N+](=O)[O-]	1.42777	6.51003	14.066	82.0826	192.043
COc1nn(C)c(CCO[N+](=O)[O-])c1CO[N+](=O)[O-]	1.46715	6.70633	16.8104	87.2	182.889
COc1nn(C)c(CCO[N+](=O)[O-])c1N(C)[N+](=O)[O-]	1.44245	6.60323	16.0619	93.4584	203.566
COc1nn(C)c(CCO[N+](=O)[O-])c1N(CCO[N+](=O)[O-])[N+](=O)[O-]	1.50204	6.95021	18.6424	87.0316	189.87
COc1nn(C)c(CCO[N+](=O)[O-])c1OC	1.37078	6.07362	11.3159	62.0107	208.339
COc1nn(C)c(CCO[N+](=O)[O-])c1[N+](=O)[O-]	1.50851	6.87144	17.8068	85.9811	211.047
COc1nn(C)c(CO[N+](=O)[O-])c1C	1.39262	6.35433	12.3786	70.6107	229.911
COc1nn(C)c(CO[N+](=O)[O-])c1CCO[N+](=O)[O-]	1.46771	6.71904	16.7027	87.131	185.656
COc1nn(C)c(CO[N+](=O)[O-])c1CO[N+](=O)[O-]	1.51289	6.9497	19.7037	89.2945	174.708
COc1nn(C)c(CO[N+](=O)[O-])c1N(C)[N+](=O)[O-]	1.48404	6.85874	18.6076	98.5417	191.406
COc1nn(C)c(CO[N+](=O)[O-])c1N(CCO[N+](=O)[O-])[N+](=O)[O-]	1.54417	7.08059	21.4218	100.508	186.894
COc1nn(C)c(CO[N+](=O)[O-])c1OC	1.41713	6.30884	14.1205	61.7991	198.66
COc1nn(C)c(CO[N+](=O)[O-])c1[N+](=O)[O-]	1.56367	7.15396	20.8902	88.8484	203.912
COc1nn(C)c(N(C)[N+](=O)[O-])c1C	1.3638	6.2395	11.3538	81.1274	226.731
COc1nn(C)c(N(C)[N+](=O)[O-])c1CCO[N+](=O)[O-]	1.44058	6.65152	15.9035	94.3293	197.347
COc1nn(C)c(N(C)[N+](=O)[O-])c1CO[N+](=O)[O-]	1.48434	6.86144	18.7159	99.0683	189.102
COc1nn(C)c(N(C)[N+](=O)[O-])c1N(C)[N+](=O)[O-]	1.46423	6.77144	17.832	123.3	197.008
COc1nn(C)c(N(C)[N+](=O)[O-])c1N(CCO[N+](=O)[O-])[N+](=O)[O-]	1.52163	7.06189	20.8384	113.154	193.634
COc1nn(C)c(N(C)[N+](=O)[O-])c1OC	1.38577	6.19043	13.2718	70.0183	197.828
COc1nn(C)c(N(C)[N+](=O)[O-])c1[N+](=O)[O-]	1.53277	7.05432	19.8911	104.444	200.862
COc1nn(C)c(N(CCO[N+](=O)[O-])[N+](=O)[O-])c1C	1.44872	6.67328	16.6741	82.4562	193.642
COc1nn(C)c(N(CCO[N+](=O)[O-])[N+](=O)[O-])c1CCO[N+](=O)[O-]	1.50515	6.86505	19.2887	99.1807	177.471
COc1nn(C)c(N(CCO[N+](=O)[O-])[N+](=O)[O-])c1CO[N+](=O)[O-]	1.54583	7.14341	21.2892	90.3069	184.472
COc1nn(C)c(N(CCO[N+](=O)[O-])[N+](=O)[O-])c1N(C)[N+](=O)[O-]	1.51764	7.09033	20.6549	117.578	204.846
COc1nn(C)c(N(CCO[N+](=O)[O-])[N+](=O)[O-])c1N(CCO[N+](=O)[O-])[N+](=O)[O-]	1.56874	7.2672	23.0841	105.878	190.298
COc1nn(C)c(N(CCO[N+](=O)[O-])[N+](=O)[O-])c1OC	1.45375	6.57584	16.9812	80.2357	186.995
COc1nn(C)c(N(CCO[N+](=O)[O-])[N+](=O)[O-])c1[N+](=O)[O-]	1.58379	7.32194	22.8317	101.01	198.11
COc1nn(C)c(OC)c1C	1.23033	5.38136	4.87361	45.2687	233.1
COc1nn(C)c(OC)c1CCO[N+](=O)[O-]	1.36685	6.06955	11.6464	59.8375	197.608
COc1nn(C)c(OC)c1CO[N+](=O)[O-]	1.40901	6.29176	14.5263	61.5784	184.53
COc1nn(C)c(OC)c1N(C)[N+](=O)[O-]	1.36478	6.14596	13.3716	84.5368	179.363
COc1nn(C)c(OC)c1N(CCO[N+](=O)[O-])[N+](=O)[O-]	1.45391	6.56674	17.1108	77.0999	180.773
COc1nn(C)c(OC)c1OC	1.25838	5.4461	8.28254	44.0942	183.829
COc1nn(C)c(OC)c1[N+](=O)[O-]	1.42565	6.36662	15.2023	79.3722	196.599
COc1nn(C)c([N+](=O)[O-])c1C	1.41576	6.40845	13.3239	86.2852	240.901
COc1nn(C)c([N+](=O)[O-])c1CCO[N+](=O)[O-]	1.50878	6.88162	18.0385	86.0987	209.003
COc1nn(C)c([N+](=O)[O-])c1CO[N+](=O)[O-]	1.55925	7.14738	21.2575	91.0859	197.836
COc1nn(C)c([N+](=O)[O-])c1N(C)[N+](=O)[O-]	1.52617	7.04181	20.0671	111.07	193.054
COc1nn(C)c([N+](=O)[O-])c1N(CCO[N+](=O)[O-])[N+](=O)[O-]	1.57944	7.23736	23.2486	108.921	207.172
COc1nn(C)c([N+](=O)[O-])c1OC	1.44147	6.38564	15.4596	73.7274	205.342
COc1nn(C)c([N+](=O)[O-])c1[N+](=O)[O-]	1.60224	7.32982	22.9846	102.853	213.23
COc1nn(C)cc1C	1.19038	5.36808	2.6747	51.4377	266.562
COc1nn(C)cc1CCO[N+](=O)[O-]	1.38861	6.29406	11.7978	58.2687	225.782
COc1nn(C)cc1CO[N+](=O)[O-]	1.44463	6.56387	15.1832	60.3861	218.994
COc1nn(C)cc1N(C)[N+](=O)[O-]	1.40137	6.44261	13.824	78.4035	212.697
COc1nn(C)cc1N(CCO[N+](=O)[O-])[N+](=O)[O-]	1.49185	6.88412	18.6438	79.6875	189.982
COc1nn(C)cc1[N+](=O)[O-]	1.45538	6.65664	16.2468	85.0618	236.002
Cc1c(CCO[N+](=O)[O-])c(CCO[N+](=O)[O-])nn1C	1.41447	6.63752	13.2404	72.6845	206.915
Cc1c(CCO[N+](=O)[O-])c(CO[N+](=O)[O-])nn1C	1.44723	6.82169	15.9479	79.6496	196.556
Cc1c(CCO[N+](=O)[O-])c(N(C)[N+](=O)[O-])nn1C	1.42874	6.77636	15.1939	91.2904	201.58
Cc1c(CCO[N+](=O)[O-])c(N(CCO[N+](=O)[O-])[N+](=O)[O-])nn1C	1.49926	7.03726	18.7867	96.664	193.524
Cc1c(CCO[N+](=O)[O-])c([N+](=O)[O-])nn1C	1.47129	6.97136	16.6286	90.2968	223.415
Cc1c(CCO[N+](=O)[O-])cnn1C	1.34866	6.34558	9.61862	63.4655	241.937
Cc1c(CCO[N+](=O)[O-])nn(C)c1C	1.30201	6.16151	7.89585	67.3872	246.676
Cc1c(CCO[N+](=O)[O-])nn(C)c1CCO[N+](=O)[O-]	1.4186	6.6446	13.1526	74.3632	210.436
Cc1c(CCO[N+](=O)[O-])nn(C)c1CO[N+](=O)[O-]	1.45187	6.90916	15.2686	83.6197	209.791
Cc1c(CCO[N+](=O)[O-])nn(C)c1N(C)[N+](=O)[O-]	1.43448	6.85759	14.9889	90.5207	214.18
Cc1c(CCO[N+](=O)[O-])nn(C)c1N(CCO[N+](=O)[O-])[N+](=O)[O-]	1.50732	7.10837	18.5663	86.4973	192.129
Cc1c(CCO[N+](=O)[O-])nn(C)c1[N+](=O)[O-]	1.48874	7.01289	16.7355	94.3953	230.091
Cc1c(CO[N+](=O)[O-])c(CCO[N+](=O)[O-])nn1C	1.44739	6.82258	15.9111	79.0589	196.605
Cc1c(CO[N+](=O)[O-])c(CO[N+](=O)[O-])nn1C	1.4876	7.08077	18.3908	84.6809	194.876
Cc1c(CO[N+](=O)[O-])c(N(C)[N+](=O)[O-])nn1C	1.4668	7.00155	17.8238	98.4024	193.391
Cc1c(CO[N+](=O)[O-])c(N(CCO[N+](=O)[O-])[N+](=O)[O-])nn1C	1.54264	7.35015	20.9868	88.7299	189.426
Cc1c(CO[N+](=O)[O-])c([N+](=O)[O-])nn1C	1.51921	7.23894	19.7522	97.1284	214.116
Cc1c(CO[N+](=O)[O-])cnn1C	1.39697	6.62919	12.6822	67.1875	235.046
Cc1c(CO[N+](=O)[O-])nn(C)c1C	1.35189	6.41078	10.5953	72.0417	243.535
Cc1c(CO[N+](=O)[O-])nn(C)c1CCO[N+](=O)[O-]	1.45686	6.90246	15.39	82.4464	209.449
Cc1c(CO[N+](=O)[O-])nn(C)c1CO[N+](=O)[O-]	1.50355	7.15765	18.1392	84.2781	201.423
Cc1c(CO[N+](=O)[O-])nn(C)c1N(C)[N+](=O)[O-]	1.48246	7.11217	17.6614	93.493	207.612
Cc1c(CO[N+](=O)[O-])nn(C)c1N(CCO[N+](=O)[O-])[N+](=O)[O-]	1.53964	7.36755	20.5965	98.6938	193.705
Cc1c(CO[N+](=O)[O-])nn(C)c1[N+](=O)[O-]	1.55075	7.28814	20.1308	98.3949	222.223
Cc1c(N(C)[N+](=O)[O-])c(CCO[N+](=O)[O-])nn1C	1.43075	6.79724	15.1037	89.3561	208.667
Cc1c(N(C)[N+](=O)[O-])c(CO[N+](=O)[O-])nn1C	1.46299	6.99259	17.7078	103.311	201.378
Cc1c(N(C)[N+](=O)[O-])c(N(C)[N+](=O)[O-])nn1C	1.45291	6.90973	17.1633	128.366	207.456
Cc1c(N(C)[N+](=O)[O-])c(N(CCO[N+](=O)[O-])[N+](=O)[O-])nn1C	1.52918	7.28629	20.8877	112.081	200.682
Cc1c(N(C)[N+](=O)[O-])c([N+](=O)[O-])nn1C	1.49926	7.13423	18.8288	117.826	207.645
Cc1c(N(C)[N+](=O)[O-])cnn1C	1.36599	6.51114	11.5675	76.7515	227.904
Cc1c(N(C)[N+](=O)[O-])nn(C)c1C	1.32706	6.28794	9.58463	82.8481	234.793
Cc1c(N(C)[N+](=O)[O-])nn(C)c1CCO[N+](=O)[O-]	1.43742	6.85	14.9428	90.7098	216.61
Cc1c(N(C)[N+](=O)[O-])nn(C)c1CO[N+](=O)[O-]	1.48399	7.09961	17.7257	91.5046	205.767
Cc1c(N(C)[N+](=O)[O-])nn(C)c1N(C)[N+](=O)[O-]	1.47489	7.06368	17.3048	117.432	210.954
Cc1c(N(C)[N+](=O)[O-])nn(C)c1N(CCO[N+](=O)[O-])[N+](=O)[O-]	1.5226	7.29556	20.6359	124.671	212.646
Cc1c(N(C)[N+](=O)[O-])nn(C)c1[N+](=O)[O-]	1.5199	7.21986	18.9371	112.347	216.289
Cc1c(N(CCO[N+](=O)[O-])[N+](=O)[O-])c(CCO[N+](=O)[O-])nn1C	1.50708	7.08825	18.7253	84.2907	190.034
Cc1c(N(CCO[N+](=O)[O-])[N+](=O)[O-])c(CO[N+](=O)[O-])nn1C	1.53726	7.2567	21.0694	102.806	200.155
Cc1c(N(CCO[N+](=O)[O-])[N+](=O)[O-])c(N(C)[N+](=O)[O-])nn1C	1.53052	7.28853	20.8675	110.496	201.024
Cc1c(N(CCO[N+](=O)[O-])[N+](=O)[O-])c(N(CCO[N+](=O)[O-])[N+](=O)[O-])nn1C	1.57366	7.46092	23.064	123.016	211.396
Cc1c(N(CCO[N+](=O)[O-])[N+](=O)[O-])c([N+](=O)[O-])nn1C	1.56937	7.45925	22.5878	105.434	207.867
Cc1c(N(CCO[N+](=O)[O-])[N+](=O)[O-])cnn1C	1.48143	7.02515	17.8519	77.9612	199.13
Cc1c(N(CCO[N+](=O)[O-])[N+](=O)[O-])nn(C)c1C	1.42371	6.81821	15.6428	93.3506	215.661
Cc1c(N(CCO[N+](=O)[O-])[N+](=O)[O-])nn(C)c1CCO[N+](=O)[O-]	1.49918	7.12393	18.5686	96.7746	203.253
Cc1c(N(CCO[N+](=O)[O-])[N+](=O)[O-])nn(C)c1CO[N+](=O)[O-]	1.54968	7.38556	20.9061	87.5916	189.27
Cc1c(N(CCO[N+](=O)[O-])[N+](=O)[O-])nn(C)c1N(C)[N+](=O)[O-]	1.52189	7.31918	20.4849	123.479	209.35
Cc1c(N(CCO[N+](=O)[O-])[N+](=O)[O-])nn(C)c1N(CCO[N+](=O)[O-])[N+](=O)[O-]	1.57888	7.56816	22.9262	109.92	200.368
Cc1c(N(CCO[N+](=O)[O-])[N+](=O)[O-])nn(C)c1[N+](=O)[O-]	1.5788	7.53011	22.3573	107.399	200.136
Cc1c([N+](=O)[O-])c(CCO[N+](=O)[O-])nn1C	1.47944	6.97442	16.7552	87.0824	223.521
Cc1c([N+](=O)[O-])c(CO[N+](=O)[O-])nn1C	1.52752	7.2495	19.8524	89.02	213.029
Cc1c([N+](=O)[O-])c(N(C)[N+](=O)[O-])nn1C	1.50359	7.16378	18.8695	105.089	205.706
Cc1c([N+](=O)[O-])c(N(CCO[N+](=O)[O-])[N+](=O)[O-])nn1C	1.581	7.51165	22.6778	100.521	195.646
Cc1c([N+](=O)[O-])c([N+](=O)[O-])nn1C	1.55734	7.39487	21.3756	108.921	227.479
Cc1c([N+](=O)[O-])cnn1C	1.40659	6.65949	13.1928	74.2973	257.405
Cc1c([N+](=O)[O-])nn(C)c1C	1.35556	6.37573	10.5545	92.0784	259.486
Cc1c([N+](=O)[O-])nn(C)c1CCO[N+](=O)[O-]	1.48739	6.99933	16.5753	95.1246	230.613
Cc1c([N+](=O)[O-])nn(C)c1CO[N+](=O)[O-]	1.53259	7.28624	19.5836	95.8134	220.668
Cc1c([N+](=O)[O-])nn(C)c1N(C)[N+](=O)[O-]	1.51789	7.20938	18.8425	113.439	217.107
Cc1c([N+](=O)[O-])nn(C)c1N(CCO[N+](=O)[O-])[N+](=O)[O-]	1.57505	7.52604	22.4023	109.031	207.706
Cc1c([N+](=O)[O-])nn(C)c1[N+](=O)[O-]	1.58114	7.46219	21.5476	109.619	234.805
Cc1cc(C)n(C)n1	1.08987	5.0909	-3.40402	28.1608	302.231
Cc1cc(CCO[N+](=O)[O-])n(C)n1	1.33742	6.33039	9.53534	64.6752	238.095
Cc1cc(CCO[N+](=O)[O-])nn1C	1.34649	6.34398	9.54831	66.8621	242.685
Cc1cc(CO[N+](=O)[O-])n(C)n1	1.40109	6.61156	13.0875	60.8187	230.463
Cc1cc(CO[N+](=O)[O-])nn1C	1.3985	6.62961	12.7154	69.9014	236.056
Cc1cc(N(C)[N+](=O)[O-])n(C)n1	1.36847	6.52116	11.7797	74.9756	226.967
Cc1cc(N(C)[N+](=O)[O-])nn1C	1.37371	6.50929	11.8409	74.2857	228.434
Cc1cc(N(CCO[N+](=O)[O-])[N+](=O)[O-])n(C)n1	1.48039	7.05077	17.903	77.9218	199.646
Cc1cc(N(CCO[N+](=O)[O-])[N+](=O)[O-])nn1C	1.48337	7.03672	17.9879	76.2504	197.379
Cc1cc([N+](=O)[O-])n(C)n1	1.41341	6.66864	13.4768	81.4484	261.588
Cc1cc([N+](=O)[O-])nn1C	1.42095	6.66706	13.3814	84.6341	266.045
Cc1ccn(C)n1	1.13626	5.28977	-1.52084	19.9349	304.313
Cc1ccnn1C	1.09296	5.20888	-1.60679	30.5323	298.608
Cc1cn(C)nc1C	1.08791	5.09349	-3.33269	29.9945	301.343
Cc1cn(C)nc1CCO[N+](=O)[O-]	1.34476	6.33911	9.68785	61.1382	238.84
Cc1cn(C)nc1CO[N+](=O)[O-]	1.39649	6.62198	12.8416	63.9854	232.215
Cc1cn(C)nc1N(C)[N+](=O)[O-]	1.36628	6.49362	11.7767	74.5784	226.992
Cc1cn(C)nc1N(CCO[N+](=O)[O-])[N+](=O)[O-]	1.46236	6.97412	17.7441	91.1869	201.552
Cc1cn(C)nc1[N+](=O)[O-]	1.40793	6.64111	13.4425	81.6885	257.833
Cc1cnn(C)c1	1.14054	5.30345	-1.51802	22.1258	306.937
Cc1cnn(C)c1C	1.0787	5.07767	-3.36006	33.7324	298.718
Cc1cnn(C)c1CCO[N+](=O)[O-]	1.33519	6.32634	9.65594	59.4145	235.407
Cc1cnn(C)c1CO[N+](=O)[O-]	1.39109	6.61273	12.8935	60.6546	229.609
Cc1cnn(C)c1N(C)[N+](=O)[O-]	1.35348	6.4666	11.7139	77.7764	223.85
Cc1cnn(C)c1N(CCO[N+](=O)[O-])[N+](=O)[O-]	1.47349	7.01608	18.0044	86.6968	210.053
Cc1cnn(C)c1[N+](=O)[O-]	1.38434	6.61225	13.4449	92.4306	253.874
Cc1nn(C)c(C)c1C	1.05506	4.95986	-4.54947	48.7387	288.622
Cc1nn(C)c(C)c1CCO[N+](=O)[O-]	1.29863	6.15105	7.81854	66.9301	242.306
Cc1nn(C)c(C)c1CO[N+](=O)[O-]	1.34827	6.39261	10.553	69.2457	238.004
Cc1nn(C)c(C)c1N(C)[N+](=O)[O-]	1.31617	6.24712	9.34584	85.6136	229.842
Cc1nn(C)c(C)c1N(CCO[N+](=O)[O-])[N+](=O)[O-]	1.42553	6.82632	15.4345	92.0286	216.565
Cc1nn(C)c(C)c1[N+](=O)[O-]	1.33688	6.34069	10.3016	83.217	248.89
Cc1nn(C)c(CCO[N+](=O)[O-])c1C	1.29919	6.15512	7.88021	66.7876	242.532
Cc1nn(C)c(CCO[N+](=O)[O-])c1CCO[N+](=O)[O-]	1.40655	6.6011	13.2089	78.3013	205.373
Cc1nn(C)c(CCO[N+](=O)[O-])c1CO[N+](=O)[O-]	1.44483	6.80709	15.8312	82.2044	196.791
Cc1nn(C)c(CCO[N+](=O)[O-])c1N(C)[N+](=O)[O-]	1.42866	6.79442	15.0149	91.1953	207.968
Cc1nn(C)c(CCO[N+](=O)[O-])c1N(CCO[N+](=O)[O-])[N+](=O)[O-]	1.50399	7.10852	18.7842	87.2906	199.518
Cc1nn(C)c(CCO[N+](=O)[O-])c1[N+](=O)[O-]	1.47358	6.98075	16.5061	88.3332	224.355
Cc1nn(C)c(CO[N+](=O)[O-])c1C	1.34093	6.39233	10.631	68.9823	233.84
Cc1nn(C)c(CO[N+](=O)[O-])c1CCO[N+](=O)[O-]	1.44571	6.84289	15.6251	81.2512	202.652
Cc1nn(C)c(CO[N+](=O)[O-])c1CO[N+](=O)[O-]	1.48116	7.03639	18.6026	94.6382	190.324
Cc1nn(C)c(CO[N+](=O)[O-])c1N(C)[N+](=O)[O-]	1.46202	6.98582	17.6998	105.364	199.679
Cc1nn(C)c(CO[N+](=O)[O-])c1N(CCO[N+](=O)[O-])[N+](=O)[O-]	1.54251	7.32744	21.1282	91.4641	195.528
Cc1nn(C)c(CO[N+](=O)[O-])c1[N+](=O)[O-]	1.52535	7.2592	19.6857	89.4777	214.134
Cc1nn(C)c(N(C)[N+](=O)[O-])c1C	1.31971	6.28118	9.54415	84.1448	231.264
Cc1nn(C)c(N(C)[N+](=O)[O-])c1CCO[N+](=O)[O-]	1.42436	6.74956	15.23	98.4855	212.521
Cc1nn(C)c(N(C)[N+](=O)[O-])c1CO[N+](=O)[O-]	1.46983	7.0097	17.9115	96.8877	195.5
Cc1nn(C)c(N(C)[N+](=O)[O-])c1N(C)[N+](=O)[O-]	1.45179	6.94055	16.9946	128.735	202.731
Cc1nn(C)c(N(C)[N+](=O)[O-])c1N(CCO[N+](=O)[O-])[N+](=O)[O-]	1.52575	7.258	20.9873	119.329	211.889
Cc1nn(C)c(N(C)[N+](=O)[O-])c1[N+](=O)[O-]	1.50547	7.1826	18.8562	104.814	205.46
Cc1nn(C)c(N(CCO[N+](=O)[O-])[N+](=O)[O-])c1C	1.42245	6.82848	15.4934	95.3161	210.5
Cc1nn(C)c(N(CCO[N+](=O)[O-])[N+](=O)[O-])c1CCO[N+](=O)[O-]	1.50176	7.10079	18.7856	93.3095	203.332
Cc1nn(C)c(N(CCO[N+](=O)[O-])[N+](=O)[O-])c1CO[N+](=O)[O-]	1.53926	7.25046	21.4694	111.434	215.839
Cc1nn(C)c(N(CCO[N+](=O)[O-])[N+](=O)[O-])c1N(C)[N+](=O)[O-]	1.52418	7.28571	21.0026	121.332	216.745
Cc1nn(C)c(N(CCO[N+](=O)[O-])[N+](=O)[O-])c1N(CCO[N+](=O)[O-])[N+](=O)[O-]	1.57621	7.44481	23.1537	126.495	213.97
Cc1nn(C)c(N(CCO[N+](=O)[O-])[N+](=O)[O-])c1[N+](=O)[O-]	1.5771	7.51292	22.6342	103.653	203.274
Cc1nn(C)c([N+](=O)[O-])c1C	1.34866	6.36989	10.6411	93.178	254.639
Cc1nn(C)c([N+](=O)[O-])c1CCO[N+](=O)[O-]	1.48164	7.00459	16.7743	89.8983	226.425
Cc1nn(C)c([N+](=O)[O-])c1CO[N+](=O)[O-]	1.52738	7.26649	19.8633	92.6989	216.966
Cc1nn(C)c([N+](=O)[O-])c1N(C)[N+](=O)[O-]	1.50374	7.15545	18.915	114.705	210.033
Cc1nn(C)c([N+](=O)[O-])c1N(CCO[N+](=O)[O-])[N+](=O)[O-]	1.57594	7.48362	22.842	103.483	207.379
Cc1nn(C)c([N+](=O)[O-])c1[N+](=O)[O-]	1.56135	7.41127	21.4741	107.296	229.123
Cc1nn(C)cc1CCO[N+](=O)[O-]	1.33495	6.27539	9.84111	64.1435	238.523
Cc1nn(C)cc1CO[N+](=O)[O-]	1.39709	6.62247	12.722	65.9113	233.687
Cc1nn(C)cc1N(C)[N+](=O)[O-]	1.36011	6.48473	11.5762	75.9879	224.167
Cc1nn(C)cc1N(CCO[N+](=O)[O-])[N+](=O)[O-]	1.47335	7.00016	17.8133	81.5309	197.893
Cc1nn(C)cc1[N+](=O)[O-]	1.40284	6.64843	13.2102	72.5587	254.849
Cn1cc(CCO[N+](=O)[O-])c(CCO[N+](=O)[O-])n1	1.45816	6.83569	14.8801	66.4192	198.779
Cn1cc(CCO[N+](=O)[O-])c(CO[N+](=O)[O-])n1	1.49407	7.03742	17.8582	72.137	196.136
Cn1cc(CCO[N+](=O)[O-])c(N(CCO[N+](=O)[O-])[N+](=O)[O-])n1	1.55573	7.33446	20.7007	77.4296	183.697
Cn1cc(CCO[N+](=O)[O-])c([N+](=O)[O-])n1	1.52829	7.23891	19.1398	81.8447	219.167
Cn1cc(CCO[N+](=O)[O-])cn1	1.39426	6.57306	12.0909	53.0543	224.551
Cn1cc(CO[N+](=O)[O-])c(CCO[N+](=O)[O-])n1	1.50236	7.09731	17.6647	68.2174	193.918
Cn1cc(CO[N+](=O)[O-])c(CO[N+](=O)[O-])n1	1.55026	7.35913	20.8649	69.874	189.54
Cn1cc(CO[N+](=O)[O-])c(N(CCO[N+](=O)[O-])[N+](=O)[O-])n1	1.59775	7.58966	23.3332	82.2644	181.141
Cn1cc(CO[N+](=O)[O-])c([N+](=O)[O-])n1	1.59689	7.57031	22.8794	84.9276	211.813
Cn1cc(CO[N+](=O)[O-])cn1	1.45181	6.91916	15.5414	61.496	218.646
Cn1cc(N(CCO[N+](=O)[O-])[N+](=O)[O-])c(CCO[N+](=O)[O-])n1	1.56125	7.33774	20.7133	75.7898	182.8
Cn1cc(N(CCO[N+](=O)[O-])[N+](=O)[O-])c(CO[N+](=O)[O-])n1	1.58706	7.4795	23.399	108.844	209.243
Cn1cc(N(CCO[N+](=O)[O-])[N+](=O)[O-])c(N(CCO[N+](=O)[O-])[N+](=O)[O-])n1	1.62546	7.69231	25.3862	122.426	208.654
Cn1cc(N(CCO[N+](=O)[O-])[N+](=O)[O-])c([N+](=O)[O-])n1	1.62764	7.78062	25.0062	101.281	197.795
Cn1cc(N(CCO[N+](=O)[O-])[N+](=O)[O-])cn1	1.54557	7.31681	20.4377	70.9608	190.187
Cn1cc([N+](=O)[O-])c(CCO[N+](=O)[O-])n1	1.54567	7.22707	19.6302	79.8947	219.224
Cn1cc([N+](=O)[O-])c(CO[N+](=O)[O-])n1	1.59108	7.5569	22.8621	81.599	211.452
Cn1cc([N+](=O)[O-])c(N(CCO[N+](=O)[O-])[N+](=O)[O-])n1	1.63949	7.79714	25.2304	96.0158	191.619
Cn1cc([N+](=O)[O-])c([N+](=O)[O-])n1	1.6318	7.76869	25.1558	99.5379	231.098
Cn1cc([N+](=O)[O-])cn1	1.49366	7.04723	16.9328	74.5082	255.36
Cn1ccc(CCO[N+](=O)[O-])n1	1.39141	6.57116	12.0823	52.7647	222.537
Cn1ccc(CO[N+](=O)[O-])n1	1.45937	6.9185	15.5712	68.6121	219.63
Cn1ccc(N(CCO[N+](=O)[O-])[N+](=O)[O-])n1	1.5331	7.28346	20.4106	72.4189	190.248
Cn1ccc([N+](=O)[O-])n1	1.49793	7.031	17.0873	78.3956	259.337
Cn1nc(CCO[N+](=O)[O-])c(CCO[N+](=O)[O-])c1CCO[N+](=O)[O-]	1.5003	6.89601	16.3064	73.7663	184.303
Cn1nc(CCO[N+](=O)[O-])c(CCO[N+](=O)[O-])c1CO[N+](=O)[O-]	1.53387	7.13046	18.4892	77.5555	182.524
Cn1nc(CCO[N+](=O)[O-])c(CCO[N+](=O)[O-])c1N(CCO[N+](=O)[O-])[N+](=O)[O-]	1.56617	7.33399	20.8679	97.1723	195.058
Cn1nc(CCO[N+](=O)[O-])c(CCO[N+](=O)[O-])c1[N+](=O)[O-]	1.55679	7.2348	20.1143	90.614	203.138
Cn1nc(CCO[N+](=O)[O-])c(CO[N+](=O)[O-])c1CCO[N+](=O)[O-]	1.53209	7.14131	18.29	78.825	182.073
Cn1nc(CCO[N+](=O)[O-])c(CO[N+](=O)[O-])c1CO[N+](=O)[O-]	1.57518	7.36225	20.8651	77.8091	175.419
Cn1nc(CCO[N+](=O)[O-])c(CO[N+](=O)[O-])c1N(CCO[N+](=O)[O-])[N+](=O)[O-]	1.59971	7.53039	22.8528	103.422	195.185
Cn1nc(CCO[N+](=O)[O-])c(CO[N+](=O)[O-])c1[N+](=O)[O-]	1.60421	7.54321	22.6529	89.8939	197.77
Cn1nc(CCO[N+](=O)[O-])c(N(CCO[N+](=O)[O-])[N+](=O)[O-])c1CCO[N+](=O)[O-]	1.56956	7.27112	20.7134	90.1484	187.496
Cn1nc(CCO[N+](=O)[O-])c(N(CCO[N+](=O)[O-])[N+](=O)[O-])c1CO[N+](=O)[O-]	1.60467	7.53533	22.9841	85.1827	179.914
Cn1nc(CCO[N+](=O)[O-])c(N(CCO[N+](=O)[O-])[N+](=O)[O-])c1N(CCO[N+](=O)[O-])[N+](=O)[O-]	1.63368	7.642	25.0145	106.289	197.362
Cn1nc(CCO[N+](=O)[O-])c(N(CCO[N+](=O)[O-])[N+](=O)[O-])c1[N+](=O)[O-]	1.62961	7.61171	24.5667	106.561	201.135
Cn1nc(CCO[N+](=O)[O-])c([N+](=O)[O-])c1CCO[N+](=O)[O-]	1.55758	7.31948	19.8024	91.507	201.573
Cn1nc(CCO[N+](=O)[O-])c([N+](=O)[O-])c1CO[N+](=O)[O-]	1.61101	7.57197	22.6655	92.7261	194.321
Cn1nc(CCO[N+](=O)[O-])c([N+](=O)[O-])c1N(CCO[N+](=O)[O-])[N+](=O)[O-]	1.63255	7.70175	24.5102	101.855	195.615
Cn1nc(CCO[N+](=O)[O-])c([N+](=O)[O-])c1[N+](=O)[O-]	1.63823	7.75403	24.5111	100.972	214.281
Cn1nc(CCO[N+](=O)[O-])cc1CCO[N+](=O)[O-]	1.45962	6.83864	14.6039	75.2252	202.374
Cn1nc(CCO[N+](=O)[O-])cc1CO[N+](=O)[O-]	1.50558	7.11135	17.4869	75.1044	195.956
Cn1nc(CCO[N+](=O)[O-])cc1N(CCO[N+](=O)[O-])[N+](=O)[O-]	1.55391	7.34086	20.6618	82.3705	187.29
Cn1nc(CCO[N+](=O)[O-])cc1[N+](=O)[O-]	1.54156	7.28042	19.1011	96.5748	225.069
Cn1nc(CO[N+](=O)[O-])c(CCO[N+](=O)[O-])c1CCO[N+](=O)[O-]	1.53366	7.09571	18.538	79.0014	181.13
Cn1nc(CO[N+](=O)[O-])c(CCO[N+](=O)[O-])c1CO[N+](=O)[O-]	1.56924	7.30109	20.9215	90.2091	183.833
Cn1nc(CO[N+](=O)[O-])c(CCO[N+](=O)[O-])c1N(CCO[N+](=O)[O-])[N+](=O)[O-]	1.60685	7.51115	23.0346	89.4908	183.82
Cn1nc(CO[N+](=O)[O-])c(CCO[N+](=O)[O-])c1[N+](=O)[O-]	1.60322	7.54455	22.7829	88.5325	200.594
Cn1nc(CO[N+](=O)[O-])c(CO[N+](=O)[O-])c1CCO[N+](=O)[O-]	1.57379	7.34087	20.9174	79.3873	176.031
Cn1nc(CO[N+](=O)[O-])c(CO[N+](=O)[O-])c1CO[N+](=O)[O-]	1.61635	7.58974	23.5438	83.3104	172.982
Cn1nc(CO[N+](=O)[O-])c(CO[N+](=O)[O-])c1N(CCO[N+](=O)[O-])[N+](=O)[O-]	1.64634	7.71582	25.2647	91.5743	178.079
Cn1nc(CO[N+](=O)[O-])c(CO[N+](=O)[O-])c1[N+](=O)[O-]	1.64793	7.77653	25.5688	102.815	197.9
Cn1nc(CO[N+](=O)[O-])c(N(CCO[N+](=O)[O-])[N+](=O)[O-])c1CCO[N+](=O)[O-]	1.60328	7.47088	22.5727	100.088	189.106
Cn1nc(CO[N+](=O)[O-])c(N(CCO[N+](=O)[O-])[N+](=O)[O-])c1CO[N+](=O)[O-]	1.64387	7.67898	25.2162	95.015	181.601
Cn1nc(CO[N+](=O)[O-])c(N(CCO[N+](=O)[O-])[N+](=O)[O-])c1N(CCO[N+](=O)[O-])[N+](=O)[O-]	1.66936	7.79227	26.7732	119.23	200.665
Cn1nc(CO[N+](=O)[O-])c(N(CCO[N+](=O)[O-])[N+](=O)[O-])c1[N+](=O)[O-]	1.6749	7.92146	27.124	101.984	192.273
Cn1nc(CO[N+](=O)[O-])c([N+](=O)[O-])c1CCO[N+](=O)[O-]	1.60603	7.57326	22.4659	95.2291	195.482
Cn1nc(CO[N+](=O)[O-])c([N+](=O)[O-])c1CO[N+](=O)[O-]	1.65777	7.8623	25.4292	95.0687	186.772
Cn1nc(CO[N+](=O)[O-])c([N+](=O)[O-])c1N(CCO[N+](=O)[O-])[N+](=O)[O-]	1.68333	8.00333	27.2127	100.487	180.196
Cn1nc(CO[N+](=O)[O-])c([N+](=O)[O-])c1[N+](=O)[O-]	1.70722	8.07419	28.0482	101.412	202.259
Cn1nc(CO[N+](=O)[O-])cc1CCO[N+](=O)[O-]	1.50414	7.102	17.4618	72.3622	195.261
Cn1nc(CO[N+](=O)[O-])cc1CO[N+](=O)[O-]	1.5533	7.40583	20.5638	74.4462	188.567
Cn1nc(CO[N+](=O)[O-])cc1N(CCO[N+](=O)[O-])[N+](=O)[O-]	1.60106	7.55864	23.2719	84.0121	181.03
Cn1nc(CO[N+](=O)[O-])cc1[N+](=O)[O-]	1.59657	7.61122	22.621	96.0788	215.709
Cn1nc(N(CCO[N+](=O)[O-])[N+](=O)[O-])c(CCO[N+](=O)[O-])c1CCO[N+](=O)[O-]	1.5685	7.26554	20.5751	98.0301	193.605
Cn1nc(N(CCO[N+](=O)[O-])[N+](=O)[O-])c(CCO[N+](=O)[O-])c1CO[N+](=O)[O-]	1.60624	7.45858	22.7817	93.4987	181.369
Cn1nc(N(CCO[N+](=O)[O-])[N+](=O)[O-])c(CCO[N+](=O)[O-])c1N(CCO[N+](=O)[O-])[N+](=O)[O-]	1.63757	7.60613	24.966	105.33	193.32
Cn1nc(N(CCO[N+](=O)[O-])[N+](=O)[O-])c(CCO[N+](=O)[O-])c1[N+](=O)[O-]	1.63589	7.69629	24.6384	98.1934	192.169
Cn1nc(N(CCO[N+](=O)[O-])[N+](=O)[O-])c(CO[N+](=O)[O-])c1CCO[N+](=O)[O-]	1.60458	7.4966	22.8372	91.2072	183.671
Cn1nc(N(CCO[N+](=O)[O-])[N+](=O)[O-])c(CO[N+](=O)[O-])c1CO[N+](=O)[O-]	1.6459	7.71694	25.229	88.5283	175.548
Cn1nc(N(CCO[N+](=O)[O-])[N+](=O)[O-])c(CO[N+](=O)[O-])c1N(CCO[N+](=O)[O-])[N+](=O)[O-]	1.66957	7.75597	26.5891	132.738	207.832
Cn1nc(N(CCO[N+](=O)[O-])[N+](=O)[O-])c(CO[N+](=O)[O-])c1[N+](=O)[O-]	1.675	7.94179	27.1791	103.348	192.139
Cn1nc(N(CCO[N+](=O)[O-])[N+](=O)[O-])c(N(CCO[N+](=O)[O-])[N+](=O)[O-])c1CCO[N+](=O)[O-]	1.62751	7.63929	25.2011	116.817	207.025
Cn1nc(N(CCO[N+](=O)[O-])[N+](=O)[O-])c(N(CCO[N+](=O)[O-])[N+](=O)[O-])c1CO[N+](=O)[O-]	1.67073	7.85762	26.8456	102.445	185.513
Cn1nc(N(CCO[N+](=O)[O-])[N+](=O)[O-])c(N(CCO[N+](=O)[O-])[N+](=O)[O-])c1N(CCO[N+](=O)[O-])[N+](=O)[O-]	1.69579	7.86519	28.5453	143.323	216.425
Cn1nc(N(CCO[N+](=O)[O-])[N+](=O)[O-])c(N(CCO[N+](=O)[O-])[N+](=O)[O-])c1[N+](=O)[O-]	1.70081	7.99278	28.7063	120.471	193.396
Cn1nc(N(CCO[N+](=O)[O-])[N+](=O)[O-])c([N+](=O)[O-])c1CCO[N+](=O)[O-]	1.63382	7.68326	24.5416	99.0049	191.265
Cn1nc(N(CCO[N+](=O)[O-])[N+](=O)[O-])c([N+](=O)[O-])c1CO[N+](=O)[O-]	1.68327	7.97256	27.105	97.6507	179.506
Cn1nc(N(CCO[N+](=O)[O-])[N+](=O)[O-])c([N+](=O)[O-])c1N(CCO[N+](=O)[O-])[N+](=O)[O-]	1.69722	8.10356	28.5567	122.173	194.924
Cn1nc(N(CCO[N+](=O)[O-])[N+](=O)[O-])c([N+](=O)[O-])c1[N+](=O)[O-]	1.71628	8.2056	29.0874	117.275	193.202
Cn1nc(N(CCO[N+](=O)[O-])[N+](=O)[O-])cc1CCO[N+](=O)[O-]	1.555	7.34806	20.4705	80.9412	185.138
Cn1nc(N(CCO[N+](=O)[O-])[N+](=O)[O-])cc1CO[N+](=O)[O-]	1.5949	7.59399	23.1124	87.9806	185.252
Cn1nc(N(CCO[N+](=O)[O-])[N+](=O)[O-])cc1N(CCO[N+](=O)[O-])[N+](=O)[O-]	1.64293	7.74744	25.3048	97.9168	185.008
Cn1nc(N(CCO[N+](=O)[O-])[N+](=O)[O-])cc1[N+](=O)[O-]	1.64838	7.79727	25.3805	97.9205	194.566
Cn1nc([N+](=O)[O-])c(CCO[N+](=O)[O-])c1CCO[N+](=O)[O-]	1.55289	7.28802	19.6896	86.8814	203.605
Cn1nc([N+](=O)[O-])c(CCO[N+](=O)[O-])c1CO[N+](=O)[O-]	1.59532	7.51452	22.3446	95.4376	204.494
Cn1nc([N+](=O)[O-])c(CCO[N+](=O)[O-])c1N(CCO[N+](=O)[O-])[N+](=O)[O-]	1.62991	7.60696	24.6271	106.943	196.939
Cn1nc([N+](=O)[O-])c(CCO[N+](=O)[O-])c1[N+](=O)[O-]	1.64433	7.74711	24.7046	98.3479	211.775
Cn1nc([N+](=O)[O-])c(CO[N+](=O)[O-])c1CCO[N+](=O)[O-]	1.59901	7.53696	22.3949	89.5746	197.901
Cn1nc([N+](=O)[O-])c(CO[N+](=O)[O-])c1CO[N+](=O)[O-]	1.65072	7.81397	25.4004	92.3584	191.954
Cn1nc([N+](=O)[O-])c(CO[N+](=O)[O-])c1N(CCO[N+](=O)[O-])[N+](=O)[O-]	1.67474	7.94192	27.155	99.5618	188.157
Cn1nc([N+](=O)[O-])c(CO[N+](=O)[O-])c1[N+](=O)[O-]	1.69961	8.03647	28.0614	102.881	204.506
Cn1nc([N+](=O)[O-])c(N(CCO[N+](=O)[O-])[N+](=O)[O-])c1CCO[N+](=O)[O-]	1.62435	7.6636	24.3823	101.748	198.48
Cn1nc([N+](=O)[O-])c(N(CCO[N+](=O)[O-])[N+](=O)[O-])c1CO[N+](=O)[O-]	1.66944	7.86943	26.8495	108.148	194.455
Cn1nc([N+](=O)[O-])c(N(CCO[N+](=O)[O-])[N+](=O)[O-])c1N(CCO[N+](=O)[O-])[N+](=O)[O-]	1.69153	8.00608	28.6387	123.805	203.003
Cn1nc([N+](=O)[O-])c(N(CCO[N+](=O)[O-])[N+](=O)[O-])c1[N+](=O)[O-]	1.71466	8.21069	29.2334	105.555	197.348
Cn1nc([N+](=O)[O-])c([N+](=O)[O-])c1CCO[N+](=O)[O-]	1.63538	7.72853	24.3655	97.6607	212.693
Cn1nc([N+](=O)[O-])c([N+](=O)[O-])c1CO[N+](=O)[O-]	1.70434	8.07093	27.819	103.782	201.281
Cn1nc([N+](=O)[O-])c([N+](=O)[O-])c1N(CCO[N+](=O)[O-])[N+](=O)[O-]	1.71065	8.165	29.0743	115.793	196.604
Cn1nc([N+](=O)[O-])c([N+](=O)[O-])c1[N+](=O)[O-]	1.75989	8.32971	30.5969	109.334	212.287
Cn1nc([N+](=O)[O-])cc1CCO[N+](=O)[O-]	1.52781	7.25767	18.8116	94.338	222.824
Cn1nc([N+](=O)[O-])cc1CO[N+](=O)[O-]	1.61104	7.58248	23.0423	90.5941	215.547
Cn1nc([N+](=O)[O-])cc1N(CCO[N+](=O)[O-])[N+](=O)[O-]	1.63324	7.8149	24.7762	104.978	197.981
Cn1nc([N+](=O)[O-])cc1[N+](=O)[O-]	1.6658	7.84852	25.5031	107.723	236.562
Cn1ncc(CCO[N+](=O)[O-])c1CCO[N+](=O)[O-]	1.44944	6.8166	14.789	71.2838	202.822
Cn1ncc(CCO[N+](=O)[O-])c1CO[N+](=O)[O-]	1.49859	7.0614	17.7963	69.1743	196.181
Cn1ncc(CCO[N+](=O)[O-])c1N(CCO[N+](=O)[O-])[N+](=O)[O-]	1.54989	7.25972	20.7056	91.4239	194.057
Cn1ncc(CCO[N+](=O)[O-])c1[N+](=O)[O-]	1.52987	7.25278	19.2097	84.9356	222.386
Cn1ncc(CO[N+](=O)[O-])c1CCO[N+](=O)[O-]	1.49812	7.11089	17.4495	71.9909	195.661
Cn1ncc(CO[N+](=O)[O-])c1CO[N+](=O)[O-]	1.54345	7.31826	20.9997	77.9895	192.47
Cn1ncc(CO[N+](=O)[O-])c1N(CCO[N+](=O)[O-])[N+](=O)[O-]	1.59365	7.59141	23.2424	89.3096	187.856
Cn1ncc(CO[N+](=O)[O-])c1[N+](=O)[O-]	1.61275	7.58894	23.2714	87.3886	214.559
Cn1ncc(N(CCO[N+](=O)[O-])[N+](=O)[O-])c1CCO[N+](=O)[O-]	1.5473	7.2773	20.6591	92.679	199.208
Cn1ncc(N(CCO[N+](=O)[O-])[N+](=O)[O-])c1CO[N+](=O)[O-]	1.60429	7.60703	23.2605	80.9021	179.987
Cn1ncc(N(CCO[N+](=O)[O-])[N+](=O)[O-])c1N(CCO[N+](=O)[O-])[N+](=O)[O-]	1.63184	7.65325	25.3167	117.442	201.37
Cn1ncc(N(CCO[N+](=O)[O-])[N+](=O)[O-])c1[N+](=O)[O-]	1.62872	7.74762	25.0855	105.419	204.822
Cn1ncc([N+](=O)[O-])c1CCO[N+](=O)[O-]	1.53739	7.24789	19.3154	81.1836	218.771
Cn1ncc([N+](=O)[O-])c1CO[N+](=O)[O-]	1.58412	7.55438	22.6156	84.6791	215.615
Cn1ncc([N+](=O)[O-])c1N(CCO[N+](=O)[O-])[N+](=O)[O-]	1.63247	7.78098	25.3732	104.428	201.497
Cn1ncc([N+](=O)[O-])c1[N+](=O)[O-]	1.64184	7.8056	25.2415	98.158	233.219
Cn1nccc1CCO[N+](=O)[O-]	1.39583	6.58033	11.8946	61.4218	225.661
Cn1nccc1CO[N+](=O)[O-]	1.45704	6.91202	15.6751	61.1541	219.591
Cn1nccc1N(CCO[N+](=O)[O-])[N+](=O)[O-]	1.52741	7.33294	20.1	81.459	193.116
Cn1nccc1[N+](=O)[O-]	1.47983	7.01907	17.2228	74.0234	257.976
CN(c1c(CCO[N+](=O)[O-])c(CCO[N+](=O)[O-])nn1CO[N+](=O)[O-])[N+](=O)[O-]	1.61004	7.48693	22.6253	99.7135	188.243
CN(c1c(CCO[N+](=O)[O-])c(CO[N+](=O)[O-])nn1CO[N+](=O)[O-])[N+](=O)[O-]	1.64738	7.72972	25.013	101.284	188.782
CN(c1c(CCO[N+](=O)[O-])c(N(CCO[N+](=O)[O-])[N+](=O)[O-])nn1CO[N+](=O)[O-])[N+](=O)[O-]	1.67331	7.87745	26.8473	108.782	192.41
CN(c1c(CCO[N+](=O)[O-])c([N+](=O)[O-])nn1CO[N+](=O)[O-])[N+](=O)[O-]	1.67642	7.94197	27.0101	103.683	193.412
CN(c1c(CCO[N+](=O)[O-])cnn1CO[N+](=O)[O-])[N+](=O)[O-]	1.59721	7.63015	23.0428	90.7372	185.206
CN(c1c(CCO[N+](=O)[O-])nn(CO[N+](=O)[O-])c1CCO[N+](=O)[O-])[N+](=O)[O-]	1.60791	7.45692	22.689	107.666	200.096
CN(c1c(CCO[N+](=O)[O-])nn(CO[N+](=O)[O-])c1CO[N+](=O)[O-])[N+](=O)[O-]	1.64868	7.71137	25.1271	93.7243	181.572
CN(c1c(CCO[N+](=O)[O-])nn(CO[N+](=O)[O-])c1N(C)[N+](=O)[O-])[N+](=O)[O-]	1.63015	7.7356	24.8645	108.822	185.179
CN(c1c(CCO[N+](=O)[O-])nn(CO[N+](=O)[O-])c1N(CCO[N+](=O)[O-])[N+](=O)[O-])[N+](=O)[O-]	1.6766	7.82663	26.8498	108.739	189.035
CN(c1c(CCO[N+](=O)[O-])nn(CO[N+](=O)[O-])c1[N+](=O)[O-])[N+](=O)[O-]	1.67935	7.9191	26.8721	109.315	192.08
CN(c1c(CO[N+](=O)[O-])c(CCO[N+](=O)[O-])nn1CO[N+](=O)[O-])[N+](=O)[O-]	1.65028	7.73011	24.8936	93.0091	175.367
CN(c1c(CO[N+](=O)[O-])c(CO[N+](=O)[O-])nn1CO[N+](=O)[O-])[N+](=O)[O-]	1.69093	7.98462	27.1888	101.181	174.766
CN(c1c(CO[N+](=O)[O-])c(N(CCO[N+](=O)[O-])[N+](=O)[O-])nn1CO[N+](=O)[O-])[N+](=O)[O-]	1.71243	8.03996	28.7377	116.214	189.764
CN(c1c(CO[N+](=O)[O-])c([N+](=O)[O-])nn1CO[N+](=O)[O-])[N+](=O)[O-]	1.7336	8.24339	29.6686	101.452	175.164
CN(c1c(CO[N+](=O)[O-])cnn1CO[N+](=O)[O-])[N+](=O)[O-]	1.64947	7.91901	25.742	90.1064	177.423
CN(c1c(CO[N+](=O)[O-])nn(CO[N+](=O)[O-])c1CCO[N+](=O)[O-])[N+](=O)[O-]	1.64944	7.72706	24.9368	91.2105	176.516
CN(c1c(CO[N+](=O)[O-])nn(CO[N+](=O)[O-])c1CO[N+](=O)[O-])[N+](=O)[O-]	1.69242	7.99283	27.3171	94.0214	169.886
CN(c1c(CO[N+](=O)[O-])nn(CO[N+](=O)[O-])c1N(C)[N+](=O)[O-])[N+](=O)[O-]	1.67173	7.95901	27.3002	113.798	181.446
CN(c1c(CO[N+](=O)[O-])nn(CO[N+](=O)[O-])c1N(CCO[N+](=O)[O-])[N+](=O)[O-])[N+](=O)[O-]	1.71085	7.96179	28.4985	128.186	188.009
CN(c1c(CO[N+](=O)[O-])nn(CO[N+](=O)[O-])c1[N+](=O)[O-])[N+](=O)[O-]	1.72907	8.18019	29.6614	110.18	182.72
CN(c1c(N(CCO[N+](=O)[O-])[N+](=O)[O-])c(CCO[N+](=O)[O-])nn1CO[N+](=O)[O-])[N+](=O)[O-]	1.67612	7.79515	26.5192	113.596	188.436
CN(c1c(N(CCO[N+](=O)[O-])[N+](=O)[O-])c(CO[N+](=O)[O-])nn1CO[N+](=O)[O-])[N+](=O)[O-]	1.7158	8.07092	28.917	105.694	179.739
CN(c1c(N(CCO[N+](=O)[O-])[N+](=O)[O-])c(N(CCO[N+](=O)[O-])[N+](=O)[O-])nn1CO[N+](=O)[O-])[N+](=O)[O-]	1.73817	8.0791	30.2751	136.204	197.622
CN(c1c(N(CCO[N+](=O)[O-])[N+](=O)[O-])c([N+](=O)[O-])nn1CO[N+](=O)[O-])[N+](=O)[O-]	1.73316	8.25467	31.1315	130.042	205.08
CN(c1c(N(CCO[N+](=O)[O-])[N+](=O)[O-])cnn1CO[N+](=O)[O-])[N+](=O)[O-]	1.67778	8.01042	27.6425	114.39	194.705
CN(c1c(N(CCO[N+](=O)[O-])[N+](=O)[O-])nn(CO[N+](=O)[O-])c1CCO[N+](=O)[O-])[N+](=O)[O-]	1.67592	7.76352	26.5789	114.965	185.568
CN(c1c(N(CCO[N+](=O)[O-])[N+](=O)[O-])nn(CO[N+](=O)[O-])c1CO[N+](=O)[O-])[N+](=O)[O-]	1.71123	8.08845	28.9545	109.281	186.667
CN(c1c(N(CCO[N+](=O)[O-])[N+](=O)[O-])nn(CO[N+](=O)[O-])c1N(C)[N+](=O)[O-])[N+](=O)[O-]	1.6882	8.00309	28.7914	160.81	226.398
CN(c1c(N(CCO[N+](=O)[O-])[N+](=O)[O-])nn(CO[N+](=O)[O-])c1N(CCO[N+](=O)[O-])[N+](=O)[O-])[N+](=O)[O-]	1.73462	8.06015	30.2034	148.321	213.031
CN(c1c(N(CCO[N+](=O)[O-])[N+](=O)[O-])nn(CO[N+](=O)[O-])c1[N+](=O)[O-])[N+](=O)[O-]	1.74744	8.252	30.6789	128.273	188.349
CN(c1c([N+](=O)[O-])c(CCO[N+](=O)[O-])nn1CO[N+](=O)[O-])[N+](=O)[O-]	1.68855	7.97912	27.0068	98.2663	180.325
CN(c1c([N+](=O)[O-])c(CO[N+](=O)[O-])nn1CO[N+](=O)[O-])[N+](=O)[O-]	1.73472	8.24511	29.547	103.152	176.106
CN(c1c([N+](=O)[O-])c(N(CCO[N+](=O)[O-])[N+](=O)[O-])nn1CO[N+](=O)[O-])[N+](=O)[O-]	1.74823	8.34358	30.6621	124.01	187.348
CN(c1c([N+](=O)[O-])c([N+](=O)[O-])nn1CO[N+](=O)[O-])[N+](=O)[O-]	1.78034	8.47658	31.9405	115.161	180.377
CN(c1c([N+](=O)[O-])cnn1CO[N+](=O)[O-])[N+](=O)[O-]	1.7041	8.15175	28.2413	100.144	184.58
CN(c1c([N+](=O)[O-])nn(CO[N+](=O)[O-])c1CCO[N+](=O)[O-])[N+](=O)[O-]	1.67692	7.92679	26.5992	106.621	187.992
CN(c1c([N+](=O)[O-])nn(CO[N+](=O)[O-])c1CO[N+](=O)[O-])[N+](=O)[O-]	1.72813	8.21377	29.4445	105.241	178.51
CN(c1c([N+](=O)[O-])nn(CO[N+](=O)[O-])c1N(C)[N+](=O)[O-])[N+](=O)[O-]	1.70342	8.1534	29.0743	139.062	195.742
CN(c1c([N+](=O)[O-])nn(CO[N+](=O)[O-])c1N(CCO[N+](=O)[O-])[N+](=O)[O-])[N+](=O)[O-]	1.73828	8.25003	30.8143	130.178	202.174
CN(c1c([N+](=O)[O-])nn(CO[N+](=O)[O-])c1[N+](=O)[O-])[N+](=O)[O-]	1.77799	8.50972	31.8297	118.069	185.695
CN(c1cc(CCO[N+](=O)[O-])n(CO[N+](=O)[O-])n1)[N+](=O)[O-]	1.59902	7.51943	23.0183	92.0159	183.71
CN(c1cc(CCO[N+](=O)[O-])nn1CO[N+](=O)[O-])[N+](=O)[O-]	1.60788	7.58239	23.196	81.3849	179.177
CN(c1cc(CO[N+](=O)[O-])n(CO[N+](=O)[O-])n1)[N+](=O)[O-]	1.65527	7.85966	25.9847	86.021	174.029
CN(c1cc(CO[N+](=O)[O-])nn1CO[N+](=O)[O-])[N+](=O)[O-]	1.65403	7.87756	25.8617	86.9168	174.91
CN(c1cc(N(C)[N+](=O)[O-])n(CO[N+](=O)[O-])n1)[N+](=O)[O-]	1.63514	7.85256	25.6703	113.146	186.237
CN(c1cc(N(CCO[N+](=O)[O-])[N+](=O)[O-])n(CO[N+](=O)[O-])n1)[N+](=O)[O-]	1.67972	7.90839	27.4744	121.537	189.664
CN(c1cc(N(CCO[N+](=O)[O-])[N+](=O)[O-])nn1CO[N+](=O)[O-])[N+](=O)[O-]	1.68832	7.99337	27.6384	104.67	180.728
CN(c1cc([N+](=O)[O-])n(CO[N+](=O)[O-])n1)[N+](=O)[O-]	1.70134	8.1059	28.4733	106.439	189.854
CN(c1cc([N+](=O)[O-])nn1CO[N+](=O)[O-])[N+](=O)[O-]	1.69616	8.11333	28.1085	107.291	191.462
CN(c1ccn(CO[N+](=O)[O-])n1)[N+](=O)[O-]	1.60346	7.69106	23.4015	84.378	181.939
CN(c1ccnn1CO[N+](=O)[O-])[N+](=O)[O-]	1.60074	7.68861	23.5122	78.6171	182.365
CN(c1cn(CO[N+](=O)[O-])nc1CCO[N+](=O)[O-])[N+](=O)[O-]	1.59664	7.52933	22.897	96.1196	187.755
CN(c1cn(CO[N+](=O)[O-])nc1CO[N+](=O)[O-])[N+](=O)[O-]	1.64905	7.83962	25.7494	92.9081	177.98
CN(c1cn(CO[N+](=O)[O-])nc1N(C)[N+](=O)[O-])[N+](=O)[O-]	1.63793	7.8583	25.6328	109.884	184.46
CN(c1cn(CO[N+](=O)[O-])nc1N(CCO[N+](=O)[O-])[N+](=O)[O-])[N+](=O)[O-]	1.68107	8.02574	27.6417	106.329	185.765
CN(c1cn(CO[N+](=O)[O-])nc1[N+](=O)[O-])[N+](=O)[O-]	1.70018	8.13545	27.9961	103.459	185.458
CN(c1cnn(CO[N+](=O)[O-])c1)[N+](=O)[O-]	1.61141	7.6987	23.4295	85.567	184.248
CN(c1cnn(CO[N+](=O)[O-])c1CCO[N+](=O)[O-])[N+](=O)[O-]	1.59602	7.55421	22.844	96.894	191.879
CN(c1cnn(CO[N+](=O)[O-])c1CO[N+](=O)[O-])[N+](=O)[O-]	1.64586	7.84755	25.6888	96.9618	184.84
CN(c1cnn(CO[N+](=O)[O-])c1N(C)[N+](=O)[O-])[N+](=O)[O-]	1.63768	7.86537	25.7284	110.055	185.283
CN(c1cnn(CO[N+](=O)[O-])c1N(CCO[N+](=O)[O-])[N+](=O)[O-])[N+](=O)[O-]	1.68518	8.02658	27.6889	104.728	183.424
CN(c1cnn(CO[N+](=O)[O-])c1[N+](=O)[O-])[N+](=O)[O-]	1.70432	8.17309	28.3284	106.034	186.372
CN(c1nn(CO[N+](=O)[O-])c(CCO[N+](=O)[O-])c1CCO[N+](=O)[O-])[N+](=O)[O-]	1.60712	7.50419	22.7294	96.5378	190.516
CN(c1nn(CO[N+](=O)[O-])c(CCO[N+](=O)[O-])c1CO[N+](=O)[O-])[N+](=O)[O-]	1.64539	7.69895	25.0995	100.332	190.139
CN(c1nn(CO[N+](=O)[O-])c(CCO[N+](=O)[O-])c1N(C)[N+](=O)[O-])[N+](=O)[O-]	1.62301	7.63507	24.8237	123.493	194.693
CN(c1nn(CO[N+](=O)[O-])c(CCO[N+](=O)[O-])c1N(CCO[N+](=O)[O-])[N+](=O)[O-])[N+](=O)[O-]	1.67559	7.81857	26.7595	107.884	188.736
CN(c1nn(CO[N+](=O)[O-])c(CCO[N+](=O)[O-])c1[N+](=O)[O-])[N+](=O)[O-]	1.68894	7.96483	27.0259	97.9333	179.121
CN(c1nn(CO[N+](=O)[O-])c(CO[N+](=O)[O-])c1CCO[N+](=O)[O-])[N+](=O)[O-]	1.64789	7.69564	25.0447	99.0694	185.329
CN(c1nn(CO[N+](=O)[O-])c(CO[N+](=O)[O-])c1CO[N+](=O)[O-])[N+](=O)[O-]	1.68816	7.90982	27.3067	107.859	175.226
CN(c1nn(CO[N+](=O)[O-])c(CO[N+](=O)[O-])c1N(C)[N+](=O)[O-])[N+](=O)[O-]	1.67139	7.96791	27.2244	113.942	180.279
CN(c1nn(CO[N+](=O)[O-])c(CO[N+](=O)[O-])c1N(CCO[N+](=O)[O-])[N+](=O)[O-])[N+](=O)[O-]	1.71436	8.03555	28.8265	110.316	182.314
CN(c1nn(CO[N+](=O)[O-])c(CO[N+](=O)[O-])c1[N+](=O)[O-])[N+](=O)[O-]	1.73011	8.19485	29.4061	108.822	182.824
CN(c1nn(CO[N+](=O)[O-])c(N(C)[N+](=O)[O-])c1CCO[N+](=O)[O-])[N+](=O)[O-]	1.62716	7.68551	24.9094	116.675	188.293
CN(c1nn(CO[N+](=O)[O-])c(N(C)[N+](=O)[O-])c1CO[N+](=O)[O-])[N+](=O)[O-]	1.66917	7.92539	27.2716	120.019	182.143
CN(c1nn(CO[N+](=O)[O-])c(N(C)[N+](=O)[O-])c1N(C)[N+](=O)[O-])[N+](=O)[O-]	1.65679	7.93245	26.9819	152.598	199.059
CN(c1nn(CO[N+](=O)[O-])c(N(C)[N+](=O)[O-])c1N(CCO[N+](=O)[O-])[N+](=O)[O-])[N+](=O)[O-]	1.69026	8.04368	29.1295	148.109	218.531
CN(c1nn(CO[N+](=O)[O-])c(N(C)[N+](=O)[O-])c1[N+](=O)[O-])[N+](=O)[O-]	1.71779	8.22541	29.4658	126.885	183.053
CN(c1nn(CO[N+](=O)[O-])c(N(CCO[N+](=O)[O-])[N+](=O)[O-])c1CCO[N+](=O)[O-])[N+](=O)[O-]	1.66955	7.84142	26.979	127.209	211.752
CN(c1nn(CO[N+](=O)[O-])c(N(CCO[N+](=O)[O-])[N+](=O)[O-])c1CO[N+](=O)[O-])[N+](=O)[O-]	1.71062	8.00525	28.622	129.209	200.608
CN(c1nn(CO[N+](=O)[O-])c(N(CCO[N+](=O)[O-])[N+](=O)[O-])c1N(C)[N+](=O)[O-])[N+](=O)[O-]	1.68952	8.00223	28.4306	157.741	215.368
CN(c1nn(CO[N+](=O)[O-])c(N(CCO[N+](=O)[O-])[N+](=O)[O-])c1N(CCO[N+](=O)[O-])[N+](=O)[O-])[N+](=O)[O-]	1.73267	8.1149	30.3744	151.024	221.298
CN(c1nn(CO[N+](=O)[O-])c(N(CCO[N+](=O)[O-])[N+](=O)[O-])c1[N+](=O)[O-])[N+](=O)[O-]	1.75029	8.30987	31.0782	119.651	186.986
CN(c1nn(CO[N+](=O)[O-])c([N+](=O)[O-])c1CCO[N+](=O)[O-])[N+](=O)[O-]	1.68268	7.96806	26.9962	104.024	188.493
CN(c1nn(CO[N+](=O)[O-])c([N+](=O)[O-])c1CO[N+](=O)[O-])[N+](=O)[O-]	1.73121	8.22053	29.6574	108.458	182.461
CN(c1nn(CO[N+](=O)[O-])c([N+](=O)[O-])c1N(C)[N+](=O)[O-])[N+](=O)[O-]	1.71506	8.21518	29.4131	129.342	184.048
CN(c1nn(CO[N+](=O)[O-])c([N+](=O)[O-])c1N(CCO[N+](=O)[O-])[N+](=O)[O-])[N+](=O)[O-]	1.74138	8.30316	31.2971	122.944	195.132
CN(c1nn(CO[N+](=O)[O-])c([N+](=O)[O-])c1[N+](=O)[O-])[N+](=O)[O-]	1.78431	8.51341	32.1747	115.493	180.957
CN(c1nn(CO[N+](=O)[O-])cc1CCO[N+](=O)[O-])[N+](=O)[O-]	1.60396	7.5714	23.0301	83.9737	181.123
CN(c1nn(CO[N+](=O)[O-])cc1CO[N+](=O)[O-])[N+](=O)[O-]	1.65255	7.86141	25.7676	87.6488	175.114
CN(c1nn(CO[N+](=O)[O-])cc1N(CCO[N+](=O)[O-])[N+](=O)[O-])[N+](=O)[O-]	1.67695	7.97298	27.4686	116.942	196.445
CN(c1nn(CO[N+](=O)[O-])cc1[N+](=O)[O-])[N+](=O)[O-]	1.70389	8.15828	28.1436	104.452	184.307
COc1c(C)c(C)nn1CO[N+](=O)[O-]	1.38963	6.37865	12.9555	69.3908	221.224
COc1c(C)c(CCO[N+](=O)[O-])nn1CO[N+](=O)[O-]	1.47655	6.78223	16.5915	76.4068	194.455
COc1c(C)c(CO[N+](=O)[O-])nn1CO[N+](=O)[O-]	1.5209	7.01939	19.543	79.27	182.382
COc1c(C)c(N(C)[N+](=O)[O-])nn1CO[N+](=O)[O-]	1.48905	6.91372	18.9255	93.7965	188.801
COc1c(C)c(N(CCO[N+](=O)[O-])[N+](=O)[O-])nn1CO[N+](=O)[O-]	1.54636	7.11909	21.7883	100.382	179.324
COc1c(C)c([N+](=O)[O-])nn1CO[N+](=O)[O-]	1.556	7.16396	21.2847	93.5586	198.648
COc1c(C)cnn1CO[N+](=O)[O-]	1.43681	6.60018	15.0474	64.3485	221.998
COc1c(C)nn(CO[N+](=O)[O-])c1C	1.38597	6.3647	12.5206	72.7221	227.486
COc1c(C)nn(CO[N+](=O)[O-])c1CCO[N+](=O)[O-]	1.46934	6.73227	17.1374	87.5793	185.925
COc1c(C)nn(CO[N+](=O)[O-])c1CO[N+](=O)[O-]	1.51386	6.9904	19.7763	90.4195	180.199
COc1c(C)nn(CO[N+](=O)[O-])c1N(C)[N+](=O)[O-]	1.48783	6.89535	19.0243	96.0288	192.346
COc1c(C)nn(CO[N+](=O)[O-])c1N(CCO[N+](=O)[O-])[N+](=O)[O-]	1.54956	7.15665	21.832	88.9284	175.909
COc1c(C)nn(CO[N+](=O)[O-])c1OC	1.41473	6.32586	14.5833	61.2339	193.141
COc1c(C)nn(CO[N+](=O)[O-])c1[N+](=O)[O-]	1.55746	7.18556	21.1388	90.6084	205.375
COc1c(CCO[N+](=O)[O-])c(C)nn1CO[N+](=O)[O-]	1.47312	6.78523	16.4547	78.3874	195.593
COc1c(CCO[N+](=O)[O-])c(CCO[N+](=O)[O-])nn1CO[N+](=O)[O-]	1.5435	6.95384	19.2732	93.3152	169.446
COc1c(CCO[N+](=O)[O-])c(CO[N+](=O)[O-])nn1CO[N+](=O)[O-]	1.5822	7.1948	21.4736	102.417	170.224
COc1c(CCO[N+](=O)[O-])c(N(C)[N+](=O)[O-])nn1CO[N+](=O)[O-]	1.55138	7.16053	21.0651	90.1405	176.628
COc1c(CCO[N+](=O)[O-])c(N(CCO[N+](=O)[O-])[N+](=O)[O-])nn1CO[N+](=O)[O-]	1.59895	7.33363	23.031	93.2817	174.081
COc1c(CCO[N+](=O)[O-])c([N+](=O)[O-])nn1CO[N+](=O)[O-]	1.61996	7.42756	23.0211	88.5077	184.908
COc1c(CCO[N+](=O)[O-])cnn1CO[N+](=O)[O-]	1.52529	6.99844	18.7016	71.8206	188.025
COc1c(CCO[N+](=O)[O-])nn(CO[N+](=O)[O-])c1C	1.47442	6.77621	16.4315	77.7504	195.359
COc1c(CCO[N+](=O)[O-])nn(CO[N+](=O)[O-])c1CCO[N+](=O)[O-]	1.53587	7.02366	18.6285	88.9976	174.181
COc1c(CCO[N+](=O)[O-])nn(CO[N+](=O)[O-])c1CO[N+](=O)[O-]	1.58303	7.20515	21.4565	82.765	167.719
COc1c(CCO[N+](=O)[O-])nn(CO[N+](=O)[O-])c1N(C)[N+](=O)[O-]	1.55216	7.17418	21.0319	87.8169	176.696
COc1c(CCO[N+](=O)[O-])nn(CO[N+](=O)[O-])c1N(CCO[N+](=O)[O-])[N+](=O)[O-]	1.60551	7.29283	23.3611	88.2371	165.946
COc1c(CCO[N+](=O)[O-])nn(CO[N+](=O)[O-])c1OC	1.48772	6.68151	17.398	74.993	165.835
COc1c(CCO[N+](=O)[O-])nn(CO[N+](=O)[O-])c1[N+](=O)[O-]	1.62166	7.42804	23.3098	86.4385	184.471
COc1c(CO[N+](=O)[O-])c(C)nn1CO[N+](=O)[O-]	1.51952	7.01624	19.0952	80.7865	190.721
COc1c(CO[N+](=O)[O-])c(CCO[N+](=O)[O-])nn1CO[N+](=O)[O-]	1.58523	7.19597	21.7034	86.6761	163.001
COc1c(CO[N+](=O)[O-])c(CO[N+](=O)[O-])nn1CO[N+](=O)[O-]	1.63184	7.46562	24.0129	79.9377	157.319
COc1c(CO[N+](=O)[O-])c(N(C)[N+](=O)[O-])nn1CO[N+](=O)[O-]	1.5939	7.41256	23.4142	90.4499	176.753
COc1c(CO[N+](=O)[O-])c(N(CCO[N+](=O)[O-])[N+](=O)[O-])nn1CO[N+](=O)[O-]	1.64461	7.53498	25.4283	88.742	159.931
COc1c(CO[N+](=O)[O-])c([N+](=O)[O-])nn1CO[N+](=O)[O-]	1.66395	7.6363	25.928	92.635	184.759
COc1c(CO[N+](=O)[O-])cnn1CO[N+](=O)[O-]	1.57849	7.28762	21.3226	78.2501	186.469
COc1c(CO[N+](=O)[O-])nn(CO[N+](=O)[O-])c1C	1.51632	7.0188	19.2172	82.8111	185.283
COc1c(CO[N+](=O)[O-])nn(CO[N+](=O)[O-])c1CCO[N+](=O)[O-]	1.58091	7.17779	21.6094	102.811	168.178
COc1c(CO[N+](=O)[O-])nn(CO[N+](=O)[O-])c1CO[N+](=O)[O-]	1.62709	7.47038	23.7651	83.1017	161.244
COc1c(CO[N+](=O)[O-])nn(CO[N+](=O)[O-])c1N(C)[N+](=O)[O-]	1.59328	7.40606	23.5144	98.2566	171.557
COc1c(CO[N+](=O)[O-])nn(CO[N+](=O)[O-])c1N(CCO[N+](=O)[O-])[N+](=O)[O-]	1.64055	7.51698	25.3953	100.584	173.667
COc1c(CO[N+](=O)[O-])nn(CO[N+](=O)[O-])c1OC	1.53451	6.91671	19.7756	75.0611	164.984
COc1c(CO[N+](=O)[O-])nn(CO[N+](=O)[O-])c1[N+](=O)[O-]	1.67433	7.70512	26.0655	89.9683	178.627
COc1c(N(C)[N+](=O)[O-])c(C)nn1CO[N+](=O)[O-]	1.49279	6.95685	18.4855	88.4784	199.24
COc1c(N(C)[N+](=O)[O-])c(CCO[N+](=O)[O-])nn1CO[N+](=O)[O-]	1.55265	7.13848	21.1699	90.327	173.388
COc1c(N(C)[N+](=O)[O-])c(CO[N+](=O)[O-])nn1CO[N+](=O)[O-]	1.59451	7.40486	23.5064	94.2827	171.162
COc1c(N(C)[N+](=O)[O-])c(N(C)[N+](=O)[O-])nn1CO[N+](=O)[O-]	1.57043	7.3487	23.0266	113.008	189.086
COc1c(N(C)[N+](=O)[O-])c(N(CCO[N+](=O)[O-])[N+](=O)[O-])nn1CO[N+](=O)[O-]	1.61077	7.49538	24.9307	109.143	186.11
COc1c(N(C)[N+](=O)[O-])c([N+](=O)[O-])nn1CO[N+](=O)[O-]	1.63837	7.62712	25.2293	103.868	183.686
COc1c(N(C)[N+](=O)[O-])cnn1CO[N+](=O)[O-]	1.54516	7.18966	20.9711	87.3579	197.558
COc1c(N(C)[N+](=O)[O-])nn(CO[N+](=O)[O-])c1C	1.49399	6.95974	18.4081	87.6725	199.901
COc1c(N(C)[N+](=O)[O-])nn(CO[N+](=O)[O-])c1CCO[N+](=O)[O-]	1.55372	7.1746	21.0467	85.1519	175.992
COc1c(N(C)[N+](=O)[O-])nn(CO[N+](=O)[O-])c1CO[N+](=O)[O-]	1.59204	7.41631	23.3558	97.5193	173.801
COc1c(N(C)[N+](=O)[O-])nn(CO[N+](=O)[O-])c1N(C)[N+](=O)[O-]	1.57176	7.36327	23.0086	112.05	183.248
COc1c(N(C)[N+](=O)[O-])nn(CO[N+](=O)[O-])c1N(CCO[N+](=O)[O-])[N+](=O)[O-]	1.6096	7.43666	24.9842	124.646	179.054
COc1c(N(C)[N+](=O)[O-])nn(CO[N+](=O)[O-])c1OC	1.50551	6.82606	19.4	77.3601	176.114
COc1c(N(C)[N+](=O)[O-])nn(CO[N+](=O)[O-])c1[N+](=O)[O-]	1.64707	7.62934	25.7648	101.357	179.325
COc1c(N(CCO[N+](=O)[O-])[N+](=O)[O-])c(C)nn1CO[N+](=O)[O-]	1.5482	7.20458	21.1324	84.6481	183.019
COc1c(N(CCO[N+](=O)[O-])[N+](=O)[O-])c(CCO[N+](=O)[O-])nn1CO[N+](=O)[O-]	1.60403	7.29803	23.0111	96.2958	169.431
COc1c(N(CCO[N+](=O)[O-])[N+](=O)[O-])c(CO[N+](=O)[O-])nn1CO[N+](=O)[O-]	1.64285	7.50397	25.3293	99.4095	162.667
COc1c(N(CCO[N+](=O)[O-])[N+](=O)[O-])c(N(C)[N+](=O)[O-])nn1CO[N+](=O)[O-]	1.61058	7.53063	24.8432	105.086	184.473
COc1c(N(CCO[N+](=O)[O-])[N+](=O)[O-])c(N(CCO[N+](=O)[O-])[N+](=O)[O-])nn1CO[N+](=O)[O-]	1.6563	7.57093	26.5223	116.394	175.881
COc1c(N(CCO[N+](=O)[O-])[N+](=O)[O-])c([N+](=O)[O-])nn1CO[N+](=O)[O-]	1.67641	7.76889	26.9482	96.9331	174.501
COc1c(N(CCO[N+](=O)[O-])[N+](=O)[O-])cnn1CO[N+](=O)[O-]	1.60143	7.44545	23.2721	83.396	178.802
COc1c(N(CCO[N+](=O)[O-])[N+](=O)[O-])nn(CO[N+](=O)[O-])c1C	1.5463	7.19542	21.1652	85.64	183.301
COc1c(N(CCO[N+](=O)[O-])[N+](=O)[O-])nn(CO[N+](=O)[O-])c1CCO[N+](=O)[O-]	1.60025	7.30291	22.975	108.405	182.249
COc1c(N(CCO[N+](=O)[O-])[N+](=O)[O-])nn(CO[N+](=O)[O-])c1CO[N+](=O)[O-]	1.6396	7.57162	25.0235	86.7867	163.483
COc1c(N(CCO[N+](=O)[O-])[N+](=O)[O-])nn(CO[N+](=O)[O-])c1N(C)[N+](=O)[O-]	1.61565	7.50924	24.9379	103.022	177.192
COc1c(N(CCO[N+](=O)[O-])[N+](=O)[O-])nn(CO[N+](=O)[O-])c1N(CCO[N+](=O)[O-])[N+](=O)[O-]	1.64988	7.63923	26.545	116.675	186.655
COc1c(N(CCO[N+](=O)[O-])[N+](=O)[O-])nn(CO[N+](=O)[O-])c1OC	1.55558	7.06038	21.5016	77.8887	161.329
COc1c(N(CCO[N+](=O)[O-])[N+](=O)[O-])nn(CO[N+](=O)[O-])c1[N+](=O)[O-]	1.67947	7.74272	27.2583	101.668	178.79
COc1c([N+](=O)[O-])c(C)nn1CO[N+](=O)[O-]	1.56635	7.18184	20.9133	91.4519	208.587
COc1c([N+](=O)[O-])c(CCO[N+](=O)[O-])nn1CO[N+](=O)[O-]	1.62137	7.38595	23.4465	89.825	182.896
COc1c([N+](=O)[O-])c(CO[N+](=O)[O-])nn1CO[N+](=O)[O-]	1.67639	7.68636	26.0383	90.2473	178.313
COc1c([N+](=O)[O-])c(N(C)[N+](=O)[O-])nn1CO[N+](=O)[O-]	1.64627	7.62821	25.4309	100.467	181.411
COc1c([N+](=O)[O-])c(N(CCO[N+](=O)[O-])[N+](=O)[O-])nn1CO[N+](=O)[O-]	1.67842	7.7564	27.0832	97.5801	176.637
COc1c([N+](=O)[O-])c([N+](=O)[O-])nn1CO[N+](=O)[O-]	1.72143	7.90618	28.3952	97.2116	191.918
COc1c([N+](=O)[O-])cnn1CO[N+](=O)[O-]	1.6294	7.48365	23.7713	89.4832	209.109
COc1c([N+](=O)[O-])nn(CO[N+](=O)[O-])c1C	1.56297	7.18429	20.8033	91.9731	208.021
COc1c([N+](=O)[O-])nn(CO[N+](=O)[O-])c1CCO[N+](=O)[O-]	1.6127	7.36292	23.3438	98.7106	183.273
COc1c([N+](=O)[O-])nn(CO[N+](=O)[O-])c1CO[N+](=O)[O-]	1.67096	7.66875	26.2081	88.9962	175.232
COc1c([N+](=O)[O-])nn(CO[N+](=O)[O-])c1N(C)[N+](=O)[O-]	1.63793	7.61804	25.3676	108.074	178.717
COc1c([N+](=O)[O-])nn(CO[N+](=O)[O-])c1N(CCO[N+](=O)[O-])[N+](=O)[O-]	1.67517	7.70755	27.2769	101.781	181.484
COc1c([N+](=O)[O-])nn(CO[N+](=O)[O-])c1OC	1.57396	7.06487	21.6258	80.0692	180.09
COc1c([N+](=O)[O-])nn(CO[N+](=O)[O-])c1[N+](=O)[O-]	1.72074	7.95658	28.4149	97.6584	195.295
COc1cc(C)n(CO[N+](=O)[O-])n1	1.43995	6.59844	15.006	63.2823	222.242
COc1cc(C)nn1CO[N+](=O)[O-]	1.43684	6.59762	15.2515	61.9797	217.448
COc1cc(CCO[N+](=O)[O-])n(CO[N+](=O)[O-])n1	1.5208	6.96045	19.0323	78.4669	188.436
COc1cc(CCO[N+](=O)[O-])nn1CO[N+](=O)[O-]	1.52893	6.99312	18.6249	70.6154	189.658
COc1cc(CO[N+](=O)[O-])n(CO[N+](=O)[O-])n1	1.57604	7.25271	22.1982	75.8187	181.274
COc1cc(CO[N+](=O)[O-])nn1CO[N+](=O)[O-]	1.57926	7.27468	21.8064	72.5439	182.733
COc1cc(N(C)[N+](=O)[O-])n(CO[N+](=O)[O-])n1	1.53696	7.15695	21.4437	98.1741	185.227
COc1cc(N(C)[N+](=O)[O-])nn1CO[N+](=O)[O-]	1.55375	7.19607	21.3541	79.5825	188.773
COc1cc(N(CCO[N+](=O)[O-])[N+](=O)[O-])n(CO[N+](=O)[O-])n1	1.60405	7.39333	23.9301	85.5187	179.115
COc1cc(N(CCO[N+](=O)[O-])[N+](=O)[O-])nn1CO[N+](=O)[O-]	1.60452	7.41141	23.588	83.5044	176.404
COc1cc(OC)n(CO[N+](=O)[O-])n1	1.46483	6.55522	16.9574	54.1978	192.017
COc1cc([N+](=O)[O-])n(CO[N+](=O)[O-])n1	1.62932	7.49955	24.3708	84.2143	204.637
COc1cc([N+](=O)[O-])nn1CO[N+](=O)[O-]	1.63075	7.48824	24.0543	85.2936	205.707
COc1ccn(CO[N+](=O)[O-])n1	1.49798	6.89425	17.7669	61.7664	215.064
COc1ccnn1CO[N+](=O)[O-]	1.50013	6.88856	17.9524	59.0795	215.388
COc1cn(CO[N+](=O)[O-])nc1C	1.43604	6.59877	15.0783	64.9117	220.624
COc1cn(CO[N+](=O)[O-])nc1CCO[N+](=O)[O-]	1.5225	6.98999	18.7251	75.1038	188.545
COc1cn(CO[N+](=O)[O-])nc1CO[N+](=O)[O-]	1.57827	7.27247	21.5868	74.7311	184.836
COc1cn(CO[N+](=O)[O-])nc1N(C)[N+](=O)[O-]	1.55121	7.20066	21.1589	81.2292	191.277
COc1cn(CO[N+](=O)[O-])nc1N(CCO[N+](=O)[O-])[N+](=O)[O-]	1.60241	7.44294	23.2803	80.9166	177.151
COc1cn(CO[N+](=O)[O-])nc1OC	1.46915	6.56291	16.6536	56.6291	198.819
COc1cn(CO[N+](=O)[O-])nc1[N+](=O)[O-]	1.6278	7.48077	23.8927	84.4646	204.863
COc1cnn(CO[N+](=O)[O-])c1	1.50625	6.90053	17.4801	72.3731	224.16
COc1cnn(CO[N+](=O)[O-])c1C	1.43506	6.59249	14.6883	70.0558	226.744
COc1cnn(CO[N+](=O)[O-])c1CCO[N+](=O)[O-]	1.51739	6.92245	19.4957	89.1517	186.635
COc1cnn(CO[N+](=O)[O-])c1CO[N+](=O)[O-]	1.56987	7.23582	22.1929	87.4471	185.207
COc1cnn(CO[N+](=O)[O-])c1N(C)[N+](=O)[O-]	1.54979	7.19983	21.3567	81.9928	188.476
COc1cnn(CO[N+](=O)[O-])c1N(CCO[N+](=O)[O-])[N+](=O)[O-]	1.60451	7.38427	24.0585	83.1879	180.289
COc1cnn(CO[N+](=O)[O-])c1OC	1.47221	6.5664	16.4837	59.2424	203.979
COc1cnn(CO[N+](=O)[O-])c1[N+](=O)[O-]	1.63355	7.50224	24.1306	85.537	207.271
COc1nn(CO[N+](=O)[O-])c(C)c1C	1.38233	6.35696	12.9813	72.1579	215.584
COc1nn(CO[N+](=O)[O-])c(C)c1CCO[N+](=O)[O-]	1.4738	6.78201	16.3582	78.5016	196.337
COc1nn(CO[N+](=O)[O-])c(C)c1CO[N+](=O)[O-]	1.52416	7.01286	19.2823	77.5257	186.316
COc1nn(CO[N+](=O)[O-])c(C)c1N(C)[N+](=O)[O-]	1.49558	6.93771	18.6523	86.3598	191.848
COc1nn(CO[N+](=O)[O-])c(C)c1N(CCO[N+](=O)[O-])[N+](=O)[O-]	1.54673	7.19071	21.0711	85.9714	184.672
COc1nn(CO[N+](=O)[O-])c(C)c1OC	1.4181	6.32769	14.3222	62.6912	200.535
COc1nn(CO[N+](=O)[O-])c(C)c1[N+](=O)[O-]	1.56687	7.17141	20.961	90.5395	206.894
COc1nn(CO[N+](=O)[O-])c(CCO[N+](=O)[O-])c1C	1.47382	6.76184	16.9935	77.9104	186.555
COc1nn(CO[N+](=O)[O-])c(CCO[N+](=O)[O-])c1CCO[N+](=O)[O-]	1.54484	6.94373	19.6447	88.85	165.121
COc1nn(CO[N+](=O)[O-])c(CCO[N+](=O)[O-])c1CO[N+](=O)[O-]	1.58293	7.15923	21.6348	96.8784	172.795
COc1nn(CO[N+](=O)[O-])c(CCO[N+](=O)[O-])c1N(C)[N+](=O)[O-]	1.54781	7.12674	21.1018	100.436	175.231
COc1nn(CO[N+](=O)[O-])c(CCO[N+](=O)[O-])c1N(CCO[N+](=O)[O-])[N+](=O)[O-]	1.59845	7.37206	22.6901	89.0266	169.676
COc1nn(CO[N+](=O)[O-])c(CCO[N+](=O)[O-])c1OC	1.48162	6.61605	18.1704	83.9516	155.058
COc1nn(CO[N+](=O)[O-])c(CCO[N+](=O)[O-])c1[N+](=O)[O-]	1.61692	7.35447	23.4609	97.0604	184.36
COc1nn(CO[N+](=O)[O-])c(CO[N+](=O)[O-])c1C	1.5159	7.00076	19.735	85.2393	179.697
COc1nn(CO[N+](=O)[O-])c(CO[N+](=O)[O-])c1CCO[N+](=O)[O-]	1.58257	7.18472	21.5114	88.4482	172.445
COc1nn(CO[N+](=O)[O-])c(CO[N+](=O)[O-])c1CO[N+](=O)[O-]	1.62924	7.4346	24.1884	83.6814	161.031
COc1nn(CO[N+](=O)[O-])c(CO[N+](=O)[O-])c1N(C)[N+](=O)[O-]	1.59674	7.40024	23.6699	90.727	169.561
COc1nn(CO[N+](=O)[O-])c(CO[N+](=O)[O-])c1N(CCO[N+](=O)[O-])[N+](=O)[O-]	1.64144	7.54852	25.2452	88.052	164.837
COc1nn(CO[N+](=O)[O-])c(CO[N+](=O)[O-])c1OC	1.5308	6.87753	20.4833	77.5622	154.836
COc1nn(CO[N+](=O)[O-])c(CO[N+](=O)[O-])c1[N+](=O)[O-]	1.66949	7.64578	26.2501	92.9984	180.541
COc1nn(CO[N+](=O)[O-])c(N(C)[N+](=O)[O-])c1C	1.49276	6.91929	19.1123	89.824	187.38
COc1nn(CO[N+](=O)[O-])c(N(C)[N+](=O)[O-])c1CCO[N+](=O)[O-]	1.55031	7.1552	21.1881	89.1336	184.339
COc1nn(CO[N+](=O)[O-])c(N(C)[N+](=O)[O-])c1CO[N+](=O)[O-]	1.59802	7.41367	23.6777	88.6082	169.498
COc1nn(CO[N+](=O)[O-])c(N(C)[N+](=O)[O-])c1N(C)[N+](=O)[O-]	1.57229	7.33658	23.1993	111.869	185.635
COc1nn(CO[N+](=O)[O-])c(N(C)[N+](=O)[O-])c1N(CCO[N+](=O)[O-])[N+](=O)[O-]	1.61023	7.5291	24.9694	106.621	186.695
COc1nn(CO[N+](=O)[O-])c(N(C)[N+](=O)[O-])c1OC	1.49912	6.79702	19.8769	81.8645	161.85
COc1nn(CO[N+](=O)[O-])c(N(C)[N+](=O)[O-])c1[N+](=O)[O-]	1.64391	7.60101	25.6808	100.817	180.125
COc1nn(CO[N+](=O)[O-])c(N(CCO[N+](=O)[O-])[N+](=O)[O-])c1C	1.54687	7.18686	21.494	88.0602	184.953
COc1nn(CO[N+](=O)[O-])c(N(CCO[N+](=O)[O-])[N+](=O)[O-])c1CCO[N+](=O)[O-]	1.6034	7.33049	23.1347	91.7865	170.606
COc1nn(CO[N+](=O)[O-])c(N(CCO[N+](=O)[O-])[N+](=O)[O-])c1CO[N+](=O)[O-]	1.64318	7.53614	25.4702	93.9127	165.931
COc1nn(CO[N+](=O)[O-])c(N(CCO[N+](=O)[O-])[N+](=O)[O-])c1N(C)[N+](=O)[O-]	1.60976	7.44919	25.0082	123.566	186.979
COc1nn(CO[N+](=O)[O-])c(N(CCO[N+](=O)[O-])[N+](=O)[O-])c1N(CCO[N+](=O)[O-])[N+](=O)[O-]	1.65332	7.60168	26.951	110.817	183.983
COc1nn(CO[N+](=O)[O-])c(N(CCO[N+](=O)[O-])[N+](=O)[O-])c1OC	1.5531	6.98169	22.3994	84.0257	149.139
COc1nn(CO[N+](=O)[O-])c(N(CCO[N+](=O)[O-])[N+](=O)[O-])c1[N+](=O)[O-]	1.68006	7.73454	27.4107	99.5447	177.166
COc1nn(CO[N+](=O)[O-])c(OC)c1C	1.40492	6.30983	14.9245	65.4341	180.957
COc1nn(CO[N+](=O)[O-])c(OC)c1CCO[N+](=O)[O-]	1.49044	6.67431	17.2681	73.4347	171.173
COc1nn(CO[N+](=O)[O-])c(OC)c1CO[N+](=O)[O-]	1.53491	6.91186	20.0888	72.5574	158.598
COc1nn(CO[N+](=O)[O-])c(OC)c1N(C)[N+](=O)[O-]	1.50621	6.82713	19.3935	76.4673	174.878
COc1nn(CO[N+](=O)[O-])c(OC)c1N(CCO[N+](=O)[O-])[N+](=O)[O-]	1.553	7.04172	21.5195	84.9631	163.216
COc1nn(CO[N+](=O)[O-])c(OC)c1OC	1.4327	6.26934	15.9531	55.6469	164.706
COc1nn(CO[N+](=O)[O-])c(OC)c1[N+](=O)[O-]	1.57864	7.04786	21.9625	76.5241	177.847
COc1nn(CO[N+](=O)[O-])c([N+](=O)[O-])c1C	1.55478	7.16966	21.4257	94.7406	200.3
COc1nn(CO[N+](=O)[O-])c([N+](=O)[O-])c1CCO[N+](=O)[O-]	1.62651	7.43407	23.5027	86.6566	185.117
COc1nn(CO[N+](=O)[O-])c([N+](=O)[O-])c1CO[N+](=O)[O-]	1.67099	7.68596	26.1764	90.325	180.998
COc1nn(CO[N+](=O)[O-])c([N+](=O)[O-])c1N(C)[N+](=O)[O-]	1.64674	7.63959	25.7032	99.7382	180.414
COc1nn(CO[N+](=O)[O-])c([N+](=O)[O-])c1N(CCO[N+](=O)[O-])[N+](=O)[O-]	1.68069	7.76226	27.3984	95.5233	176.061
COc1nn(CO[N+](=O)[O-])c([N+](=O)[O-])c1OC	1.5829	7.07695	22.2272	77.1754	179.21
COc1nn(CO[N+](=O)[O-])c([N+](=O)[O-])c1[N+](=O)[O-]	1.72806	7.93226	28.7218	97.6077	191.842
COc1nn(CO[N+](=O)[O-])cc1C	1.44121	6.60737	14.9694	65.292	225.074
COc1nn(CO[N+](=O)[O-])cc1CCO[N+](=O)[O-]	1.52227	7.00149	18.4505	74.6089	189.032
COc1nn(CO[N+](=O)[O-])cc1CO[N+](=O)[O-]	1.58406	7.26126	21.8557	70.8978	183.415
COc1nn(CO[N+](=O)[O-])cc1N(C)[N+](=O)[O-]	1.55314	7.20201	21.1358	80.2433	190.843
COc1nn(CO[N+](=O)[O-])cc1N(CCO[N+](=O)[O-])[N+](=O)[O-]	1.60573	7.42189	23.4323	81.0199	175.875
COc1nn(CO[N+](=O)[O-])cc1[N+](=O)[O-]	1.62593	7.48337	23.7835	87.2699	206.875
Cc1c(CCO[N+](=O)[O-])c(CCO[N+](=O)[O-])nn1CO[N+](=O)[O-]	1.53436	7.11814	18.6384	80.2645	182.682
Cc1c(CCO[N+](=O)[O-])c(CO[N+](=O)[O-])nn1CO[N+](=O)[O-]	1.57263	7.33524	21.0732	85.0344	178.664
Cc1c(CCO[N+](=O)[O-])c(N(C)[N+](=O)[O-])nn1CO[N+](=O)[O-]	1.54587	7.32289	20.6671	94.8995	186.881
Cc1c(CCO[N+](=O)[O-])c(N(CCO[N+](=O)[O-])[N+](=O)[O-])nn1CO[N+](=O)[O-]	1.60746	7.43469	23.0376	95.1221	178.14
Cc1c(CCO[N+](=O)[O-])c([N+](=O)[O-])nn1CO[N+](=O)[O-]	1.60733	7.57405	22.7071	90.661	197.387
Cc1c(CCO[N+](=O)[O-])cnn1CO[N+](=O)[O-]	1.4997	7.14437	17.5574	75.2427	196.035
Cc1c(CCO[N+](=O)[O-])nn(CO[N+](=O)[O-])c1C	1.45429	6.92025	15.794	78.1197	206.152
Cc1c(CCO[N+](=O)[O-])nn(CO[N+](=O)[O-])c1CCO[N+](=O)[O-]	1.53216	7.12982	18.6401	86.7082	190.391
Cc1c(CCO[N+](=O)[O-])nn(CO[N+](=O)[O-])c1CO[N+](=O)[O-]	1.57223	7.41038	20.8461	83.3291	180.593
Cc1c(CCO[N+](=O)[O-])nn(CO[N+](=O)[O-])c1N(C)[N+](=O)[O-]	1.55533	7.38643	20.9476	87.0142	187.812
Cc1c(CCO[N+](=O)[O-])nn(CO[N+](=O)[O-])c1N(CCO[N+](=O)[O-])[N+](=O)[O-]	1.60556	7.5689	23.2139	88.718	183.664
Cc1c(CCO[N+](=O)[O-])nn(CO[N+](=O)[O-])c1[N+](=O)[O-]	1.60825	7.59601	22.8783	90.8464	198.018
Cc1c(CO[N+](=O)[O-])c(CCO[N+](=O)[O-])nn1CO[N+](=O)[O-]	1.57258	7.36037	20.9228	84.0285	179.937
Cc1c(CO[N+](=O)[O-])c(CO[N+](=O)[O-])nn1CO[N+](=O)[O-]	1.61922	7.63261	23.5802	81.5753	171.277
Cc1c(CO[N+](=O)[O-])c(N(C)[N+](=O)[O-])nn1CO[N+](=O)[O-]	1.59363	7.5962	23.3106	91.7286	180.485
Cc1c(CO[N+](=O)[O-])c(N(CCO[N+](=O)[O-])[N+](=O)[O-])nn1CO[N+](=O)[O-]	1.64361	7.72927	25.3482	94.572	184.151
Cc1c(CO[N+](=O)[O-])c([N+](=O)[O-])nn1CO[N+](=O)[O-]	1.65979	7.85741	25.6317	94.2017	189.784
Cc1c(CO[N+](=O)[O-])cnn1CO[N+](=O)[O-]	1.56464	7.41902	20.7809	82.032	193.006
Cc1c(CO[N+](=O)[O-])nn(CO[N+](=O)[O-])c1C	1.50022	7.18655	18.4001	82.5797	200.04
Cc1c(CO[N+](=O)[O-])nn(CO[N+](=O)[O-])c1CCO[N+](=O)[O-]	1.57252	7.38196	20.9818	82.9551	182.544
Cc1c(CO[N+](=O)[O-])nn(CO[N+](=O)[O-])c1CO[N+](=O)[O-]	1.6219	7.6569	23.6366	80.6556	170.28
Cc1c(CO[N+](=O)[O-])nn(CO[N+](=O)[O-])c1N(C)[N+](=O)[O-]	1.59268	7.61775	23.3472	94.2599	181.102
Cc1c(CO[N+](=O)[O-])nn(CO[N+](=O)[O-])c1N(CCO[N+](=O)[O-])[N+](=O)[O-]	1.64418	7.67284	25.2117	107.696	181.523
Cc1c(CO[N+](=O)[O-])nn(CO[N+](=O)[O-])c1[N+](=O)[O-]	1.65717	7.87451	25.7785	93.7684	193.143
Cc1c(N(C)[N+](=O)[O-])c(CCO[N+](=O)[O-])nn1CO[N+](=O)[O-]	1.54296	7.28498	20.723	100.892	192.039
Cc1c(N(C)[N+](=O)[O-])c(CO[N+](=O)[O-])nn1CO[N+](=O)[O-]	1.59159	7.58189	23.2393	94.5738	179.472
Cc1c(N(C)[N+](=O)[O-])c(N(C)[N+](=O)[O-])nn1CO[N+](=O)[O-]	1.58121	7.59445	23.1132	114.1	194.757
Cc1c(N(C)[N+](=O)[O-])c(N(CCO[N+](=O)[O-])[N+](=O)[O-])nn1CO[N+](=O)[O-]	1.6212	7.73983	25.2362	114.303	197.539
Cc1c(N(C)[N+](=O)[O-])c([N+](=O)[O-])nn1CO[N+](=O)[O-]	1.63416	7.80661	25.0716	107.784	190.285
Cc1c(N(C)[N+](=O)[O-])cnn1CO[N+](=O)[O-]	1.53394	7.37998	20.3273	90.1972	197.914
Cc1c(N(C)[N+](=O)[O-])nn(CO[N+](=O)[O-])c1C	1.48021	7.11296	18.0508	90.9418	201.738
Cc1c(N(C)[N+](=O)[O-])nn(CO[N+](=O)[O-])c1CCO[N+](=O)[O-]	1.54337	7.28974	20.7243	100.563	186.104
Cc1c(N(C)[N+](=O)[O-])nn(CO[N+](=O)[O-])c1CO[N+](=O)[O-]	1.59444	7.60687	23.4483	92.1424	180.64
Cc1c(N(C)[N+](=O)[O-])nn(CO[N+](=O)[O-])c1N(C)[N+](=O)[O-]	1.57907	7.57104	23.1402	117.222	188.232
Cc1c(N(C)[N+](=O)[O-])nn(CO[N+](=O)[O-])c1N(CCO[N+](=O)[O-])[N+](=O)[O-]	1.62253	7.76379	25.4085	113.929	198.53
Cc1c(N(C)[N+](=O)[O-])nn(CO[N+](=O)[O-])c1[N+](=O)[O-]	1.63911	7.83366	25.4568	108.988	193.743
Cc1c(N(CCO[N+](=O)[O-])[N+](=O)[O-])c(CCO[N+](=O)[O-])nn1CO[N+](=O)[O-]	1.60814	7.49564	22.9884	90.2346	181.738
Cc1c(N(CCO[N+](=O)[O-])[N+](=O)[O-])c(CO[N+](=O)[O-])nn1CO[N+](=O)[O-]	1.64338	7.68517	24.971	105.094	184.055
Cc1c(N(CCO[N+](=O)[O-])[N+](=O)[O-])c(N(C)[N+](=O)[O-])nn1CO[N+](=O)[O-]	1.62513	7.76893	25.3081	107.449	192.958
Cc1c(N(CCO[N+](=O)[O-])[N+](=O)[O-])c(N(CCO[N+](=O)[O-])[N+](=O)[O-])nn1CO[N+](=O)[O-]	1.66947	7.80246	26.8602	120.792	202.63
Cc1c(N(CCO[N+](=O)[O-])[N+](=O)[O-])c([N+](=O)[O-])nn1CO[N+](=O)[O-]	1.67059	7.97978	27.0615	102.116	188.274
Cc1c(N(CCO[N+](=O)[O-])[N+](=O)[O-])cnn1CO[N+](=O)[O-]	1.59817	7.65378	23.0153	87.3692	181.808
Cc1c(N(CCO[N+](=O)[O-])[N+](=O)[O-])nn(CO[N+](=O)[O-])c1C	1.54495	7.31728	21.318	92.68	184.453
Cc1c(N(CCO[N+](=O)[O-])[N+](=O)[O-])nn(CO[N+](=O)[O-])c1CCO[N+](=O)[O-]	1.61147	7.52976	23.0656	83.9549	175.479
Cc1c(N(CCO[N+](=O)[O-])[N+](=O)[O-])nn(CO[N+](=O)[O-])c1CO[N+](=O)[O-]	1.64868	7.74723	25.2789	91.3982	174.109
Cc1c(N(CCO[N+](=O)[O-])[N+](=O)[O-])nn(CO[N+](=O)[O-])c1N(C)[N+](=O)[O-]	1.62612	7.73093	25.2641	113.251	190.207
Cc1c(N(CCO[N+](=O)[O-])[N+](=O)[O-])nn(CO[N+](=O)[O-])c1N(CCO[N+](=O)[O-])[N+](=O)[O-]	1.66911	7.89027	26.9561	114.664	198.565
Cc1c(N(CCO[N+](=O)[O-])[N+](=O)[O-])nn(CO[N+](=O)[O-])c1[N+](=O)[O-]	1.68412	7.92656	27.3728	106.555	184.627
Cc1c([N+](=O)[O-])c(CCO[N+](=O)[O-])nn1CO[N+](=O)[O-]	1.60973	7.57952	22.6878	91.4381	195.417
Cc1c([N+](=O)[O-])c(CO[N+](=O)[O-])nn1CO[N+](=O)[O-]	1.6493	7.77526	25.6162	98.0496	197.11
Cc1c([N+](=O)[O-])c(N(C)[N+](=O)[O-])nn1CO[N+](=O)[O-]	1.63602	7.80927	25.1619	105.078	187.986
Cc1c([N+](=O)[O-])c(N(CCO[N+](=O)[O-])[N+](=O)[O-])nn1CO[N+](=O)[O-]	1.67911	7.87867	27.1396	108.389	185.809
Cc1c([N+](=O)[O-])c([N+](=O)[O-])nn1CO[N+](=O)[O-]	1.70005	8.07581	27.8135	102.011	204.387
Cc1c([N+](=O)[O-])cnn1CO[N+](=O)[O-]	1.59552	7.62663	22.6826	94.49	212.258
Cc1c([N+](=O)[O-])nn(CO[N+](=O)[O-])c1C	1.53115	7.29119	20.0057	93.4742	218.909
Cc1c([N+](=O)[O-])nn(CO[N+](=O)[O-])c1CCO[N+](=O)[O-]	1.60573	7.5536	22.861	89.0464	196.203
Cc1c([N+](=O)[O-])nn(CO[N+](=O)[O-])c1CO[N+](=O)[O-]	1.65293	7.81659	25.7494	96.0781	192.642
Cc1c([N+](=O)[O-])nn(CO[N+](=O)[O-])c1N(C)[N+](=O)[O-]	1.63181	7.77954	25.2509	112.388	188.996
Cc1c([N+](=O)[O-])nn(CO[N+](=O)[O-])c1N(CCO[N+](=O)[O-])[N+](=O)[O-]	1.67713	7.95241	27.0888	105.461	191.817
Cc1c([N+](=O)[O-])nn(CO[N+](=O)[O-])c1[N+](=O)[O-]	1.7111	8.14908	28.2847	100.273	204.154
Cc1cc(C)n(CO[N+](=O)[O-])n1	1.39603	6.64631	13.0814	62.7648	230.635
Cc1cc(CCO[N+](=O)[O-])n(CO[N+](=O)[O-])n1	1.50196	7.10821	18.0275	67.1521	194.146
Cc1cc(CCO[N+](=O)[O-])nn1CO[N+](=O)[O-]	1.5062	7.12659	17.7157	74.503	196.005
Cc1cc(CO[N+](=O)[O-])n(CO[N+](=O)[O-])n1	1.54753	7.33948	21.4662	74.4014	189.999
Cc1cc(CO[N+](=O)[O-])nn1CO[N+](=O)[O-]	1.55491	7.43221	20.7158	78.9456	189.02
Cc1cc(N(C)[N+](=O)[O-])n(CO[N+](=O)[O-])n1	1.52151	7.29691	20.6685	89.4965	190.86
Cc1cc(N(C)[N+](=O)[O-])nn1CO[N+](=O)[O-]	1.53811	7.36596	20.5225	84.5791	194.27
Cc1cc(N(CCO[N+](=O)[O-])[N+](=O)[O-])n(CO[N+](=O)[O-])n1	1.59555	7.58974	23.5392	89.3506	188.53
Cc1cc(N(CCO[N+](=O)[O-])[N+](=O)[O-])nn1CO[N+](=O)[O-]	1.60721	7.63776	23.433	82.787	179.29
Cc1cc([N+](=O)[O-])n(CO[N+](=O)[O-])n1	1.58933	7.59487	23.2507	87.2567	216.513
Cc1cc([N+](=O)[O-])nn1CO[N+](=O)[O-]	1.60316	7.615	22.9306	93.9859	215.748
Cc1ccn(CO[N+](=O)[O-])n1	1.45966	6.94962	15.8784	67.3287	218.125
Cc1ccnn1CO[N+](=O)[O-]	1.44637	6.91795	15.9611	54.0782	216.751
Cc1cn(CO[N+](=O)[O-])nc1C	1.39907	6.66733	13.0669	69.2628	235.365
Cc1cn(CO[N+](=O)[O-])nc1CCO[N+](=O)[O-]	1.50019	7.10981	17.9658	69.5511	195.63
Cc1cn(CO[N+](=O)[O-])nc1CO[N+](=O)[O-]	1.55467	7.43782	20.7893	76.4842	188.94
Cc1cn(CO[N+](=O)[O-])nc1N(C)[N+](=O)[O-]	1.53219	7.37546	20.4935	91.7647	198.518
Cc1cn(CO[N+](=O)[O-])nc1N(CCO[N+](=O)[O-])[N+](=O)[O-]	1.59759	7.55683	23.5404	87.7973	184.585
Cc1cn(CO[N+](=O)[O-])nc1[N+](=O)[O-]	1.60372	7.61765	22.9162	94.6052	215.318
Cc1cnn(CO[N+](=O)[O-])c1	1.45276	6.93933	16.0091	58.5796	217.365
Cc1cnn(CO[N+](=O)[O-])c1C	1.39769	6.65862	13.0727	66.4727	234.141
Cc1cnn(CO[N+](=O)[O-])c1CCO[N+](=O)[O-]	1.49749	7.08646	18.0881	70.6449	197.537
Cc1cnn(CO[N+](=O)[O-])c1CO[N+](=O)[O-]	1.54206	7.35259	21.1517	80.4012	196.869
Cc1cnn(CO[N+](=O)[O-])c1N(C)[N+](=O)[O-]	1.5316	7.34604	20.6953	82.9339	192.244
Cc1cnn(CO[N+](=O)[O-])c1N(CCO[N+](=O)[O-])[N+](=O)[O-]	1.5992	7.55983	23.9587	84.6211	189.2
Cc1cnn(CO[N+](=O)[O-])c1[N+](=O)[O-]	1.59319	7.60916	23.1402	86.1791	215.812
Cc1nn(CO[N+](=O)[O-])c(C)c1C	1.35266	6.43906	10.9187	71.0284	242.831
Cc1nn(CO[N+](=O)[O-])c(C)c1CCO[N+](=O)[O-]	1.45397	6.92978	15.6022	79.7068	206.741
Cc1nn(CO[N+](=O)[O-])c(C)c1CO[N+](=O)[O-]	1.50216	7.16837	18.3622	81.2094	199.602
Cc1nn(CO[N+](=O)[O-])c(C)c1N(C)[N+](=O)[O-]	1.48598	7.13146	17.8825	92.3482	206.243
Cc1nn(CO[N+](=O)[O-])c(C)c1N(CCO[N+](=O)[O-])[N+](=O)[O-]	1.5436	7.41055	20.8953	91.8267	193
Cc1nn(CO[N+](=O)[O-])c(C)c1[N+](=O)[O-]	1.5325	7.30648	19.7812	92.9147	217.612
Cc1nn(CO[N+](=O)[O-])c(CCO[N+](=O)[O-])c1C	1.44499	6.8516	16.0531	83.6079	199.285
Cc1nn(CO[N+](=O)[O-])c(CCO[N+](=O)[O-])c1CCO[N+](=O)[O-]	1.53408	7.15599	18.5996	78.8976	183.568
Cc1nn(CO[N+](=O)[O-])c(CCO[N+](=O)[O-])c1CO[N+](=O)[O-]	1.57115	7.34185	20.9906	88.8924	187.232
Cc1nn(CO[N+](=O)[O-])c(CCO[N+](=O)[O-])c1N(C)[N+](=O)[O-]	1.54091	7.25712	20.8035	104.523	192.863
Cc1nn(CO[N+](=O)[O-])c(CCO[N+](=O)[O-])c1N(CCO[N+](=O)[O-])[N+](=O)[O-]	1.60674	7.54386	23.1504	87.4495	182.402
Cc1nn(CO[N+](=O)[O-])c(CCO[N+](=O)[O-])c1[N+](=O)[O-]	1.59768	7.48474	22.7022	98.9738	202.258
Cc1nn(CO[N+](=O)[O-])c(CO[N+](=O)[O-])c1C	1.49492	7.15849	18.6828	79.6088	195.899
Cc1nn(CO[N+](=O)[O-])c(CO[N+](=O)[O-])c1CCO[N+](=O)[O-]	1.57523	7.40316	21.0707	78.9211	177.066
Cc1nn(CO[N+](=O)[O-])c(CO[N+](=O)[O-])c1CO[N+](=O)[O-]	1.61532	7.63773	23.5512	85.4763	179.881
Cc1nn(CO[N+](=O)[O-])c(CO[N+](=O)[O-])c1N(C)[N+](=O)[O-]	1.58867	7.5829	23.3244	98.266	185.554
Cc1nn(CO[N+](=O)[O-])c(CO[N+](=O)[O-])c1N(CCO[N+](=O)[O-])[N+](=O)[O-]	1.64673	7.72923	25.4441	93.8941	180.666
Cc1nn(CO[N+](=O)[O-])c(CO[N+](=O)[O-])c1[N+](=O)[O-]	1.65541	7.81322	25.8509	92.3054	190.073
Cc1nn(CO[N+](=O)[O-])c(N(C)[N+](=O)[O-])c1C	1.47246	7.06806	18.2423	95.0785	194.468
Cc1nn(CO[N+](=O)[O-])c(N(C)[N+](=O)[O-])c1CCO[N+](=O)[O-]	1.54776	7.39742	20.8203	90.4689	191.041
Cc1nn(CO[N+](=O)[O-])c(N(C)[N+](=O)[O-])c1CO[N+](=O)[O-]	1.59133	7.59906	23.5788	94.1116	189.128
Cc1nn(CO[N+](=O)[O-])c(N(C)[N+](=O)[O-])c1N(C)[N+](=O)[O-]	1.57319	7.56473	23.165	121.811	201.114
Cc1nn(CO[N+](=O)[O-])c(N(C)[N+](=O)[O-])c1N(CCO[N+](=O)[O-])[N+](=O)[O-]	1.6235	7.77252	25.4347	110.3	195.63
Cc1nn(CO[N+](=O)[O-])c(N(C)[N+](=O)[O-])c1[N+](=O)[O-]	1.63654	7.80469	25.4036	102.958	189.24
Cc1nn(CO[N+](=O)[O-])c(N(CCO[N+](=O)[O-])[N+](=O)[O-])c1C	1.54365	7.38084	21.4298	92.1864	194.515
Cc1nn(CO[N+](=O)[O-])c(N(CCO[N+](=O)[O-])[N+](=O)[O-])c1CCO[N+](=O)[O-]	1.60671	7.46748	23.1079	100.11	188.04
Cc1nn(CO[N+](=O)[O-])c(N(CCO[N+](=O)[O-])[N+](=O)[O-])c1CO[N+](=O)[O-]	1.64637	7.75334	25.6725	90.2272	180.917
Cc1nn(CO[N+](=O)[O-])c(N(CCO[N+](=O)[O-])[N+](=O)[O-])c1N(C)[N+](=O)[O-]	1.6189	7.67549	25.3341	128.933	209.608
Cc1nn(CO[N+](=O)[O-])c(N(CCO[N+](=O)[O-])[N+](=O)[O-])c1N(CCO[N+](=O)[O-])[N+](=O)[O-]	1.66928	7.8476	27.1245	122.562	207.204
Cc1nn(CO[N+](=O)[O-])c(N(CCO[N+](=O)[O-])[N+](=O)[O-])c1[N+](=O)[O-]	1.67878	7.90064	27.3382	106.433	196.234
Cc1nn(CO[N+](=O)[O-])c([N+](=O)[O-])c1C	1.53044	7.29608	20.3665	92.3203	217.261
Cc1nn(CO[N+](=O)[O-])c([N+](=O)[O-])c1CCO[N+](=O)[O-]	1.60946	7.61178	23.0044	92.5302	197.989
Cc1nn(CO[N+](=O)[O-])c([N+](=O)[O-])c1CO[N+](=O)[O-]	1.6624	7.8888	25.9472	94.3837	189.921
Cc1nn(CO[N+](=O)[O-])c([N+](=O)[O-])c1N(C)[N+](=O)[O-]	1.63781	7.84338	25.441	108.034	193.343
Cc1nn(CO[N+](=O)[O-])c([N+](=O)[O-])c1N(CCO[N+](=O)[O-])[N+](=O)[O-]	1.67436	8.01637	27.1183	103.493	188.581
Cc1nn(CO[N+](=O)[O-])c([N+](=O)[O-])c1[N+](=O)[O-]	1.70969	8.1178	28.2537	104.451	203.091
Cc1nn(CO[N+](=O)[O-])cc1CCO[N+](=O)[O-]	1.50615	7.13875	17.6388	77.3869	197.515
Cc1nn(CO[N+](=O)[O-])cc1CO[N+](=O)[O-]	1.55438	7.43505	20.7481	76.0648	189.41
Cc1nn(CO[N+](=O)[O-])cc1N(C)[N+](=O)[O-]	1.53764	7.38193	20.4004	85.9462	194.341
Cc1nn(CO[N+](=O)[O-])cc1N(CCO[N+](=O)[O-])[N+](=O)[O-]	1.59385	7.55699	23.3122	95.5064	193.942
Cc1nn(CO[N+](=O)[O-])cc1[N+](=O)[O-]	1.5964	7.63006	22.7626	92.5102	211.595
O=[N+]([O-])OCCN(c1c(CO[N+](=O)[O-])c(CO[N+](=O)[O-])nn1CO[N+](=O)[O-])[N+](=O)[O-]	1.74184	8.10907	28.9236	86.9186	163.203
O=[N+]([O-])OCCN(c1c(CO[N+](=O)[O-])c([N+](=O)[O-])nn1CO[N+](=O)[O-])[N+](=O)[O-]	1.76402	8.2643	31.1803	102.946	191.052
O=[N+]([O-])OCCN(c1c(CO[N+](=O)[O-])cnn1CO[N+](=O)[O-])[N+](=O)[O-]	1.70594	8.02939	27.8269	83.2255	171.093
O=[N+]([O-])OCCN(c1c(CO[N+](=O)[O-])nn(CO[N+](=O)[O-])c1CO[N+](=O)[O-])[N+](=O)[O-]	1.73651	8.04816	28.8944	109.387	187.783
O=[N+]([O-])OCCN(c1c(CO[N+](=O)[O-])nn(CO[N+](=O)[O-])c1N(CCO[N+](=O)[O-])[N+](=O)[O-])[N+](=O)[O-]	1.75595	8.20973	30.2738	117.521	191.794
O=[N+]([O-])OCCN(c1c(CO[N+](=O)[O-])nn(CO[N+](=O)[O-])c1[N+](=O)[O-])[N+](=O)[O-]	1.76713	8.28864	31.1323	101.23	187.273
O=[N+]([O-])OCCN(c1c([N+](=O)[O-])c(CO[N+](=O)[O-])nn1CO[N+](=O)[O-])[N+](=O)[O-]	1.765	8.32497	31.3285	106.616	185.74
O=[N+]([O-])OCCN(c1c([N+](=O)[O-])c([N+](=O)[O-])nn1CO[N+](=O)[O-])[N+](=O)[O-]	1.80678	8.51108	33.0946	107.099	188.056
O=[N+]([O-])OCCN(c1c([N+](=O)[O-])cnn1CO[N+](=O)[O-])[N+](=O)[O-]	1.74432	8.21128	30.0001	99.6393	193.533
O=[N+]([O-])OCCN(c1c([N+](=O)[O-])nn(CO[N+](=O)[O-])c1CO[N+](=O)[O-])[N+](=O)[O-]	1.75632	8.29939	30.9831	102.621	185.928
O=[N+]([O-])OCCN(c1c([N+](=O)[O-])nn(CO[N+](=O)[O-])c1N(CCO[N+](=O)[O-])[N+](=O)[O-])[N+](=O)[O-]	1.7799	8.30136	32.2595	121.289	195.367
O=[N+]([O-])OCCN(c1c([N+](=O)[O-])nn(CO[N+](=O)[O-])c1[N+](=O)[O-])[N+](=O)[O-]	1.80809	8.56085	33.2742	106.699	188.157
O=[N+]([O-])OCCN(c1cc(CO[N+](=O)[O-])n(CO[N+](=O)[O-])n1)[N+](=O)[O-]	1.71003	8.03587	27.5363	80.5531	164.51
O=[N+]([O-])OCCN(c1cc(CO[N+](=O)[O-])nn1CO[N+](=O)[O-])[N+](=O)[O-]	1.70581	7.97479	27.6563	93.7988	181.681
O=[N+]([O-])OCCN(c1cc(N(CCO[N+](=O)[O-])[N+](=O)[O-])n(CO[N+](=O)[O-])n1)[N+](=O)[O-]	1.73212	8.01575	29.0356	118.703	194.202
O=[N+]([O-])OCCN(c1cc([N+](=O)[O-])n(CO[N+](=O)[O-])n1)[N+](=O)[O-]	1.74762	8.27462	29.9061	97.93	183.901
O=[N+]([O-])OCCN(c1cc([N+](=O)[O-])nn1CO[N+](=O)[O-])[N+](=O)[O-]	1.73595	8.18621	29.7792	108.655	203.215
O=[N+]([O-])OCCN(c1ccn(CO[N+](=O)[O-])n1)[N+](=O)[O-]	1.67266	7.92071	25.9713	78.0686	166.672
O=[N+]([O-])OCCN(c1ccnn1CO[N+](=O)[O-])[N+](=O)[O-]	1.67328	7.93116	26.2126	75.6917	167.033
O=[N+]([O-])OCCN(c1cn(CO[N+](=O)[O-])nc1CO[N+](=O)[O-])[N+](=O)[O-]	1.70435	8.02534	27.4785	85.7907	170.947
O=[N+]([O-])OCCN(c1cn(CO[N+](=O)[O-])nc1N(CCO[N+](=O)[O-])[N+](=O)[O-])[N+](=O)[O-]	1.72886	8.05557	29.0059	112.864	194.049
O=[N+]([O-])OCCN(c1cn(CO[N+](=O)[O-])nc1[N+](=O)[O-])[N+](=O)[O-]	1.73434	8.27168	29.6061	98.2296	179.942
O=[N+]([O-])OCCN(c1cnn(CO[N+](=O)[O-])c1)[N+](=O)[O-]	1.6661	7.8749	25.9311	80.0476	177.068
O=[N+]([O-])OCCN(c1cnn(CO[N+](=O)[O-])c1CO[N+](=O)[O-])[N+](=O)[O-]	1.70141	8.04453	27.5765	87.1661	170.479
O=[N+]([O-])OCCN(c1cnn(CO[N+](=O)[O-])c1N(CCO[N+](=O)[O-])[N+](=O)[O-])[N+](=O)[O-]	1.73052	8.13149	29.3917	103.744	186.31
O=[N+]([O-])OCCN(c1cnn(CO[N+](=O)[O-])c1[N+](=O)[O-])[N+](=O)[O-]	1.74363	8.28583	29.9301	94.8517	181.066
O=[N+]([O-])OCCN(c1nn(CO[N+](=O)[O-])c(CO[N+](=O)[O-])c1CO[N+](=O)[O-])[N+](=O)[O-]	1.74419	8.03672	28.7566	91.3281	161.607
O=[N+]([O-])OCCN(c1nn(CO[N+](=O)[O-])c(CO[N+](=O)[O-])c1N(CCO[N+](=O)[O-])[N+](=O)[O-])[N+](=O)[O-]	1.75975	8.0859	30.1403	118.865	191.996
O=[N+]([O-])OCCN(c1nn(CO[N+](=O)[O-])c(CO[N+](=O)[O-])c1[N+](=O)[O-])[N+](=O)[O-]	1.77605	8.29764	31.0261	95.5802	174.567
O=[N+]([O-])OCCN(c1nn(CO[N+](=O)[O-])c(N(CCO[N+](=O)[O-])[N+](=O)[O-])c1CO[N+](=O)[O-])[N+](=O)[O-]	1.76121	8.17404	30.2789	102.706	176.505
O=[N+]([O-])OCCN(c1nn(CO[N+](=O)[O-])c(N(CCO[N+](=O)[O-])[N+](=O)[O-])c1N(CCO[N+](=O)[O-])[N+](=O)[O-])[N+](=O)[O-]	1.77728	8.25129	32.4099	132.468	204.586
O=[N+]([O-])OCCN(c1nn(CO[N+](=O)[O-])c(N(CCO[N+](=O)[O-])[N+](=O)[O-])c1[N+](=O)[O-])[N+](=O)[O-]	1.77881	8.45223	32.5237	122.809	191.821
O=[N+]([O-])OCCN(c1nn(CO[N+](=O)[O-])c([N+](=O)[O-])c1CO[N+](=O)[O-])[N+](=O)[O-]	1.77488	8.25625	31.0001	104.805	178.852
O=[N+]([O-])OCCN(c1nn(CO[N+](=O)[O-])c([N+](=O)[O-])c1N(CCO[N+](=O)[O-])[N+](=O)[O-])[N+](=O)[O-]	1.79022	8.33616	32.3157	110.501	178.401
O=[N+]([O-])OCCN(c1nn(CO[N+](=O)[O-])c([N+](=O)[O-])c1[N+](=O)[O-])[N+](=O)[O-]	1.81206	8.5231	33.297	108.895	187.151
O=[N+]([O-])OCCN(c1nn(CO[N+](=O)[O-])cc1CO[N+](=O)[O-])[N+](=O)[O-]	1.69668	8.02575	27.6163	94.5155	175.733
O=[N+]([O-])OCCN(c1nn(CO[N+](=O)[O-])cc1[N+](=O)[O-])[N+](=O)[O-]	1.74798	8.23658	29.7683	97.7157	183.337
O=[N+]([O-])OCCc1c(CO[N+](=O)[O-])c(CO[N+](=O)[O-])nn1CO[N+](=O)[O-]	1.6833	7.73493	25.0213	84.7598	162.315
O=[N+]([O-])OCCc1c(CO[N+](=O)[O-])c(N(CCO[N+](=O)[O-])[N+](=O)[O-])nn1CO[N+](=O)[O-]	1.70747	7.80914	26.6669	86.8842	163.037
O=[N+]([O-])OCCc1c(CO[N+](=O)[O-])c([N+](=O)[O-])nn1CO[N+](=O)[O-]	1.70633	7.90427	27.0642	98.9834	189.264
O=[N+]([O-])OCCc1c(CO[N+](=O)[O-])cnn1CO[N+](=O)[O-]	1.6311	7.62871	23.1674	73.4686	173.588
O=[N+]([O-])OCCc1c(CO[N+](=O)[O-])nn(CO[N+](=O)[O-])c1CCO[N+](=O)[O-]	1.64377	7.4534	22.857	93.0195	172.043
O=[N+]([O-])OCCc1c(CO[N+](=O)[O-])nn(CO[N+](=O)[O-])c1CO[N+](=O)[O-]	1.68313	7.71542	25.098	88.1517	164.862
O=[N+]([O-])OCCc1c(CO[N+](=O)[O-])nn(CO[N+](=O)[O-])c1N(CCO[N+](=O)[O-])[N+](=O)[O-]	1.70414	7.84885	26.9402	98.7035	182.792
O=[N+]([O-])OCCc1c(CO[N+](=O)[O-])nn(CO[N+](=O)[O-])c1[N+](=O)[O-]	1.71283	7.96202	27.2677	94.3828	187.707
O=[N+]([O-])OCCc1c(N(CCO[N+](=O)[O-])[N+](=O)[O-])c(CO[N+](=O)[O-])nn1CO[N+](=O)[O-]	1.69933	7.85247	26.69	105.393	186.657
O=[N+]([O-])OCCc1c(N(CCO[N+](=O)[O-])[N+](=O)[O-])c(N(CCO[N+](=O)[O-])[N+](=O)[O-])nn1CO[N+](=O)[O-]	1.72372	7.9694	28.452	109.919	189.13
O=[N+]([O-])OCCc1c(N(CCO[N+](=O)[O-])[N+](=O)[O-])c([N+](=O)[O-])nn1CO[N+](=O)[O-]	1.72392	8.02804	28.4665	95.0068	183.608
O=[N+]([O-])OCCc1c(N(CCO[N+](=O)[O-])[N+](=O)[O-])cnn1CO[N+](=O)[O-]	1.66615	7.76648	25.0971	79.5871	171.578
O=[N+]([O-])OCCc1c(N(CCO[N+](=O)[O-])[N+](=O)[O-])nn(CO[N+](=O)[O-])c1CCO[N+](=O)[O-]	1.67172	7.61606	24.564	87.846	172.271
O=[N+]([O-])OCCc1c(N(CCO[N+](=O)[O-])[N+](=O)[O-])nn(CO[N+](=O)[O-])c1CO[N+](=O)[O-]	1.70574	7.78123	26.5877	101.405	177.935
O=[N+]([O-])OCCc1c(N(CCO[N+](=O)[O-])[N+](=O)[O-])nn(CO[N+](=O)[O-])c1N(CCO[N+](=O)[O-])[N+](=O)[O-]	1.7214	7.96406	28.6799	123.516	203.228
O=[N+]([O-])OCCc1c(N(CCO[N+](=O)[O-])[N+](=O)[O-])nn(CO[N+](=O)[O-])c1[N+](=O)[O-]	1.73064	8.05018	28.7038	99.2757	187.245
O=[N+]([O-])OCCc1c([N+](=O)[O-])c(CO[N+](=O)[O-])nn1CO[N+](=O)[O-]	1.71694	7.97067	27.2545	86.2424	177.049
O=[N+]([O-])OCCc1c([N+](=O)[O-])c(N(CCO[N+](=O)[O-])[N+](=O)[O-])nn1CO[N+](=O)[O-]	1.73469	8.0634	28.5896	93.1784	176.45
O=[N+]([O-])OCCc1c([N+](=O)[O-])c([N+](=O)[O-])nn1CO[N+](=O)[O-]	1.74197	8.165	29.1148	97.6831	201.388
O=[N+]([O-])OCCc1c([N+](=O)[O-])cnn1CO[N+](=O)[O-]	1.66238	7.76793	25.4618	90.7867	204.326
O=[N+]([O-])OCCc1c([N+](=O)[O-])nn(CO[N+](=O)[O-])c1CCO[N+](=O)[O-]	1.66354	7.73643	24.592	84.0353	185.719
O=[N+]([O-])OCCc1c([N+](=O)[O-])nn(CO[N+](=O)[O-])c1CO[N+](=O)[O-]	1.70221	7.96454	27.0217	91.0154	188.883
O=[N+]([O-])OCCc1c([N+](=O)[O-])nn(CO[N+](=O)[O-])c1N(CCO[N+](=O)[O-])[N+](=O)[O-]	1.73049	8.05643	28.7885	93.1977	178.61
O=[N+]([O-])OCCc1c([N+](=O)[O-])nn(CO[N+](=O)[O-])c1[N+](=O)[O-]	1.75675	8.25599	29.7772	94.6588	189.35
O=[N+]([O-])OCCc1cc(CCO[N+](=O)[O-])n(CO[N+](=O)[O-])n1	1.5851	7.31618	20.5231	74.9998	180.875
O=[N+]([O-])OCCc1cc(CO[N+](=O)[O-])n(CO[N+](=O)[O-])n1	1.62919	7.60526	23.1597	75.7227	177.141
O=[N+]([O-])OCCc1cc(CO[N+](=O)[O-])nn1CO[N+](=O)[O-]	1.63141	7.58058	23.2266	74.362	175.021
O=[N+]([O-])OCCc1cc(N(CCO[N+](=O)[O-])[N+](=O)[O-])n(CO[N+](=O)[O-])n1	1.66014	7.78773	24.9639	88.0608	177.904
O=[N+]([O-])OCCc1cc(N(CCO[N+](=O)[O-])[N+](=O)[O-])nn1CO[N+](=O)[O-]	1.66339	7.75438	24.9619	83.9202	174.663
O=[N+]([O-])OCCc1cc([N+](=O)[O-])n(CO[N+](=O)[O-])n1	1.66948	7.87322	25.4852	85.2755	193.512
O=[N+]([O-])OCCc1cc([N+](=O)[O-])nn1CO[N+](=O)[O-]	1.65948	7.82387	25.0744	89.7462	202.177
O=[N+]([O-])OCCc1ccn(CO[N+](=O)[O-])n1	1.56052	7.42379	20.0716	76.4445	178.955
O=[N+]([O-])OCCc1ccnn1CO[N+](=O)[O-]	1.56217	7.34984	20.6934	60.6586	190.477
O=[N+]([O-])OCCc1cn(CO[N+](=O)[O-])nc1CCO[N+](=O)[O-]	1.58687	7.34208	20.5681	72.7694	178.83
O=[N+]([O-])OCCc1cn(CO[N+](=O)[O-])nc1CO[N+](=O)[O-]	1.63237	7.63628	23.1503	72.3978	169.884
O=[N+]([O-])OCCc1cn(CO[N+](=O)[O-])nc1N(CCO[N+](=O)[O-])[N+](=O)[O-]	1.6574	7.78034	25.0865	89.7821	178.79
O=[N+]([O-])OCCc1cn(CO[N+](=O)[O-])nc1[N+](=O)[O-]	1.66894	7.85536	25.2222	86.1636	190.873
O=[N+]([O-])OCCc1cnn(CO[N+](=O)[O-])c1	1.56159	7.41607	20.1482	70.7831	182.118
O=[N+]([O-])OCCc1cnn(CO[N+](=O)[O-])c1CCO[N+](=O)[O-]	1.58804	7.33224	20.7033	71.6102	178.583
O=[N+]([O-])OCCc1cnn(CO[N+](=O)[O-])c1CO[N+](=O)[O-]	1.63375	7.63985	23.2752	71.0964	169.944
O=[N+]([O-])OCCc1cnn(CO[N+](=O)[O-])c1N(CCO[N+](=O)[O-])[N+](=O)[O-]	1.66602	7.78845	25.331	79.4101	171.663
O=[N+]([O-])OCCc1cnn(CO[N+](=O)[O-])c1[N+](=O)[O-]	1.66832	7.89705	25.3812	92.0646	190.236
O=[N+]([O-])OCCc1nn(CO[N+](=O)[O-])c(CCO[N+](=O)[O-])c1CCO[N+](=O)[O-]	1.61021	7.26567	20.6471	89.4733	175.297
O=[N+]([O-])OCCc1nn(CO[N+](=O)[O-])c(CCO[N+](=O)[O-])c1CO[N+](=O)[O-]	1.64143	7.55619	22.6315	80.8567	166.41
O=[N+]([O-])OCCc1nn(CO[N+](=O)[O-])c(CCO[N+](=O)[O-])c1N(CCO[N+](=O)[O-])[N+](=O)[O-]	1.66295	7.65182	24.9004	107.15	190.299
O=[N+]([O-])OCCc1nn(CO[N+](=O)[O-])c(CCO[N+](=O)[O-])c1[N+](=O)[O-]	1.67235	7.69903	24.7926	86.0958	184.677
O=[N+]([O-])OCCc1nn(CO[N+](=O)[O-])c(CO[N+](=O)[O-])c1CCO[N+](=O)[O-]	1.64553	7.50146	22.7403	91.8707	179.228
O=[N+]([O-])OCCc1nn(CO[N+](=O)[O-])c(CO[N+](=O)[O-])c1CO[N+](=O)[O-]	1.68492	7.75036	25.1247	78.7272	157.404
O=[N+]([O-])OCCc1nn(CO[N+](=O)[O-])c(CO[N+](=O)[O-])c1N(CCO[N+](=O)[O-])[N+](=O)[O-]	1.70538	7.7867	26.7166	97.5967	177.431
O=[N+]([O-])OCCc1nn(CO[N+](=O)[O-])c(CO[N+](=O)[O-])c1[N+](=O)[O-]	1.71424	8.02299	27.0937	88.5107	176.443
O=[N+]([O-])OCCc1nn(CO[N+](=O)[O-])c(N(CCO[N+](=O)[O-])[N+](=O)[O-])c1CCO[N+](=O)[O-]	1.67303	7.63703	24.6307	110.571	196.168
O=[N+]([O-])OCCc1nn(CO[N+](=O)[O-])c(N(CCO[N+](=O)[O-])[N+](=O)[O-])c1CO[N+](=O)[O-]	1.70667	7.80366	26.7166	98.0859	175.453
O=[N+]([O-])OCCc1nn(CO[N+](=O)[O-])c(N(CCO[N+](=O)[O-])[N+](=O)[O-])c1N(CCO[N+](=O)[O-])[N+](=O)[O-]	1.72898	7.88748	28.1392	130.113	205.104
O=[N+]([O-])OCCc1nn(CO[N+](=O)[O-])c(N(CCO[N+](=O)[O-])[N+](=O)[O-])c1[N+](=O)[O-]	1.73502	8.03149	28.6646	97.1909	181.802
O=[N+]([O-])OCCc1nn(CO[N+](=O)[O-])c([N+](=O)[O-])c1CCO[N+](=O)[O-]	1.67091	7.6794	24.9536	89.1673	186.879
O=[N+]([O-])OCCc1nn(CO[N+](=O)[O-])c([N+](=O)[O-])c1CO[N+](=O)[O-]	1.71359	7.96816	27.3103	89.1959	183.225
O=[N+]([O-])OCCc1nn(CO[N+](=O)[O-])c([N+](=O)[O-])c1N(CCO[N+](=O)[O-])[N+](=O)[O-]	1.72885	8.03773	28.6719	99.2332	187.304
O=[N+]([O-])OCCc1nn(CO[N+](=O)[O-])c([N+](=O)[O-])c1[N+](=O)[O-]	1.75137	8.23969	29.5572	92.3837	191.807
O=[N+]([O-])OCCc1nn(CO[N+](=O)[O-])cc1CO[N+](=O)[O-]	1.63021	7.58594	23.2577	77.2673	178.031
O=[N+]([O-])OCCc1nn(CO[N+](=O)[O-])cc1N(CCO[N+](=O)[O-])[N+](=O)[O-]	1.66614	7.74305	25.1031	82.055	173.544
O=[N+]([O-])OCCc1nn(CO[N+](=O)[O-])cc1[N+](=O)[O-]	1.66944	7.87303	25.2292	87.3997	191.415
O=[N+]([O-])OCc1c([N+](=O)[O-])c([N+](=O)[O-])nn1CO[N+](=O)[O-]	1.80072	8.47468	32.386	97.0738	190.008
O=[N+]([O-])OCc1c([N+](=O)[O-])cnn1CO[N+](=O)[O-]	1.71974	8.12449	28.5143	91.19	199.945
O=[N+]([O-])OCc1c([N+](=O)[O-])nn(CO[N+](=O)[O-])c1CO[N+](=O)[O-]	1.75677	8.22351	29.8625	91.1996	179.388
O=[N+]([O-])OCc1c([N+](=O)[O-])nn(CO[N+](=O)[O-])c1[N+](=O)[O-]	1.81148	8.53982	32.771	95.6556	184.011
O=[N+]([O-])OCc1cc(CO[N+](=O)[O-])n(CO[N+](=O)[O-])n1	1.68181	7.91669	25.9647	74.9834	165.71
O=[N+]([O-])OCc1cc([N+](=O)[O-])n(CO[N+](=O)[O-])n1	1.73054	8.20382	28.6933	92.884	185.985
O=[N+]([O-])OCc1cc([N+](=O)[O-])nn1CO[N+](=O)[O-]	1.72112	8.12181	28.7629	91.0608	194.796
O=[N+]([O-])OCc1ccn(CO[N+](=O)[O-])n1	1.62657	7.74025	23.5993	80.1265	175.111
O=[N+]([O-])OCc1ccnn1CO[N+](=O)[O-]	1.61632	7.68381	24.058	66.6267	189.284
O=[N+]([O-])OCc1cn(CO[N+](=O)[O-])nc1CO[N+](=O)[O-]	1.6825	7.91991	25.925	75.3953	164.024
O=[N+]([O-])OCc1cn(CO[N+](=O)[O-])nc1[N+](=O)[O-]	1.72478	8.15333	28.6127	85.616	187.703
O=[N+]([O-])OCc1cnn(CO[N+](=O)[O-])c1	1.62327	7.75008	23.5103	80.0254	176.109
O=[N+]([O-])OCc1cnn(CO[N+](=O)[O-])c1CO[N+](=O)[O-]	1.68162	7.92302	26.0487	74.5254	166.43
O=[N+]([O-])OCc1cnn(CO[N+](=O)[O-])c1[N+](=O)[O-]	1.72453	8.20924	28.6315	91.6122	185.024
O=[N+]([O-])OCc1nn(CO[N+](=O)[O-])c(CO[N+](=O)[O-])c1CO[N+](=O)[O-]	1.72284	7.99379	27.4414	86.0774	164.388
O=[N+]([O-])OCc1nn(CO[N+](=O)[O-])c(CO[N+](=O)[O-])c1[N+](=O)[O-]	1.76444	8.25068	29.913	89.0683	172.843
O=[N+]([O-])OCc1nn(CO[N+](=O)[O-])c([N+](=O)[O-])c1CO[N+](=O)[O-]	1.76492	8.26545	30.1229	88.5802	171.618
O=[N+]([O-])OCc1nn(CO[N+](=O)[O-])c([N+](=O)[O-])c1[N+](=O)[O-]	1.80577	8.54079	32.4666	96.3503	187.05
O=[N+]([O-])OCc1nn(CO[N+](=O)[O-])cc1[N+](=O)[O-]	1.73141	8.14798	28.7615	84.8239	186.928
O=[N+]([O-])OCn1cc([N+](=O)[O-])c([N+](=O)[O-])n1	1.78303	8.51477	31.3386	98.7131	199.223
O=[N+]([O-])OCn1cc([N+](=O)[O-])cn1	1.67827	8.00689	26.4035	88.5747	203.188
O=[N+]([O-])OCn1ccc([N+](=O)[O-])n1	1.68257	7.99562	26.4217	89.7141	205.057
O=[N+]([O-])OCn1nc([N+](=O)[O-])c([N+](=O)[O-])c1[N+](=O)[O-]	1.85997	8.81051	35.3762	99.7289	197.668
O=[N+]([O-])OCn1nc([N+](=O)[O-])cc1[N+](=O)[O-]	1.77943	8.47249	31.538	98.7887	209.626
O=[N+]([O-])OCn1ncc([N+](=O)[O-])c1[N+](=O)[O-]	1.78113	8.48448	31.5945	100.351	202.168
O=[N+]([O-])OCn1nccc1[N+](=O)[O-]	1.6791	7.98993	26.9023	79.6112	209.231
CN(c1c(CCO[N+](=O)[O-])c(CCO[N+](=O)[O-])nn1CCO[N+](=O)[O-])[N+](=O)[O-]	1.57268	7.20144	20.3648	101.038	187.601
CN(c1c(CCO[N+](=O)[O-])c(CO[N+](=O)[O-])nn1CCO[N+](=O)[O-])[N+](=O)[O-]	1.60833	7.50147	22.5158	92.63	184.244
CN(c1c(CCO[N+](=O)[O-])c(N(CCO[N+](=O)[O-])[N+](=O)[O-])nn1CCO[N+](=O)[O-])[N+](=O)[O-]	1.6386	7.64794	24.7489	102.341	191.536
CN(c1c(CCO[N+](=O)[O-])c([N+](=O)[O-])nn1CCO[N+](=O)[O-])[N+](=O)[O-]	1.62289	7.66694	24.3366	112.92	209.119
CN(c1c(CCO[N+](=O)[O-])cnn1CCO[N+](=O)[O-])[N+](=O)[O-]	1.55321	7.26933	20.4166	89.998	194.88
CN(c1c(CCO[N+](=O)[O-])nn(CCO[N+](=O)[O-])c1CCO[N+](=O)[O-])[N+](=O)[O-]	1.5732	7.24953	20.3141	94.052	185.181
CN(c1c(CCO[N+](=O)[O-])nn(CCO[N+](=O)[O-])c1CO[N+](=O)[O-])[N+](=O)[O-]	1.60913	7.4918	22.5258	93.0234	181.165
CN(c1c(CCO[N+](=O)[O-])nn(CCO[N+](=O)[O-])c1N(C)[N+](=O)[O-])[N+](=O)[O-]	1.58747	7.46209	22.5972	108.756	196.078
CN(c1c(CCO[N+](=O)[O-])nn(CCO[N+](=O)[O-])c1N(CCO[N+](=O)[O-])[N+](=O)[O-])[N+](=O)[O-]	1.63757	7.52651	24.4344	126.706	205.519
CN(c1c(CCO[N+](=O)[O-])nn(CCO[N+](=O)[O-])c1[N+](=O)[O-])[N+](=O)[O-]	1.63475	7.68312	24.2045	102.414	193.022
CN(c1c(CO[N+](=O)[O-])c(CCO[N+](=O)[O-])nn1CCO[N+](=O)[O-])[N+](=O)[O-]	1.60916	7.48529	22.5394	94.6247	183.14
CN(c1c(CO[N+](=O)[O-])c(CO[N+](=O)[O-])nn1CCO[N+](=O)[O-])[N+](=O)[O-]	1.65153	7.71195	24.9398	87.6823	171.041
CN(c1c(CO[N+](=O)[O-])c(N(CCO[N+](=O)[O-])[N+](=O)[O-])nn1CCO[N+](=O)[O-])[N+](=O)[O-]	1.67318	7.77874	26.2918	120.061	192.49
CN(c1c(CO[N+](=O)[O-])c([N+](=O)[O-])nn1CCO[N+](=O)[O-])[N+](=O)[O-]	1.67236	7.92763	26.6264	108.211	195.624
CN(c1c(CO[N+](=O)[O-])cnn1CCO[N+](=O)[O-])[N+](=O)[O-]	1.59774	7.61628	22.8627	88.9632	183.276
CN(c1c(CO[N+](=O)[O-])nn(CCO[N+](=O)[O-])c1CCO[N+](=O)[O-])[N+](=O)[O-]	1.61004	7.50656	22.542	87.0632	177.446
CN(c1c(CO[N+](=O)[O-])nn(CCO[N+](=O)[O-])c1CO[N+](=O)[O-])[N+](=O)[O-]	1.64458	7.67266	24.5166	109.977	186.929
CN(c1c(CO[N+](=O)[O-])nn(CCO[N+](=O)[O-])c1N(C)[N+](=O)[O-])[N+](=O)[O-]	1.62235	7.64706	24.5006	122.804	188.815
CN(c1c(CO[N+](=O)[O-])nn(CCO[N+](=O)[O-])c1N(CCO[N+](=O)[O-])[N+](=O)[O-])[N+](=O)[O-]	1.67587	7.81643	26.5344	109.002	185.783
CN(c1c(CO[N+](=O)[O-])nn(CCO[N+](=O)[O-])c1[N+](=O)[O-])[N+](=O)[O-]	1.6825	7.97246	26.9289	98.3168	182.675
CN(c1c(N(CCO[N+](=O)[O-])[N+](=O)[O-])c(CCO[N+](=O)[O-])nn1CCO[N+](=O)[O-])[N+](=O)[O-]	1.63449	7.61065	24.6405	122.339	210.427
CN(c1c(N(CCO[N+](=O)[O-])[N+](=O)[O-])c(CO[N+](=O)[O-])nn1CCO[N+](=O)[O-])[N+](=O)[O-]	1.66738	7.8425	26.7302	117.101	201.419
CN(c1c(N(CCO[N+](=O)[O-])[N+](=O)[O-])c(N(CCO[N+](=O)[O-])[N+](=O)[O-])nn1CCO[N+](=O)[O-])[N+](=O)[O-]	1.69602	7.86423	28.6248	145.598	223.036
CN(c1c(N(CCO[N+](=O)[O-])[N+](=O)[O-])c([N+](=O)[O-])nn1CCO[N+](=O)[O-])[N+](=O)[O-]	1.70197	8.02711	28.3495	114.524	186.875
CN(c1c(N(CCO[N+](=O)[O-])[N+](=O)[O-])cnn1CCO[N+](=O)[O-])[N+](=O)[O-]	1.64131	7.77444	25.0606	99.4872	186.23
CN(c1c(N(CCO[N+](=O)[O-])[N+](=O)[O-])nn(CCO[N+](=O)[O-])c1CCO[N+](=O)[O-])[N+](=O)[O-]	1.63963	7.60313	24.5985	103.641	189.475
CN(c1c(N(CCO[N+](=O)[O-])[N+](=O)[O-])nn(CCO[N+](=O)[O-])c1CO[N+](=O)[O-])[N+](=O)[O-]	1.67016	7.85453	26.5964	108.831	192.187
CN(c1c(N(CCO[N+](=O)[O-])[N+](=O)[O-])nn(CCO[N+](=O)[O-])c1N(C)[N+](=O)[O-])[N+](=O)[O-]	1.65171	7.70344	26.3449	151.953	211.105
CN(c1c(N(CCO[N+](=O)[O-])[N+](=O)[O-])nn(CCO[N+](=O)[O-])c1N(CCO[N+](=O)[O-])[N+](=O)[O-])[N+](=O)[O-]	1.69959	7.87253	28.3014	136.808	210.577
CN(c1c(N(CCO[N+](=O)[O-])[N+](=O)[O-])nn(CCO[N+](=O)[O-])c1[N+](=O)[O-])[N+](=O)[O-]	1.70841	8.07585	28.6435	110.16	184.748
CN(c1c([N+](=O)[O-])c(CCO[N+](=O)[O-])nn1CCO[N+](=O)[O-])[N+](=O)[O-]	1.64063	7.69116	24.3499	97.3332	187.614
CN(c1c([N+](=O)[O-])c(CO[N+](=O)[O-])nn1CCO[N+](=O)[O-])[N+](=O)[O-]	1.68006	7.86387	26.733	108.572	186.261
CN(c1c([N+](=O)[O-])c(N(CCO[N+](=O)[O-])[N+](=O)[O-])nn1CCO[N+](=O)[O-])[N+](=O)[O-]	1.70244	7.93061	28.0692	132.081	192.019
CN(c1c([N+](=O)[O-])c([N+](=O)[O-])nn1CCO[N+](=O)[O-])[N+](=O)[O-]	1.72224	8.15149	28.7756	112.634	187.645
CN(c1c([N+](=O)[O-])cnn1CCO[N+](=O)[O-])[N+](=O)[O-]	1.64717	7.81968	24.9339	98.6369	191.804
CN(c1c([N+](=O)[O-])nn(CCO[N+](=O)[O-])c1CCO[N+](=O)[O-])[N+](=O)[O-]	1.63408	7.68433	24.1319	96.1602	187.899
CN(c1c([N+](=O)[O-])nn(CCO[N+](=O)[O-])c1CO[N+](=O)[O-])[N+](=O)[O-]	1.67574	7.87305	26.6651	106.472	186.879
CN(c1c([N+](=O)[O-])nn(CCO[N+](=O)[O-])c1N(C)[N+](=O)[O-])[N+](=O)[O-]	1.65927	7.92077	26.282	129.143	191.393
CN(c1c([N+](=O)[O-])nn(CCO[N+](=O)[O-])c1N(CCO[N+](=O)[O-])[N+](=O)[O-])[N+](=O)[O-]	1.69756	7.98378	28.2929	123.69	197.771
CN(c1c([N+](=O)[O-])nn(CCO[N+](=O)[O-])c1[N+](=O)[O-])[N+](=O)[O-]	1.72608	8.20462	29.0643	112.742	188.396
CN(c1cc(CCO[N+](=O)[O-])n(CCO[N+](=O)[O-])n1)[N+](=O)[O-]	1.55698	7.27509	20.304	84.5704	185.278
CN(c1cc(CCO[N+](=O)[O-])nn1CCO[N+](=O)[O-])[N+](=O)[O-]	1.55706	7.30362	20.2743	83.5509	186.093
CN(c1cc(CO[N+](=O)[O-])n(CCO[N+](=O)[O-])n1)[N+](=O)[O-]	1.60053	7.54349	22.8848	87.7729	182.442
CN(c1cc(CO[N+](=O)[O-])nn1CCO[N+](=O)[O-])[N+](=O)[O-]	1.59259	7.48071	22.8251	102.144	188.344
CN(c1cc(N(C)[N+](=O)[O-])n(CCO[N+](=O)[O-])n1)[N+](=O)[O-]	1.57309	7.48653	22.4144	125.561	197.56
CN(c1cc(N(CCO[N+](=O)[O-])[N+](=O)[O-])n(CCO[N+](=O)[O-])n1)[N+](=O)[O-]	1.63497	7.66583	24.9475	115.386	199.166
CN(c1cc(N(CCO[N+](=O)[O-])[N+](=O)[O-])nn1CCO[N+](=O)[O-])[N+](=O)[O-]	1.63699	7.65977	24.9029	114.551	192.952
CN(c1cc([N+](=O)[O-])n(CCO[N+](=O)[O-])n1)[N+](=O)[O-]	1.6407	7.78769	24.9482	103.131	197.727
CN(c1cc([N+](=O)[O-])nn1CCO[N+](=O)[O-])[N+](=O)[O-]	1.63421	7.75907	24.6784	106.677	199.793
CN(c1ccn(CCO[N+](=O)[O-])n1)[N+](=O)[O-]	1.54722	7.33455	19.8625	81.3652	189.721
CN(c1ccnn1CCO[N+](=O)[O-])[N+](=O)[O-]	1.52215	7.27352	19.7422	90.4876	201.804
CN(c1cn(CCO[N+](=O)[O-])nc1CCO[N+](=O)[O-])[N+](=O)[O-]	1.55331	7.27408	20.2404	87.7606	191.194
CN(c1cn(CCO[N+](=O)[O-])nc1CO[N+](=O)[O-])[N+](=O)[O-]	1.60572	7.56698	22.8671	81.9883	178.151
CN(c1cn(CCO[N+](=O)[O-])nc1N(C)[N+](=O)[O-])[N+](=O)[O-]	1.58948	7.575	22.7069	105.801	191.714
CN(c1cn(CCO[N+](=O)[O-])nc1N(CCO[N+](=O)[O-])[N+](=O)[O-])[N+](=O)[O-]	1.63103	7.63786	24.8114	122.827	204.558
CN(c1cn(CCO[N+](=O)[O-])nc1[N+](=O)[O-])[N+](=O)[O-]	1.64065	7.80875	24.5501	101.117	191.945
CN(c1cnn(CCO[N+](=O)[O-])c1)[N+](=O)[O-]	1.54288	7.34211	19.7682	84.0317	191.513
CN(c1cnn(CCO[N+](=O)[O-])c1CCO[N+](=O)[O-])[N+](=O)[O-]	1.55332	7.28418	20.0954	89.0161	189.957
CN(c1cnn(CCO[N+](=O)[O-])c1CO[N+](=O)[O-])[N+](=O)[O-]	1.59865	7.54782	22.8853	89.1402	186.789
CN(c1cnn(CCO[N+](=O)[O-])c1N(C)[N+](=O)[O-])[N+](=O)[O-]	1.58572	7.5681	22.6748	107.873	192.161
CN(c1cnn(CCO[N+](=O)[O-])c1N(CCO[N+](=O)[O-])[N+](=O)[O-])[N+](=O)[O-]	1.63693	7.71561	25.1	107.828	194.673
CN(c1cnn(CCO[N+](=O)[O-])c1[N+](=O)[O-])[N+](=O)[O-]	1.64137	7.84029	24.8729	104.931	194.809
CN(c1nn(CCO[N+](=O)[O-])c(CCO[N+](=O)[O-])c1CCO[N+](=O)[O-])[N+](=O)[O-]	1.57238	7.19308	20.4069	99.7307	189.218
CN(c1nn(CCO[N+](=O)[O-])c(CCO[N+](=O)[O-])c1CO[N+](=O)[O-])[N+](=O)[O-]	1.61099	7.43396	22.6007	90.989	175.809
CN(c1nn(CCO[N+](=O)[O-])c(CCO[N+](=O)[O-])c1N(C)[N+](=O)[O-])[N+](=O)[O-]	1.5783	7.38132	22.0423	132.685	206.988
CN(c1nn(CCO[N+](=O)[O-])c(CCO[N+](=O)[O-])c1N(CCO[N+](=O)[O-])[N+](=O)[O-])[N+](=O)[O-]	1.63986	7.60961	24.4736	101.417	188.029
CN(c1nn(CCO[N+](=O)[O-])c(CCO[N+](=O)[O-])c1[N+](=O)[O-])[N+](=O)[O-]	1.63785	7.62923	24.3002	100.962	190.843
CN(c1nn(CCO[N+](=O)[O-])c(CO[N+](=O)[O-])c1CCO[N+](=O)[O-])[N+](=O)[O-]	1.61079	7.4533	22.6479	91.7042	178.015
CN(c1nn(CCO[N+](=O)[O-])c(CO[N+](=O)[O-])c1CO[N+](=O)[O-])[N+](=O)[O-]	1.64899	7.71186	24.8692	90.8379	174.765
CN(c1nn(CCO[N+](=O)[O-])c(CO[N+](=O)[O-])c1N(C)[N+](=O)[O-])[N+](=O)[O-]	1.62625	7.666	24.7306	113.632	187.19
CN(c1nn(CCO[N+](=O)[O-])c(CO[N+](=O)[O-])c1N(CCO[N+](=O)[O-])[N+](=O)[O-])[N+](=O)[O-]	1.67499	7.75381	26.5142	112.666	184.771
CN(c1nn(CCO[N+](=O)[O-])c(CO[N+](=O)[O-])c1[N+](=O)[O-])[N+](=O)[O-]	1.677	7.84351	26.6155	113.31	188.85
CN(c1nn(CCO[N+](=O)[O-])c(N(C)[N+](=O)[O-])c1CCO[N+](=O)[O-])[N+](=O)[O-]	1.58453	7.50436	22.5504	112.474	199.61
CN(c1nn(CCO[N+](=O)[O-])c(N(C)[N+](=O)[O-])c1CO[N+](=O)[O-])[N+](=O)[O-]	1.62584	7.73072	24.8469	111.113	191.387
CN(c1nn(CCO[N+](=O)[O-])c(N(C)[N+](=O)[O-])c1N(C)[N+](=O)[O-])[N+](=O)[O-]	1.60812	7.66818	24.5407	153.043	215.263
CN(c1nn(CCO[N+](=O)[O-])c(N(C)[N+](=O)[O-])c1N(CCO[N+](=O)[O-])[N+](=O)[O-])[N+](=O)[O-]	1.64389	7.81022	26.8209	164.19	240.187
CN(c1nn(CCO[N+](=O)[O-])c(N(C)[N+](=O)[O-])c1[N+](=O)[O-])[N+](=O)[O-]	1.66453	7.88556	26.4653	127.32	188.112
CN(c1nn(CCO[N+](=O)[O-])c(N(CCO[N+](=O)[O-])[N+](=O)[O-])c1CCO[N+](=O)[O-])[N+](=O)[O-]	1.63777	7.64865	24.6068	107.716	195.06
CN(c1nn(CCO[N+](=O)[O-])c(N(CCO[N+](=O)[O-])[N+](=O)[O-])c1CO[N+](=O)[O-])[N+](=O)[O-]	1.6753	7.81261	26.7041	108.114	188.072
CN(c1nn(CCO[N+](=O)[O-])c(N(CCO[N+](=O)[O-])[N+](=O)[O-])c1N(C)[N+](=O)[O-])[N+](=O)[O-]	1.64886	7.72976	26.4344	159.601	227.218
CN(c1nn(CCO[N+](=O)[O-])c(N(CCO[N+](=O)[O-])[N+](=O)[O-])c1N(CCO[N+](=O)[O-])[N+](=O)[O-])[N+](=O)[O-]	1.69874	7.83413	28.2108	143.709	213.286
CN(c1nn(CCO[N+](=O)[O-])c(N(CCO[N+](=O)[O-])[N+](=O)[O-])c1[N+](=O)[O-])[N+](=O)[O-]	1.69905	7.91581	28.1662	136.662	209.14
CN(c1nn(CCO[N+](=O)[O-])c([N+](=O)[O-])c1CCO[N+](=O)[O-])[N+](=O)[O-]	1.6352	7.70213	24.3005	101.981	194.422
CN(c1nn(CCO[N+](=O)[O-])c([N+](=O)[O-])c1CO[N+](=O)[O-])[N+](=O)[O-]	1.68249	7.95042	26.9197	102.006	185.387
CN(c1nn(CCO[N+](=O)[O-])c([N+](=O)[O-])c1N(C)[N+](=O)[O-])[N+](=O)[O-]	1.66279	7.90587	26.7539	126.499	194.947
CN(c1nn(CCO[N+](=O)[O-])c([N+](=O)[O-])c1N(CCO[N+](=O)[O-])[N+](=O)[O-])[N+](=O)[O-]	1.69368	8.02576	28.3541	133.067	210.367
CN(c1nn(CCO[N+](=O)[O-])c([N+](=O)[O-])c1[N+](=O)[O-])[N+](=O)[O-]	1.72952	8.18904	29.104	111.559	186.13
CN(c1nn(CCO[N+](=O)[O-])cc1CCO[N+](=O)[O-])[N+](=O)[O-]	1.55965	7.34111	20.2262	80.4828	183.52
CN(c1nn(CCO[N+](=O)[O-])cc1CO[N+](=O)[O-])[N+](=O)[O-]	1.60136	7.58349	22.7576	84.4826	180.205
CN(c1nn(CCO[N+](=O)[O-])cc1N(CCO[N+](=O)[O-])[N+](=O)[O-])[N+](=O)[O-]	1.63701	7.68291	24.8075	108.898	190.747
CN(c1nn(CCO[N+](=O)[O-])cc1[N+](=O)[O-])[N+](=O)[O-]	1.63947	7.82477	24.6588	104.455	192.858
COc1c(C)c(C)nn1CCO[N+](=O)[O-]	1.3423	6.11703	10.18	66.2079	224.948
COc1c(C)c(CCO[N+](=O)[O-])nn1CCO[N+](=O)[O-]	1.43007	6.50989	14.4476	79.5038	190.546
COc1c(C)c(CO[N+](=O)[O-])nn1CCO[N+](=O)[O-]	1.47392	6.75931	16.4858	76.4914	192.821
COc1c(C)c(N(C)[N+](=O)[O-])nn1CCO[N+](=O)[O-]	1.45262	6.68949	15.9967	81.7894	203.333
COc1c(C)c(N(CCO[N+](=O)[O-])[N+](=O)[O-])nn1CCO[N+](=O)[O-]	1.5047	6.89733	19.2034	98.5856	184.506
COc1c(C)c([N+](=O)[O-])nn1CCO[N+](=O)[O-]	1.50978	6.88623	17.835	87.7004	213.942
COc1c(C)cnn1CCO[N+](=O)[O-]	1.38079	6.30326	11.6867	63.5791	228.018
COc1c(C)nn(CCO[N+](=O)[O-])c1C	1.33839	6.10434	9.56866	72.4645	237.291
COc1c(C)nn(CCO[N+](=O)[O-])c1CCO[N+](=O)[O-]	1.42973	6.50686	14.4666	79.7619	190.798
COc1c(C)nn(CCO[N+](=O)[O-])c1CO[N+](=O)[O-]	1.47135	6.73392	16.9556	80.9653	184.653
COc1c(C)nn(CCO[N+](=O)[O-])c1N(C)[N+](=O)[O-]	1.44752	6.66122	16.2433	85.5927	196.273
COc1c(C)nn(CCO[N+](=O)[O-])c1N(CCO[N+](=O)[O-])[N+](=O)[O-]	1.50929	6.93275	19.2434	83.4456	179.752
COc1c(C)nn(CCO[N+](=O)[O-])c1OC	1.36869	6.09341	11.3094	64.2222	210.208
COc1c(C)nn(CCO[N+](=O)[O-])c1[N+](=O)[O-]	1.50873	6.89974	18.0996	85.8544	211.174
COc1c(CCO[N+](=O)[O-])c(C)nn1CCO[N+](=O)[O-]	1.43515	6.53898	13.934	75.1166	202.878
COc1c(CCO[N+](=O)[O-])c(CCO[N+](=O)[O-])nn1CCO[N+](=O)[O-]	1.50674	6.70648	17.3101	90.1915	168.775
COc1c(CCO[N+](=O)[O-])c(CO[N+](=O)[O-])nn1CCO[N+](=O)[O-]	1.54493	6.97617	19.1296	79.6522	166.316
COc1c(CCO[N+](=O)[O-])c(N(C)[N+](=O)[O-])nn1CCO[N+](=O)[O-]	1.50749	6.9351	18.5147	89.646	185.42
COc1c(CCO[N+](=O)[O-])c(N(CCO[N+](=O)[O-])[N+](=O)[O-])nn1CCO[N+](=O)[O-]	1.56354	7.10972	20.8029	90.6759	175.249
COc1c(CCO[N+](=O)[O-])c([N+](=O)[O-])nn1CCO[N+](=O)[O-]	1.56669	7.14277	20.2556	90.6551	191.772
COc1c(CCO[N+](=O)[O-])cnn1CCO[N+](=O)[O-]	1.47773	6.72849	15.6685	71.7701	194.892
COc1c(CCO[N+](=O)[O-])nn(CCO[N+](=O)[O-])c1C	1.43294	6.53141	14.0273	74.5654	197.319
COc1c(CCO[N+](=O)[O-])nn(CCO[N+](=O)[O-])c1CCO[N+](=O)[O-]	1.50656	6.71234	17.1829	87.6842	170.347
COc1c(CCO[N+](=O)[O-])nn(CCO[N+](=O)[O-])c1CO[N+](=O)[O-]	1.53978	6.96935	19.0114	85.552	173.745
COc1c(CCO[N+](=O)[O-])nn(CCO[N+](=O)[O-])c1N(C)[N+](=O)[O-]	1.50702	6.93277	18.462	92.1241	183.819
COc1c(CCO[N+](=O)[O-])nn(CCO[N+](=O)[O-])c1N(CCO[N+](=O)[O-])[N+](=O)[O-]	1.56748	7.06587	21.0044	94.3705	169.785
COc1c(CCO[N+](=O)[O-])nn(CCO[N+](=O)[O-])c1OC	1.44384	6.39941	15.5313	81.09	163.055
COc1c(CCO[N+](=O)[O-])nn(CCO[N+](=O)[O-])c1[N+](=O)[O-]	1.57499	7.13495	20.8174	84.5133	186.67
COc1c(CO[N+](=O)[O-])c(C)nn1CCO[N+](=O)[O-]	1.47538	6.76108	16.382	76.4004	195.287
COc1c(CO[N+](=O)[O-])c(CCO[N+](=O)[O-])nn1CCO[N+](=O)[O-]	1.54456	6.95422	19.2604	82.5663	166.867
COc1c(CO[N+](=O)[O-])c(CO[N+](=O)[O-])nn1CCO[N+](=O)[O-]	1.57946	7.23348	20.9361	85.4626	166.649
COc1c(CO[N+](=O)[O-])c(N(C)[N+](=O)[O-])nn1CCO[N+](=O)[O-]	1.55409	7.16405	20.8302	82.136	178.806
COc1c(CO[N+](=O)[O-])c(N(CCO[N+](=O)[O-])[N+](=O)[O-])nn1CCO[N+](=O)[O-]	1.60152	7.25841	22.8715	102.089	166.968
COc1c(CO[N+](=O)[O-])c([N+](=O)[O-])nn1CCO[N+](=O)[O-]	1.61645	7.4083	22.886	88.2506	183.717
COc1c(CO[N+](=O)[O-])cnn1CCO[N+](=O)[O-]	1.52611	6.98776	18.1945	75.8661	192.772
COc1c(CO[N+](=O)[O-])nn(CCO[N+](=O)[O-])c1C	1.47028	6.76139	16.4327	79.257	190.491
COc1c(CO[N+](=O)[O-])nn(CCO[N+](=O)[O-])c1CCO[N+](=O)[O-]	1.54267	6.98731	18.9093	79.8169	167.984
COc1c(CO[N+](=O)[O-])nn(CCO[N+](=O)[O-])c1CO[N+](=O)[O-]	1.582	7.22118	21.1388	81.5201	165.019
COc1c(CO[N+](=O)[O-])nn(CCO[N+](=O)[O-])c1N(C)[N+](=O)[O-]	1.55023	7.14978	20.8755	89.9036	175.685
COc1c(CO[N+](=O)[O-])nn(CCO[N+](=O)[O-])c1N(CCO[N+](=O)[O-])[N+](=O)[O-]	1.60164	7.28152	23.0964	97.0734	174.081
COc1c(CO[N+](=O)[O-])nn(CCO[N+](=O)[O-])c1OC	1.48604	6.63669	17.6365	75.5095	160.834
COc1c(CO[N+](=O)[O-])nn(CCO[N+](=O)[O-])c1[N+](=O)[O-]	1.61701	7.41337	23.017	91.3706	184.555
COc1c(N(C)[N+](=O)[O-])c(C)nn1CCO[N+](=O)[O-]	1.44675	6.70713	15.5742	85.9995	209.262
COc1c(N(C)[N+](=O)[O-])c(CCO[N+](=O)[O-])nn1CCO[N+](=O)[O-]	1.50784	6.8605	18.7889	97.2645	175.656
COc1c(N(C)[N+](=O)[O-])c(CO[N+](=O)[O-])nn1CCO[N+](=O)[O-]	1.55211	7.16454	20.7901	84.8207	176.158
COc1c(N(C)[N+](=O)[O-])c(N(C)[N+](=O)[O-])nn1CCO[N+](=O)[O-]	1.52163	7.10312	20.2878	112.762	200.225
COc1c(N(C)[N+](=O)[O-])c(N(CCO[N+](=O)[O-])[N+](=O)[O-])nn1CCO[N+](=O)[O-]	1.57293	7.29578	22.5043	97.8949	184.763
COc1c(N(C)[N+](=O)[O-])c([N+](=O)[O-])nn1CCO[N+](=O)[O-]	1.58389	7.34371	22.1999	102.621	192.881
COc1c(N(C)[N+](=O)[O-])cnn1CCO[N+](=O)[O-]	1.49363	6.90444	17.8598	84.4246	203.715
COc1c(N(C)[N+](=O)[O-])nn(CCO[N+](=O)[O-])c1C	1.44881	6.67761	15.8722	83.5798	203.881
COc1c(N(C)[N+](=O)[O-])nn(CCO[N+](=O)[O-])c1CCO[N+](=O)[O-]	1.50573	6.88622	18.5391	99.8697	183.647
COc1c(N(C)[N+](=O)[O-])nn(CCO[N+](=O)[O-])c1CO[N+](=O)[O-]	1.54868	7.15643	20.7925	90.3922	178.168
COc1c(N(C)[N+](=O)[O-])nn(CCO[N+](=O)[O-])c1N(C)[N+](=O)[O-]	1.51844	7.06314	20.264	125.12	194.274
COc1c(N(C)[N+](=O)[O-])nn(CCO[N+](=O)[O-])c1N(CCO[N+](=O)[O-])[N+](=O)[O-]	1.57303	7.22324	22.7544	110.46	180.966
COc1c(N(C)[N+](=O)[O-])nn(CCO[N+](=O)[O-])c1OC	1.45244	6.55832	16.841	83.14	174.88
COc1c(N(C)[N+](=O)[O-])nn(CCO[N+](=O)[O-])c1[N+](=O)[O-]	1.58946	7.3199	22.7711	102.669	187.127
COc1c(N(CCO[N+](=O)[O-])[N+](=O)[O-])c(C)nn1CCO[N+](=O)[O-]	1.50287	6.97497	18.4979	85.6378	189.63
COc1c(N(CCO[N+](=O)[O-])[N+](=O)[O-])c(CCO[N+](=O)[O-])nn1CCO[N+](=O)[O-]	1.56689	7.01671	20.9718	98.6154	166.876
COc1c(N(CCO[N+](=O)[O-])[N+](=O)[O-])c(CO[N+](=O)[O-])nn1CCO[N+](=O)[O-]	1.60122	7.34276	22.8088	80.1148	164.581
COc1c(N(CCO[N+](=O)[O-])[N+](=O)[O-])c(N(C)[N+](=O)[O-])nn1CCO[N+](=O)[O-]	1.56719	7.28955	22.6012	104.901	192.886
COc1c(N(CCO[N+](=O)[O-])[N+](=O)[O-])c(N(CCO[N+](=O)[O-])[N+](=O)[O-])nn1CCO[N+](=O)[O-]	1.62118	7.3195	24.5003	107.789	171.538
COc1c(N(CCO[N+](=O)[O-])[N+](=O)[O-])c([N+](=O)[O-])nn1CCO[N+](=O)[O-]	1.62952	7.47954	24.4741	99.3404	181.575
COc1c(N(CCO[N+](=O)[O-])[N+](=O)[O-])cnn1CCO[N+](=O)[O-]	1.55736	7.17326	20.7493	80.7179	180.897
COc1c(N(CCO[N+](=O)[O-])[N+](=O)[O-])nn(CCO[N+](=O)[O-])c1C	1.50724	6.9115	19.1698	88.2938	177.905
COc1c(N(CCO[N+](=O)[O-])[N+](=O)[O-])nn(CCO[N+](=O)[O-])c1CCO[N+](=O)[O-]	1.56391	7.07708	20.828	99.4731	179.236
COc1c(N(CCO[N+](=O)[O-])[N+](=O)[O-])nn(CCO[N+](=O)[O-])c1CO[N+](=O)[O-]	1.60349	7.32123	22.8069	83.4638	163.105
COc1c(N(CCO[N+](=O)[O-])[N+](=O)[O-])nn(CCO[N+](=O)[O-])c1N(C)[N+](=O)[O-]	1.5701	7.28178	22.6383	104.327	189.364
COc1c(N(CCO[N+](=O)[O-])[N+](=O)[O-])nn(CCO[N+](=O)[O-])c1N(CCO[N+](=O)[O-])[N+](=O)[O-]	1.61767	7.35028	24.4845	124.963	192.678
COc1c(N(CCO[N+](=O)[O-])[N+](=O)[O-])nn(CCO[N+](=O)[O-])c1OC	1.51514	6.81618	19.3569	75.9003	164.099
COc1c(N(CCO[N+](=O)[O-])[N+](=O)[O-])nn(CCO[N+](=O)[O-])c1[N+](=O)[O-]	1.63264	7.45624	24.7524	103.719	186.474
COc1c([N+](=O)[O-])c(C)nn1CCO[N+](=O)[O-]	1.51096	6.87733	17.8252	86.9671	214.3
COc1c([N+](=O)[O-])c(CCO[N+](=O)[O-])nn1CCO[N+](=O)[O-]	1.57264	7.14766	20.3946	86.1257	190.291
COc1c([N+](=O)[O-])c(CO[N+](=O)[O-])nn1CCO[N+](=O)[O-]	1.61727	7.37786	23.06	90.947	185.096
COc1c([N+](=O)[O-])c(N(C)[N+](=O)[O-])nn1CCO[N+](=O)[O-]	1.59034	7.32285	22.5134	99.13	188.319
COc1c([N+](=O)[O-])c(N(CCO[N+](=O)[O-])[N+](=O)[O-])nn1CCO[N+](=O)[O-]	1.63841	7.49995	24.7087	90.0155	174.866
COc1c([N+](=O)[O-])c([N+](=O)[O-])nn1CCO[N+](=O)[O-]	1.66719	7.59396	25.1467	96.1836	198.435
COc1c([N+](=O)[O-])cnn1CCO[N+](=O)[O-]	1.56536	7.15239	19.9805	91.7359	217.667
COc1c([N+](=O)[O-])nn(CCO[N+](=O)[O-])c1C	1.49956	6.88028	17.4711	90.005	213.912
COc1c([N+](=O)[O-])nn(CCO[N+](=O)[O-])c1CCO[N+](=O)[O-]	1.56851	7.11148	20.5309	87.2628	187.126
COc1c([N+](=O)[O-])nn(CCO[N+](=O)[O-])c1CO[N+](=O)[O-]	1.61284	7.34799	23.28	95.26	181.489
COc1c([N+](=O)[O-])nn(CCO[N+](=O)[O-])c1N(C)[N+](=O)[O-]	1.58116	7.28996	22.4798	110.783	188.765
COc1c([N+](=O)[O-])nn(CCO[N+](=O)[O-])c1N(CCO[N+](=O)[O-])[N+](=O)[O-]	1.63659	7.4916	24.6551	91.6748	173.851
COc1c([N+](=O)[O-])nn(CCO[N+](=O)[O-])c1OC	1.52292	6.79461	18.4392	80.182	190.407
COc1c([N+](=O)[O-])nn(CCO[N+](=O)[O-])c1[N+](=O)[O-]	1.66285	7.62005	24.9903	95.9814	201.035
COc1cc(C)n(CCO[N+](=O)[O-])n1	1.3795	6.29524	11.6594	62.438	225.835
COc1cc(C)nn1CCO[N+](=O)[O-]	1.37823	6.29781	11.8955	61.3622	221.586
COc1cc(CCO[N+](=O)[O-])n(CCO[N+](=O)[O-])n1	1.47234	6.65166	16.4465	81.1011	189.911
COc1cc(CCO[N+](=O)[O-])nn1CCO[N+](=O)[O-]	1.47892	6.72304	15.8203	68.6269	192.544
COc1cc(CO[N+](=O)[O-])n(CCO[N+](=O)[O-])n1	1.52388	6.93366	19.1828	74.1412	185.214
COc1cc(CO[N+](=O)[O-])nn1CCO[N+](=O)[O-]	1.52961	6.97227	18.5152	70.6124	190.747
COc1cc(N(C)[N+](=O)[O-])n(CCO[N+](=O)[O-])n1	1.49476	6.8784	18.4053	83.0344	191.03
COc1cc(N(C)[N+](=O)[O-])nn1CCO[N+](=O)[O-]	1.50227	6.90234	18.2083	76.1071	195.689
COc1cc(N(CCO[N+](=O)[O-])[N+](=O)[O-])n(CCO[N+](=O)[O-])n1	1.55674	7.14782	21.1145	82.1079	184.106
COc1cc(N(CCO[N+](=O)[O-])[N+](=O)[O-])nn1CCO[N+](=O)[O-]	1.55745	7.14516	20.9111	83.3373	180.648
COc1cc(OC)n(CCO[N+](=O)[O-])n1	1.41502	6.26856	13.658	52.7814	201.355
COc1cc([N+](=O)[O-])n(CCO[N+](=O)[O-])n1	1.57083	7.16014	20.8869	80.2483	210.832
COc1cc([N+](=O)[O-])nn1CCO[N+](=O)[O-]	1.56782	7.14816	20.3586	82.9994	213.426
COc1ccn(CCO[N+](=O)[O-])n1	1.44441	6.55148	14.0744	58.0212	223.584
COc1ccnn1CCO[N+](=O)[O-]	1.44115	6.55242	14.1493	56.793	221.959
COc1cn(CCO[N+](=O)[O-])nc1C	1.38971	6.30792	11.7622	61.4243	230.596
COc1cn(CCO[N+](=O)[O-])nc1CCO[N+](=O)[O-]	1.47731	6.72186	15.6325	72.2635	195.808
COc1cn(CCO[N+](=O)[O-])nc1CO[N+](=O)[O-]	1.52912	6.96387	18.6468	69.3512	189.216
COc1cn(CCO[N+](=O)[O-])nc1N(C)[N+](=O)[O-]	1.49237	6.8911	17.9838	82.7217	198.019
COc1cn(CCO[N+](=O)[O-])nc1N(CCO[N+](=O)[O-])[N+](=O)[O-]	1.55478	7.08731	21.1643	95.3386	180.584
COc1cn(CCO[N+](=O)[O-])nc1OC	1.41756	6.27209	13.3567	56.3395	207.807
COc1cn(CCO[N+](=O)[O-])nc1[N+](=O)[O-]	1.5591	7.14131	20.0213	84.0138	211.753
COc1cnn(CCO[N+](=O)[O-])c1	1.44084	6.558	13.6647	69.2231	228.466
COc1cnn(CCO[N+](=O)[O-])c1C	1.37882	6.29883	11.3812	68.5758	231.934
COc1cnn(CCO[N+](=O)[O-])c1CCO[N+](=O)[O-]	1.47372	6.66008	16.5013	80.8894	189.902
COc1cnn(CCO[N+](=O)[O-])c1CO[N+](=O)[O-]	1.52453	6.96315	18.8555	72.23	187.621
COc1cnn(CCO[N+](=O)[O-])c1N(C)[N+](=O)[O-]	1.49832	6.89807	18.2972	78.788	194.38
COc1cnn(CCO[N+](=O)[O-])c1N(CCO[N+](=O)[O-])[N+](=O)[O-]	1.55214	7.14512	21.003	84.9916	186.493
COc1cnn(CCO[N+](=O)[O-])c1OC	1.41166	6.27118	13.24	60.5819	206.067
COc1cnn(CCO[N+](=O)[O-])c1[N+](=O)[O-]	1.56861	7.1704	20.336	85.3516	215.261
COc1nn(CCO[N+](=O)[O-])c(C)c1C	1.33969	6.10789	9.88262	68.4284	230.634
COc1nn(CCO[N+](=O)[O-])c(C)c1CCO[N+](=O)[O-]	1.4328	6.53554	13.8067	76.3396	203.018
COc1nn(CCO[N+](=O)[O-])c(C)c1CO[N+](=O)[O-]	1.47321	6.7522	16.2805	77.1087	194.313
COc1nn(CCO[N+](=O)[O-])c(C)c1N(C)[N+](=O)[O-]	1.45107	6.67781	15.8903	82.2078	199.199
COc1nn(CCO[N+](=O)[O-])c(C)c1N(CCO[N+](=O)[O-])[N+](=O)[O-]	1.50803	6.92676	18.8907	84.3793	181.747
COc1nn(CCO[N+](=O)[O-])c(C)c1OC	1.37149	6.07849	11.412	62.5322	210.269
COc1nn(CCO[N+](=O)[O-])c(C)c1[N+](=O)[O-]	1.50742	6.8666	17.7001	87.4663	213.894
COc1nn(CCO[N+](=O)[O-])c(CCO[N+](=O)[O-])c1C	1.43052	6.5056	14.5224	78.575	190.06
COc1nn(CCO[N+](=O)[O-])c(CCO[N+](=O)[O-])c1CCO[N+](=O)[O-]	1.50666	6.73834	16.858	94.4705	180.966
COc1nn(CCO[N+](=O)[O-])c(CCO[N+](=O)[O-])c1CO[N+](=O)[O-]	1.54593	6.9766	19.0466	75.3424	166.614
COc1nn(CCO[N+](=O)[O-])c(CCO[N+](=O)[O-])c1N(C)[N+](=O)[O-]	1.50896	6.89094	18.7162	92.5679	178.826
COc1nn(CCO[N+](=O)[O-])c(CCO[N+](=O)[O-])c1N(CCO[N+](=O)[O-])[N+](=O)[O-]	1.56757	7.0824	20.8998	84.9645	169.322
COc1nn(CCO[N+](=O)[O-])c(CCO[N+](=O)[O-])c1OC	1.44582	6.4009	15.5678	74.3238	162.955
COc1nn(CCO[N+](=O)[O-])c(CCO[N+](=O)[O-])c1[N+](=O)[O-]	1.56854	7.06176	20.8564	97.8062	186.606
COc1nn(CCO[N+](=O)[O-])c(CO[N+](=O)[O-])c1C	1.46407	6.70602	16.9711	95.8535	185.186
COc1nn(CCO[N+](=O)[O-])c(CO[N+](=O)[O-])c1CCO[N+](=O)[O-]	1.54037	6.96896	18.8562	90.3662	176.397
COc1nn(CCO[N+](=O)[O-])c(CO[N+](=O)[O-])c1CO[N+](=O)[O-]	1.58566	7.20194	21.487	78.1997	162.466
COc1nn(CCO[N+](=O)[O-])c(CO[N+](=O)[O-])c1N(C)[N+](=O)[O-]	1.55128	7.12363	21.1082	89.6449	173.715
COc1nn(CCO[N+](=O)[O-])c(CO[N+](=O)[O-])c1N(CCO[N+](=O)[O-])[N+](=O)[O-]	1.60142	7.32139	22.858	85.77	167.123
COc1nn(CCO[N+](=O)[O-])c(CO[N+](=O)[O-])c1OC	1.48463	6.61618	17.8945	78.1075	158.757
COc1nn(CCO[N+](=O)[O-])c(CO[N+](=O)[O-])c1[N+](=O)[O-]	1.62112	7.37242	23.3052	86.9631	182.284
COc1nn(CCO[N+](=O)[O-])c(N(C)[N+](=O)[O-])c1C	1.44041	6.6647	16.0614	95.1816	198.071
COc1nn(CCO[N+](=O)[O-])c(N(C)[N+](=O)[O-])c1CCO[N+](=O)[O-]	1.51403	6.92648	18.7872	82.1392	180.345
COc1nn(CCO[N+](=O)[O-])c(N(C)[N+](=O)[O-])c1CO[N+](=O)[O-]	1.55032	7.16643	20.8908	87.1619	178.512
COc1nn(CCO[N+](=O)[O-])c(N(C)[N+](=O)[O-])c1N(C)[N+](=O)[O-]	1.52818	7.0868	20.513	106.903	190.023
COc1nn(CCO[N+](=O)[O-])c(N(C)[N+](=O)[O-])c1N(CCO[N+](=O)[O-])[N+](=O)[O-]	1.57619	7.27536	22.7569	97.3028	182.163
COc1nn(CCO[N+](=O)[O-])c(N(C)[N+](=O)[O-])c1OC	1.455	6.54476	17.1223	79.3417	171.403
COc1nn(CCO[N+](=O)[O-])c(N(C)[N+](=O)[O-])c1[N+](=O)[O-]	1.59095	7.30575	22.7687	100.48	183.173
COc1nn(CCO[N+](=O)[O-])c(N(CCO[N+](=O)[O-])[N+](=O)[O-])c1C	1.50622	6.92215	19.2282	87.6379	190.482
COc1nn(CCO[N+](=O)[O-])c(N(CCO[N+](=O)[O-])[N+](=O)[O-])c1CCO[N+](=O)[O-]	1.56648	7.13235	20.9594	84.0537	170.173
COc1nn(CCO[N+](=O)[O-])c(N(CCO[N+](=O)[O-])[N+](=O)[O-])c1CO[N+](=O)[O-]	1.60206	7.29027	22.9704	97.6036	173.107
COc1nn(CCO[N+](=O)[O-])c(N(CCO[N+](=O)[O-])[N+](=O)[O-])c1N(C)[N+](=O)[O-]	1.56933	7.1929	22.7479	122.059	191.856
COc1nn(CCO[N+](=O)[O-])c(N(CCO[N+](=O)[O-])[N+](=O)[O-])c1N(CCO[N+](=O)[O-])[N+](=O)[O-]	1.61539	7.40524	24.562	115.657	190.366
COc1nn(CCO[N+](=O)[O-])c(N(CCO[N+](=O)[O-])[N+](=O)[O-])c1OC	1.51708	6.79896	19.6369	74.0366	161.955
COc1nn(CCO[N+](=O)[O-])c(N(CCO[N+](=O)[O-])[N+](=O)[O-])c1[N+](=O)[O-]	1.63411	7.49345	24.7371	93.8818	180.848
COc1nn(CCO[N+](=O)[O-])c(OC)c1C	1.36314	6.07092	11.8939	62.0132	193.599
COc1nn(CCO[N+](=O)[O-])c(OC)c1CCO[N+](=O)[O-]	1.45029	6.44656	14.827	71.9713	177.733
COc1nn(CCO[N+](=O)[O-])c(OC)c1CO[N+](=O)[O-]	1.49028	6.65442	17.3279	70.7338	167.183
COc1nn(CCO[N+](=O)[O-])c(OC)c1N(C)[N+](=O)[O-]	1.46091	6.58127	16.6377	75.5734	184.71
COc1nn(CCO[N+](=O)[O-])c(OC)c1N(CCO[N+](=O)[O-])[N+](=O)[O-]	1.51028	6.81439	19.119	101.042	174.014
COc1nn(CCO[N+](=O)[O-])c(OC)c1OC	1.38551	6.02545	13.0932	58.4648	172.088
COc1nn(CCO[N+](=O)[O-])c(OC)c1[N+](=O)[O-]	1.52913	6.77369	18.7061	77.2734	190.742
COc1nn(CCO[N+](=O)[O-])c([N+](=O)[O-])c1C	1.50513	6.88426	18.2475	88.1837	207.138
COc1nn(CCO[N+](=O)[O-])c([N+](=O)[O-])c1CCO[N+](=O)[O-]	1.57913	7.16097	20.6783	85.3058	192.267
COc1nn(CCO[N+](=O)[O-])c([N+](=O)[O-])c1CO[N+](=O)[O-]	1.61567	7.40157	23.0686	90.9195	188.189
COc1nn(CCO[N+](=O)[O-])c([N+](=O)[O-])c1N(C)[N+](=O)[O-]	1.59379	7.34918	22.7113	97.0164	190.693
COc1nn(CCO[N+](=O)[O-])c([N+](=O)[O-])c1N(CCO[N+](=O)[O-])[N+](=O)[O-]	1.64041	7.50704	24.8804	89.0498	174.949
COc1nn(CCO[N+](=O)[O-])c([N+](=O)[O-])c1OC	1.52401	6.78601	19.1455	76.3048	182.765
COc1nn(CCO[N+](=O)[O-])c([N+](=O)[O-])c1[N+](=O)[O-]	1.66796	7.60947	25.3249	96.0009	200.365
COc1nn(CCO[N+](=O)[O-])cc1C	1.38388	6.29899	11.9154	59.3886	224.897
COc1nn(CCO[N+](=O)[O-])cc1CCO[N+](=O)[O-]	1.47595	6.7294	15.625	71.5812	192.998
COc1nn(CCO[N+](=O)[O-])cc1CO[N+](=O)[O-]	1.52405	6.9691	18.5273	71.2828	187.75
COc1nn(CCO[N+](=O)[O-])cc1N(C)[N+](=O)[O-]	1.50208	6.89948	18.1313	76.191	194.495
COc1nn(CCO[N+](=O)[O-])cc1N(CCO[N+](=O)[O-])[N+](=O)[O-]	1.56294	7.1335	20.8963	76.5125	177.841
COc1nn(CCO[N+](=O)[O-])cc1[N+](=O)[O-]	1.56993	7.14692	20.1494	87.0497	216.168
Cc1c(CCO[N+](=O)[O-])c(CCO[N+](=O)[O-])nn1CCO[N+](=O)[O-]	1.49564	6.91874	16.1892	79.3907	188.063
Cc1c(CCO[N+](=O)[O-])c(CO[N+](=O)[O-])nn1CCO[N+](=O)[O-]	1.5323	7.11725	18.47	80.5308	182.667
Cc1c(CCO[N+](=O)[O-])c(N(C)[N+](=O)[O-])nn1CCO[N+](=O)[O-]	1.5119	7.09391	18.2937	84.8002	191.384
Cc1c(CCO[N+](=O)[O-])c(N(CCO[N+](=O)[O-])[N+](=O)[O-])nn1CCO[N+](=O)[O-]	1.57033	7.2907	20.8429	85.7253	184.723
Cc1c(CCO[N+](=O)[O-])c([N+](=O)[O-])nn1CCO[N+](=O)[O-]	1.55295	7.2862	19.7894	87.6433	203.271
Cc1c(CCO[N+](=O)[O-])cnn1CCO[N+](=O)[O-]	1.45632	6.85241	14.8274	69.1902	200.235
Cc1c(CCO[N+](=O)[O-])nn(CCO[N+](=O)[O-])c1C	1.41446	6.66025	13.2033	75.2505	211.27
Cc1c(CCO[N+](=O)[O-])nn(CCO[N+](=O)[O-])c1CCO[N+](=O)[O-]	1.49504	6.85545	16.3707	83.5991	188.473
Cc1c(CCO[N+](=O)[O-])nn(CCO[N+](=O)[O-])c1CO[N+](=O)[O-]	1.53184	7.13032	18.4618	81.7955	185.838
Cc1c(CCO[N+](=O)[O-])nn(CCO[N+](=O)[O-])c1N(C)[N+](=O)[O-]	1.50881	7.09088	18.4553	88.0178	193.364
Cc1c(CCO[N+](=O)[O-])nn(CCO[N+](=O)[O-])c1N(CCO[N+](=O)[O-])[N+](=O)[O-]	1.57161	7.19166	20.8723	95.2645	182.335
Cc1c(CCO[N+](=O)[O-])nn(CCO[N+](=O)[O-])c1[N+](=O)[O-]	1.56035	7.2884	20.1494	86.3451	203.186
Cc1c(CO[N+](=O)[O-])c(CCO[N+](=O)[O-])nn1CCO[N+](=O)[O-]	1.53152	7.09894	18.3611	81.51	183.806
Cc1c(CO[N+](=O)[O-])c(CO[N+](=O)[O-])nn1CCO[N+](=O)[O-]	1.5694	7.38592	20.6245	82.7587	180.547
Cc1c(CO[N+](=O)[O-])c(N(C)[N+](=O)[O-])nn1CCO[N+](=O)[O-]	1.5464	7.3457	20.4967	90.3003	189.218
Cc1c(CO[N+](=O)[O-])c(N(CCO[N+](=O)[O-])[N+](=O)[O-])nn1CCO[N+](=O)[O-]	1.59937	7.53964	22.9987	91.7241	184.525
Cc1c(CO[N+](=O)[O-])c([N+](=O)[O-])nn1CCO[N+](=O)[O-]	1.60127	7.54795	22.5407	89.0523	196.887
Cc1c(CO[N+](=O)[O-])cnn1CCO[N+](=O)[O-]	1.50732	7.11999	17.4991	77.9544	198.236
Cc1c(CO[N+](=O)[O-])nn(CCO[N+](=O)[O-])c1C	1.44906	6.90154	15.5358	79.5403	206.51
Cc1c(CO[N+](=O)[O-])nn(CCO[N+](=O)[O-])c1CCO[N+](=O)[O-]	1.53076	7.10784	18.3888	84.8356	185.849
Cc1c(CO[N+](=O)[O-])nn(CCO[N+](=O)[O-])c1CO[N+](=O)[O-]	1.57131	7.368	20.7675	84.2052	180.927
Cc1c(CO[N+](=O)[O-])nn(CCO[N+](=O)[O-])c1N(C)[N+](=O)[O-]	1.55116	7.32454	20.7838	88.9983	184.415
Cc1c(CO[N+](=O)[O-])nn(CCO[N+](=O)[O-])c1N(CCO[N+](=O)[O-])[N+](=O)[O-]	1.60676	7.50579	22.9397	93.2152	185.292
Cc1c(CO[N+](=O)[O-])nn(CCO[N+](=O)[O-])c1[N+](=O)[O-]	1.60503	7.55829	22.7793	90.215	198.722
Cc1c(N(C)[N+](=O)[O-])c(CCO[N+](=O)[O-])nn1CCO[N+](=O)[O-]	1.50114	7.10129	17.9479	97.1047	197.661
Cc1c(N(C)[N+](=O)[O-])c(CO[N+](=O)[O-])nn1CCO[N+](=O)[O-]	1.54567	7.36431	20.4716	91.1962	188.797
Cc1c(N(C)[N+](=O)[O-])c(N(C)[N+](=O)[O-])nn1CCO[N+](=O)[O-]	1.53055	7.32255	20.1509	113.556	201.238
Cc1c(N(C)[N+](=O)[O-])c(N(CCO[N+](=O)[O-])[N+](=O)[O-])nn1CCO[N+](=O)[O-]	1.5762	7.51452	22.8916	117.376	208.042
Cc1c(N(C)[N+](=O)[O-])c([N+](=O)[O-])nn1CCO[N+](=O)[O-]	1.58233	7.5157	22.0075	104.458	197.025
Cc1c(N(C)[N+](=O)[O-])cnn1CCO[N+](=O)[O-]	1.48433	7.08152	17.0418	89.0884	206.736
Cc1c(N(C)[N+](=O)[O-])nn(CCO[N+](=O)[O-])c1C	1.43993	6.84042	15.2535	87.3299	210.78
Cc1c(N(C)[N+](=O)[O-])nn(CCO[N+](=O)[O-])c1CCO[N+](=O)[O-]	1.50553	7.04381	18.2975	93.4549	190.482
Cc1c(N(C)[N+](=O)[O-])nn(CCO[N+](=O)[O-])c1CO[N+](=O)[O-]	1.5441	7.27992	20.6553	97.3887	184.887
Cc1c(N(C)[N+](=O)[O-])nn(CCO[N+](=O)[O-])c1N(C)[N+](=O)[O-]	1.52981	7.26168	20.4068	118.828	196.358
Cc1c(N(C)[N+](=O)[O-])nn(CCO[N+](=O)[O-])c1N(CCO[N+](=O)[O-])[N+](=O)[O-]	1.58463	7.40856	22.8172	115.533	190.831
Cc1c(N(C)[N+](=O)[O-])nn(CCO[N+](=O)[O-])c1[N+](=O)[O-]	1.58783	7.53007	22.3936	104.935	198.877
Cc1c(N(CCO[N+](=O)[O-])[N+](=O)[O-])c(CCO[N+](=O)[O-])nn1CCO[N+](=O)[O-]	1.57014	7.25794	20.7082	90.7884	187.367
Cc1c(N(CCO[N+](=O)[O-])[N+](=O)[O-])c(CO[N+](=O)[O-])nn1CCO[N+](=O)[O-]	1.60381	7.4547	22.5477	98.9692	185.058
Cc1c(N(CCO[N+](=O)[O-])[N+](=O)[O-])c(N(C)[N+](=O)[O-])nn1CCO[N+](=O)[O-]	1.57781	7.44842	22.5476	122.999	206.882
Cc1c(N(CCO[N+](=O)[O-])[N+](=O)[O-])c(N(CCO[N+](=O)[O-])[N+](=O)[O-])nn1CCO[N+](=O)[O-]	1.63485	7.5584	24.6068	111.888	195.229
Cc1c(N(CCO[N+](=O)[O-])[N+](=O)[O-])c([N+](=O)[O-])nn1CCO[N+](=O)[O-]	1.62911	7.68465	24.3066	97.7622	190.535
Cc1c(N(CCO[N+](=O)[O-])[N+](=O)[O-])cnn1CCO[N+](=O)[O-]	1.55003	7.3783	20.345	86.6443	187.652
Cc1c(N(CCO[N+](=O)[O-])[N+](=O)[O-])nn(CCO[N+](=O)[O-])c1C	1.50459	7.1124	18.7017	87.2267	192.951
Cc1c(N(CCO[N+](=O)[O-])[N+](=O)[O-])nn(CCO[N+](=O)[O-])c1CCO[N+](=O)[O-]	1.56904	7.2928	20.8786	91.1118	190.307
Cc1c(N(CCO[N+](=O)[O-])[N+](=O)[O-])nn(CCO[N+](=O)[O-])c1CO[N+](=O)[O-]	1.60635	7.42378	22.8706	97.5137	179.02
Cc1c(N(CCO[N+](=O)[O-])[N+](=O)[O-])nn(CCO[N+](=O)[O-])c1N(C)[N+](=O)[O-]	1.5842	7.48121	22.866	111.427	198.34
Cc1c(N(CCO[N+](=O)[O-])[N+](=O)[O-])nn(CCO[N+](=O)[O-])c1N(CCO[N+](=O)[O-])[N+](=O)[O-]	1.63748	7.59199	24.8027	110.005	195.482
Cc1c(N(CCO[N+](=O)[O-])[N+](=O)[O-])nn(CCO[N+](=O)[O-])c1[N+](=O)[O-]	1.63227	7.65048	24.5688	109.797	202.103
Cc1c([N+](=O)[O-])c(CCO[N+](=O)[O-])nn1CCO[N+](=O)[O-]	1.55445	7.21361	20.0384	91.4556	201.14
Cc1c([N+](=O)[O-])c(CO[N+](=O)[O-])nn1CCO[N+](=O)[O-]	1.60395	7.52198	22.6281	89.4519	195.139
Cc1c([N+](=O)[O-])c(N(C)[N+](=O)[O-])nn1CCO[N+](=O)[O-]	1.58332	7.52594	22.1598	105.235	199.021
Cc1c([N+](=O)[O-])c(N(CCO[N+](=O)[O-])[N+](=O)[O-])nn1CCO[N+](=O)[O-]	1.63261	7.73427	24.5113	100.469	190.298
Cc1c([N+](=O)[O-])c([N+](=O)[O-])nn1CCO[N+](=O)[O-]	1.64343	7.75632	24.3701	104.925	211.761
Cc1c([N+](=O)[O-])cnn1CCO[N+](=O)[O-]	1.5289	7.28182	18.8694	93.6214	220.462
Cc1c([N+](=O)[O-])nn(CCO[N+](=O)[O-])c1C	1.48292	6.99886	16.692	93.4179	230.222
Cc1c([N+](=O)[O-])nn(CCO[N+](=O)[O-])c1CCO[N+](=O)[O-]	1.55161	7.26416	19.7412	91.5803	205.633
Cc1c([N+](=O)[O-])nn(CCO[N+](=O)[O-])c1CO[N+](=O)[O-]	1.59765	7.48913	22.6657	96.8179	198.752
Cc1c([N+](=O)[O-])nn(CCO[N+](=O)[O-])c1N(C)[N+](=O)[O-]	1.58113	7.47405	22.2724	107.655	195.466
Cc1c([N+](=O)[O-])nn(CCO[N+](=O)[O-])c1N(CCO[N+](=O)[O-])[N+](=O)[O-]	1.62828	7.5966	24.5596	109.693	204.719
Cc1c([N+](=O)[O-])nn(CCO[N+](=O)[O-])c1[N+](=O)[O-]	1.64112	7.76248	24.5726	99.6117	215.155
Cc1cc(C)n(CCO[N+](=O)[O-])n1	1.33606	6.3342	9.71195	61.6151	236.421
Cc1cc(CCO[N+](=O)[O-])n(CCO[N+](=O)[O-])n1	1.4582	6.82177	15.1543	63.6749	198.33
Cc1cc(CCO[N+](=O)[O-])nn1CCO[N+](=O)[O-]	1.46248	6.8289	15.0081	67.5934	200.456
Cc1cc(CO[N+](=O)[O-])n(CCO[N+](=O)[O-])n1	1.49786	7.06074	18.0514	68.2786	195.573
Cc1cc(CO[N+](=O)[O-])nn1CCO[N+](=O)[O-]	1.50518	7.10779	17.5964	73.7091	195.994
Cc1cc(N(C)[N+](=O)[O-])n(CCO[N+](=O)[O-])n1	1.47661	7.00468	17.5723	82.844	197.133
Cc1cc(N(C)[N+](=O)[O-])nn1CCO[N+](=O)[O-]	1.48972	7.05328	17.3662	81.214	202.142
Cc1cc(N(CCO[N+](=O)[O-])[N+](=O)[O-])n(CCO[N+](=O)[O-])n1	1.54845	7.25594	21.0003	92.4289	199.591
Cc1cc(N(CCO[N+](=O)[O-])[N+](=O)[O-])nn1CCO[N+](=O)[O-]	1.55238	7.31519	20.6243	82.0994	186.64
Cc1cc([N+](=O)[O-])n(CCO[N+](=O)[O-])n1	1.52843	7.26118	19.4308	83.6838	222.75
Cc1cc([N+](=O)[O-])nn1CCO[N+](=O)[O-]	1.52892	7.2587	19.039	89.6352	222.347
Cc1ccn(CCO[N+](=O)[O-])n1	1.39292	6.5735	12.2844	51.2297	223.223
Cc1ccnn1CCO[N+](=O)[O-]	1.39589	6.5831	12.0877	59.055	225.557
Cc1cn(CCO[N+](=O)[O-])nc1C	1.34663	6.35876	9.73614	66.3502	242.924
Cc1cn(CCO[N+](=O)[O-])nc1CCO[N+](=O)[O-]	1.45932	6.85096	14.9368	70.048	200.613
Cc1cn(CCO[N+](=O)[O-])nc1CO[N+](=O)[O-]	1.50226	7.1285	17.5133	77.1185	195.745
Cc1cn(CCO[N+](=O)[O-])nc1N(C)[N+](=O)[O-]	1.48775	7.06788	17.3032	83.4607	203.038
Cc1cn(CCO[N+](=O)[O-])nc1N(CCO[N+](=O)[O-])[N+](=O)[O-]	1.55129	7.32815	20.5251	82.8774	186.886
Cc1cn(CCO[N+](=O)[O-])nc1[N+](=O)[O-]	1.53915	7.26302	19.153	90.319	222.482
Cc1cnn(CCO[N+](=O)[O-])c1	1.39321	6.5922	12.0965	61.1862	224.672
Cc1cnn(CCO[N+](=O)[O-])c1C	1.34533	6.35562	9.69888	66.7854	243.505
Cc1cnn(CCO[N+](=O)[O-])c1CCO[N+](=O)[O-]	1.45417	6.80345	15.1554	65.9738	200.185
Cc1cnn(CCO[N+](=O)[O-])c1CO[N+](=O)[O-]	1.49829	7.07354	17.9906	69.211	196.211
Cc1cnn(CCO[N+](=O)[O-])c1N(C)[N+](=O)[O-]	1.48321	7.04453	17.5375	79.8624	199.78
Cc1cnn(CCO[N+](=O)[O-])c1N(CCO[N+](=O)[O-])[N+](=O)[O-]	1.55424	7.35575	20.8814	81.0673	187.69
Cc1cnn(CCO[N+](=O)[O-])c1[N+](=O)[O-]	1.53429	7.28249	19.3894	85.3177	221.28
Cc1nn(CCO[N+](=O)[O-])c(C)c1C	1.30859	6.17843	7.992	69.6298	252.81
Cc1nn(CCO[N+](=O)[O-])c(C)c1CCO[N+](=O)[O-]	1.41851	6.6649	13.1306	77.0703	213.743
Cc1nn(CCO[N+](=O)[O-])c(C)c1CO[N+](=O)[O-]	1.44848	6.89942	15.39	79.1093	204.945
Cc1nn(CCO[N+](=O)[O-])c(C)c1N(C)[N+](=O)[O-]	1.43806	6.84629	15.0471	92.1601	219.547
Cc1nn(CCO[N+](=O)[O-])c(C)c1N(CCO[N+](=O)[O-])[N+](=O)[O-]	1.49913	7.11157	18.2956	96.2549	198.554
Cc1nn(CCO[N+](=O)[O-])c(C)c1[N+](=O)[O-]	1.48372	7.00556	16.5342	96.6151	229.706
Cc1nn(CCO[N+](=O)[O-])c(CCO[N+](=O)[O-])c1C	1.40525	6.58386	13.6297	80.7479	201.715
Cc1nn(CCO[N+](=O)[O-])c(CCO[N+](=O)[O-])c1CCO[N+](=O)[O-]	1.50017	6.90883	16.3918	73.6786	184.783
Cc1nn(CCO[N+](=O)[O-])c(CCO[N+](=O)[O-])c1CO[N+](=O)[O-]	1.53474	7.14959	18.4962	76.1176	180.931
Cc1nn(CCO[N+](=O)[O-])c(CCO[N+](=O)[O-])c1N(C)[N+](=O)[O-]	1.50221	7.05063	18.1037	97.149	193.516
Cc1nn(CCO[N+](=O)[O-])c(CCO[N+](=O)[O-])c1N(CCO[N+](=O)[O-])[N+](=O)[O-]	1.57151	7.25749	20.8039	88.7356	185.095
Cc1nn(CCO[N+](=O)[O-])c(CCO[N+](=O)[O-])c1[N+](=O)[O-]	1.5529	7.2528	19.7382	93.4199	210.26
Cc1nn(CCO[N+](=O)[O-])c(CO[N+](=O)[O-])c1C	1.44687	6.82771	16.1094	80.3076	197.472
Cc1nn(CCO[N+](=O)[O-])c(CO[N+](=O)[O-])c1CCO[N+](=O)[O-]	1.53647	7.12594	18.7797	75.3166	179.827
Cc1nn(CCO[N+](=O)[O-])c(CO[N+](=O)[O-])c1CO[N+](=O)[O-]	1.57243	7.37495	20.9026	80.7806	178.852
Cc1nn(CCO[N+](=O)[O-])c(CO[N+](=O)[O-])c1N(C)[N+](=O)[O-]	1.5461	7.33002	20.5824	91.7743	187.314
Cc1nn(CCO[N+](=O)[O-])c(CO[N+](=O)[O-])c1N(CCO[N+](=O)[O-])[N+](=O)[O-]	1.60501	7.49145	22.9746	97.9285	190.96
Cc1nn(CCO[N+](=O)[O-])c(CO[N+](=O)[O-])c1[N+](=O)[O-]	1.60444	7.5264	22.6921	88.4866	195.708
Cc1nn(CCO[N+](=O)[O-])c(N(C)[N+](=O)[O-])c1C	1.42441	6.80115	15.2721	97.5465	212.237
Cc1nn(CCO[N+](=O)[O-])c(N(C)[N+](=O)[O-])c1CCO[N+](=O)[O-]	1.50703	7.10882	18.5416	89.0702	197.744
Cc1nn(CCO[N+](=O)[O-])c(N(C)[N+](=O)[O-])c1CO[N+](=O)[O-]	1.54973	7.37005	20.6985	87.8247	188.151
Cc1nn(CCO[N+](=O)[O-])c(N(C)[N+](=O)[O-])c1N(C)[N+](=O)[O-]	1.53334	7.32494	20.3578	111.619	198.819
Cc1nn(CCO[N+](=O)[O-])c(N(C)[N+](=O)[O-])c1N(CCO[N+](=O)[O-])[N+](=O)[O-]	1.58471	7.53236	23.1005	105.32	197.757
Cc1nn(CCO[N+](=O)[O-])c(N(C)[N+](=O)[O-])c1[N+](=O)[O-]	1.58406	7.51138	22.2417	102.264	195.473
Cc1nn(CCO[N+](=O)[O-])c(N(CCO[N+](=O)[O-])[N+](=O)[O-])c1C	1.50358	7.14845	18.9077	88.682	196.428
Cc1nn(CCO[N+](=O)[O-])c(N(CCO[N+](=O)[O-])[N+](=O)[O-])c1CCO[N+](=O)[O-]	1.57049	7.24361	20.9553	97.6781	193.668
Cc1nn(CCO[N+](=O)[O-])c(N(CCO[N+](=O)[O-])[N+](=O)[O-])c1CO[N+](=O)[O-]	1.60564	7.42682	23.092	99.5944	182.359
Cc1nn(CCO[N+](=O)[O-])c(N(CCO[N+](=O)[O-])[N+](=O)[O-])c1N(C)[N+](=O)[O-]	1.57956	7.41998	22.8479	122.976	206.148
Cc1nn(CCO[N+](=O)[O-])c(N(CCO[N+](=O)[O-])[N+](=O)[O-])c1N(CCO[N+](=O)[O-])[N+](=O)[O-]	1.63493	7.59156	24.7812	117.515	203.491
Cc1nn(CCO[N+](=O)[O-])c(N(CCO[N+](=O)[O-])[N+](=O)[O-])c1[N+](=O)[O-]	1.63304	7.65725	24.7939	103.865	201.835
Cc1nn(CCO[N+](=O)[O-])c([N+](=O)[O-])c1C	1.48327	7.01678	17.0334	90.2982	227.533
Cc1nn(CCO[N+](=O)[O-])c([N+](=O)[O-])c1CCO[N+](=O)[O-]	1.56465	7.31743	20.322	86.4192	202.679
Cc1nn(CCO[N+](=O)[O-])c([N+](=O)[O-])c1CO[N+](=O)[O-]	1.60778	7.59455	22.7735	93.4116	197.658
Cc1nn(CCO[N+](=O)[O-])c([N+](=O)[O-])c1N(C)[N+](=O)[O-]	1.57621	7.53919	22.2498	108.015	204.86
Cc1nn(CCO[N+](=O)[O-])c([N+](=O)[O-])c1N(CCO[N+](=O)[O-])[N+](=O)[O-]	1.63194	7.7481	24.7339	96.9041	190.666
Cc1nn(CCO[N+](=O)[O-])c([N+](=O)[O-])c1[N+](=O)[O-]	1.65143	7.77515	24.9021	101.815	211.477
Cc1nn(CCO[N+](=O)[O-])cc1CCO[N+](=O)[O-]	1.45941	6.8286	15.0386	65.5053	199.373
Cc1nn(CCO[N+](=O)[O-])cc1CO[N+](=O)[O-]	1.49784	7.13005	17.384	76.1186	195.248
Cc1nn(CCO[N+](=O)[O-])cc1N(C)[N+](=O)[O-]	1.48893	7.06951	17.2431	83.2033	202.801
Cc1nn(CCO[N+](=O)[O-])cc1N(CCO[N+](=O)[O-])[N+](=O)[O-]	1.55004	7.29637	20.7013	88.7453	194.042
Cc1nn(CCO[N+](=O)[O-])cc1[N+](=O)[O-]	1.54286	7.2763	19.208	90.0491	220.734
O=[N+]([O-])OCCN(c1c(CO[N+](=O)[O-])c(CO[N+](=O)[O-])nn1CCO[N+](=O)[O-])[N+](=O)[O-]	1.70435	7.75396	26.4943	101.929	175.678
O=[N+]([O-])OCCN(c1c(CO[N+](=O)[O-])c([N+](=O)[O-])nn1CCO[N+](=O)[O-])[N+](=O)[O-]	1.72375	7.95319	28.4084	108.601	194.093
O=[N+]([O-])OCCN(c1c(CO[N+](=O)[O-])cnn1CCO[N+](=O)[O-])[N+](=O)[O-]	1.66437	7.77612	25.1539	77.5301	169.425
O=[N+]([O-])OCCN(c1c(CO[N+](=O)[O-])nn(CCO[N+](=O)[O-])c1CO[N+](=O)[O-])[N+](=O)[O-]	1.70464	7.83214	26.5303	85.6801	164.824
O=[N+]([O-])OCCN(c1c(CO[N+](=O)[O-])nn(CCO[N+](=O)[O-])c1N(CCO[N+](=O)[O-])[N+](=O)[O-])[N+](=O)[O-]	1.7255	7.94549	28.3505	103.734	182.326
O=[N+]([O-])OCCN(c1c(CO[N+](=O)[O-])nn(CCO[N+](=O)[O-])c1[N+](=O)[O-])[N+](=O)[O-]	1.7252	8.00999	28.336	107.042	195.639
O=[N+]([O-])OCCN(c1c([N+](=O)[O-])c(CO[N+](=O)[O-])nn1CCO[N+](=O)[O-])[N+](=O)[O-]	1.73388	8.09294	28.7024	90.4303	172.432
O=[N+]([O-])OCCN(c1c([N+](=O)[O-])c([N+](=O)[O-])nn1CCO[N+](=O)[O-])[N+](=O)[O-]	1.75382	8.17369	30.2768	111.293	200.658
O=[N+]([O-])OCCN(c1c([N+](=O)[O-])cnn1CCO[N+](=O)[O-])[N+](=O)[O-]	1.69745	8.01121	27.1648	92.8769	182.903
O=[N+]([O-])OCCN(c1c([N+](=O)[O-])nn(CCO[N+](=O)[O-])c1CO[N+](=O)[O-])[N+](=O)[O-]	1.72481	8.02412	28.5381	89.9729	176.582
O=[N+]([O-])OCCN(c1c([N+](=O)[O-])nn(CCO[N+](=O)[O-])c1N(CCO[N+](=O)[O-])[N+](=O)[O-])[N+](=O)[O-]	1.74193	8.09209	30.0292	114.085	191.4
O=[N+]([O-])OCCN(c1c([N+](=O)[O-])nn(CCO[N+](=O)[O-])c1[N+](=O)[O-])[N+](=O)[O-]	1.75686	8.34004	30.7295	103.077	183.086
O=[N+]([O-])OCCN(c1cc(CO[N+](=O)[O-])n(CCO[N+](=O)[O-])n1)[N+](=O)[O-]	1.66529	7.69248	24.9344	83.7005	173.736
O=[N+]([O-])OCCN(c1cc(CO[N+](=O)[O-])nn1CCO[N+](=O)[O-])[N+](=O)[O-]	1.66212	7.70232	24.9333	91.6804	182.81
O=[N+]([O-])OCCN(c1cc(N(CCO[N+](=O)[O-])[N+](=O)[O-])n(CCO[N+](=O)[O-])n1)[N+](=O)[O-]	1.69726	7.84696	26.8571	96.8634	181.449
O=[N+]([O-])OCCN(c1cc([N+](=O)[O-])n(CCO[N+](=O)[O-])n1)[N+](=O)[O-]	1.69974	8.00735	27.0778	94.0239	183.645
O=[N+]([O-])OCCN(c1cc([N+](=O)[O-])nn1CCO[N+](=O)[O-])[N+](=O)[O-]	1.6855	7.87739	26.7936	108.303	206.845
O=[N+]([O-])OCCN(c1ccn(CCO[N+](=O)[O-])n1)[N+](=O)[O-]	1.60992	7.60991	22.8895	79.4736	173.191
O=[N+]([O-])OCCN(c1ccnn1CCO[N+](=O)[O-])[N+](=O)[O-]	1.61097	7.59625	23.1689	78.3546	177.118
O=[N+]([O-])OCCN(c1cn(CCO[N+](=O)[O-])nc1CO[N+](=O)[O-])[N+](=O)[O-]	1.65705	7.73326	24.988	88.1636	179.07
O=[N+]([O-])OCCN(c1cn(CCO[N+](=O)[O-])nc1N(CCO[N+](=O)[O-])[N+](=O)[O-])[N+](=O)[O-]	1.68939	7.738	26.4997	119.671	198.686
O=[N+]([O-])OCCN(c1cn(CCO[N+](=O)[O-])nc1[N+](=O)[O-])[N+](=O)[O-]	1.68826	7.96281	26.7208	91.4706	183.843
O=[N+]([O-])OCCN(c1cnn(CCO[N+](=O)[O-])c1)[N+](=O)[O-]	1.61867	7.57509	22.8913	73.7552	176.344
O=[N+]([O-])OCCN(c1cnn(CCO[N+](=O)[O-])c1CO[N+](=O)[O-])[N+](=O)[O-]	1.66546	7.74116	24.9584	80.0057	171.365
O=[N+]([O-])OCCN(c1cnn(CCO[N+](=O)[O-])c1N(CCO[N+](=O)[O-])[N+](=O)[O-])[N+](=O)[O-]	1.69534	7.84872	26.9695	97.0439	183.672
O=[N+]([O-])OCCN(c1cnn(CCO[N+](=O)[O-])c1[N+](=O)[O-])[N+](=O)[O-]	1.69061	7.99446	27.0858	93.1977	186.473
O=[N+]([O-])OCCN(c1nn(CCO[N+](=O)[O-])c(CO[N+](=O)[O-])c1CO[N+](=O)[O-])[N+](=O)[O-]	1.70414	7.75739	26.4294	97.465	170.891
O=[N+]([O-])OCCN(c1nn(CCO[N+](=O)[O-])c(CO[N+](=O)[O-])c1N(CCO[N+](=O)[O-])[N+](=O)[O-])[N+](=O)[O-]	1.72504	7.78932	27.9882	120.881	189.691
O=[N+]([O-])OCCN(c1nn(CCO[N+](=O)[O-])c(CO[N+](=O)[O-])c1[N+](=O)[O-])[N+](=O)[O-]	1.73078	8.04146	28.3244	98.4946	182.375
O=[N+]([O-])OCCN(c1nn(CCO[N+](=O)[O-])c(N(CCO[N+](=O)[O-])[N+](=O)[O-])c1CO[N+](=O)[O-])[N+](=O)[O-]	1.72502	7.87872	28.4764	121.498	200.21
O=[N+]([O-])OCCN(c1nn(CCO[N+](=O)[O-])c(N(CCO[N+](=O)[O-])[N+](=O)[O-])c1N(CCO[N+](=O)[O-])[N+](=O)[O-])[N+](=O)[O-]	1.74896	7.92167	29.9149	147.565	215.74
O=[N+]([O-])OCCN(c1nn(CCO[N+](=O)[O-])c(N(CCO[N+](=O)[O-])[N+](=O)[O-])c1[N+](=O)[O-])[N+](=O)[O-]	1.75452	8.09055	30.0607	109.762	180.913
O=[N+]([O-])OCCN(c1nn(CCO[N+](=O)[O-])c([N+](=O)[O-])c1CO[N+](=O)[O-])[N+](=O)[O-]	1.72818	7.9924	28.3732	106.904	192.465
O=[N+]([O-])OCCN(c1nn(CCO[N+](=O)[O-])c([N+](=O)[O-])c1N(CCO[N+](=O)[O-])[N+](=O)[O-])[N+](=O)[O-]	1.73925	8.14733	30.2258	131.142	210.393
O=[N+]([O-])OCCN(c1nn(CCO[N+](=O)[O-])c([N+](=O)[O-])c1[N+](=O)[O-])[N+](=O)[O-]	1.76204	8.24655	30.5722	105.14	191.014
O=[N+]([O-])OCCN(c1nn(CCO[N+](=O)[O-])cc1CO[N+](=O)[O-])[N+](=O)[O-]	1.65885	7.63737	24.7335	97.9561	184.398
O=[N+]([O-])OCCN(c1nn(CCO[N+](=O)[O-])cc1[N+](=O)[O-])[N+](=O)[O-]	1.69381	7.88817	26.8335	100.045	192.068
O=[N+]([O-])OCCc1c(CO[N+](=O)[O-])c(CO[N+](=O)[O-])nn1CCO[N+](=O)[O-]	1.64026	7.54485	22.4631	79.872	164.091
O=[N+]([O-])OCCc1c(CO[N+](=O)[O-])c(N(CCO[N+](=O)[O-])[N+](=O)[O-])nn1CCO[N+](=O)[O-]	1.66952	7.53688	24.2985	104.121	181.317
O=[N+]([O-])OCCc1c(CO[N+](=O)[O-])c([N+](=O)[O-])nn1CCO[N+](=O)[O-]	1.66147	7.64775	24.3254	90.0591	191.712
O=[N+]([O-])OCCc1c(CO[N+](=O)[O-])cnn1CCO[N+](=O)[O-]	1.58566	7.34621	20.3615	71.5152	176.828
O=[N+]([O-])OCCc1c(CO[N+](=O)[O-])nn(CCO[N+](=O)[O-])c1CCO[N+](=O)[O-]	1.60873	7.26526	20.4957	83.2517	171.315
O=[N+]([O-])OCCc1c(CO[N+](=O)[O-])nn(CCO[N+](=O)[O-])c1CO[N+](=O)[O-]	1.64375	7.51779	22.6876	78.7245	164.227
O=[N+]([O-])OCCc1c(CO[N+](=O)[O-])nn(CCO[N+](=O)[O-])c1N(CCO[N+](=O)[O-])[N+](=O)[O-]	1.67204	7.59959	24.731	86.5887	170.206
O=[N+]([O-])OCCc1c(CO[N+](=O)[O-])nn(CCO[N+](=O)[O-])c1[N+](=O)[O-]	1.66953	7.74235	24.6998	83.0879	180.719
O=[N+]([O-])OCCc1c(N(CCO[N+](=O)[O-])[N+](=O)[O-])c(CO[N+](=O)[O-])nn1CCO[N+](=O)[O-]	1.66939	7.54472	24.5487	95.9734	179.032
O=[N+]([O-])OCCc1c(N(CCO[N+](=O)[O-])[N+](=O)[O-])c(N(CCO[N+](=O)[O-])[N+](=O)[O-])nn1CCO[N+](=O)[O-]	1.69402	7.69476	26.4113	104.156	185.409
O=[N+]([O-])OCCc1c(N(CCO[N+](=O)[O-])[N+](=O)[O-])c([N+](=O)[O-])nn1CCO[N+](=O)[O-]	1.67575	7.74178	26.2248	112.848	211.281
O=[N+]([O-])OCCc1c(N(CCO[N+](=O)[O-])[N+](=O)[O-])cnn1CCO[N+](=O)[O-]	1.62671	7.47257	22.695	78.1362	175.598
O=[N+]([O-])OCCc1c(N(CCO[N+](=O)[O-])[N+](=O)[O-])nn(CCO[N+](=O)[O-])c1CCO[N+](=O)[O-]	1.63797	7.37867	22.7287	98.0491	187.331
O=[N+]([O-])OCCc1c(N(CCO[N+](=O)[O-])[N+](=O)[O-])nn(CCO[N+](=O)[O-])c1CO[N+](=O)[O-]	1.67128	7.56723	24.5277	91.6998	170.639
O=[N+]([O-])OCCc1c(N(CCO[N+](=O)[O-])[N+](=O)[O-])nn(CCO[N+](=O)[O-])c1N(CCO[N+](=O)[O-])[N+](=O)[O-]	1.69556	7.6746	26.349	126.194	206.768
O=[N+]([O-])OCCc1c(N(CCO[N+](=O)[O-])[N+](=O)[O-])nn(CCO[N+](=O)[O-])c1[N+](=O)[O-]	1.69286	7.80595	26.6156	90.6623	183.161
O=[N+]([O-])OCCc1c([N+](=O)[O-])c(CO[N+](=O)[O-])nn1CCO[N+](=O)[O-]	1.66871	7.70913	24.5085	86.4661	184.832
O=[N+]([O-])OCCc1c([N+](=O)[O-])c(N(CCO[N+](=O)[O-])[N+](=O)[O-])nn1CCO[N+](=O)[O-]	1.69193	7.81611	26.2544	95.0992	184.658
O=[N+]([O-])OCCc1c([N+](=O)[O-])c([N+](=O)[O-])nn1CCO[N+](=O)[O-]	1.68989	7.82808	26.355	95.4454	203.173
O=[N+]([O-])OCCc1c([N+](=O)[O-])cnn1CCO[N+](=O)[O-]	1.61447	7.4976	22.2475	81.7472	202.49
O=[N+]([O-])OCCc1c([N+](=O)[O-])nn(CCO[N+](=O)[O-])c1CCO[N+](=O)[O-]	1.61879	7.42351	22.1224	87.1968	199.948
O=[N+]([O-])OCCc1c([N+](=O)[O-])nn(CCO[N+](=O)[O-])c1CO[N+](=O)[O-]	1.65287	7.68622	24.4357	94.2833	195.999
O=[N+]([O-])OCCc1c([N+](=O)[O-])nn(CCO[N+](=O)[O-])c1N(CCO[N+](=O)[O-])[N+](=O)[O-]	1.68449	7.78364	26.398	97.6631	194.305
O=[N+]([O-])OCCc1c([N+](=O)[O-])nn(CCO[N+](=O)[O-])c1[N+](=O)[O-]	1.70019	7.95582	26.7078	91.3797	196.64
O=[N+]([O-])OCCc1cc(CCO[N+](=O)[O-])n(CCO[N+](=O)[O-])n1	1.54625	7.05693	18.0337	68.849	180.105
O=[N+]([O-])OCCc1cc(CO[N+](=O)[O-])n(CCO[N+](=O)[O-])n1	1.58496	7.30561	20.4836	72.8945	179.738
O=[N+]([O-])OCCc1cc(CO[N+](=O)[O-])nn1CCO[N+](=O)[O-]	1.58131	7.29751	20.2988	82.3142	186.325
O=[N+]([O-])OCCc1cc(N(CCO[N+](=O)[O-])[N+](=O)[O-])n(CCO[N+](=O)[O-])n1	1.62631	7.42503	22.8716	84.4259	178.645
O=[N+]([O-])OCCc1cc(N(CCO[N+](=O)[O-])[N+](=O)[O-])nn1CCO[N+](=O)[O-]	1.6208	7.48321	22.5957	85.5877	181.867
O=[N+]([O-])OCCc1cc([N+](=O)[O-])n(CCO[N+](=O)[O-])n1	1.61786	7.55486	22.3696	81.9049	198.343
O=[N+]([O-])OCCc1cc([N+](=O)[O-])nn1CCO[N+](=O)[O-]	1.60974	7.48312	22.2552	84.7843	203.356
O=[N+]([O-])OCCc1ccn(CCO[N+](=O)[O-])n1	1.516	7.06665	17.1549	61.4119	186.754
O=[N+]([O-])OCCc1ccnn1CCO[N+](=O)[O-]	1.51228	7.04925	17.3457	57.3657	190.389
O=[N+]([O-])OCCc1cn(CCO[N+](=O)[O-])nc1CCO[N+](=O)[O-]	1.54161	6.98683	18.0916	80.0652	186.721
O=[N+]([O-])OCCc1cn(CCO[N+](=O)[O-])nc1CO[N+](=O)[O-]	1.5874	7.30611	20.4506	70.2856	176.283
O=[N+]([O-])OCCc1cn(CCO[N+](=O)[O-])nc1N(CCO[N+](=O)[O-])[N+](=O)[O-]	1.62033	7.40206	22.5073	94.5235	188.921
O=[N+]([O-])OCCc1cn(CCO[N+](=O)[O-])nc1[N+](=O)[O-]	1.60456	7.55019	21.8916	84.9165	196.583
O=[N+]([O-])OCCc1cnn(CCO[N+](=O)[O-])c1	1.5166	7.07918	17.0104	67.0482	187.413
O=[N+]([O-])OCCc1cnn(CCO[N+](=O)[O-])c1CCO[N+](=O)[O-]	1.54484	7.08394	17.946	70.4628	181.718
O=[N+]([O-])OCCc1cnn(CCO[N+](=O)[O-])c1CO[N+](=O)[O-]	1.58357	7.35346	20.3005	73.4614	178.296
O=[N+]([O-])OCCc1cnn(CCO[N+](=O)[O-])c1N(CCO[N+](=O)[O-])[N+](=O)[O-]	1.62301	7.41625	22.767	91.5427	186.42
O=[N+]([O-])OCCc1cnn(CCO[N+](=O)[O-])c1[N+](=O)[O-]	1.60773	7.56216	22.2999	84.8	199.668
O=[N+]([O-])OCCc1nn(CCO[N+](=O)[O-])c(CCO[N+](=O)[O-])c1CCO[N+](=O)[O-]	1.57632	7.09375	18.3863	82.5873	175.685
O=[N+]([O-])OCCc1nn(CCO[N+](=O)[O-])c(CCO[N+](=O)[O-])c1CO[N+](=O)[O-]	1.60828	7.2748	20.3648	82.7968	171.265
O=[N+]([O-])OCCc1nn(CCO[N+](=O)[O-])c(CCO[N+](=O)[O-])c1N(CCO[N+](=O)[O-])[N+](=O)[O-]	1.63845	7.34492	22.5374	100.527	187.404
O=[N+]([O-])OCCc1nn(CCO[N+](=O)[O-])c(CCO[N+](=O)[O-])c1[N+](=O)[O-]	1.62746	7.38062	22.1984	93.034	194.359
O=[N+]([O-])OCCc1nn(CCO[N+](=O)[O-])c(CO[N+](=O)[O-])c1CCO[N+](=O)[O-]	1.60901	7.29106	20.5177	78.3181	168.371
O=[N+]([O-])OCCc1nn(CCO[N+](=O)[O-])c(CO[N+](=O)[O-])c1CO[N+](=O)[O-]	1.64144	7.49318	22.6375	86.0076	174.859
O=[N+]([O-])OCCc1nn(CCO[N+](=O)[O-])c(CO[N+](=O)[O-])c1N(CCO[N+](=O)[O-])[N+](=O)[O-]	1.66898	7.50661	24.3386	103.835	182.639
O=[N+]([O-])OCCc1nn(CCO[N+](=O)[O-])c(CO[N+](=O)[O-])c1[N+](=O)[O-]	1.67051	7.69792	24.5348	85.7317	183.139
O=[N+]([O-])OCCc1nn(CCO[N+](=O)[O-])c(N(CCO[N+](=O)[O-])[N+](=O)[O-])c1CCO[N+](=O)[O-]	1.63982	7.33786	22.6247	103.028	188.691
O=[N+]([O-])OCCc1nn(CCO[N+](=O)[O-])c(N(CCO[N+](=O)[O-])[N+](=O)[O-])c1CO[N+](=O)[O-]	1.66981	7.58662	24.5894	110.627	197.516
O=[N+]([O-])OCCc1nn(CCO[N+](=O)[O-])c(N(CCO[N+](=O)[O-])[N+](=O)[O-])c1N(CCO[N+](=O)[O-])[N+](=O)[O-]	1.69302	7.7027	26.7279	126.54	209.801
O=[N+]([O-])OCCc1nn(CCO[N+](=O)[O-])c(N(CCO[N+](=O)[O-])[N+](=O)[O-])c1[N+](=O)[O-]	1.69397	7.79528	26.3974	94.7883	185.792
O=[N+]([O-])OCCc1nn(CCO[N+](=O)[O-])c([N+](=O)[O-])c1CCO[N+](=O)[O-]	1.62603	7.46436	22.2621	85.2463	193.956
O=[N+]([O-])OCCc1nn(CCO[N+](=O)[O-])c([N+](=O)[O-])c1CO[N+](=O)[O-]	1.66956	7.69659	24.6846	84.9047	183.899
O=[N+]([O-])OCCc1nn(CCO[N+](=O)[O-])c([N+](=O)[O-])c1N(CCO[N+](=O)[O-])[N+](=O)[O-]	1.68697	7.86126	26.3989	90.3981	182.417
O=[N+]([O-])OCCc1nn(CCO[N+](=O)[O-])c([N+](=O)[O-])c1[N+](=O)[O-]	1.69834	7.93033	26.5774	89.7977	198.182
O=[N+]([O-])OCCc1nn(CCO[N+](=O)[O-])cc1CO[N+](=O)[O-]	1.58429	7.34984	20.2439	72.5556	176.334
O=[N+]([O-])OCCc1nn(CCO[N+](=O)[O-])cc1N(CCO[N+](=O)[O-])[N+](=O)[O-]	1.6194	7.52202	22.6495	81.5699	176.708
O=[N+]([O-])OCCc1nn(CCO[N+](=O)[O-])cc1[N+](=O)[O-]	1.61792	7.54698	22.1415	83.7904	195.846
O=[N+]([O-])OCCn1cc(CO[N+](=O)[O-])c(CO[N+](=O)[O-])n1	1.63214	7.61847	22.9038	72.7011	168.027
O=[N+]([O-])OCCn1cc(CO[N+](=O)[O-])c([N+](=O)[O-])n1	1.66755	7.83779	25.0043	89.1986	189.987
O=[N+]([O-])OCCn1cc(CO[N+](=O)[O-])cn1	1.56681	7.39202	19.9791	74.6316	182.76
O=[N+]([O-])OCCn1cc([N+](=O)[O-])c(CO[N+](=O)[O-])n1	1.671	7.80908	25.2864	82.3408	192.415
O=[N+]([O-])OCCn1cc([N+](=O)[O-])c([N+](=O)[O-])n1	1.71577	8.09773	27.5159	95.1592	206.668
O=[N+]([O-])OCCn1cc([N+](=O)[O-])cn1	1.61091	7.61008	22.2125	92.4069	211.661
O=[N+]([O-])OCCn1ccc(CO[N+](=O)[O-])n1	1.56688	7.38404	20.0895	71.8467	181.279
O=[N+]([O-])OCCn1ccc([N+](=O)[O-])n1	1.60194	7.58546	22.1973	81.2095	211.929
O=[N+]([O-])OCCn1nc(CO[N+](=O)[O-])c(CO[N+](=O)[O-])c1CO[N+](=O)[O-]	1.68164	7.74112	24.8899	80.8739	160.748
O=[N+]([O-])OCCn1nc(CO[N+](=O)[O-])c(CO[N+](=O)[O-])c1[N+](=O)[O-]	1.71283	7.98185	27.1652	86.6322	178.125
O=[N+]([O-])OCCn1nc(CO[N+](=O)[O-])c([N+](=O)[O-])c1CO[N+](=O)[O-]	1.71438	7.97448	27.0561	86.6647	176.105
O=[N+]([O-])OCCn1nc(CO[N+](=O)[O-])c([N+](=O)[O-])c1[N+](=O)[O-]	1.75232	8.18353	29.5966	91.5767	191.37
O=[N+]([O-])OCCn1nc(CO[N+](=O)[O-])cc1CO[N+](=O)[O-]	1.62972	7.56552	23.1971	76.107	176.398
O=[N+]([O-])OCCn1nc(CO[N+](=O)[O-])cc1[N+](=O)[O-]	1.67014	7.86542	25.3035	88.6237	192.408
O=[N+]([O-])OCCn1nc([N+](=O)[O-])c(CO[N+](=O)[O-])c1CO[N+](=O)[O-]	1.70632	7.9481	26.8861	86.2809	181.214
O=[N+]([O-])OCCn1nc([N+](=O)[O-])c(CO[N+](=O)[O-])c1[N+](=O)[O-]	1.75606	8.22984	29.6863	94.6784	188.075
O=[N+]([O-])OCCn1nc([N+](=O)[O-])c([N+](=O)[O-])c1CO[N+](=O)[O-]	1.74651	8.1753	29.3269	90.6953	190.909
O=[N+]([O-])OCCn1nc([N+](=O)[O-])c([N+](=O)[O-])c1[N+](=O)[O-]	1.79102	8.47847	31.7459	100.81	202.646
O=[N+]([O-])OCCn1nc([N+](=O)[O-])cc1CO[N+](=O)[O-]	1.66824	7.82108	25.3572	82.4801	193.85
O=[N+]([O-])OCCn1nc([N+](=O)[O-])cc1[N+](=O)[O-]	1.71823	8.10623	27.8596	96.8152	212.151
O=[N+]([O-])OCCn1ncc(CO[N+](=O)[O-])c1CO[N+](=O)[O-]	1.63229	7.61216	23.0884	71.2583	170.546
O=[N+]([O-])OCCn1ncc(CO[N+](=O)[O-])c1[N+](=O)[O-]	1.66819	7.87205	25.2053	92.1882	190.864
O=[N+]([O-])OCCn1ncc([N+](=O)[O-])c1CO[N+](=O)[O-]	1.6625	7.8158	25.0883	86.1638	199.948
O=[N+]([O-])OCCn1ncc([N+](=O)[O-])c1[N+](=O)[O-]	1.71456	8.12282	27.692	104.783	208.299
O=[N+]([O-])OCCn1nccc1CO[N+](=O)[O-]	1.56283	7.39247	20.2059	66.441	182.335
O=[N+]([O-])OCCn1nccc1[N+](=O)[O-]	1.60884	7.60077	22.5882	80.5835	214.065

## Sheet: imi
SMILES	Density	Dv	P	Tm	Td
CN(c1c(CCO[N+](=O)[O-])nc(CCO[N+](=O)[O-])n1C)[N+](=O)[O-]	1.50174	7.03507	17.963	96.6261	193.413
CN(c1c(CCO[N+](=O)[O-])nc(CO[N+](=O)[O-])n1C)[N+](=O)[O-]	1.54388	7.27549	20.4262	96.0523	185.086
CN(c1c(CCO[N+](=O)[O-])nc(N(CCO[N+](=O)[O-])[N+](=O)[O-])n1C)[N+](=O)[O-]	1.58204	7.41461	22.6453	119.388	194.679
CN(c1c(CCO[N+](=O)[O-])nc([N+](=O)[O-])n1C)[N+](=O)[O-]	1.58139	7.46664	22.1702	107.472	196.259
CN(c1c(CCO[N+](=O)[O-])ncn1C)[N+](=O)[O-]	1.47711	7.01232	17.2014	82.2703	199.677
CN(c1c(CO[N+](=O)[O-])nc(CCO[N+](=O)[O-])n1C)[N+](=O)[O-]	1.54875	7.321	20.4675	88.4014	186.496
CN(c1c(CO[N+](=O)[O-])nc(CO[N+](=O)[O-])n1C)[N+](=O)[O-]	1.59042	7.57099	22.9938	93.9137	179.541
CN(c1c(CO[N+](=O)[O-])nc(N(CCO[N+](=O)[O-])[N+](=O)[O-])n1C)[N+](=O)[O-]	1.62704	7.6971	25.0141	109.691	185.013
CN(c1c(CO[N+](=O)[O-])nc([N+](=O)[O-])n1C)[N+](=O)[O-]	1.62859	7.75375	24.9256	114.85	189.204
CN(c1c(CO[N+](=O)[O-])ncn1C)[N+](=O)[O-]	1.51773	7.26164	20.1009	92.7759	199.716
CN(c1c(N(CCO[N+](=O)[O-])[N+](=O)[O-])nc(CCO[N+](=O)[O-])n1C)[N+](=O)[O-]	1.5786	7.38443	22.4099	121.426	194.379
CN(c1c(N(CCO[N+](=O)[O-])[N+](=O)[O-])nc(CO[N+](=O)[O-])n1C)[N+](=O)[O-]	1.61913	7.74476	25.048	112.692	196.365
CN(c1c(N(CCO[N+](=O)[O-])[N+](=O)[O-])nc(N(CCO[N+](=O)[O-])[N+](=O)[O-])n1C)[N+](=O)[O-]	1.64495	7.79942	27.0188	153.34	230.53
CN(c1c(N(CCO[N+](=O)[O-])[N+](=O)[O-])nc([N+](=O)[O-])n1C)[N+](=O)[O-]	1.6606	7.88948	26.6946	127.873	188.617
CN(c1c(N(CCO[N+](=O)[O-])[N+](=O)[O-])ncn1C)[N+](=O)[O-]	1.58563	7.56213	23.0968	103.251	191.781
CN(c1c([N+](=O)[O-])nc(CCO[N+](=O)[O-])n1C)[N+](=O)[O-]	1.57467	7.48356	21.8685	106.568	202.641
CN(c1c([N+](=O)[O-])nc(CO[N+](=O)[O-])n1C)[N+](=O)[O-]	1.62709	7.76413	24.7633	109.722	192.364
CN(c1c([N+](=O)[O-])nc(N(CCO[N+](=O)[O-])[N+](=O)[O-])n1C)[N+](=O)[O-]	1.66127	7.92638	26.6823	125.637	192.142
CN(c1c([N+](=O)[O-])nc([N+](=O)[O-])n1C)[N+](=O)[O-]	1.68224	8.00616	26.9884	129.103	199.413
CN(c1c([N+](=O)[O-])ncn1C)[N+](=O)[O-]	1.56281	7.45969	21.7094	107.414	207.883
CN(c1cn(C)c(CCO[N+](=O)[O-])n1)[N+](=O)[O-]	1.48035	6.99341	17.2047	80.9644	199.226
CN(c1cn(C)c(CO[N+](=O)[O-])n1)[N+](=O)[O-]	1.53878	7.31996	20.1979	84.7177	195.526
CN(c1cn(C)c(N(C)[N+](=O)[O-])n1)[N+](=O)[O-]	1.52635	7.2648	19.7104	109.541	200.609
CN(c1cn(C)c(N(CCO[N+](=O)[O-])[N+](=O)[O-])n1)[N+](=O)[O-]	1.58276	7.48958	23.0363	108.512	187.438
CN(c1cn(C)c([N+](=O)[O-])n1)[N+](=O)[O-]	1.58525	7.50456	22.0444	107.578	210.315
CN(c1cn(C)cn1)[N+](=O)[O-]	1.43105	6.76688	14.5056	70.4149	221.942
CN(c1cnc(CCO[N+](=O)[O-])n1C)[N+](=O)[O-]	1.48696	7.05604	17.054	84.2505	203.771
CN(c1cnc(CO[N+](=O)[O-])n1C)[N+](=O)[O-]	1.54128	7.35249	20.1323	88.6815	197.804
CN(c1cnc(N(C)[N+](=O)[O-])n1C)[N+](=O)[O-]	1.52435	7.29529	19.6286	111.664	200.839
CN(c1cnc(N(CCO[N+](=O)[O-])[N+](=O)[O-])n1C)[N+](=O)[O-]	1.58736	7.60265	22.9531	106.92	193.778
CN(c1cnc([N+](=O)[O-])n1C)[N+](=O)[O-]	1.58386	7.54029	21.7779	112.699	214.444
CN(c1cncn1C)[N+](=O)[O-]	1.41683	6.76432	14.3144	74.1531	221.681
CN(c1nc(CCO[N+](=O)[O-])c(CCO[N+](=O)[O-])n1C)[N+](=O)[O-]	1.4993	6.98335	18.0224	102.521	190.154
CN(c1nc(CCO[N+](=O)[O-])c(CO[N+](=O)[O-])n1C)[N+](=O)[O-]	1.54184	7.24408	20.5586	100.95	183.072
CN(c1nc(CCO[N+](=O)[O-])c(N(C)[N+](=O)[O-])n1C)[N+](=O)[O-]	1.52921	7.24787	20.1673	118.486	193.197
CN(c1nc(CCO[N+](=O)[O-])c(N(CCO[N+](=O)[O-])[N+](=O)[O-])n1C)[N+](=O)[O-]	1.58062	7.43358	22.7301	118.954	204.564
CN(c1nc(CCO[N+](=O)[O-])c([N+](=O)[O-])n1C)[N+](=O)[O-]	1.58377	7.51315	22.1558	105.637	200.752
CN(c1nc(CCO[N+](=O)[O-])cn1C)[N+](=O)[O-]	1.48812	7.04762	17.138	82.465	202.264
CN(c1nc(CCO[N+](=O)[O-])n(C)c1CCO[N+](=O)[O-])[N+](=O)[O-]	1.50626	7.02255	18.1261	90.1642	187.702
CN(c1nc(CCO[N+](=O)[O-])n(C)c1CO[N+](=O)[O-])[N+](=O)[O-]	1.54045	7.29051	20.242	97.9377	190.049
CN(c1nc(CCO[N+](=O)[O-])n(C)c1N(C)[N+](=O)[O-])[N+](=O)[O-]	1.53359	7.28168	20.2073	111.424	195.972
CN(c1nc(CCO[N+](=O)[O-])n(C)c1N(CCO[N+](=O)[O-])[N+](=O)[O-])[N+](=O)[O-]	1.58246	7.46409	22.7994	109.065	199.87
CN(c1nc(CCO[N+](=O)[O-])n(C)c1[N+](=O)[O-])[N+](=O)[O-]	1.58253	7.51555	22.0485	105.012	200.002
CN(c1nc(CO[N+](=O)[O-])c(CCO[N+](=O)[O-])n1C)[N+](=O)[O-]	1.5405	7.23519	20.5029	101.782	184.183
CN(c1nc(CO[N+](=O)[O-])c(CO[N+](=O)[O-])n1C)[N+](=O)[O-]	1.58418	7.54642	22.8423	103.079	185.542
CN(c1nc(CO[N+](=O)[O-])c(N(C)[N+](=O)[O-])n1C)[N+](=O)[O-]	1.57772	7.55802	22.7944	115.517	191.718
CN(c1nc(CO[N+](=O)[O-])c(N(CCO[N+](=O)[O-])[N+](=O)[O-])n1C)[N+](=O)[O-]	1.61419	7.6671	25.408	132.455	217.396
CN(c1nc(CO[N+](=O)[O-])c([N+](=O)[O-])n1C)[N+](=O)[O-]	1.63719	7.80009	25.0762	109.041	192.012
CN(c1nc(CO[N+](=O)[O-])cn1C)[N+](=O)[O-]	1.53717	7.34953	20.056	88.7243	196.506
CN(c1nc(CO[N+](=O)[O-])n(C)c1CCO[N+](=O)[O-])[N+](=O)[O-]	1.54604	7.32084	20.3504	89.705	188.211
CN(c1nc(CO[N+](=O)[O-])n(C)c1CO[N+](=O)[O-])[N+](=O)[O-]	1.59055	7.55374	23.0269	93.1706	179.687
CN(c1nc(CO[N+](=O)[O-])n(C)c1N(C)[N+](=O)[O-])[N+](=O)[O-]	1.57621	7.53713	22.7347	115.841	191.019
CN(c1nc(CO[N+](=O)[O-])n(C)c1N(CCO[N+](=O)[O-])[N+](=O)[O-])[N+](=O)[O-]	1.62475	7.67424	24.9257	110.556	187.427
CN(c1nc(CO[N+](=O)[O-])n(C)c1[N+](=O)[O-])[N+](=O)[O-]	1.63401	7.77219	24.9608	107.864	187.949
CN(c1nc(N(C)[N+](=O)[O-])n(C)c1CCO[N+](=O)[O-])[N+](=O)[O-]	1.51397	7.18395	19.7184	140.177	201.966
CN(c1nc(N(C)[N+](=O)[O-])n(C)c1CO[N+](=O)[O-])[N+](=O)[O-]	1.57483	7.51768	22.7238	118.094	186.86
CN(c1nc(N(C)[N+](=O)[O-])n(C)c1N(C)[N+](=O)[O-])[N+](=O)[O-]	1.5675	7.48342	22.3529	156.845	202.903
CN(c1nc(N(C)[N+](=O)[O-])n(C)c1N(CCO[N+](=O)[O-])[N+](=O)[O-])[N+](=O)[O-]	1.60315	7.6288	24.5655	158.787	216.407
CN(c1nc(N(C)[N+](=O)[O-])n(C)c1[N+](=O)[O-])[N+](=O)[O-]	1.61866	7.72976	24.3258	139.562	191.915
CN(c1nc(N(CCO[N+](=O)[O-])[N+](=O)[O-])c(CCO[N+](=O)[O-])n1C)[N+](=O)[O-]	1.57933	7.42431	22.5117	119.02	199.058
CN(c1nc(N(CCO[N+](=O)[O-])[N+](=O)[O-])c(CO[N+](=O)[O-])n1C)[N+](=O)[O-]	1.62036	7.62276	24.836	120.369	185.289
CN(c1nc(N(CCO[N+](=O)[O-])[N+](=O)[O-])c(N(C)[N+](=O)[O-])n1C)[N+](=O)[O-]	1.60985	7.64281	24.7424	148.86	204.539
CN(c1nc(N(CCO[N+](=O)[O-])[N+](=O)[O-])c(N(CCO[N+](=O)[O-])[N+](=O)[O-])n1C)[N+](=O)[O-]	1.64485	7.79692	27.1476	152.624	230.699
CN(c1nc(N(CCO[N+](=O)[O-])[N+](=O)[O-])c([N+](=O)[O-])n1C)[N+](=O)[O-]	1.6623	7.87898	26.7561	129.005	188.078
CN(c1nc(N(CCO[N+](=O)[O-])[N+](=O)[O-])cn1C)[N+](=O)[O-]	1.57792	7.47267	22.9406	113.822	188.037
CN(c1nc(N(CCO[N+](=O)[O-])[N+](=O)[O-])n(C)c1CCO[N+](=O)[O-])[N+](=O)[O-]	1.57597	7.48678	22.5696	121.407	209.372
CN(c1nc(N(CCO[N+](=O)[O-])[N+](=O)[O-])n(C)c1CO[N+](=O)[O-])[N+](=O)[O-]	1.62234	7.68457	24.9741	114.922	192.598
CN(c1nc(N(CCO[N+](=O)[O-])[N+](=O)[O-])n(C)c1N(C)[N+](=O)[O-])[N+](=O)[O-]	1.60984	7.69574	24.7201	146.735	209.588
CN(c1nc(N(CCO[N+](=O)[O-])[N+](=O)[O-])n(C)c1N(CCO[N+](=O)[O-])[N+](=O)[O-])[N+](=O)[O-]	1.65709	7.87406	26.7908	127.688	203.836
CN(c1nc(N(CCO[N+](=O)[O-])[N+](=O)[O-])n(C)c1[N+](=O)[O-])[N+](=O)[O-]	1.66021	7.88028	26.7287	131.503	192.854
CN(c1nc([N+](=O)[O-])c(CCO[N+](=O)[O-])n1C)[N+](=O)[O-]	1.57687	7.45446	22.0261	108.427	197.485
CN(c1nc([N+](=O)[O-])c(CO[N+](=O)[O-])n1C)[N+](=O)[O-]	1.63423	7.78066	24.929	108.922	189.707
CN(c1nc([N+](=O)[O-])c(N(C)[N+](=O)[O-])n1C)[N+](=O)[O-]	1.61606	7.71661	24.2166	141.492	190.659
CN(c1nc([N+](=O)[O-])c(N(CCO[N+](=O)[O-])[N+](=O)[O-])n1C)[N+](=O)[O-]	1.65468	7.92654	26.7654	129.293	199.021
CN(c1nc([N+](=O)[O-])c([N+](=O)[O-])n1C)[N+](=O)[O-]	1.68574	8.02157	27.0815	125.694	194.501
CN(c1nc([N+](=O)[O-])cn1C)[N+](=O)[O-]	1.58092	7.51389	21.8257	109.23	211.646
CN(c1nc([N+](=O)[O-])n(C)c1CCO[N+](=O)[O-])[N+](=O)[O-]	1.57369	7.46466	21.8346	111.95	199.648
CN(c1nc([N+](=O)[O-])n(C)c1CO[N+](=O)[O-])[N+](=O)[O-]	1.62084	7.72803	24.7389	119.356	196.679
CN(c1nc([N+](=O)[O-])n(C)c1N(C)[N+](=O)[O-])[N+](=O)[O-]	1.6166	7.70602	24.386	141.908	196.214
CN(c1nc([N+](=O)[O-])n(C)c1N(CCO[N+](=O)[O-])[N+](=O)[O-])[N+](=O)[O-]	1.65529	7.88641	26.7365	128.818	198.998
CN(c1nc([N+](=O)[O-])n(C)c1[N+](=O)[O-])[N+](=O)[O-]	1.67963	8.00209	26.9666	129.081	196.327
CN(c1ncc(CCO[N+](=O)[O-])n1C)[N+](=O)[O-]	1.48301	7.06303	16.9839	86.3133	204.232
CN(c1ncc(CO[N+](=O)[O-])n1C)[N+](=O)[O-]	1.53769	7.34671	20.1328	85.3946	194.694
CN(c1ncc(N(CCO[N+](=O)[O-])[N+](=O)[O-])n1C)[N+](=O)[O-]	1.58512	7.57348	22.9387	107.258	193.351
CN(c1ncc([N+](=O)[O-])n1C)[N+](=O)[O-]	1.58199	7.5376	21.8711	109.289	212.448
CN(c1nccn1C)[N+](=O)[O-]	1.41824	6.75499	14.4851	71.3823	219.614
CN(c1ncn(C)c1CCO[N+](=O)[O-])[N+](=O)[O-]	1.47769	6.98358	17.2192	82.042	198.49
CN(c1ncn(C)c1CO[N+](=O)[O-])[N+](=O)[O-]	1.52604	7.27461	20.2059	85.6962	194.106
CN(c1ncn(C)c1N(C)[N+](=O)[O-])[N+](=O)[O-]	1.50446	7.18617	19.4468	120.027	202.277
CN(c1ncn(C)c1N(CCO[N+](=O)[O-])[N+](=O)[O-])[N+](=O)[O-]	1.58108	7.524	23.1336	106.916	194.603
CN(c1ncn(C)c1[N+](=O)[O-])[N+](=O)[O-]	1.57007	7.47347	21.9149	103.566	208.506
COc1c(C)nc(C)n1C	1.16883	5.21015	0.725557	55.4975	265.151
COc1c(C)nc(CCO[N+](=O)[O-])n1C	1.34104	6.09883	9.53247	68.0391	233.304
COc1c(C)nc(CO[N+](=O)[O-])n1C	1.39213	6.34728	12.2709	71.2135	231.019
COc1c(C)nc(N(C)[N+](=O)[O-])n1C	1.36804	6.23581	11.3797	78.8828	226.514
COc1c(C)nc(N(CCO[N+](=O)[O-])[N+](=O)[O-])n1C	1.44313	6.6635	16.5916	86.1121	191.979
COc1c(C)nc([N+](=O)[O-])n1C	1.41849	6.41277	13.2243	85.4652	243.117
COc1c(C)ncn1C	1.18202	5.34654	2.54717	57.3706	263.548
COc1c(CCO[N+](=O)[O-])nc(C)n1C	1.34124	6.0844	9.86208	65.8056	225.026
COc1c(CCO[N+](=O)[O-])nc(CCO[N+](=O)[O-])n1C	1.42634	6.47279	14.2491	85.4248	190.423
COc1c(CCO[N+](=O)[O-])nc(CO[N+](=O)[O-])n1C	1.47891	6.72534	16.6333	73.6493	189.4
COc1c(CCO[N+](=O)[O-])nc(N(C)[N+](=O)[O-])n1C	1.44248	6.64313	15.9032	90.155	195.695
COc1c(CCO[N+](=O)[O-])nc(N(CCO[N+](=O)[O-])[N+](=O)[O-])n1C	1.50524	6.92667	18.791	88.2757	183.507
COc1c(CCO[N+](=O)[O-])nc([N+](=O)[O-])n1C	1.51001	6.88148	17.7177	85.2299	213.272
COc1c(CCO[N+](=O)[O-])ncn1C	1.38862	6.28968	11.6608	59.3731	228.287
COc1c(CO[N+](=O)[O-])nc(C)n1C	1.38061	6.32277	12.5025	71.1673	215.994
COc1c(CO[N+](=O)[O-])nc(CCO[N+](=O)[O-])n1C	1.47521	6.73505	16.1905	76.2724	194.923
COc1c(CO[N+](=O)[O-])nc(CO[N+](=O)[O-])n1C	1.52297	6.97819	19.2072	77.0416	183.594
COc1c(CO[N+](=O)[O-])nc(N(C)[N+](=O)[O-])n1C	1.49653	6.92081	18.3678	85.1745	197.14
COc1c(CO[N+](=O)[O-])nc(N(CCO[N+](=O)[O-])[N+](=O)[O-])n1C	1.54796	7.1404	21.2842	88.4954	176.657
COc1c(CO[N+](=O)[O-])nc([N+](=O)[O-])n1C	1.56643	7.16313	20.8724	88.4651	204.937
COc1c(CO[N+](=O)[O-])ncn1C	1.43907	6.56542	14.6738	63.6999	223.078
COc1c(N(C)[N+](=O)[O-])nc(C)n1C	1.35263	6.20264	11.3489	86.805	210.953
COc1c(N(C)[N+](=O)[O-])nc(CCO[N+](=O)[O-])n1C	1.45335	6.66469	15.7744	80.4831	200.893
COc1c(N(C)[N+](=O)[O-])nc(CO[N+](=O)[O-])n1C	1.48796	6.89923	18.3514	90.7407	191.999
COc1c(N(C)[N+](=O)[O-])nc(N(C)[N+](=O)[O-])n1C	1.47334	6.81922	17.7511	111.735	195.34
COc1c(N(C)[N+](=O)[O-])nc(N(CCO[N+](=O)[O-])[N+](=O)[O-])n1C	1.52081	7.05567	20.8538	114.187	201.161
COc1c(N(C)[N+](=O)[O-])nc([N+](=O)[O-])n1C	1.53877	7.0718	19.9572	102.636	203.215
COc1c(N(C)[N+](=O)[O-])ncn1C	1.40288	6.43258	13.7621	76.5094	215.224
COc1c(N(CCO[N+](=O)[O-])[N+](=O)[O-])nc(C)n1C	1.44551	6.65963	16.4991	81.7731	192.093
COc1c(N(CCO[N+](=O)[O-])[N+](=O)[O-])nc(CCO[N+](=O)[O-])n1C	1.50614	6.9339	18.6903	83.2092	182.314
COc1c(N(CCO[N+](=O)[O-])[N+](=O)[O-])nc(CO[N+](=O)[O-])n1C	1.54979	7.16661	21.0472	81.9588	178.047
COc1c(N(CCO[N+](=O)[O-])[N+](=O)[O-])nc(N(C)[N+](=O)[O-])n1C	1.51747	7.03647	20.7138	122.194	185.557
COc1c(N(CCO[N+](=O)[O-])[N+](=O)[O-])nc(N(CCO[N+](=O)[O-])[N+](=O)[O-])n1C	1.5675	7.214	22.9774	114.652	191.94
COc1c(N(CCO[N+](=O)[O-])[N+](=O)[O-])nc([N+](=O)[O-])n1C	1.5759	7.25117	22.8946	111.833	193.545
COc1c(N(CCO[N+](=O)[O-])[N+](=O)[O-])ncn1C	1.49751	6.89884	18.4138	73.5376	197.162
COc1c([N+](=O)[O-])nc(C)n1C	1.40398	6.36913	13.1139	87.6993	234.143
COc1c([N+](=O)[O-])nc(CCO[N+](=O)[O-])n1C	1.50845	6.86398	17.3832	89.5946	218.203
COc1c([N+](=O)[O-])nc(CO[N+](=O)[O-])n1C	1.56466	7.14693	20.5705	91.8045	209.707
COc1c([N+](=O)[O-])nc(N(C)[N+](=O)[O-])n1C	1.54	7.07079	19.8238	104.272	205.03
COc1c([N+](=O)[O-])nc(N(CCO[N+](=O)[O-])[N+](=O)[O-])n1C	1.58462	7.34021	22.5695	100.269	189.597
COc1c([N+](=O)[O-])nc([N+](=O)[O-])n1C	1.6117	7.34457	22.8472	102.809	219.912
COc1c([N+](=O)[O-])ncn1C	1.46223	6.65525	16.0243	78.7129	239.59
COc1cn(C)c(C)n1	1.21395	5.37762	2.20416	40.1972	285.948
COc1cn(C)c(CCO[N+](=O)[O-])n1	1.37836	6.27554	11.3827	63.5801	226.816
COc1cn(C)c(CO[N+](=O)[O-])n1	1.43976	6.56771	14.6085	64.529	224.42
COc1cn(C)c(N(C)[N+](=O)[O-])n1	1.41136	6.45395	13.6751	73.113	223.059
COc1cn(C)c(N(CCO[N+](=O)[O-])[N+](=O)[O-])n1	1.49099	6.87682	18.6513	79.705	192.225
COc1cn(C)c(OC)n1	1.26665	5.54775	6.75739	36.6967	238.332
COc1cn(C)c([N+](=O)[O-])n1	1.47457	6.68781	16.2058	77.3231	242.686
COc1cn(C)cn1	1.2714	5.61978	4.40035	37.4252	294.795
COc1cnc(C)n1C	1.2103	5.37843	2.2259	41.3759	283.873
COc1cnc(CCO[N+](=O)[O-])n1C	1.38588	6.29075	11.1458	68.5273	237.057
COc1cnc(CO[N+](=O)[O-])n1C	1.44152	6.57696	14.4492	68.6124	229.201
COc1cnc(N(C)[N+](=O)[O-])n1C	1.41469	6.47088	13.5787	74.0526	227.607
COc1cnc(N(CCO[N+](=O)[O-])[N+](=O)[O-])n1C	1.49084	6.91644	18.2792	79.1942	197.51
COc1cnc(OC)n1C	1.28519	5.57077	6.33955	35.7745	257.825
COc1cnc([N+](=O)[O-])n1C	1.48378	6.70115	16.0444	80.251	251.081
COc1cncn1C	1.24313	5.59941	4.80779	39.3513	278.428
COc1nc(C)c(C)n1C	1.17074	5.21935	0.956634	57.0946	263.115
COc1nc(C)c(CCO[N+](=O)[O-])n1C	1.34117	6.09637	9.78998	65.5649	225.024
COc1nc(C)c(CO[N+](=O)[O-])n1C	1.39128	6.34272	12.3251	68.9539	227.016
COc1nc(C)c(N(C)[N+](=O)[O-])n1C	1.36702	6.23525	11.2755	79.3284	227.569
COc1nc(C)c(N(CCO[N+](=O)[O-])[N+](=O)[O-])n1C	1.44316	6.65407	16.3279	86.7026	207.551
COc1nc(C)c(OC)n1C	1.23704	5.37876	4.73837	43.2808	238.836
COc1nc(C)c([N+](=O)[O-])n1C	1.41274	6.40052	13.1437	82.9636	238.49
COc1nc(C)cn1C	1.19519	5.36647	2.60751	48.0934	267.712
COc1nc(C)n(C)c1C	1.16798	5.20587	0.758461	56.7527	264.091
COc1nc(C)n(C)c1CCO[N+](=O)[O-]	1.33862	6.07248	9.88518	66.8321	222.023
COc1nc(C)n(C)c1CO[N+](=O)[O-]	1.3837	6.32578	12.5755	70.023	215.002
COc1nc(C)n(C)c1N(C)[N+](=O)[O-]	1.35185	6.1837	11.3833	88.6752	213.879
COc1nc(C)n(C)c1N(CCO[N+](=O)[O-])[N+](=O)[O-]	1.44151	6.64791	16.2458	86.6138	208.255
COc1nc(C)n(C)c1OC	1.21581	5.34587	4.98041	53.056	217.718
COc1nc(C)n(C)c1[N+](=O)[O-]	1.38663	6.35057	13.4347	102.329	219.992
COc1nc(CCO[N+](=O)[O-])c(C)n1C	1.34467	6.09572	9.67699	65.9517	232.737
COc1nc(CCO[N+](=O)[O-])c(CCO[N+](=O)[O-])n1C	1.42631	6.4834	14.1445	83.4078	189.273
COc1nc(CCO[N+](=O)[O-])c(CO[N+](=O)[O-])n1C	1.47446	6.72403	16.6982	74.4788	185.645
COc1nc(CCO[N+](=O)[O-])c(N(C)[N+](=O)[O-])n1C	1.4388	6.61941	15.9473	96.597	197.062
COc1nc(CCO[N+](=O)[O-])c(N(CCO[N+](=O)[O-])[N+](=O)[O-])n1C	1.50304	6.82061	19.4424	101.816	171.414
COc1nc(CCO[N+](=O)[O-])c(OC)n1C	1.36487	6.05316	11.5013	61.3639	198.978
COc1nc(CCO[N+](=O)[O-])c([N+](=O)[O-])n1C	1.50882	6.87715	17.8927	82.5424	208.891
COc1nc(CCO[N+](=O)[O-])cn1C	1.38909	6.28474	11.4985	60.8342	230.882
COc1nc(CCO[N+](=O)[O-])n(C)c1C	1.34938	6.07834	9.96803	65.2462	229.573
COc1nc(CCO[N+](=O)[O-])n(C)c1CCO[N+](=O)[O-]	1.42959	6.49071	14.1264	77.3817	189.849
COc1nc(CCO[N+](=O)[O-])n(C)c1CO[N+](=O)[O-]	1.47468	6.73815	16.1805	76.1017	194.531
COc1nc(CCO[N+](=O)[O-])n(C)c1N(C)[N+](=O)[O-]	1.45469	6.67295	15.6614	81.3614	205.937
COc1nc(CCO[N+](=O)[O-])n(C)c1N(CCO[N+](=O)[O-])[N+](=O)[O-]	1.5035	6.94046	18.5562	85.5458	191.694
COc1nc(CCO[N+](=O)[O-])n(C)c1OC	1.37002	6.05829	11.3811	60.3376	205.626
COc1nc(CCO[N+](=O)[O-])n(C)c1[N+](=O)[O-]	1.51133	6.86391	17.7488	85.5933	214.344
COc1nc(CO[N+](=O)[O-])c(C)n1C	1.38177	6.33091	12.4348	69.8987	218.191
COc1nc(CO[N+](=O)[O-])c(CCO[N+](=O)[O-])n1C	1.46842	6.69663	16.819	82.2926	181.769
COc1nc(CO[N+](=O)[O-])c(CO[N+](=O)[O-])n1C	1.50983	6.95643	19.2324	90.5978	180.742
COc1nc(CO[N+](=O)[O-])c(N(C)[N+](=O)[O-])n1C	1.4816	6.86014	18.6839	100.257	180.171
COc1nc(CO[N+](=O)[O-])c(N(CCO[N+](=O)[O-])[N+](=O)[O-])n1C	1.54396	7.12785	21.1464	95.0049	183.754
COc1nc(CO[N+](=O)[O-])c(OC)n1C	1.40183	6.26672	14.6766	65.7498	178.139
COc1nc(CO[N+](=O)[O-])c([N+](=O)[O-])n1C	1.56186	7.15361	21.0383	85.5793	199.518
COc1nc(CO[N+](=O)[O-])cn1C	1.44088	6.57079	14.5575	64.8194	225.363
COc1nc(CO[N+](=O)[O-])n(C)c1C	1.38979	6.33212	12.7268	69.4606	218.173
COc1nc(CO[N+](=O)[O-])n(C)c1CCO[N+](=O)[O-]	1.46893	6.73125	16.3339	80.6365	188.758
COc1nc(CO[N+](=O)[O-])n(C)c1CO[N+](=O)[O-]	1.52141	6.98932	18.9578	77.7599	186.547
COc1nc(CO[N+](=O)[O-])n(C)c1N(C)[N+](=O)[O-]	1.49008	6.9014	18.4077	89.5492	192.23
COc1nc(CO[N+](=O)[O-])n(C)c1N(CCO[N+](=O)[O-])[N+](=O)[O-]	1.54508	7.13401	21.0615	92.7609	182.938
COc1nc(CO[N+](=O)[O-])n(C)c1OC	1.41219	6.29626	14.1124	61.2889	194.192
COc1nc(CO[N+](=O)[O-])n(C)c1[N+](=O)[O-]	1.55946	7.15272	20.7268	89.2363	204.252
COc1nc(N(C)[N+](=O)[O-])c(C)n1C	1.35687	6.20429	11.4149	84.1824	215.426
COc1nc(N(C)[N+](=O)[O-])c(CCO[N+](=O)[O-])n1C	1.44528	6.63808	15.9852	85.987	190.95
COc1nc(N(C)[N+](=O)[O-])c(CO[N+](=O)[O-])n1C	1.48589	6.8744	18.6818	93.7409	180.561
COc1nc(N(C)[N+](=O)[O-])c(N(C)[N+](=O)[O-])n1C	1.45776	6.76255	17.7081	129.673	187.553
COc1nc(N(C)[N+](=O)[O-])c(N(CCO[N+](=O)[O-])[N+](=O)[O-])n1C	1.52069	7.08205	20.7413	111.125	201.121
COc1nc(N(C)[N+](=O)[O-])c(OC)n1C	1.38123	6.16551	13.2433	70.8522	195.272
COc1nc(N(C)[N+](=O)[O-])c([N+](=O)[O-])n1C	1.52252	7.03258	19.9729	109.654	191.13
COc1nc(N(C)[N+](=O)[O-])cn1C	1.41098	6.44596	13.843	72.4691	217.576
COc1nc(N(C)[N+](=O)[O-])n(C)c1C	1.36268	6.21925	11.4441	81.077	220.167
COc1nc(N(C)[N+](=O)[O-])n(C)c1CCO[N+](=O)[O-]	1.44987	6.67382	15.6585	82.8237	203.326
COc1nc(N(C)[N+](=O)[O-])n(C)c1CO[N+](=O)[O-]	1.49317	6.90339	18.5442	87.5975	187.144
COc1nc(N(C)[N+](=O)[O-])n(C)c1N(C)[N+](=O)[O-]	1.4764	6.84298	17.6648	109.179	203.001
COc1nc(N(C)[N+](=O)[O-])n(C)c1N(CCO[N+](=O)[O-])[N+](=O)[O-]	1.52174	7.05626	20.7761	115.19	194.004
COc1nc(N(C)[N+](=O)[O-])n(C)c1OC	1.38663	6.18875	13.2088	68.6477	199.609
COc1nc(N(C)[N+](=O)[O-])n(C)c1[N+](=O)[O-]	1.53819	7.0669	19.9856	103.941	201.674
COc1nc(N(CCO[N+](=O)[O-])[N+](=O)[O-])c(C)n1C	1.45338	6.67433	16.4129	77.4319	202.885
COc1nc(N(CCO[N+](=O)[O-])[N+](=O)[O-])c(CCO[N+](=O)[O-])n1C	1.5062	6.9135	18.9494	84.0834	184.599
COc1nc(N(CCO[N+](=O)[O-])[N+](=O)[O-])c(CO[N+](=O)[O-])n1C	1.55169	7.1374	21.3875	81.7028	171.969
COc1nc(N(CCO[N+](=O)[O-])[N+](=O)[O-])c(N(C)[N+](=O)[O-])n1C	1.51508	6.94274	21.3574	142.707	226.414
COc1nc(N(CCO[N+](=O)[O-])[N+](=O)[O-])c(N(CCO[N+](=O)[O-])[N+](=O)[O-])n1C	1.56976	7.25891	23.0669	103.157	186.881
COc1nc(N(CCO[N+](=O)[O-])[N+](=O)[O-])c(OC)n1C	1.45636	6.56524	17.2226	72.4163	177.577
COc1nc(N(CCO[N+](=O)[O-])[N+](=O)[O-])c([N+](=O)[O-])n1C	1.59547	7.34372	23.1281	91.9545	184.77
COc1nc(N(CCO[N+](=O)[O-])[N+](=O)[O-])cn1C	1.49237	6.89	18.4877	76.7313	194.028
COc1nc(N(CCO[N+](=O)[O-])[N+](=O)[O-])n(C)c1C	1.44549	6.67676	16.3907	81.8927	203.663
COc1nc(N(CCO[N+](=O)[O-])[N+](=O)[O-])n(C)c1CCO[N+](=O)[O-]	1.50637	6.94928	18.549	82.5196	187.033
COc1nc(N(CCO[N+](=O)[O-])[N+](=O)[O-])n(C)c1CO[N+](=O)[O-]	1.5518	7.17411	21.0348	81.3646	179.424
COc1nc(N(CCO[N+](=O)[O-])[N+](=O)[O-])n(C)c1N(C)[N+](=O)[O-]	1.53133	7.10641	20.8158	100.586	194.493
COc1nc(N(CCO[N+](=O)[O-])[N+](=O)[O-])n(C)c1N(CCO[N+](=O)[O-])[N+](=O)[O-]	1.57066	7.29277	22.6117	101.073	185.584
COc1nc(N(CCO[N+](=O)[O-])[N+](=O)[O-])n(C)c1OC	1.45318	6.5208	17.3699	83.3706	184.307
COc1nc(N(CCO[N+](=O)[O-])[N+](=O)[O-])n(C)c1[N+](=O)[O-]	1.59088	7.31988	23.0664	99.427	184.28
COc1nc(OC)n(C)c1C	1.21594	5.35136	5.04268	54.3767	217.355
COc1nc(OC)n(C)c1CCO[N+](=O)[O-]	1.3701	6.06326	11.2847	60.8858	207.159
COc1nc(OC)n(C)c1CO[N+](=O)[O-]	1.41355	6.2952	14.2097	60.3764	192.7
COc1nc(OC)n(C)c1N(C)[N+](=O)[O-]	1.37942	6.1704	13.2987	72.2506	190.532
COc1nc(OC)n(C)c1N(CCO[N+](=O)[O-])[N+](=O)[O-]	1.45126	6.52543	17.2625	84.0316	180.468
COc1nc(OC)n(C)c1OC	1.26128	5.44213	8.16097	40.9354	187.396
COc1nc(OC)n(C)c1[N+](=O)[O-]	1.43417	6.36644	15.459	75.129	199.975
COc1nc([N+](=O)[O-])c(C)n1C	1.40473	6.37151	13.2389	86.2786	232.049
COc1nc([N+](=O)[O-])c(CCO[N+](=O)[O-])n1C	1.50286	6.84838	17.9268	83.3413	204.338
COc1nc([N+](=O)[O-])c(CO[N+](=O)[O-])n1C	1.55999	7.14183	20.9094	85.7279	199.708
COc1nc([N+](=O)[O-])c(N(C)[N+](=O)[O-])n1C	1.52684	7.04078	19.9155	106.183	193.52
COc1nc([N+](=O)[O-])c(N(CCO[N+](=O)[O-])[N+](=O)[O-])n1C	1.58034	7.30456	22.7589	101.626	199.458
COc1nc([N+](=O)[O-])c(OC)n1C	1.43796	6.36221	15.3057	72.9936	204.68
COc1nc([N+](=O)[O-])c([N+](=O)[O-])n1C	1.59818	7.32328	22.9287	96.6876	207.71
COc1nc([N+](=O)[O-])cn1C	1.47136	6.67572	16.0571	76.7712	242.936
COc1nc([N+](=O)[O-])n(C)c1C	1.40824	6.39221	13.4287	88.295	232.798
[truncated: 1,293 more rows]

## Sheet: tra-1
SMILES	Density	Dv	P	Tm	Td
[truncated: 189 more rows]

## Sheet: tra-2
SMILES	Density	Dv	P	Tm	Td
[truncated: 105 more rows]

[truncated: 8 more sheets: tra-3, tra-4, tet-1, tet-2, Oxa-1, Oxa-2, Oxa-4, Oxa-3]
